# Supplementary material
Source: PubMed Central journal article supplement (PMC5554302)
Supplement: NIHMS866509-supplement-supp_table1.pdf [file NIHMS866509-supplement-supp_table1.pdf]

**Extended Data Table 1.** Summary of TRAP Data

| <b>Gene</b>   | <b>IP</b> | <b>Input</b> | <b>IP/Input</b> |
|---------------|-----------|--------------|-----------------|
| Hist1h4m      | 30.9465   | 1.1705       | 26.43870141     |
| Rpl10a        | 114679.29 | 4403.7775    | 26.04111765     |
| Tmem121       | 15.01     | 1.0755       | 13.9562994      |
| Hist1h2bb     | 48.3165   | 3.9265       | 12.30523367     |
| 1700021C14Rik | 14.8625   | 1.266        | 11.73973144     |
| Hist2h4       | 79.9145   | 6.9545       | 11.49104896     |
| 3110009E18Rik | 13.2115   | 1.1545       | 11.44348203     |
| Tmod3         | 74.5665   | 7.754        | 9.616520506     |
| Tarbp2        | 14.8365   | 1.606        | 9.238169365     |
| Gm13072       | 426.7765  | 47.819       | 8.924831134     |
| Hist1h2bj     | 19.082    | 2.295        | 8.31459695      |
| Thg1l         | 20.995    | 2.842        | 7.387403237     |
| Gm13981       | 9.4585    | 1.328        | 7.122364458     |
| Fam131c       | 32.4305   | 4.8395       | 6.701208803     |
| Hist3h2ba     | 112.701   | 17.0155      | 6.623431577     |
| Atp5l         | 1601.9725 | 243.986      | 6.565837794     |
| 2310039H08Rik | 19.4495   | 2.9715       | 6.545347468     |
| Cox6b2        | 29.0345   | 4.5345       | 6.403021281     |
| LOC100046034  | 7.8605    | 1.23         | 6.390650407     |
| Hist2h2ac     | 26.474    | 4.6935       | 5.640566741     |
| Hist1h1b      | 10.8375   | 1.981        | 5.470721858     |
| Sec61g        | 145.782   | 27.032       | 5.392941699     |
| Ripply2       | 14.431    | 2.6995       | 5.345804779     |
| Hist1h2bm     | 17.6915   | 3.331        | 5.311167817     |
| Kazald1       | 7.23      | 1.3615       | 5.310319501     |
| Gm1673        | 196.871   | 37.7115      | 5.220449995     |
| Lsm4          | 96.964    | 18.702       | 5.18468613      |
| Tpm2          | 11.5445   | 2.2395       | 5.1549453       |
| Tceb2         | 1118.8645 | 217.27       | 5.149650205     |
| LOC100503724  | 18.896    | 3.676        | 5.140369967     |
| Dok5          | 19.914    | 3.888        | 5.12191358      |
| Zfand2b       | 11.3      | 2.2185       | 5.093531666     |
| Gm10221       | 959.7975  | 189.045      | 5.077084821     |
| Hist1h4c      | 23.187    | 4.613        | 5.026446998     |
| Tomm7         | 99.485    | 20.2315      | 4.917331883     |
| LOC100503172  | 4.8475    | 1            | 4.8475          |
| Atp5j2        | 794.921   | 164.7975     | 4.823622931     |
| Ndufa5        | 519.466   | 109.497      | 4.744111711     |
| Refbp2        | 10.402    | 2.195        | 4.738952164     |
| Usmg5         | 905.3675  | 193.094      | 4.688739681     |
| Fkbpl         | 10.465    | 2.2605       | 4.629506746     |
| Gm6900        | 14.4895   | 3.138        | 4.617431485     |
| Uqcr11        | 562.0235  | 121.9935     | 4.606995455     |
| Ndufc1        | 1029.66   | 223.8245     | 4.600300682     |
| C1qtnf4       | 23.7265   | 5.17         | 4.58926499      |
| Scyl2         | 67.2215   | 14.7345      | 4.56218399      |
| Atp5e         | 884.0335  | 194.6755     | 4.541061921     |
| Nop10         | 552.92    | 121.8365     | 4.538213097     |
| Gm561         | 207.151   | 45.702       | 4.532646274     |
| Med11         | 15.6685   | 3.4975       | 4.479914224     |
| Gm3244        | 142.6045  | 31.9815      | 4.458968466     |
| Dpm3          | 97.691    | 22.02        | 4.436466848     |

|               |          |          |             |
|---------------|----------|----------|-------------|
| Rpa3          | 23.536   | 5.3055   | 4.436151164 |
| 1810022K09Rik | 213.1715 | 48.6205  | 4.384395471 |
| Sprr1a        | 8.503    | 1.942    | 4.378475798 |
| Efcab10       | 23.106   | 5.2935   | 4.364975914 |
| Rtn4r         | 5.283    | 1.2115   | 4.360709864 |
| Rundc2a       | 5.6745   | 1.302    | 4.358294931 |
| Pfdn4         | 98.098   | 22.597   | 4.341195734 |
| Ndufa2        | 442.895  | 102.053  | 4.339852822 |
| Uqcrq         | 895.4335 | 206.533  | 4.335546862 |
| LOC100503459  | 186.453  | 43.153   | 4.320742474 |
| Ndufa7        | 397.406  | 92.807   | 4.28206924  |
| Gm10029       | 8.967    | 2.0965   | 4.277128548 |
| Cox7a2        | 701.558  | 164.2645 | 4.270904547 |
| Hist1h4d      | 383.8715 | 89.964   | 4.266945667 |
| Romo1         | 558.065  | 130.8035 | 4.266437825 |
| Rps27l        | 81.3645  | 19.193   | 4.239279946 |
| Chchd1        | 103.97   | 24.789   | 4.19419904  |
| Hist1h4i      | 12.2045  | 2.9135   | 4.188948001 |
| Psmg4         | 31.823   | 7.6255   | 4.173234542 |
| Thumpd2       | 5.453    | 1.31     | 4.16259542  |
| Gm9803        | 84.6665  | 20.4375  | 4.142703364 |
| Znrd1as       | 17.02    | 4.151    | 4.100216815 |
| Ndufb4        | 669.6945 | 164.4095 | 4.073332137 |
| Ndufb2        | 345.829  | 85.383   | 4.050326177 |
| Pafah1b3      | 133.1685 | 32.939   | 4.042882298 |
| Bnip1         | 30.48    | 7.5765   | 4.022965749 |
| Gm6788        | 23.385   | 5.8225   | 4.016316015 |
| Hist1h3a      | 4.8405   | 1.208    | 4.007036424 |
| Dynll1        | 351.472  | 87.826   | 4.001912873 |
| Nudt17        | 14       | 3.5085   | 3.990309249 |
| Ubl5          | 246.934  | 62.4455  | 3.95439223  |
| Mif           | 1387.941 | 351.8165 | 3.945070797 |
| Mrpl33        | 157.8685 | 40.1515  | 3.931820729 |
| Ndufa4        | 1127.489 | 286.923  | 3.929587381 |
| Dnajc15       | 185.236  | 47.4605  | 3.902950875 |
| Cox6b1        | 1172.932 | 301.2515 | 3.893530821 |
| Dctpp1        | 34.417   | 8.869    | 3.880595332 |
| Dnajc19       | 84.2545  | 21.7635  | 3.871367197 |
| 2900010M23Rik | 162.7415 | 42.0995  | 3.865639734 |
| Adrb1         | 7.9425   | 2.056    | 3.863083658 |
| Lyplal1       | 10.1655  | 2.6335   | 3.860072147 |
| 2010107E04Rik | 829.43   | 215.4745 | 3.849318597 |
| Nubp1         | 5.169    | 1.346    | 3.840267459 |
| Gm10053       | 106.7795 | 27.9305  | 3.82304291  |
| Ndufa1        | 260.1105 | 68.1745  | 3.815363516 |
| Atpif1        | 943.722  | 247.695  | 3.810016351 |
| Ndufa8        | 397.685  | 105.1755 | 3.781156258 |
| 2310030G06Rik | 4.262    | 1.1275   | 3.780044346 |
| Chchd10       | 919.0805 | 243.336  | 3.777001759 |
| Mrpl12        | 91.7185  | 24.3105  | 3.772793649 |
| Gm10177       | 136.083  | 36.1795  | 3.761328929 |
| Cacng8        | 23.781   | 6.3285   | 3.757762503 |
| A230065H16Rik | 21.8015  | 5.838    | 3.73441247  |
| Als2cr4       | 13.823   | 3.7175   | 3.718359112 |
| Pvalb         | 29.033   | 7.853    | 3.697058449 |

|               |          |          |             |
|---------------|----------|----------|-------------|
| Sac3d1        | 10.68    | 2.8915   | 3.693584645 |
| Csrp2         | 13.949   | 3.78     | 3.69021164  |
| Rrp36         | 28.8155  | 7.8225   | 3.683668904 |
| Sncb          | 306.3235 | 83.6175  | 3.663389841 |
| Med31         | 62.377   | 17.0655  | 3.655152208 |
| 1110032A04Rik | 6.6325   | 1.8195   | 3.645232207 |
| Mrps34        | 46.6085  | 12.792   | 3.643566291 |
| Mrpl53        | 111.517  | 30.649   | 3.638520017 |
| Mrpl34        | 245.71   | 68.006   | 3.613063553 |
| Ndufa3        | 429.3675 | 119.0985 | 3.605146161 |
| Tstd1         | 4.6395   | 1.2915   | 3.592334495 |
| Slc25a10      | 5.735    | 1.6025   | 3.578783151 |
| 2310016M24Rik | 185.8115 | 51.962   | 3.575911243 |
| Cox5a         | 538.115  | 151.293  | 3.556773942 |
| Ndufa11       | 116.921  | 32.8785  | 3.556153717 |
| Gm10269       | 5.034    | 1.4255   | 3.531392494 |
| Ndufv3        | 283.1175 | 80.255   | 3.527724129 |
| Uqcr10        | 936.83   | 266.121  | 3.520315947 |
| Hist1h3e      | 17.704   | 5.0405   | 3.512349965 |
| 1810035L17Rik | 270.3785 | 77.1005  | 3.506831992 |
| Pfdn1         | 96.259   | 27.7075  | 3.474113507 |
| Dhrs7         | 13.473   | 3.89     | 3.463496144 |
| Crh           | 10.258   | 2.9625   | 3.462616034 |
| Pgam2         | 5.257    | 1.5215   | 3.455142951 |
| Atp6v1f       | 309.981  | 90.0715  | 3.441499253 |
| Robld3        | 215.405  | 62.835   | 3.428105355 |
| Zfp771        | 9.2435   | 2.704    | 3.418454142 |
| Chmp6         | 18.375   | 5.3775   | 3.417015342 |
| Yjefn3        | 14.928   | 4.3885   | 3.401617865 |
| Grhl3         | 3.6075   | 1.0645   | 3.388914984 |
| Gm14166       | 38.471   | 11.3665  | 3.384595082 |
| Gtpbp3        | 9.2395   | 2.736    | 3.377010234 |
| Ap3b2         | 66.1715  | 19.6025  | 3.375666369 |
| Atox1         | 151.137  | 45.0185  | 3.35721981  |
| Coq4          | 19.075   | 5.691    | 3.351783518 |
| Higd2a        | 537.3105 | 161.155  | 3.334122429 |
| Slc32a1       | 89.945   | 26.9835  | 3.333333333 |
| Tmub1         | 13.4975  | 4.0515   | 3.331482167 |
| Thap3         | 29.049   | 8.735    | 3.32558672  |
| Uck1          | 18.016   | 5.4465   | 3.307812357 |
| Ndufs7        | 437.7275 | 132.355  | 3.307222999 |
| Spa17         | 23.504   | 7.1075   | 3.3069293   |
| Gm7536        | 102.3315 | 30.986   | 3.302507584 |
| Ndufs6        | 370.673  | 112.2485 | 3.302253482 |
| Rnasek        | 1259.338 | 382.285  | 3.294238592 |
| Gm2000        | 132.873  | 40.4095  | 3.288162437 |
| 1110001J03Rik | 204.405  | 62.3255  | 3.279636746 |
| Slc29a1       | 6.839    | 2.09     | 3.272248804 |
| Setx          | 24.6525  | 7.5895   | 3.248237697 |
| Zfp787        | 8.7665   | 2.706    | 3.239652624 |
| Cda           | 10.26    | 3.173    | 3.233532934 |
| Rpusd4        | 4.9825   | 1.5415   | 3.232241323 |
| Cox5b         | 955.902  | 296.0255 | 3.229120464 |
| Sssca1        | 121.4445 | 37.619   | 3.228275605 |
| Erh           | 212.669  | 66.26    | 3.209613643 |

|               |          |          |             |
|---------------|----------|----------|-------------|
| Hcfc1r1       | 90.5105  | 28.2195  | 3.207374333 |
| Uqcrh         | 1024.428 | 319.768  | 3.203660154 |
| Tmem203       | 20.6155  | 6.4395   | 3.201413153 |
| Neil2         | 3.21     | 1.004    | 3.197211155 |
| Polr2j        | 113.0315 | 35.4185  | 3.19131245  |
| Amdhd2        | 8.4855   | 2.6655   | 3.183455262 |
| Cox6c         | 1169.184 | 367.3745 | 3.182539888 |
| Tmem115       | 7.5355   | 2.369    | 3.180878008 |
| Ndufs5        | 556.87   | 175.1975 | 3.178527091 |
| Akr7a5        | 8.509    | 2.684    | 3.170268256 |
| 3110001D03Rik | 71.866   | 22.804   | 3.151464655 |
| Gm3934        | 41.1595  | 13.0795  | 3.146871058 |
| Mrpl23        | 120.5825 | 38.3315  | 3.145780885 |
| Aacs          | 8.351    | 2.6555   | 3.144793824 |
| Fxyd2         | 17.076   | 5.4605   | 3.127186155 |
| Fabp3         | 201.4065 | 64.438   | 3.125585834 |
| Gpn2          | 6.3545   | 2.0355   | 3.121837386 |
| Smcr7         | 8.1415   | 2.6085   | 3.121142419 |
| Gng13         | 34.468   | 11.07    | 3.11364047  |
| 1700023F06Rik | 12.3255  | 3.962    | 3.110928824 |
| Timm8b        | 582.267  | 187.1765 | 3.110791152 |
| Cox6a1        | 1259.033 | 405.38   | 3.105809364 |
| 0910001L09Rik | 61.816   | 19.904   | 3.105707396 |
| Mrpl20        | 123.253  | 39.7875  | 3.097781967 |
| Gal           | 165.235  | 53.3665  | 3.096230781 |
| Ext2          | 45.0985  | 14.62    | 3.084712722 |
| 1810006K21Rik | 77.5565  | 25.195   | 3.078249653 |
| Ankrd37       | 6.8325   | 2.2215   | 3.075624578 |
| Rpp21         | 89.0795  | 28.966   | 3.075312435 |
| Fam183b       | 29.623   | 9.639    | 3.073244112 |
| Mrpl52        | 231.916  | 75.4635  | 3.073220829 |
| Plvap         | 13.111   | 4.268    | 3.071930647 |
| 6330527O06Rik | 26.8755  | 8.7975   | 3.054901961 |
| Gabarapl2     | 93.432   | 30.6985  | 3.043536329 |
| Tomm6         | 183.46   | 60.291   | 3.04290856  |
| Ndufb5        | 253.883  | 83.477   | 3.041352708 |
| Vps37d        | 14.171   | 4.6595   | 3.041313446 |
| Scand1        | 26.3855  | 8.684    | 3.038403961 |
| Lsm7          | 66.373   | 21.8525  | 3.037318385 |
| Sec61b        | 98.2725  | 32.541   | 3.019959436 |
| Mrpl36        | 152.6785 | 50.693   | 3.01182609  |
| Grc10         | 372.4755 | 123.888  | 3.006550271 |
| Serf1         | 26.694   | 8.8835   | 3.004896719 |
| Yif1b         | 19.432   | 6.469    | 3.003864585 |
| Atp5k         | 717.4725 | 239.2265 | 2.999134711 |
| Srp14         | 328.308  | 109.564  | 2.996495199 |
| Chchd2        | 873.471  | 291.535  | 2.996110244 |
| Sirt4         | 7.408    | 2.474    | 2.994341148 |
| Hist1h2bg     | 4.9485   | 1.6535   | 2.992742667 |
| Fxc1          | 25.846   | 8.6365   | 2.992647485 |
| Tm2d1         | 13.792   | 4.61     | 2.99175705  |
| Eepd1         | 4.6815   | 1.568    | 2.98565051  |
| Rpusd1        | 24.703   | 8.279    | 2.98381447  |
| Dem1          | 9.462    | 3.175    | 2.98015748  |
| Ccdc124       | 69.304   | 23.2565  | 2.97998409  |

|               |           |         |             |
|---------------|-----------|---------|-------------|
| B9d2          | 16.1645   | 5.4245  | 2.979905982 |
| Gm6181        | 14.1095   | 4.741   | 2.976059903 |
| Krtcap2       | 97.895    | 32.9065 | 2.97494416  |
| Ogg1          | 4.4665    | 1.503   | 2.97172322  |
| Gm4184        | 23.592    | 7.958   | 2.964563961 |
| Atp5o         | 696.3875  | 235.365 | 2.95875555  |
| Fbxo36        | 11.5315   | 3.899   | 2.957553219 |
| Clpp          | 73.673    | 24.9465 | 2.953239933 |
| Med29         | 14.0985   | 4.778   | 2.950711595 |
| Cpsf4         | 9.0705    | 3.0765  | 2.948317894 |
| Exoc3l        | 7.0715    | 2.3985  | 2.948301021 |
| Snrpd2        | 313.486   | 106.388 | 2.946629319 |
| Ggal          | 15.5245   | 5.275   | 2.943033175 |
| Hspe1         | 497.7365  | 169.167 | 2.942278931 |
| Nup37         | 5.3885    | 1.832   | 2.941320961 |
| Mrps28        | 51.903    | 17.651  | 2.940513285 |
| Gm5453        | 4.136     | 1.409   | 2.935415188 |
| Cox7c         | 1456.53   | 496.616 | 2.932909934 |
| Ftsj1         | 19.625    | 6.7015  | 2.928448855 |
| Abhd14a       | 17.4085   | 5.9675  | 2.917218266 |
| Tmsb15b2      | 9.4325    | 3.2335  | 2.917117674 |
| Tmem147       | 52.0075   | 17.88   | 2.908696868 |
| Emg1          | 68.5575   | 23.5775 | 2.907751034 |
| Tmtc4         | 17.9835   | 6.191   | 2.904781134 |
| Ap2s1         | 190.141   | 65.7045 | 2.893880937 |
| Ndufb11       | 198.029   | 68.503  | 2.890807702 |
| Pam16         | 132.821   | 46.069  | 2.883088411 |
| Zfp526        | 8.2695    | 2.87    | 2.881358885 |
| Mpdu1         | 22.532    | 7.8395  | 2.874162893 |
| Magohb        | 15.055    | 5.2505  | 2.867345967 |
| Ccne1         | 8.7895    | 3.07    | 2.863029316 |
| Cox4i1        | 1328.1925 | 464.274 | 2.860794488 |
| Inpp1         | 18.2865   | 6.4035  | 2.855703912 |
| Cstb          | 186.609   | 65.3505 | 2.855509904 |
| Chchd6        | 62.848    | 22.0685 | 2.847860072 |
| Mrpl42        | 200.2255  | 70.3335 | 2.846801311 |
| 1700021F05Rik | 52.319    | 18.46   | 2.834182015 |
| Commd3        | 128.821   | 45.4835 | 2.832257852 |
| Lsm5          | 29.329    | 10.3715 | 2.827845538 |
| Pcdhgc5       | 14.1865   | 5.022   | 2.824870569 |
| H2afj         | 22.4      | 7.932   | 2.824004034 |
| Nts           | 150.985   | 53.4855 | 2.822914622 |
| Arl2          | 224.412   | 79.578  | 2.820025635 |
| LOC100503508  | 16.9975   | 6.0295  | 2.819056306 |
| Sip1          | 7.621     | 2.709   | 2.813215209 |
| Gm13202       | 3.758     | 1.336   | 2.812874252 |
| Fbxl6         | 4.8475    | 1.7235  | 2.812590659 |
| Mansc1        | 5.409     | 1.9245  | 2.810600156 |
| Lsmd1         | 207.3635  | 74.0745 | 2.799391154 |
| Snx17         | 63.6795   | 22.752  | 2.798852848 |
| Lrrc24        | 13.3515   | 4.7755  | 2.795832897 |
| Atp5g1        | 1218.382  | 435.859 | 2.795358132 |
| Hist1h2bf     | 12.347    | 4.431   | 2.786504175 |
| Ranbp1        | 204.155   | 73.3515 | 2.783242333 |
| Fads6         | 12.434    | 4.48    | 2.775446429 |

|               |           |          |             |
|---------------|-----------|----------|-------------|
| Rplp2         | 1203.59   | 435.3495 | 2.764652308 |
| Asphd1        | 36.7955   | 13.31    | 2.764500376 |
| Cox8a         | 1076.501  | 390.349  | 2.757791105 |
| Nudt8         | 7.8945    | 2.8645   | 2.755978356 |
| B3galt6       | 5.5375    | 2.0095   | 2.755660612 |
| Lor           | 8.2815    | 3.0195   | 2.742672628 |
| Rnf126        | 41.1985   | 15.031   | 2.740902136 |
| Abcb9         | 5.6705    | 2.07     | 2.739371981 |
| Poc1a         | 6.5305    | 2.386    | 2.737007544 |
| Ndufs3        | 221.8755  | 81.1255  | 2.734966194 |
| 2410015M20Rik | 123.2695  | 45.261   | 2.723525773 |
| Dusp6         | 12.8255   | 4.71     | 2.723036093 |
| Gm5617        | 51.565    | 18.95    | 2.721108179 |
| Ndufa12       | 477.701   | 175.92   | 2.71544452  |
| Pcx           | 4.6715    | 1.723    | 2.711259431 |
| Spns1         | 4.6405    | 1.712    | 2.71057243  |
| Dhps          | 41.826    | 15.448   | 2.707534956 |
| 2310003F16Rik | 218.517   | 80.764   | 2.705623793 |
| Rwdd1         | 42.5915   | 15.746   | 2.704909183 |
| Fam125a       | 19.6555   | 7.2685   | 2.704203068 |
| Ndufb3        | 324.9015  | 120.2415 | 2.702074575 |
| Cmc1          | 28.1175   | 10.4105  | 2.70087892  |
| 1700040I03Rik | 8.4925    | 3.1445   | 2.700747337 |
| Wdr3          | 6.4465    | 2.387    | 2.700670297 |
| Taf10         | 36.5955   | 13.553   | 2.700177083 |
| Gm10175       | 301.928   | 111.8685 | 2.698954576 |
| Klhdc3        | 76.3715   | 28.336   | 2.695211039 |
| Hagh          | 57.2915   | 21.2725  | 2.693218945 |
| Hist2h2bb     | 6.768     | 2.514    | 2.692124105 |
| Cetn2         | 62.3415   | 23.165   | 2.691193611 |
| Pcp4          | 1592.2515 | 592.1915 | 2.688744266 |
| 2410002I01Rik | 4.053     | 1.5105   | 2.683217478 |
| 1810049H13Rik | 8.466     | 3.1585   | 2.680386259 |
| Sdf211        | 24.347    | 9.0895   | 2.678585181 |
| 2310028O11Rik | 114.253   | 42.762   | 2.671834807 |
| H1fx          | 6.1285    | 2.294    | 2.671534438 |
| Immp21        | 4.347     | 1.6285   | 2.669327602 |
| Mrpl14        | 50.355    | 18.8755  | 2.667743901 |
| Dpy30         | 117.9415  | 44.3065  | 2.661945764 |
| Pop5          | 59.863    | 22.4945  | 2.6612283   |
| Snrpd3        | 43.4085   | 16.3205  | 2.659753071 |
| Cgref1        | 30.081    | 11.3175  | 2.657919152 |
| Psenen        | 410.1285  | 154.8025 | 2.649366128 |
| Mrps16        | 52.6855   | 19.904   | 2.646980506 |
| Dapk3         | 26.782    | 10.123   | 2.645658402 |
| Gng3          | 1687.7025 | 639.2355 | 2.640188944 |
| Mrps21        | 198.2895  | 75.1915  | 2.637126537 |
| Gm3837        | 17.4095   | 6.604    | 2.63620533  |
| Tmem218       | 9.9925    | 3.7915   | 2.635500462 |
| 1110008F13Rik | 29.6895   | 11.285   | 2.630881701 |
| Bola2         | 153.476   | 58.337   | 2.630851775 |
| Uba52         | 1437.8195 | 546.9185 | 2.628946543 |
| Ndufa6        | 154.226   | 58.7555  | 2.624877671 |
| Zfp637        | 30.885    | 11.77    | 2.62404418  |
| Gm10154       | 96.5545   | 36.8205  | 2.622302793 |

|               |          |          |             |
|---------------|----------|----------|-------------|
| Nccrp1        | 5.5275   | 2.1115   | 2.617807246 |
| Hist1h2bl     | 2.7865   | 1.065    | 2.616431925 |
| Ndufb6        | 204.2125 | 78.2415  | 2.610027926 |
| Dync1h1       | 81.697   | 31.304   | 2.609794275 |
| Lin7b         | 99.8805  | 38.4075  | 2.600546768 |
| Uqcrb         | 128.8765 | 49.6065  | 2.597976072 |
| Clptm11       | 21.4905  | 8.288    | 2.592965734 |
| Ndufab1       | 96.0515  | 37.052   | 2.592343193 |
| Psmc3         | 49.3505  | 19.0635  | 2.588742886 |
| Tnfrsf8       | 2.902    | 1.1225   | 2.585300668 |
| Ndufb7        | 216.105  | 83.628   | 2.584122543 |
| Tac2          | 424.6965 | 164.3485 | 2.584121547 |
| Rpl36         | 1209.866 | 469.321  | 2.577907232 |
| 1110058L19Rik | 53.296   | 20.7195  | 2.572262844 |
| Tmem86a       | 7.9325   | 3.085    | 2.571312804 |
| Kctd21        | 15.5865  | 6.0665   | 2.569273881 |
| 1700029F09Rik | 3.319    | 1.293    | 2.566898685 |
| Ddt           | 149.2415 | 58.1835  | 2.565014136 |
| Tmsb10        | 1099.414 | 428.6385 | 2.564897927 |
| Ppp4c         | 21.8285  | 8.518    | 2.562632073 |
| Ccdc56        | 175.002  | 68.355   | 2.56019311  |
| Pde11a        | 4.5205   | 1.767    | 2.558290889 |
| 2410022L05Rik | 161.1775 | 63.017   | 2.557682847 |
| Hyal2         | 5.3595   | 2.102    | 2.549714558 |
| Psmc3         | 191.649  | 75.2245  | 2.547693903 |
| Rpp30         | 30.274   | 11.885   | 2.547244426 |
| Ccdc52        | 3.547    | 1.393    | 2.546302943 |
| Lig4          | 8.675    | 3.4075   | 2.545854732 |
| Prdx5         | 580.7205 | 228.138  | 2.545479052 |
| 6330512M04Rik | 7.2885   | 2.869    | 2.540432206 |
| Cdipt         | 29.175   | 11.488   | 2.539606546 |
| Pdlim7        | 36.7385  | 14.483   | 2.536663675 |
| Jak1          | 63.437   | 25.056   | 2.531808748 |
| Slc10a3       | 6.0785   | 2.4015   | 2.531126379 |
| Rpl34         | 182.276  | 72.095   | 2.528275192 |
| 2610528E23Rik | 27.1505  | 10.754   | 2.524688488 |
| Slc2a6        | 5.5655   | 2.2065   | 2.522320417 |
| Gtf2h3        | 10.608   | 4.2065   | 2.521811482 |
| Rcc1          | 4.993    | 1.98     | 2.521717172 |
| Gm5526        | 92.5135  | 36.7385  | 2.518162146 |
| 5730403M16Rik | 5.602    | 2.226    | 2.516621743 |
| 3110040N11Rik | 42.525   | 16.8995  | 2.516346637 |
| Rpl39         | 607.093  | 241.3915 | 2.514972565 |
| Cdc42ep3      | 11.8005  | 4.6945   | 2.513686229 |
| Abtb1         | 7.28     | 2.901    | 2.50947949  |
| Gm10196       | 7.3495   | 2.938    | 2.501531654 |
| Dbn1          | 25.44    | 10.1785  | 2.499385961 |
| Polr2i        | 44.8585  | 17.95    | 2.49908078  |
| Znrd1         | 55.4675  | 22.1975  | 2.498817434 |
| Cltb          | 154.256  | 61.79    | 2.496455737 |
| B4galt3       | 11.1075  | 4.453    | 2.494385807 |
| Ube2s         | 97.654   | 39.1855  | 2.49209529  |
| Mrpl51        | 77.8825  | 31.257   | 2.491681863 |
| Npdc1         | 66.47    | 26.7125  | 2.488348152 |
| Brp44         | 177.95   | 71.5395  | 2.48743701  |

|               |          |          |             |
|---------------|----------|----------|-------------|
| Cdk4          | 54.9745  | 22.101   | 2.487421384 |
| Hint2         | 78.615   | 31.626   | 2.485771201 |
| Ube2d1        | 137.102  | 55.1595  | 2.485555525 |
| Gm10047       | 8.051    | 3.241    | 2.484109843 |
| Rpl38         | 1187.776 | 478.229  | 2.483697141 |
| D4Bwg0951e    | 4.4195   | 1.7805   | 2.48216793  |
| Pgp           | 43.94    | 17.7245  | 2.479054416 |
| Atp5d         | 673.6085 | 272.0185 | 2.476333411 |
| Srrm2         | 267.34   | 108.001  | 2.47534745  |
| 5430437P03Rik | 64.4715  | 26.0715  | 2.472872677 |
| Utp18         | 7.927    | 3.211    | 2.468701339 |
| Raly          | 14.342   | 5.811    | 2.468077784 |
| Mrps18a       | 111.0805 | 45.01    | 2.467907132 |
| Qsox2         | 14.0355  | 5.691    | 2.46626252  |
| Ccdc12        | 30.7025  | 12.467   | 2.462701532 |
| Slc7a4        | 9.3885   | 3.8155   | 2.460621151 |
| Abhd11        | 32.8335  | 13.344   | 2.460544065 |
| Ndufv2        | 149.3165 | 60.7085  | 2.45956497  |
| 1810014F10Rik | 57.7955  | 23.594   | 2.44958464  |
| Lipt1         | 6.976    | 2.853    | 2.445145461 |
| H2afx         | 100.475  | 41.154   | 2.441439471 |
| Spr           | 16.9085  | 6.9375   | 2.437261261 |
| Slc35b2       | 5.1445   | 2.112    | 2.435842803 |
| Dnajc17       | 24.3815  | 10.0125  | 2.435106117 |
| Lrrc48        | 4.5845   | 1.8835   | 2.434032387 |
| Pex16         | 11.2925  | 4.6415   | 2.432941937 |
| Ssu72         | 136.468  | 56.1055  | 2.432346205 |
| Ly6h          | 32.5455  | 13.3925  | 2.430128803 |
| Glrx5         | 100.3455 | 41.3595  | 2.426177783 |
| Gbx2          | 5.175    | 2.133    | 2.426160338 |
| 2900010J23Rik | 193.64   | 79.9105  | 2.423210967 |
| Fabp5         | 114.8795 | 47.4205  | 2.422570407 |
| Sepx1         | 15.7665  | 6.511    | 2.421517432 |
| Moxd1         | 2.8435   | 1.1745   | 2.421030226 |
| Bloc1s2       | 55.889   | 23.086   | 2.420904444 |
| Mrpl32        | 58.2575  | 24.111   | 2.416220812 |
| Timm13        | 45.307   | 18.7975  | 2.410267323 |
| Clasp2        | 163.716  | 67.941   | 2.409678986 |
| Nit2          | 16.0925  | 6.6785   | 2.409597964 |
| Med30         | 25.6065  | 10.635   | 2.407757405 |
| Atf6b         | 6.675    | 2.7725   | 2.407574391 |
| Thyn1         | 80.562   | 33.471   | 2.406919423 |
| Mtpap         | 18.63    | 7.742    | 2.406354947 |
| Crhbp         | 8.326    | 3.462    | 2.404968226 |
| 1700037H04Rik | 197.9145 | 82.317   | 2.404296804 |
| Gm6136        | 55.644   | 23.1615  | 2.402435075 |
| Nenf          | 71.8125  | 29.899   | 2.401836182 |
| Fam53a        | 8.8805   | 3.698    | 2.401433207 |
| Bud31         | 82.307   | 34.287   | 2.400530813 |
| Dctn3         | 259.444  | 108.1235 | 2.399515369 |
| Apex1         | 34.4755  | 14.3785  | 2.397711861 |
| Pdcd5         | 191.3465 | 79.817   | 2.397315108 |
| Rpl221l       | 312.9475 | 130.652  | 2.395275235 |
| Ccdc107       | 11.5365  | 4.819    | 2.393961403 |
| Tmem132a      | 5.7475   | 2.401    | 2.393794252 |



|               |          |          |             |
|---------------|----------|----------|-------------|
| Nudt1         | 8.1525   | 3.406    | 2.39357017  |
| Tbca          | 520.2655 | 217.7865 | 2.388878558 |
| Ephx1         | 7.9945   | 3.3485   | 2.387486934 |
| Rxrg          | 10.388   | 4.352    | 2.386948529 |
| BC048546      | 7.584    | 3.1775   | 2.386782061 |
| Pusl1         | 15.131   | 6.346    | 2.38433659  |
| 1110001A16Rik | 33.9535  | 14.258   | 2.381364848 |
| Slc22a5       | 4.762    | 2        | 2.381       |
| Coro1a        | 54.127   | 22.7725  | 2.376858052 |
| Osbpl10       | 6.8565   | 2.8855   | 2.376191301 |
| Krt25         | 2.564    | 1.0795   | 2.375173692 |
| Fggy          | 9.516    | 4.0075   | 2.374547723 |
| Txn1          | 241.7655 | 101.8745 | 2.37316993  |
| Micall2       | 3.3345   | 1.4055   | 2.372465315 |
| Grtp1         | 13.7785  | 5.8085   | 2.372127055 |
| Mpp3          | 15.8845  | 6.706    | 2.368699672 |
| N6amt2        | 28.6045  | 12.091   | 2.365767927 |
| Mrpl21        | 72.4075  | 30.617   | 2.364944312 |
| Paqr7         | 12.195   | 5.159    | 2.3638302   |
| Mrpl43        | 87.838   | 37.162   | 2.363651041 |
| G0s2          | 5.5335   | 2.343    | 2.361715749 |
| Tpra1         | 11.6395  | 4.9285   | 2.361671908 |
| Ramp2         | 4.0985   | 1.7375   | 2.358848921 |
| Iscu          | 289.4815 | 122.8275 | 2.356813417 |
| Zfp385b       | 81.039   | 34.391   | 2.356401384 |
| Khk           | 15.2935  | 6.4905   | 2.356289962 |
| Tmem222       | 88.6795  | 37.677   | 2.35367731  |
| Ssr4          | 54.53    | 23.172   | 2.353271189 |
| Tuba8         | 8.321    | 3.5375   | 2.352226148 |
| Praf2         | 190.779  | 81.132   | 2.35146428  |
| Pnoc          | 29.9535  | 12.7445  | 2.350307976 |
| Grwd1         | 8.139    | 3.465    | 2.348917749 |
| Pofut2        | 19.935   | 8.4895   | 2.348194829 |
| Hebp1         | 14.255   | 6.0765   | 2.345922817 |
| Spes1         | 75.2695  | 32.0875  | 2.345757694 |
| Rps28         | 613.903  | 261.7175 | 2.345670427 |
| Sra1          | 51.3925  | 21.9165  | 2.344922775 |
| D430042O09Rik | 3.7845   | 1.62     | 2.336111111 |
| Pde6d         | 101.826  | 43.6175  | 2.334521694 |
| Uchl3         | 46.371   | 19.8725  | 2.333425588 |
| Smn1          | 21.9285  | 9.399    | 2.333067348 |
| Hspb11        | 26.7     | 11.4465  | 2.332590748 |
| Alk           | 3.703    | 1.592    | 2.326005025 |
| C330021F23Rik | 2.5285   | 1.088    | 2.323988971 |
| Atp5j         | 464.389  | 199.8405 | 2.323798229 |
| Siva1         | 25.0135  | 10.7655  | 2.323487065 |
| Pgls          | 13.7485  | 5.921    | 2.321989529 |
| Fbll1         | 40.9755  | 17.6715  | 2.318733554 |
| Rnaseh2c      | 64.015   | 27.6155  | 2.318082236 |
| Cycs          | 156.661  | 67.599   | 2.317504697 |
| Hint1         | 397.7925 | 171.7615 | 2.315958466 |
| Ndufb8        | 314.5345 | 135.9525 | 2.313561722 |
| Cox17         | 337.403  | 146.046  | 2.310251565 |
| 1110008P14Rik | 108.2935 | 46.9595  | 2.306104196 |
| Kcnj11        | 7.965    | 3.456    | 2.3046875   |

|               |          |          |             |
|---------------|----------|----------|-------------|
| Cxx1b         | 106.9445 | 46.4215  | 2.303770882 |
| Yrdc          | 8.686    | 3.7705   | 2.303673253 |
| Ube2m         | 40.2     | 17.452   | 2.303460921 |
| Acn9          | 29.723   | 12.9075  | 2.302769708 |
| Ndufs4        | 94.7155  | 41.136   | 2.302496597 |
| Zfp628        | 6.9795   | 3.036    | 2.298913043 |
| Hist1h1e      | 46.1265  | 20.07    | 2.298281016 |
| Shh           | 5.7565   | 2.5055   | 2.2975454   |
| Pcdhga9       | 4.3935   | 1.914    | 2.295454545 |
| Ndufc2        | 447.346  | 195.1075 | 2.292818062 |
| Prmt10        | 4.5225   | 1.9755   | 2.28929385  |
| Fancf         | 4.3255   | 1.8895   | 2.289229955 |
| Pin4          | 91.829   | 40.14    | 2.287717987 |
| Dcun1d5       | 25.518   | 11.1575  | 2.287071477 |
| Dis3l2        | 9.683    | 4.234    | 2.286962683 |
| Cacna2d3      | 8.716    | 3.8135   | 2.285564442 |
| Egfl7         | 3.8705   | 1.6965   | 2.281461833 |
| 0610037L13Rik | 51.99    | 22.799   | 2.280363174 |
| Lgmn          | 31.9265  | 14.004   | 2.279812911 |
| Vsig10l       | 3.395    | 1.4895   | 2.279288352 |
| Mid1          | 28.7535  | 12.652   | 2.272644641 |
| P4htm         | 19.256   | 8.4795   | 2.270888614 |
| Suclg1        | 92.775   | 40.8705  | 2.269974676 |
| Ypel3         | 236.823  | 104.33   | 2.269941532 |
| Eif1          | 347.8985 | 153.268  | 2.269870423 |
| Trappc6a      | 6.218    | 2.74     | 2.269343066 |
| Lsm1          | 14.044   | 6.19     | 2.268820679 |
| 6330409D20Rik | 9.656    | 4.257    | 2.268264036 |
| Tm2d3         | 77.623   | 34.243   | 2.266828257 |
| Gm4604        | 153.767  | 67.8405  | 2.266595912 |
| Coq7          | 61.1855  | 27.0155  | 2.26482945  |
| Nme2          | 220.0635 | 97.1715  | 2.264691808 |
| Tyw3          | 4.9125   | 2.17     | 2.263824885 |
| Btf3          | 237.828  | 105.0975 | 2.262927282 |
| Tspan4        | 6.8745   | 3.038    | 2.262837393 |
| Lrrc42        | 10.6845  | 4.723    | 2.262227398 |
| Gm5908        | 5.088    | 2.2505   | 2.260830926 |
| Ccdc85c       | 5.393    | 2.3885   | 2.257902449 |
| Anapc11       | 11.848   | 5.248    | 2.257621951 |
| Map1lc3a      | 129.101  | 57.221   | 2.256182171 |
| Tpd52l1       | 45.7385  | 20.2885  | 2.254405205 |
| Xylt2         | 4.0635   | 1.803    | 2.25374376  |
| Ctxn2         | 54.564   | 24.212   | 2.25359326  |
| 0610011F06Rik | 104.527  | 46.3845  | 2.253489851 |
| Atp5g3        | 747.394  | 331.6825 | 2.253341675 |
| Myl6b         | 185.817  | 82.5035  | 2.252231724 |
| Mgst3         | 98.63    | 43.801   | 2.251775074 |
| Pcbd1         | 133.656  | 59.36    | 2.251617251 |
| Slc46a1       | 4.715    | 2.0945   | 2.251133922 |
| Ostc          | 31.529   | 14.015   | 2.249661077 |
| Pqbp1         | 117.5945 | 52.3535  | 2.246163103 |
| Nme1          | 232.9525 | 103.7895 | 2.24447078  |
| Evl           | 71.2415  | 31.7735  | 2.242167215 |
| Mrpl13        | 80.225   | 35.7825  | 2.242017746 |
| LOC100504116  | 35.8755  | 16.0095  | 2.240888223 |

|               |           |          |             |
|---------------|-----------|----------|-------------|
| Lars2         | 12300.984 | 5490.047 | 2.240597121 |
| Dexi          | 24.1895   | 10.803   | 2.239146533 |
| Ydjc          | 15.3445   | 6.8535   | 2.238929014 |
| Rai12         | 60.5165   | 27.05    | 2.237208872 |
| Cuta          | 347.189   | 155.194  | 2.237129013 |
| Fkbp1b        | 56.61     | 25.3945  | 2.229222863 |
| Sh3bgrl3      | 460.0025  | 206.409  | 2.228597106 |
| Gm4459        | 230.0995  | 103.4165 | 2.224978606 |
| Rpl27         | 487.231   | 219.118  | 2.223600982 |
| Fam36a        | 39.0665   | 17.5715  | 2.22328771  |
| Dact2         | 2.4445    | 1.1      | 2.222272727 |
| Myeov2        | 221.9385  | 99.9425  | 2.220661881 |
| Arhgdig       | 45.014    | 20.294   | 2.218094018 |
| Comtd1        | 5.7205    | 2.583    | 2.214672861 |
| Car4          | 3.6885    | 1.6655   | 2.214650255 |
| Lage3         | 42.4925   | 19.1915  | 2.214131256 |
| Gpr83         | 12.02     | 5.4315   | 2.213016662 |
| Ube2v1        | 332.4115  | 150.299  | 2.211668075 |
| Slc2a8        | 5.102     | 2.3085   | 2.210093134 |
| Zfp579        | 8.392     | 3.7975   | 2.209874918 |
| 4930538K18Rik | 2.2485    | 1.0185   | 2.207658321 |
| Alg13         | 2.998     | 1.3585   | 2.206845786 |
| Krt10         | 2.912     | 1.32     | 2.206060606 |
| Ctbp1         | 53.0495   | 24.078   | 2.203235319 |
| 4930427A07Rik | 2.736     | 1.2445   | 2.198473282 |
| Gale          | 3.5185    | 1.6005   | 2.198375508 |
| Cisd3         | 64.6655   | 29.439   | 2.196592955 |
| Commd4        | 75.1155   | 34.2215  | 2.194979764 |
| Mt3           | 4.494     | 2.0485   | 2.193800342 |
| Ict1          | 77.7785   | 35.462   | 2.193291411 |
| Prelid1       | 236.986   | 108.108  | 2.192122692 |
| Tmem11        | 47.113    | 21.547   | 2.186522486 |
| Dusp14        | 12.026    | 5.5075   | 2.183567862 |
| Polr2f        | 86.8295   | 39.806   | 2.181316887 |
| Tmem141       | 10.325    | 4.7365   | 2.179879658 |
| Pls3          | 29.0345   | 13.3205  | 2.179685447 |
| Mrpl41        | 54.7555   | 25.129   | 2.178976481 |
| Chrna3        | 2.4555    | 1.1285   | 2.175897209 |
| Apitd1        | 12.617    | 5.8025   | 2.174407583 |
| Ssna1         | 47.6515   | 21.931   | 2.172791938 |
| Gm10051       | 90.1155   | 41.5335  | 2.169706382 |
| Med26         | 8.0585    | 3.716    | 2.168595264 |
| C1rl          | 3.752     | 1.731    | 2.167533218 |
| Nhp2          | 23.2785   | 10.746   | 2.166247906 |
| Cisd1         | 138.856   | 64.102   | 2.166172662 |
| Ankrd9        | 2.828     | 1.306    | 2.165390505 |
| Gpr135        | 3.115     | 1.4395   | 2.163945815 |
| Pfdn5         | 501.0695  | 231.5625 | 2.163862888 |
| Nedd8         | 291.22    | 134.6295 | 2.163121753 |
| Polg2         | 2.92      | 1.35     | 2.162962963 |
| Gm9843        | 526.221   | 243.433  | 2.16166666  |
| Rrp9          | 5.8785    | 2.7205   | 2.160816026 |
| Mrpl54        | 37.396    | 17.319   | 2.15924707  |
| Gm11847       | 98.417    | 45.5855  | 2.158954053 |
| Vgf           | 37.141    | 17.2355  | 2.154912825 |

|               |           |          |             |
|---------------|-----------|----------|-------------|
| Atp5g2        | 89.5585   | 41.5865  | 2.153547425 |
| Sh2d7         | 2.422     | 1.125    | 2.152888889 |
| Tceb1         | 59.2575   | 27.531   | 2.152391849 |
| Park7         | 197.391   | 91.7605  | 2.151154364 |
| Prpf8         | 66.1315   | 30.7425  | 2.151142555 |
| Banf1         | 91.952    | 42.754   | 2.150722739 |
| Fgf18         | 20.547    | 9.557    | 2.149942451 |
| Etnk2         | 3.381     | 1.575    | 2.146666667 |
| Ppa2          | 50.7465   | 23.6645  | 2.14441463  |
| Rab4b         | 54.1035   | 25.249   | 2.142797735 |
| CK137956      | 5.042     | 2.3555   | 2.140522182 |
| 2310007A19Rik | 10.3555   | 4.84     | 2.139566116 |
| Pdap1         | 74.803    | 34.967   | 2.139245574 |
| Dlx2          | 12.4645   | 5.827    | 2.139093873 |
| Foxo6         | 8.7805    | 4.107    | 2.137935233 |
| Cbx8          | 4.28      | 2.0025   | 2.13732834  |
| Tmem91        | 93.7105   | 43.846   | 2.137264517 |
| Zdhhc1        | 12.5745   | 5.888    | 2.13561481  |
| Mrpl37        | 45.364    | 21.2645  | 2.133320793 |
| Dynlrb1       | 1513.6345 | 709.7735 | 2.132559894 |
| Srm           | 67.8175   | 31.808   | 2.132089411 |
| Snrpg         | 119.7715  | 56.182   | 2.131848279 |
| Polr3c        | 14.01     | 6.579    | 2.129502964 |
| Acpl2         | 6.847     | 3.2155   | 2.129373348 |
| Ngfrap1       | 511.5735  | 240.424  | 2.127797142 |
| Mrps18c       | 50.963    | 23.9585  | 2.127136507 |
| Dad1          | 250.5625  | 117.963  | 2.124077041 |
| 3110007F17Rik | 3.352     | 1.5785   | 2.123535002 |
| Fam195a       | 7.184     | 3.3845   | 2.122617817 |
| Gmppb         | 4.263     | 2.009    | 2.12195122  |
| Polr2k        | 43.287    | 20.401   | 2.121807755 |
| Jmjd7         | 3.747     | 1.7665   | 2.121143504 |
| Rps14         | 242.904   | 114.572  | 2.120099152 |
| Rinl          | 2.7605    | 1.3025   | 2.119385797 |
| Phpt1         | 119.4205  | 56.3775  | 2.11822979  |
| Rpl29         | 596.507   | 281.7985 | 2.116785576 |
| Timm9         | 91.3935   | 43.1785  | 2.1166437   |
| Snrpe         | 52.283    | 24.7075  | 2.116078114 |
| 2010005H15Rik | 16.4305   | 7.7685   | 2.115015769 |
| Drd1a         | 2.7635    | 1.307    | 2.114384086 |
| Ccdc106       | 16.702    | 7.902    | 2.113642116 |
| Gpx7          | 3.145     | 1.488    | 2.113575269 |
| Sema6b        | 21.1335   | 9.999    | 2.113561356 |
| Rasgef1c      | 4.7935    | 2.272    | 2.109815141 |
| Mrpl55        | 44.8745   | 21.289   | 2.10787261  |
| Cox18         | 17.5445   | 8.326    | 2.107194331 |
| 2810408M09Rik | 10.8805   | 5.169    | 2.104952602 |
| Esr1          | 12.739    | 6.059    | 2.10249216  |
| Maf1          | 29.431    | 14.0035  | 2.101688864 |
| Dlx5          | 77.982    | 37.11    | 2.101374293 |
| Fam173a       | 66.261    | 31.5505  | 2.100156891 |
| Pttg1         | 45.6205   | 21.7275  | 2.099666321 |
| Arpc4         | 165.191   | 78.678   | 2.099583111 |
| Sdhb          | 131.9685  | 62.875   | 2.098902584 |
| Hist2h2ab     | 18.9565   | 9.0385   | 2.097305969 |

|               |          |          |             |
|---------------|----------|----------|-------------|
| 0610009B22Rik | 101.3635 | 48.372   | 2.095499463 |
| Satb2         | 12.8755  | 6.147    | 2.094598991 |
| Lym2          | 30.3035  | 14.4715  | 2.094012369 |
| Nhp211        | 198.6    | 94.913   | 2.092442553 |
| Blm           | 2.191    | 1.0475   | 2.091646778 |
| BC030500      | 50.567   | 24.1765  | 2.091576531 |
| Gm5107        | 4.7045   | 2.2505   | 2.09042435  |
| Rps21         | 637.2735 | 305.1755 | 2.088219729 |
| Mrpl11        | 31.351   | 15.024   | 2.086727902 |
| Wbscr22       | 34.1525  | 16.381   | 2.084884928 |
| Asna1         | 242.8505 | 116.503  | 2.08449997  |
| Mogs          | 5.5245   | 2.652    | 2.083144796 |
| Fhl2          | 4.8015   | 2.3055   | 2.082628497 |
| Pesk1n        | 156.198  | 75.006   | 2.082473402 |
| Fkbp1a        | 1107.568 | 532.213  | 2.08106153  |
| Xylt1         | 6.8575   | 3.296    | 2.080552184 |
| Vkorc1        | 48.4175  | 23.2765  | 2.080102249 |
| Mrpl22        | 51.3635  | 24.697   | 2.079746528 |
| Kpna2         | 28.2195  | 13.582   | 2.07771315  |
| Slc19a2       | 5.987    | 2.886    | 2.074497575 |
| Rrad          | 5.0135   | 2.418    | 2.073407775 |
| Macrodl       | 3.838    | 1.852    | 2.072354212 |
| Rars2         | 11.1375  | 5.3745   | 2.072285794 |
| Galntl4       | 5.071    | 2.449    | 2.070641078 |
| Spint2        | 19.0845  | 9.218    | 2.070351486 |
| Pmf1          | 9.3545   | 4.5195   | 2.069808607 |
| 1810063B05Rik | 52.3965  | 25.3305  | 2.068514242 |
| Fam165b       | 47.0115  | 22.7425  | 2.067121029 |
| Ubl4          | 33.7825  | 16.3465  | 2.066650353 |
| Gm13841       | 5.843    | 2.8285   | 2.065759236 |
| Hspbp1        | 34.2145  | 16.5785  | 2.063787436 |
| Hmx2          | 3.99     | 1.9335   | 2.063615206 |
| Nrgn          | 91.075   | 44.134   | 2.063601758 |
| 1810030N24Rik | 10.91    | 5.288    | 2.063161876 |
| 1110049F12Rik | 75.6775  | 36.69    | 2.062619242 |
| Dmrtc1a       | 6.5695   | 3.186    | 2.061989956 |
| Gfml          | 28.564   | 13.861   | 2.060745978 |
| Gba           | 23.8105  | 11.557   | 2.060266505 |
| Tmem14c       | 33.4615  | 16.2465  | 2.05961284  |
| Arx           | 17.223   | 8.363    | 2.059428435 |
| Hsbp1         | 1087.814 | 528.3625 | 2.058840285 |
| Dctd          | 6.0835   | 2.956    | 2.058017591 |
| Ints1         | 9.1305   | 4.4395   | 2.056650524 |
| Fank1         | 4.033    | 1.961    | 2.056603774 |
| Gm5561        | 6.6905   | 3.254    | 2.056084819 |
| Cox7b         | 451.4055 | 219.7035 | 2.054612239 |
| Pomp          | 919.5195 | 447.615  | 2.054264267 |
| Bola1         | 35.052   | 17.1025  | 2.049524923 |
| LOC100503055  | 3.8485   | 1.878    | 2.049254526 |
| Hmgn1         | 105.1575 | 51.3455  | 2.048037316 |
| BC056474      | 277.3625 | 135.4435 | 2.047809603 |
| Sema3f        | 2.29     | 1.1195   | 2.045556052 |
| U2af2         | 48.8     | 23.8635  | 2.044964066 |
| Polr2l        | 25.731   | 12.583   | 2.044901852 |
| Rpl35         | 462.4805 | 226.203  | 2.044537429 |

|               |           |          |             |
|---------------|-----------|----------|-------------|
| Necab2        | 24.4505   | 11.9635  | 2.043758098 |
| Rpp25         | 52.495    | 25.6915  | 2.043282798 |
| Ndufa13       | 232.699   | 113.886  | 2.043262561 |
| Polr2c        | 38.3865   | 18.817   | 2.039990434 |
| Shfm1         | 78.513    | 38.489   | 2.039881525 |
| Cck           | 81.6865   | 40.048   | 2.039714842 |
| Dydc2         | 2.2725    | 1.115    | 2.038116592 |
| Parp4         | 3.383     | 1.66     | 2.037951807 |
| Anapc13       | 193.612   | 95.051   | 2.036927544 |
| Mtrf1         | 9.257     | 4.547    | 2.035847812 |
| Eif1b         | 168.2135  | 82.6335  | 2.035657451 |
| Commd2        | 20.4845   | 10.063   | 2.035625559 |
| Lrrc14        | 8.647     | 4.25     | 2.034588235 |
| Myl12b        | 1868.7535 | 918.503  | 2.034564394 |
| Slc16a2       | 6.5535    | 3.2215   | 2.034300792 |
| Rps26         | 828.79    | 407.4645 | 2.034017687 |
| Psmb6         | 190.4435  | 93.7005  | 2.032470478 |
| Fkbp3         | 591.866   | 291.3145 | 2.031707999 |
| Mtch1         | 290.2245  | 142.882  | 2.031218068 |
| Arf5          | 39.099    | 19.254   | 2.030694921 |
| Mrps33        | 165.3375  | 81.4425  | 2.03011327  |
| C1qbp         | 87.7145   | 43.2165  | 2.029653026 |
| Apoa1bp       | 89.3665   | 44.0395  | 2.029235118 |
| Nxt1          | 4.1875    | 2.0655   | 2.027354152 |
| Atp5h         | 765.9775  | 378.185  | 2.025404233 |
| A230050P20Rik | 17.1245   | 8.4565   | 2.025010347 |
| Cited4        | 4.1595    | 2.057    | 2.022119592 |
| Mrps12        | 82.997    | 41.0465  | 2.022023802 |
| Ndfip1        | 236.3535  | 116.9815 | 2.020434855 |
| 0610007C21Rik | 69.461    | 34.393   | 2.019626087 |
| Yif1a         | 6.743     | 3.339    | 2.019466906 |
| A430005L14Rik | 12.933    | 6.4085   | 2.01810096  |
| Wbp11         | 65.9765   | 32.745   | 2.01485723  |
| Polr2h        | 56.8755   | 28.2455  | 2.013612788 |
| Gstp1         | 371.4985  | 184.5075 | 2.013460157 |
| Rpl35a        | 477.663   | 237.444  | 2.011686966 |
| Mtx2          | 38.987    | 19.3805  | 2.011661206 |
| Pard6g        | 3.4085    | 1.6945   | 2.011507819 |
| Polr2d        | 28.505    | 14.1795  | 2.010296555 |
| Rnf208        | 132.1865  | 65.7725  | 2.009753316 |
| Pdpf          | 125.2735  | 62.335   | 2.009681559 |
| Ttc27         | 14.8645   | 7.398    | 2.009259259 |
| Dlx6          | 24.415    | 12.1725  | 2.005750667 |
| Nudt14        | 8.68      | 4.3325   | 2.003462204 |
| Mrpl39        | 86.4685   | 43.22    | 2.000659417 |
| Atp5f1        | 159.253   | 79.614   | 2.000314015 |
| Hebp2         | 6.018     | 3.0135   | 1.99701344  |
| Psmc8         | 91.8475   | 45.995   | 1.996901837 |
| Itpa          | 40.999    | 20.5335  | 1.996688339 |
| 2310003C23Rik | 20.6845   | 10.367   | 1.995225234 |
| Ift27         | 16.235    | 8.137    | 1.995207079 |
| Clec11a       | 4.2085    | 2.1095   | 1.995022517 |
| Pigf          | 5.509     | 2.762    | 1.994569153 |
| Plod2         | 2.4255    | 1.2165   | 1.993834772 |
| Mrps36        | 118.0735  | 59.2365  | 1.993255847 |

|               |          |          |             |
|---------------|----------|----------|-------------|
| Fam96b        | 58.009   | 29.122   | 1.991930499 |
| Gpr162        | 5.849    | 2.938    | 1.990810075 |
| Zmynd19       | 9.354    | 4.699    | 1.990636306 |
| 2010107G23Rik | 25.3605  | 12.74    | 1.990620094 |
| Mrpl30        | 235.1995 | 118.1815 | 1.990154973 |
| Pxmp3         | 7.6095   | 3.824    | 1.989932008 |
| Nell1         | 24.925   | 12.535   | 1.988432389 |
| 2510049J12Rik | 3.871    | 1.947    | 1.988186954 |
| Mitd1         | 5.3785   | 2.706    | 1.987620103 |
| Slc35b1       | 27.5345  | 13.853   | 1.98762001  |
| 1810009A15Rik | 44.002   | 22.151   | 1.986456593 |
| Selm          | 236.4475 | 119.119  | 1.984968813 |
| Smg5          | 24.2475  | 12.221   | 1.984084772 |
| Zc3h3         | 5.6015   | 2.8235   | 1.983885249 |
| Unc119        | 20.043   | 10.104   | 1.983669834 |
| Mlf2          | 268.0745 | 135.2615 | 1.981898027 |
| Tsen34        | 50.886   | 25.684   | 1.981233453 |
| Sf3b5         | 65.5875  | 33.1045  | 1.981226117 |
| Mrpl10        | 54.639   | 27.6025  | 1.979494611 |
| Pard6a        | 10.591   | 5.352    | 1.978886398 |
| Hmx3          | 3.014    | 1.5235   | 1.97833935  |
| Gabarap       | 173.3735 | 87.654   | 1.977930271 |
| Brp44l        | 102.2925 | 51.7215  | 1.977755866 |
| Triap1        | 21.4015  | 10.824   | 1.977226534 |
| Iffo1         | 12.5875  | 6.3685   | 1.976525084 |
| Commd1        | 44.569   | 22.556   | 1.975926583 |
| Nat14         | 6.924    | 3.5045   | 1.97574547  |
| Acot9         | 6.4525   | 3.268    | 1.974449204 |
| Mlx           | 15.483   | 7.8505   | 1.972231068 |
| Ii34          | 10.8705  | 5.512    | 1.972151669 |
| Fmnl1         | 13.133   | 6.662    | 1.971329931 |
| 2410003K15Rik | 37.0435  | 18.798   | 1.970608575 |
| Hmg20b        | 4.582    | 2.3255   | 1.970328962 |
| Cno           | 5.331    | 2.707    | 1.969338751 |
| Frs3          | 14.067   | 7.1445   | 1.968927147 |
| Lmo2          | 9.326    | 4.7375   | 1.968548813 |
| Rabl2         | 22.001   | 11.19    | 1.966130474 |
| Timm17a       | 274.133  | 139.449  | 1.965829802 |
| Med25         | 16.8895  | 8.592    | 1.965723929 |
| Gtf2h4        | 5.9595   | 3.032    | 1.965534301 |
| Rpl36al       | 834.713  | 424.9745 | 1.964148437 |
| 2010305A19Rik | 3.2385   | 1.649    | 1.963917526 |
| Tmem48        | 3.958    | 2.016    | 1.963293651 |
| Cox16         | 17.2365  | 8.7865   | 1.961702612 |
| Ap1s1         | 88.506   | 45.1225  | 1.961460469 |
| Sharpin       | 30.919   | 15.7685  | 1.96080794  |
| Arpc5l        | 73.6695  | 37.572   | 1.96075535  |
| Tceal6        | 89.8965  | 45.8775  | 1.959489946 |
| Znhit1        | 113.4965 | 57.934   | 1.959065488 |
| Snx3          | 117.867  | 60.2175  | 1.95735459  |
| Chchd7        | 24.2685  | 12.4     | 1.957137097 |
| Zfp11         | 12.3825  | 6.332    | 1.955543272 |
| Vstm2l        | 8.9015   | 4.5545   | 1.954440663 |
| Fam159b       | 2.176    | 1.115    | 1.951569507 |
| Gm14173       | 6.129    | 3.141    | 1.951289398 |

|               |          |           |             |
|---------------|----------|-----------|-------------|
| Snrpf         | 42.4855  | 21.7975   | 1.949099667 |
| Gm4987        | 3.056    | 1.568     | 1.948979592 |
| Chst10        | 13.7785  | 7.0705    | 1.948730641 |
| Tomm22        | 133.7695 | 68.7075   | 1.946941746 |
| Bcam          | 4.2375   | 2.177     | 1.94648599  |
| Spin2         | 17.421   | 8.954     | 1.9456109   |
| Manf          | 15.193   | 7.812     | 1.944828469 |
| Snip1         | 7.209    | 3.712     | 1.942079741 |
| Dctn1         | 49.8125  | 25.661    | 1.941175324 |
| Endog         | 8.0405   | 4.1425    | 1.94097767  |
| Aamp          | 67.483   | 34.79     | 1.939724059 |
| Rheb          | 126.6215 | 65.2965   | 1.939177444 |
| Slc9a5        | 4.835    | 2.496     | 1.937099359 |
| 1700001L19Rik | 19.691   | 10.166    | 1.936946685 |
| Ndufaf3       | 91.2515  | 47.121    | 1.936535727 |
| Zscan29       | 2.7905   | 1.4415    | 1.935830732 |
| D8Ertd738e    | 93.7315  | 48.4235   | 1.935661404 |
| Ndufaf2       | 95.732   | 49.493    | 1.934253329 |
| Trappc2l      | 66.0195  | 34.143    | 1.933617433 |
| Bax           | 21.1515  | 10.942    | 1.933056114 |
| Anapc7        | 9.711    | 5.0245    | 1.932729625 |
| Psmb4         | 370.8915 | 191.906   | 1.932672767 |
| Bak1          | 21.897   | 11.3325   | 1.932230311 |
| Cox19         | 30.8     | 15.945    | 1.931640013 |
| Pla2g6        | 8.3095   | 4.3025    | 1.931319001 |
| Tesc          | 8.8325   | 4.5755    | 1.930390121 |
| Ppil1         | 19.3475  | 10.024    | 1.930117717 |
| Ap2m1         | 343.4635 | 178.025   | 1.929299256 |
| Gm3724        | 161.6305 | 83.7815   | 1.929190812 |
| Pex6          | 19.014   | 9.8665    | 1.927127147 |
| Spna2         | 90.044   | 46.726    | 1.927064161 |
| Lhx8          | 65.368   | 33.9345   | 1.926299194 |
| Harbi1        | 3.5955   | 1.8675    | 1.925301205 |
| Gemin4        | 5.2275   | 2.7155    | 1.925059842 |
| 1700019E19Rik | 15.0865  | 7.8395    | 1.9244212   |
| Pcdhgb6       | 4.348    | 2.2595    | 1.92431954  |
| Rabac1        | 100.9765 | 52.484    | 1.923948251 |
| B230118H07Rik | 17.174   | 8.927     | 1.923826593 |
| Cpa2          | 12.6495  | 6.583     | 1.921540331 |
| Rps6kl1       | 12.6505  | 6.5895    | 1.919796646 |
| Sephs2        | 19.008   | 9.9075    | 1.918546556 |
| Dennd2a       | 4.873    | 2.5405    | 1.918126353 |
| Ppia          | 2342.097 | 1222.1005 | 1.916452043 |
| Lpcat4        | 68.445   | 35.728    | 1.915724362 |
| Gm7589        | 13.798   | 7.2025    | 1.915723707 |
| 2410002F23Rik | 56.323   | 29.4115   | 1.914999235 |
| Arl6ip5       | 17.515   | 9.1465    | 1.914940141 |
| Tm4sf5        | 8.077    | 4.219     | 1.9144347   |
| Gpr161        | 2.314    | 1.2095    | 1.913187267 |
| Ppa1          | 105.1395 | 54.958    | 1.913088176 |
| Tk2           | 10.213   | 5.344     | 1.911115269 |
| Cyth2         | 15.124   | 7.919     | 1.909837101 |
| Izumo4        | 21.5285  | 11.2765   | 1.909147342 |
| Nudt7         | 3.82     | 2.001     | 1.909045477 |
| Fau           | 96.879   | 50.7875   | 1.907536303 |



|               |           |           |             |
|---------------|-----------|-----------|-------------|
| Dut           | 20.37     | 10.6835   | 1.906678523 |
| Penk          | 165.007   | 86.625    | 1.904842713 |
| Pcbd2         | 79.447    | 41.7375   | 1.903492063 |
| Sod1          | 2463.7695 | 1294.6865 | 1.902985395 |
| Mapksp1       | 73.085    | 38.421    | 1.902214935 |
| Armc6         | 5.6065    | 2.9475    | 1.902120441 |
| Gm10288       | 212.3485  | 111.65    | 1.901912226 |
| Ndufs8        | 128.873   | 67.78     | 1.901342579 |
| Radil         | 3.4725    | 1.83      | 1.897540984 |
| Tmem192       | 21.053    | 11.1035   | 1.896068807 |
| Xrcc6bp1      | 8.186     | 4.322     | 1.894030541 |
| Bcl7b         | 36.6825   | 19.37     | 1.89377904  |
| Kcnab3        | 15.6955   | 8.288     | 1.893762066 |
| Dhrs7b        | 7.5755    | 4.005     | 1.891510612 |
| Scn1b         | 45.4695   | 24.043    | 1.891174146 |
| Psmg1         | 27.567    | 14.582    | 1.890481415 |
| Rgs10         | 165.034   | 87.2985   | 1.890456308 |
| Imp3          | 36.8975   | 19.5215   | 1.890095536 |
| LOC100502641  | 10.0445   | 5.32      | 1.88806391  |
| Taf12         | 23.133    | 12.255    | 1.887637699 |
| 9430023L20Rik | 16.1025   | 8.5315    | 1.887417219 |
| Lrfn1         | 5.3035    | 2.8105    | 1.887030777 |
| 1810027O10Rik | 42.2575   | 22.398    | 1.886663988 |
| Fundc2        | 29.8105   | 15.8075   | 1.885845327 |
| Aldh1l2       | 2.163     | 1.1475    | 1.88496732  |
| Entpd3        | 4.3465    | 2.3065    | 1.884456969 |
| Nfatc2        | 13.078    | 6.9445    | 1.883216934 |
| Ogdhl         | 9.904     | 5.2605    | 1.882710769 |
| Brd9          | 33.303    | 17.6935   | 1.882216633 |
| Arl3          | 182.8295  | 97.1495   | 1.881939691 |
| Csnk2b        | 140.3015  | 74.5755   | 1.881335023 |
| Ptdss2        | 7.3025    | 3.8845    | 1.879907324 |
| Ube2f         | 19.332    | 10.308    | 1.875436554 |
| Tmed9         | 63.2585   | 33.732    | 1.8753261   |
| Rab1b         | 74.971    | 39.98     | 1.875212606 |
| Ier3          | 14.8895   | 7.941     | 1.875015741 |
| Begain        | 33.009    | 17.6105   | 1.874393118 |
| Ndufb10       | 181.1685  | 96.6715   | 1.874063193 |
| Tusc3         | 47.5725   | 25.385    | 1.874039787 |
| Rexo2         | 90.262    | 48.168    | 1.873899684 |
| Eri3          | 82.097    | 43.82     | 1.873505249 |
| Mc4r          | 3.042     | 1.624     | 1.873152709 |
| Nutf2         | 68.8755   | 36.7805   | 1.872609127 |
| Atp6v0a2      | 31.9075   | 17.0455   | 1.871901675 |
| Sdr39u1       | 123.333   | 65.904    | 1.87140386  |
| Naca          | 380.809   | 203.6015  | 1.870364413 |
| Timm23        | 99.8645   | 53.4175   | 1.869509056 |
| Dnajc30       | 124.939   | 66.836    | 1.869336884 |
| Naa10         | 38.3155   | 20.508    | 1.86831968  |
| Wdr61         | 33.7835   | 18.0885   | 1.867678359 |
| Rhobtb2       | 16.612    | 8.9015    | 1.866202325 |
| CommD9        | 25.256    | 13.536    | 1.865839244 |
| Grhpr         | 33.672    | 18.0565   | 1.864813225 |
| Cbr1          | 122.06    | 65.461    | 1.864621683 |
| Cxx1c         | 788.8375  | 423.227   | 1.863863837 |

|               |          |          |             |
|---------------|----------|----------|-------------|
| Mib2          | 9.582    | 5.151    | 1.860221316 |
| Psme2         | 78.6375  | 42.3105  | 1.858581203 |
| Chrac1        | 13.629   | 7.3345   | 1.858204377 |
| 1810046J19Rik | 122.686  | 66.082   | 1.856572138 |
| Rab3a         | 566.623  | 305.2275 | 1.856395639 |
| Bmyc          | 401.539  | 216.3435 | 1.856025256 |
| Gm13889       | 16.244   | 8.753    | 1.855820861 |
| Sdhd          | 118.6755 | 63.9585  | 1.855507868 |
| Ical          | 18.819   | 10.1425  | 1.855459699 |
| Zfp35         | 6.954    | 3.748    | 1.855389541 |
| Psm2          | 144.592  | 77.9735  | 1.854373601 |
| Mrps9         | 24.3225  | 13.1375  | 1.851379638 |
| Jtb           | 11.307   | 6.1075   | 1.851330332 |
| Mmp11         | 2.127    | 1.149    | 1.851174935 |
| BC024814      | 21.784   | 11.772   | 1.850492695 |
| Rwdd2a        | 89.211   | 48.219   | 1.850121321 |
| Ddost         | 27.8035  | 15.03    | 1.849866933 |
| Pramef8       | 5.5995   | 3.028    | 1.849240423 |
| Pip5k1c       | 35.789   | 19.3605  | 1.84855763  |
| Zbtb45        | 8.993    | 4.865    | 1.848509764 |
| 1500032L24Rik | 174.6585 | 94.493   | 1.848375012 |
| Dohh          | 29.0755  | 15.7375  | 1.847529786 |
| Asb6          | 13.579   | 7.352    | 1.846980413 |
| Dnajc8        | 89.7575  | 48.621   | 1.846064458 |
| Itga3         | 9.918    | 5.373    | 1.845896147 |
| LOC100046290  | 37.793   | 20.4755  | 1.845766892 |
| 4930452B06Rik | 9.4925   | 5.146    | 1.844636611 |
| Snf8          | 63.5875  | 34.488   | 1.843757249 |
| Fam100a       | 91.0395  | 49.3855  | 1.843445951 |
| Rph3al        | 2.79     | 1.514    | 1.842800528 |
| Stra13        | 32.8325  | 17.8225  | 1.842193856 |
| Bre           | 35.231   | 19.139   | 1.84079628  |
| Ppp1r1a       | 20.968   | 11.395   | 1.840105309 |
| Ap4s1         | 41.2775  | 22.4355  | 1.839829734 |
| Psm6          | 134.1485 | 72.917   | 1.839742447 |
| Uchl1         | 575.5775 | 312.925  | 1.839346489 |
| 2310036O22Rik | 80.873   | 43.982   | 1.838774953 |
| Nudt2         | 23.2765  | 12.6605  | 1.838513487 |
| Gprasp1       | 309.9    | 168.562  | 1.838492661 |
| Ensa          | 269.9945 | 147.001  | 1.836684784 |
| Coq9          | 19.428   | 10.591   | 1.834387688 |
| Nudt16l1      | 32.2675  | 17.591   | 1.834318686 |
| Fam171a2      | 4.9645   | 2.707    | 1.833949021 |
| Narg2         | 6.4145   | 3.4985   | 1.833500071 |
| Gm8186        | 35.9265  | 19.6035  | 1.832657434 |
| Nr2c2ap       | 8.079    | 4.4085   | 1.832596121 |
| Ppp1r1l       | 77.399   | 42.257   | 1.83162553  |
| Polm          | 7.8825   | 4.3095   | 1.829098503 |
| Pddc1         | 23.2225  | 12.7045  | 1.827895628 |
| Atp9a         | 35.235   | 19.2805  | 1.8274941   |
| Psm7          | 332.1595 | 181.847  | 1.826587736 |
| A2ld1         | 27.227   | 14.906   | 1.826579901 |
| Dhdpsl        | 4.622    | 2.531    | 1.82615567  |
| Mcts2         | 34.72    | 19.019   | 1.825542878 |
| St8sia5       | 6.3585   | 3.4835   | 1.825319363 |

|               |          |         |             |
|---------------|----------|---------|-------------|
| Fam136a       | 17.2395  | 9.4455  | 1.825154836 |
| Sepn1         | 5.796    | 3.181   | 1.822068532 |
| Gm6816        | 36.0605  | 19.7975 | 1.821467357 |
| 2610524H06Rik | 27.5465  | 15.124  | 1.82137662  |
| Cyp4x1        | 3.5425   | 1.945   | 1.821336761 |
| Rdm1          | 2.1115   | 1.1595  | 1.821043553 |
| Mea1          | 158.536  | 87.0955 | 1.820254778 |
| Fkbp2         | 242.888  | 133.5   | 1.819385768 |
| Nmbr          | 4.036    | 2.219   | 1.818837314 |
| Slc35c2       | 13.344   | 7.3405  | 1.817859819 |
| AI316807      | 19.8485  | 10.921  | 1.817461771 |
| Ndufs1        | 35.8505  | 19.742  | 1.815950765 |
| Chmp4b        | 117.4105 | 64.682  | 1.815195881 |
| Myst1         | 17.408   | 9.591   | 1.815034929 |
| D230037D09Rik | 11.001   | 6.0645  | 1.813999505 |
| Kctd8         | 7.557    | 4.166   | 1.813970235 |
| Wdr36         | 7.781    | 4.2905  | 1.813541545 |
| Rps19bp1      | 42.427   | 23.395  | 1.81350716  |
| 1110065P20Rik | 18.713   | 10.3435 | 1.809155508 |
| Rpl22         | 61.3445  | 33.917  | 1.808665271 |
| Mycbp         | 20.8395  | 11.5245 | 1.808278016 |
| Gadd45gip1    | 25.668   | 14.195  | 1.808242339 |
| LOC100503996  | 2.0775   | 1.149   | 1.808093995 |
| Scyl1         | 22.5205  | 12.457  | 1.807859035 |
| Rfc5          | 2.666    | 1.475   | 1.807457627 |
| Pcdhgb7       | 2.432    | 1.346   | 1.806835067 |
| Panx1         | 6.5255   | 3.6125  | 1.806366782 |
| Bcl11a        | 32.883   | 18.2115 | 1.80561733  |
| Ankrd13d      | 15.2635  | 8.4585  | 1.804516167 |
| Nup85         | 12.147   | 6.732   | 1.804367201 |
| Rnase6        | 1.997    | 1.107   | 1.803974706 |
| Fam58b        | 24.711   | 13.699  | 1.803854296 |
| 0610010O12Rik | 25.352   | 14.0545 | 1.803835071 |
| Cartpt        | 52.5785  | 29.1615 | 1.803010819 |
| Nell2         | 40.896   | 22.6945 | 1.802022516 |
| Pak6          | 15.9905  | 8.888   | 1.799111161 |
| Timm10        | 54.0325  | 30.0595 | 1.797518255 |
| Tmem55b       | 40.256   | 22.398  | 1.797303331 |
| Pdxp          | 158.0165 | 87.946  | 1.796744593 |
| Top2b         | 12.712   | 7.0755  | 1.796622147 |
| Prdx3         | 57.0845  | 31.786  | 1.795900711 |
| Cpsf3l        | 7.181    | 4.0025  | 1.79412867  |
| Spire2        | 13.1855  | 7.35    | 1.793945578 |
| Vps29         | 151.8415 | 84.6515 | 1.79372486  |
| Ccdc28a       | 21.7485  | 12.129  | 1.793099184 |
| Rpl32         | 932.051  | 520.175 | 1.791802759 |
| Wwp2          | 14.6385  | 8.17    | 1.791738066 |
| Acta1         | 4.2915   | 2.3955  | 1.791484033 |
| Acot7         | 323.206  | 180.457 | 1.791041633 |
| 2010107G12Rik | 2.4355   | 1.3605  | 1.79015068  |
| Srp19         | 70.9215  | 39.6215 | 1.78997514  |
| U2af114       | 29.539   | 16.5035 | 1.789862756 |
| Cdh22         | 3.1315   | 1.75    | 1.789428571 |
| Pias3         | 9.731    | 5.4385  | 1.789280132 |
| Mad211        | 6.0185   | 3.3655  | 1.788292973 |

|               |          |          |             |
|---------------|----------|----------|-------------|
| Ddb1          | 49.904   | 27.9445  | 1.785825476 |
| Snrpd1        | 83.0325  | 46.5275  | 1.784589759 |
| Gm12715       | 79.177   | 44.389   | 1.783707675 |
| Mgat4c        | 4.7835   | 2.682    | 1.783557047 |
| Avpi1         | 9.9915   | 5.6045   | 1.78276385  |
| Slc35e4       | 1.8635   | 1.0475   | 1.778997613 |
| Tigd2         | 5.4155   | 3.047    | 1.777321956 |
| Pin1          | 16.6885  | 9.393    | 1.776695411 |
| C1d           | 22.593   | 12.719   | 1.776318893 |
| Tsc22d1       | 158.659  | 89.3265  | 1.776169446 |
| Atp6v0c       | 683.4585 | 384.936  | 1.775512033 |
| Frat1         | 5.428    | 3.059    | 1.77443609  |
| Mrpl38        | 29.5055  | 16.632   | 1.774019962 |
| Rpl28         | 625.7955 | 352.834  | 1.773625841 |
| Cnpy2         | 61.6985  | 34.787   | 1.773607957 |
| Pdcd2l        | 11.2545  | 6.3495   | 1.772501772 |
| Stmn3         | 545.117  | 307.773  | 1.771165762 |
| Bcas2         | 89.072   | 50.296   | 1.770955941 |
| Serpinb6a     | 14.7095  | 8.3075   | 1.77062895  |
| Lyar          | 19.193   | 10.846   | 1.769592476 |
| Nt5dc2        | 4.634    | 2.619    | 1.769377625 |
| Pfdn2         | 356.3345 | 201.444  | 1.768901035 |
| Drap1         | 72.365   | 40.9135  | 1.768731592 |
| Marcks11      | 61.1865  | 34.5955  | 1.768625977 |
| Gas6          | 22.9755  | 12.9915  | 1.768502482 |
| Tmem160       | 7.1745   | 4.057    | 1.768424945 |
| Gm6344        | 11.1165  | 6.2865   | 1.768313052 |
| Ckmt1         | 240.565  | 136.127  | 1.767210032 |
| Senp3         | 15.9245  | 9.014    | 1.766640781 |
| Psmb1         | 147.1705 | 83.312   | 1.766498224 |
| Ccdc28b       | 31.0815  | 17.5955  | 1.766445966 |
| Lrpprc        | 43.012   | 24.3585  | 1.765790176 |
| Dnpep         | 15.6975  | 8.892    | 1.765350877 |
| Gm6251        | 2.041    | 1.1565   | 1.764807609 |
| 2610029G23Rik | 8.513    | 4.824    | 1.764718076 |
| Agpat1        | 91.1655  | 51.6955  | 1.763509396 |
| Shf           | 3.6405   | 2.065    | 1.762953995 |
| Ntan1         | 74.334   | 42.187   | 1.762011994 |
| Psmb2         | 192.524  | 109.2985 | 1.761451438 |
| Dus11         | 9.4215   | 5.3505   | 1.760863471 |
| Gm8430        | 108.4995 | 61.627   | 1.760583835 |
| Pcdhb15       | 3.0295   | 1.7225   | 1.758780842 |
| Cstf3         | 41.9135  | 23.834   | 1.758559201 |
| Cul9          | 5.0065   | 2.848    | 1.757900281 |
| Skp1a         | 256.533  | 145.985  | 1.757255882 |
| St3gal5       | 49.9815  | 28.4465  | 1.757035136 |
| Cacna1a       | 14.085   | 8.018    | 1.756672487 |
| Ttc9b         | 17.3675  | 9.89     | 1.756066734 |
| Acyp2         | 83.544   | 47.586   | 1.755642416 |
| Gm5623        | 21.706   | 12.367   | 1.755154848 |
| Mrps23        | 35.9705  | 20.502   | 1.754487367 |
| Gsto1         | 32.5115  | 18.5335  | 1.754201851 |
| LOC100503890  | 32.1955  | 18.355   | 1.754045219 |
| Siah3         | 12.205   | 6.964    | 1.752584721 |
| Fam175b       | 11.2635  | 6.427    | 1.752528396 |

|               |          |          |             |
|---------------|----------|----------|-------------|
| Txndc17       | 75.063   | 42.8415  | 1.75210952  |
| Pcdhga4       | 2.635    | 1.504    | 1.751994681 |
| Ccdc72        | 321.734  | 183.7095 | 1.751319338 |
| 2310022A10Rik | 16.679   | 9.528    | 1.750524769 |
| Rps27a        | 112.387  | 64.2155  | 1.750153779 |
| Oxtr          | 4.353    | 2.488    | 1.749598071 |
| Abhd10        | 10.6865  | 6.1095   | 1.749161142 |
| Abcc8         | 1.762    | 1.008    | 1.748015873 |
| Nme3          | 59.6325  | 34.1205  | 1.747702994 |
| Masp1         | 2.127    | 1.2175   | 1.747022587 |
| Bmp3          | 3.0055   | 1.7205   | 1.746875908 |
| Fam135b       | 11.075   | 6.343    | 1.746019234 |
| 1700106N22Rik | 36.3585  | 20.842   | 1.744482295 |
| Pcdh8         | 5.1435   | 2.9495   | 1.743854891 |
| Zfp324        | 4.6755   | 2.6825   | 1.742963653 |
| Cops6         | 192.4275 | 110.4025 | 1.742963248 |
| Wdr6          | 58.086   | 33.3295  | 1.74278042  |
| Tomm40        | 32.9495  | 18.9365  | 1.739999472 |
| Emd           | 56.887   | 32.695   | 1.739929653 |
| Abhd8         | 81.5575  | 46.8875  | 1.739429485 |
| Gpaal         | 4.1255   | 2.372    | 1.739249578 |
| Abhd12        | 69.615   | 40.0355  | 1.738831787 |
| Atp5c1        | 300.521  | 172.8685 | 1.73843702  |
| Thap4         | 26.284   | 15.1275  | 1.737497934 |
| 9230110C19Rik | 12.915   | 7.4335   | 1.737404991 |
| Ccl17         | 2.198    | 1.2655   | 1.7368629   |
| Fxn           | 13.3665  | 7.6975   | 1.736472881 |
| Fam134a       | 37.992   | 21.883   | 1.736142211 |
| Resp18        | 434.7045 | 250.4155 | 1.73593288  |
| Tubb3         | 242.6445 | 139.901  | 1.73440147  |
| Rps17         | 860.5925 | 496.2165 | 1.734308513 |
| Mrpl28        | 20.3145  | 11.7185  | 1.733540982 |
| 2810428I15Rik | 83.8945  | 48.404   | 1.733214197 |
| Pacrg         | 22.7135  | 13.111   | 1.732400275 |
| Pfn1          | 389.6485 | 225.0855 | 1.731113288 |
| Tmsb15b1      | 6.0915   | 3.5195   | 1.730785623 |
| Dusp15        | 39.3715  | 22.752   | 1.730463256 |
| Gnl3          | 12.0645  | 6.974    | 1.729925437 |
| Bahd1         | 5.977    | 3.4565   | 1.729205844 |
| Hdac5         | 57.1005  | 33.0255  | 1.72898215  |
| 2900006K08Rik | 2.3125   | 1.3375   | 1.728971963 |
| Bex4          | 64.257   | 37.166   | 1.728918904 |
| Chchd4        | 85.191   | 49.285   | 1.728538095 |
| Tagln3        | 240.0475 | 138.921  | 1.7279425   |
| Usp39         | 11.297   | 6.5385   | 1.727766307 |
| Rac3          | 24.206   | 14.01    | 1.727765882 |
| AI462493      | 12.4925  | 7.2315   | 1.727511581 |
| Fam122a       | 36.7995  | 21.3115  | 1.726743777 |
| Fam192a       | 41.5855  | 24.0855  | 1.726578232 |
| Taf11         | 56.2305  | 32.5765  | 1.726106242 |
| Rab4a         | 69.174   | 40.0805  | 1.725876673 |
| Vps18         | 8.0845   | 4.6895   | 1.723957778 |
| Wdr18         | 23.7725  | 13.7895  | 1.723956634 |
| Hras1         | 43.131   | 25.029   | 1.72324104  |
| Gm3552        | 3.5935   | 2.0855   | 1.723087988 |

|               |           |          |             |
|---------------|-----------|----------|-------------|
| Fam195b       | 37.9715   | 22.037   | 1.723079367 |
| Gm8526        | 5.257     | 3.051    | 1.723041626 |
| Gnb2          | 34.805    | 20.2015  | 1.722891864 |
| Cdkn2aipnl    | 35.147    | 20.403   | 1.722638828 |
| Tbc1d7        | 32.491    | 18.8715  | 1.721696738 |
| Dync1i1       | 28.7315   | 16.6905  | 1.721428357 |
| Fkrp          | 31.117    | 18.089   | 1.720216706 |
| Lysmd2        | 24.746    | 14.3855  | 1.720204372 |
| Fam98b        | 36.334    | 21.136   | 1.719057532 |
| Incenp        | 5.8265    | 3.392    | 1.71771816  |
| Cacybp        | 119.6575  | 69.6795  | 1.717255434 |
| Tcerg1l       | 20.3985   | 11.8855  | 1.716250894 |
| Rragc         | 55.941    | 32.5985  | 1.716060555 |
| Glrx          | 93.1945   | 54.3245  | 1.715515099 |
| 0610010K14Rik | 40.8985   | 23.844   | 1.715253313 |
| C230052I12Rik | 12.6195   | 7.3575   | 1.715188583 |
| B4galnt1      | 51.105    | 29.802   | 1.714817797 |
| Opn3          | 2.6225    | 1.53     | 1.714052288 |
| Rpl27a        | 191.9195  | 111.9945 | 1.713651117 |
| Tmsb4x        | 1033.615  | 603.526  | 1.712627128 |
| Gm10001       | 5.835     | 3.4105   | 1.710892831 |
| Fam98c        | 12.5685   | 7.3485   | 1.710349051 |
| Mapk8ip2      | 27.108    | 15.853   | 1.70996026  |
| Aldh1b1       | 2.2085    | 1.292    | 1.709365325 |
| Rundc3a       | 43.0715   | 25.2     | 1.709186508 |
| Creld2        | 9.3345    | 5.4615   | 1.709145839 |
| Pmm1          | 71.2715   | 41.701   | 1.709107695 |
| Ufsp1         | 24.066    | 14.094   | 1.707535121 |
| Ddx54         | 8.129     | 4.7645   | 1.706160143 |
| Crem          | 5.4135    | 3.1735   | 1.705845281 |
| Snrpb2        | 36.657    | 21.491   | 1.705690754 |
| Pop7          | 24.375    | 14.2945  | 1.705201301 |
| Fxyd7         | 41.57     | 24.401   | 1.703618704 |
| Armc9         | 9.6635    | 5.679    | 1.701620004 |
| Smarcd3       | 33.401    | 19.648   | 1.699969463 |
| Txn2          | 65.9775   | 38.8585  | 1.697891066 |
| Gprasp2       | 143.114   | 84.3225  | 1.697221975 |
| Smyd5         | 14.807    | 8.7255   | 1.696980116 |
| Pinx1         | 16.5275   | 9.746    | 1.695823928 |
| Tmem151a      | 19.806    | 11.686   | 1.694848537 |
| Kcnh6         | 2.7465    | 1.6205   | 1.694847269 |
| Gipc1         | 14.166    | 8.3615   | 1.694193626 |
| Rps16         | 378.7555  | 223.618  | 1.693761236 |
| Sf3b4         | 63.4455   | 37.473   | 1.693099031 |
| Gm3386        | 5.1805    | 3.0645   | 1.690487845 |
| Rpl37a        | 740.0525  | 437.778  | 1.690474396 |
| H2afz         | 1008.4405 | 596.783  | 1.68979428  |
| Calm2         | 1814.7365 | 1074.833 | 1.688389266 |
| Apeh          | 6.3285    | 3.749    | 1.688050147 |
| Tmem97        | 4.6325    | 2.7445   | 1.687921297 |
| Mrpl2         | 24.2225   | 14.3505  | 1.687920282 |
| Mrps7         | 55.1705   | 32.689   | 1.687738995 |
| Acp6          | 8.5245    | 5.051    | 1.687685607 |
| Dpcd          | 68.3935   | 40.533   | 1.687353514 |
| Ap2a1         | 34.4755   | 20.433   | 1.687246121 |

|               |          |          |             |
|---------------|----------|----------|-------------|
| Thap11        | 14.002   | 8.3045   | 1.686073815 |
| Gde1          | 46.198   | 27.425   | 1.684521422 |
| Pdzrn4        | 9.666    | 5.744    | 1.682799443 |
| Gm88          | 14.071   | 8.3635   | 1.682429605 |
| Elmod1        | 106.207  | 63.15    | 1.681821061 |
| BC037034      | 27.178   | 16.161   | 1.681702865 |
| Rasgrp2       | 12.1855  | 7.2465   | 1.681570413 |
| Osgepl1       | 11.779   | 7.0105   | 1.680193995 |
| Slc29a2       | 4.8755   | 2.902    | 1.680048243 |
| 1110038F14Rik | 12.354   | 7.3535   | 1.680016319 |
| Tnfrsf12a     | 2.815    | 1.676    | 1.679594272 |
| Susd1         | 2.385    | 1.4215   | 1.677805135 |
| Cab39l        | 11.388   | 6.789    | 1.677419355 |
| Fnta          | 64.5485  | 38.491   | 1.676976436 |
| Mpv1712       | 9.766    | 5.824    | 1.676854396 |
| Tctn2         | 6.295    | 3.757    | 1.675538994 |
| Stk19         | 13.9755  | 8.3415   | 1.67541809  |
| Clns1a        | 94.248   | 56.272   | 1.674864942 |
| 2700062C07Rik | 40.6585  | 24.281   | 1.674498579 |
| Mrps15        | 111.757  | 66.7535  | 1.674174388 |
| Grm7          | 9.6045   | 5.74     | 1.67325784  |
| Tmem53        | 6.0535   | 3.618    | 1.673161968 |
| Pik3r2        | 8.2625   | 4.9395   | 1.672740156 |
| Rcl1          | 12.529   | 7.491    | 1.672540382 |
| Hmga1         | 152.9905 | 91.481   | 1.672374591 |
| Haghl         | 35.3635  | 21.155   | 1.671637911 |
| Mrps35        | 16.0915  | 9.635    | 1.670108978 |
| Ppih          | 20.7925  | 12.4585  | 1.668940884 |
| Mbip          | 9.412    | 5.64     | 1.668794326 |
| Sumo2         | 137.1645 | 82.2035  | 1.668596836 |
| Tmem17        | 4.106    | 2.461    | 1.668427469 |
| Mtmr14        | 6.3875   | 3.832    | 1.666884134 |
| Cetn3         | 118.5795 | 71.208   | 1.665255308 |
| Carkd         | 15.4625  | 9.287    | 1.664961775 |
| Ifnar2        | 15.063   | 9.048    | 1.664787798 |
| Tmem5         | 13.493   | 8.106    | 1.664569455 |
| Dbn1d1        | 12.4555  | 7.484    | 1.664283805 |
| Get4          | 29.5135  | 17.737   | 1.663951063 |
| Ccdc71        | 22.0115  | 13.229   | 1.66388238  |
| Rps2          | 280.5415 | 168.76   | 1.662369637 |
| Acot13        | 198.19   | 119.2775 | 1.661587475 |
| Bend5         | 9.484    | 5.7095   | 1.661091164 |
| Nans          | 6.147    | 3.701    | 1.660902459 |
| Stambpl1      | 24.9065  | 15.0015  | 1.660267307 |
| Nudc          | 113.072  | 68.106   | 1.660235515 |
| Ppp1ca        | 125.7295 | 75.7405  | 1.660003565 |
| Clasrp        | 5.096    | 3.07     | 1.659934853 |
| 2310061I04Rik | 78.929   | 47.5495  | 1.659933333 |
| Clstn3        | 43.0265  | 25.9275  | 1.659492817 |
| Zkscan14      | 5.7415   | 3.462    | 1.658434431 |
| Rab40c        | 8.2045   | 4.949    | 1.657809659 |
| Myl6          | 274.0135 | 165.2895 | 1.65777923  |
| Cars2         | 5.834    | 3.5195   | 1.657621821 |
| Sap18         | 74.075   | 44.7065  | 1.656917898 |
| Spag7         | 63.2515  | 38.1795  | 1.656687489 |

|               |          |          |             |
|---------------|----------|----------|-------------|
| Bscl2         | 44.211   | 26.692   | 1.656338978 |
| Cntnap5a      | 9.2985   | 5.615    | 1.656010686 |
| Grin1         | 125.161  | 75.58    | 1.65600688  |
| 2310030N02Rik | 10.213   | 6.168    | 1.65580415  |
| Gm5633        | 2.167    | 1.3095   | 1.654830088 |
| Atp6v0b       | 117.699  | 71.152   | 1.654191028 |
| Prr13         | 64.153   | 38.7875  | 1.653960683 |
| Akr1a4        | 340.227  | 205.8285 | 1.652963511 |
| Ccn11         | 13.5935  | 8.2245   | 1.652805642 |
| 1190007I07Rik | 17.065   | 10.3285  | 1.652224428 |
| Tubg1         | 33.196   | 20.0945  | 1.651994327 |
| E2f4          | 14.8445  | 8.992    | 1.650856317 |
| Bcas3         | 10.1425  | 6.145    | 1.650528885 |
| Atg9a         | 24.9275  | 15.106   | 1.650172117 |
| Upf1          | 14.222   | 8.6185   | 1.650171143 |
| Prdx2         | 197.703  | 119.816  | 1.650055084 |
| Samd14        | 16.3175  | 9.8905   | 1.64981548  |
| Pmvk          | 51.3805  | 31.144   | 1.649772027 |
| Dnajc4        | 22.9645  | 13.926   | 1.649037771 |
| Pitpnm1       | 13.888   | 8.4315   | 1.647156496 |
| Gtf2a2        | 45.215   | 27.4505  | 1.647146682 |
| Snurf         | 13.0695  | 7.9385   | 1.646343768 |
| Bri3          | 26.3185  | 15.9925  | 1.645677661 |
| Pofut1        | 4.4395   | 2.7005   | 1.643954823 |
| Rag1ap1       | 14.097   | 8.5805   | 1.642911252 |
| Cnot8         | 16.6075  | 10.109   | 1.642843011 |
| Ebp           | 3.2145   | 1.9575   | 1.642145594 |
| Tmem90b       | 8.3705   | 5.1      | 1.64127451  |
| Fzr1          | 17.042   | 10.388   | 1.640546785 |
| Rps25         | 743.597  | 453.373  | 1.640143987 |
| 1500011H22Rik | 107.848  | 65.767   | 1.639849773 |
| Armc10        | 15.1255  | 9.2365   | 1.63757917  |
| Tmem198       | 4.282    | 2.615    | 1.637476099 |
| Cxx1a         | 44.9125  | 27.4375  | 1.63690205  |
| Med10         | 20.709   | 12.663   | 1.635394456 |
| 2700060E02Rik | 55.3365  | 33.8375  | 1.635360177 |
| Pigx          | 8.987    | 5.4975   | 1.634743065 |
| Tssc4         | 14.6275  | 8.9515   | 1.634083673 |
| Top3b         | 8.9215   | 5.461    | 1.633675151 |
| Gm8894        | 16.1305  | 9.8745   | 1.633551066 |
| Rfc3          | 9.211    | 5.64     | 1.633156028 |
| Fastk         | 21.9055  | 13.4185  | 1.632485002 |
| Trpm4         | 1.8585   | 1.1385   | 1.632411067 |
| 2810422O20Rik | 4.121    | 2.527    | 1.630787495 |
| Samd1         | 7.6675   | 4.7025   | 1.630515683 |
| Gltpd1        | 11.6     | 7.115    | 1.630358398 |
| Phf1          | 30.847   | 18.927   | 1.629788133 |
| Mdh1          | 577.9295 | 354.6965 | 1.629363414 |
| Wdyhv1        | 18.6445  | 11.4495  | 1.628411721 |
| Zfp523        | 14.886   | 9.142    | 1.628308904 |
| Ormdl1        | 3.9655   | 2.4355   | 1.62820776  |
| Lym5          | 13.4285  | 8.2535   | 1.627006724 |
| Cdc16         | 24.823   | 15.2625  | 1.626404586 |
| Tbcb          | 137.4745 | 84.5645  | 1.625676259 |
| Fam131a       | 19.367   | 11.92    | 1.624748322 |



|               |          |          |             |
|---------------|----------|----------|-------------|
| Edf1          | 584.609  | 359.8475 | 1.624602088 |
| Mcee          | 31.768   | 19.555   | 1.624546152 |
| 2410004B18Rik | 18.6285  | 11.47    | 1.624106364 |
| Hbxip         | 73.0505  | 44.993   | 1.623597004 |
| Leng1         | 4.4375   | 2.7335   | 1.623376623 |
| Pomc          | 3.992    | 2.4595   | 1.623094125 |
| Gtf2f2        | 7.062    | 4.351    | 1.623075155 |
| Sumo3         | 63.6     | 39.192   | 1.622780159 |
| Rab24         | 36.963   | 22.792   | 1.621753247 |
| 2810004N23Rik | 36.984   | 22.81    | 1.621394125 |
| Mrpl27        | 80.435   | 49.6445  | 1.620219763 |
| Jmjd8         | 21.9355  | 13.539   | 1.620171357 |
| Eif3b         | 18.9725  | 11.7105  | 1.620127236 |
| Tsg101        | 30.7695  | 18.995   | 1.619873651 |
| Pck2          | 5.5435   | 3.423    | 1.619485831 |
| Imp4          | 30.162   | 18.6245  | 1.619479718 |
| Stub1         | 49.294   | 30.4475  | 1.618983496 |
| Fam5b         | 11.1485  | 6.888    | 1.618539489 |
| Nfu1          | 70.786   | 43.7435  | 1.618206133 |
| Dda1          | 43.13    | 26.659   | 1.617840129 |
| Lym7          | 14.0925  | 8.7115   | 1.617689261 |
| Bok           | 9.368    | 5.7945   | 1.616705497 |
| Ptprz1        | 16.7855  | 10.386   | 1.616165993 |
| Hsd17b12      | 10.8265  | 6.6995   | 1.616016121 |
| Mtvr2         | 10.8835  | 6.7365   | 1.615601574 |
| rp9           | 25.317   | 15.677   | 1.614913568 |
| Alg5          | 14.1715  | 8.7795   | 1.614157982 |
| Hspa14        | 12.242   | 7.5875   | 1.613443163 |
| Fam162a       | 46.884   | 29.0585  | 1.613434967 |
| Kri1          | 14.9155  | 9.2505   | 1.61239933  |
| Cdk2ap2       | 11.452   | 7.103    | 1.612276503 |
| Rgl2          | 1.8185   | 1.128    | 1.61214539  |
| Chst12        | 7.434    | 4.6115   | 1.612056814 |
| 2310079N02Rik | 11.9215  | 7.3975   | 1.611557959 |
| Urm1          | 10.2365  | 6.3535   | 1.611159204 |
| Utp20         | 3.3795   | 2.098    | 1.610819828 |
| Usp10         | 37.2285  | 23.113   | 1.610716913 |
| Sirt5         | 9.934    | 6.1715   | 1.609657296 |
| Meig1         | 2.8265   | 1.756    | 1.609624146 |
| D10Jhu81e     | 13.5445  | 8.417    | 1.609183795 |
| Tmem59        | 76.8445  | 47.7895  | 1.60797874  |
| Rap1gap       | 33.4245  | 20.7925  | 1.607526752 |
| Armcx6        | 5.8735   | 3.655    | 1.606976744 |
| Cyb5r4        | 7.6225   | 4.7435   | 1.606935807 |
| Wdr89         | 13.5545  | 8.4365   | 1.606649677 |
| D1Bwg0212e    | 12.0605  | 7.508    | 1.606353223 |
| Cul2          | 14.8175  | 9.2255   | 1.606146008 |
| Lhpp          | 7.1255   | 4.4385   | 1.605384702 |
| Supt4h1       | 138.8505 | 86.5575  | 1.604141755 |
| Gm3362        | 6.217    | 3.876    | 1.603973168 |
| Timm8a1       | 13.4135  | 8.3665   | 1.603239108 |
| Phax          | 47.182   | 29.43    | 1.60319402  |
| Ppm1m         | 24.14    | 15.06    | 1.602921647 |
| Psmal         | 60.424   | 37.698   | 1.602843652 |
| Fuca1         | 19.7495  | 12.322   | 1.602783639 |

|               |          |          |             |
|---------------|----------|----------|-------------|
| Jakmip1       | 20.1385  | 12.5655  | 1.602681947 |
| Rcan1         | 51.336   | 32.034   | 1.602547294 |
| Deb1          | 100.7815 | 62.8895  | 1.602517113 |
| 1810043G02Rik | 16.433   | 10.2555  | 1.602359709 |
| Tle1          | 7.7695   | 4.8495   | 1.60212393  |
| Pigyl         | 37.9675  | 23.7     | 1.602004219 |
| Wdr74         | 41.277   | 25.7665  | 1.60196379  |
| Prim2         | 9.5775   | 5.9815   | 1.601186993 |
| Med21         | 64.2655  | 40.147   | 1.600754726 |
| Tspan7        | 209.477  | 130.9495 | 1.599677738 |
| Pdrg1         | 69.3845  | 43.3925  | 1.598997523 |
| Tm2d2         | 35.0675  | 21.934   | 1.598773594 |
| Caly          | 115.774  | 72.418   | 1.598690933 |
| Fam20c        | 8.4715   | 5.3015   | 1.597943978 |
| Mettl8        | 7.9465   | 4.973    | 1.597928816 |
| Rims4         | 3.179    | 1.9895   | 1.597888917 |
| Ufsp2         | 26.0955  | 16.335   | 1.597520661 |
| Mettl1        | 5.0825   | 3.1825   | 1.597014925 |
| Nme6          | 8.4555   | 5.295    | 1.596883853 |
| Klc2          | 58.1185  | 36.3975  | 1.596771756 |
| Slc39a7       | 19.345   | 12.131   | 1.5946748   |
| Tbc1d25       | 10.4805  | 6.576    | 1.59375     |
| Gm6988        | 2.854    | 1.7915   | 1.593078426 |
| Phf5a         | 34.3045  | 21.545   | 1.592225574 |
| Higd1a        | 74.9685  | 47.086   | 1.592161152 |
| Zfp213        | 1.896    | 1.191    | 1.591939547 |
| Tfpt          | 25.493   | 16.0145  | 1.591869868 |
| Gap43         | 1380.721 | 867.6385 | 1.591355155 |
| Nr2f1         | 7.8075   | 4.9065   | 1.591256496 |
| Plk1s1        | 16.003   | 10.0575  | 1.591150882 |
| Mthfsd        | 4.754    | 2.989    | 1.590498494 |
| Dcps          | 12.6015  | 7.9235   | 1.590395658 |
| Pycl          | 12.325   | 7.75     | 1.590322581 |
| Zfp622        | 16.302   | 10.251   | 1.590283875 |
| Pma5          | 132.9445 | 83.602   | 1.590207172 |
| Prpf19        | 125.458  | 78.907   | 1.58994766  |
| Ttc30a1       | 3.9055   | 2.4565   | 1.589863627 |
| C1galt1c1     | 11.44    | 7.2025   | 1.588337383 |
| Pldn          | 16.8505  | 10.611   | 1.588021864 |
| Tmem59l       | 114.613  | 72.2035  | 1.587360724 |
| Tmem159       | 8.709    | 5.487    | 1.587206124 |
| Sf3b3         | 19.7775  | 12.4665  | 1.586451691 |
| Ftsjd1        | 2.328    | 1.468    | 1.585831063 |
| Ndufb9        | 173.7215 | 109.552  | 1.585744669 |
| Tmem62        | 4.56     | 2.876    | 1.585535466 |
| Rnf112        | 24.815   | 15.6535  | 1.58526847  |
| Nubpl         | 4.7005   | 2.966    | 1.584794336 |
| Hap1          | 138.108  | 87.1515  | 1.584688732 |
| Lcmt1         | 62.1475  | 39.227   | 1.584304178 |
| Rgs9          | 12.667   | 7.996    | 1.584167084 |
| Atp6v1g1      | 126.7275 | 80.013   | 1.583836377 |
| Exosc6        | 6.9115   | 4.364    | 1.583753437 |
| Hn1           | 50.404   | 31.847   | 1.582692247 |
| Zfp688        | 4.428    | 2.7995   | 1.581711102 |
| Tmem126b      | 33.7735  | 21.3615  | 1.581045339 |

|               |          |          |             |
|---------------|----------|----------|-------------|
| Thap1         | 8.0925   | 5.1195   | 1.580720774 |
| Hax1          | 73.5605  | 46.541   | 1.580552631 |
| Gm10086       | 7.733    | 4.8945   | 1.579936664 |
| Camk2n2       | 144.4645 | 91.5215  | 1.578476096 |
| Mettl6        | 17.288   | 10.9545  | 1.578164225 |
| Zfp414        | 105.7955 | 67.0545  | 1.577753917 |
| Rassf5        | 18.256   | 11.5765  | 1.576987863 |
| Gstm4         | 6.5455   | 4.152    | 1.576469171 |
| Parl          | 25.403   | 16.1145  | 1.576406342 |
| LOC100503185  | 2.0635   | 1.309    | 1.576394194 |
| Ctps          | 15.9935  | 10.146   | 1.576335502 |
| Pom121        | 44.834   | 28.442   | 1.576330778 |
| Trappc2       | 23.267   | 14.764   | 1.575927933 |
| Unc45a        | 5.02     | 3.1865   | 1.575396203 |
| Nppc          | 5.111    | 3.2475   | 1.57382602  |
| Gm5528        | 5.9675   | 3.792    | 1.573707806 |
| Etfb          | 72.0165  | 45.7635  | 1.573666787 |
| Hbs1l         | 27.77    | 17.6485  | 1.57350483  |
| Krt1          | 26.9435  | 17.128   | 1.573067492 |
| Vps4a         | 48.853   | 31.0575  | 1.572985591 |
| Aes           | 124.989  | 79.4885  | 1.572416136 |
| Mapkapk5      | 9.389    | 5.9745   | 1.57151226  |
| Ikbkap        | 11.996   | 7.6335   | 1.571494072 |
| Polr2e        | 44.49    | 28.3155  | 1.571224241 |
| Glt1d1        | 4.428    | 2.8185   | 1.57104843  |
| Fam100b       | 14.526   | 9.2465   | 1.570972801 |
| Zfp13         | 5.096    | 3.246    | 1.569932224 |
| Gm7866        | 9.905    | 6.3155   | 1.56836355  |
| Fasn          | 29.085   | 18.554   | 1.567586504 |
| Tceal3        | 126.045  | 80.4095  | 1.567538661 |
| Thoc3         | 26.94    | 17.19    | 1.567190227 |
| Lsm2          | 54.9125  | 35.076   | 1.565529137 |
| Rplp1         | 711.495  | 454.4855 | 1.565495489 |
| Trim28        | 49.8375  | 31.837   | 1.565395609 |
| Kdelr1        | 23.71    | 15.155   | 1.564500165 |
| Paqr4         | 14.1775  | 9.0685   | 1.563378729 |
| Dtnb          | 19.9465  | 12.761   | 1.563082831 |
| Vwa5b2        | 9.249    | 5.9175   | 1.562991128 |
| 2210016L21Rik | 185.798  | 118.896  | 1.562693446 |
| Tmem14a       | 21.032   | 13.4665  | 1.561801507 |
| Dyrk3         | 3.6835   | 2.3585   | 1.561797753 |
| Polr1d        | 158.5635 | 101.547  | 1.561478921 |
| 1700020C11Rik | 55.583   | 35.5995  | 1.561342154 |
| LOC100503815  | 25.5285  | 16.3565  | 1.560755663 |
| Myg1          | 29.539   | 18.9265  | 1.560721739 |
| Ahsa1         | 97.435   | 62.4475  | 1.560270627 |
| 5730494M16Rik | 31.082   | 19.9235  | 1.560067257 |
| Snape5        | 23.763   | 15.2345  | 1.559814894 |
| Cfdp1         | 160.3625 | 102.8245 | 1.55957481  |
| 2310016C08Rik | 4.6365   | 2.973    | 1.559535822 |
| Deaf121l      | 17.561   | 11.2615  | 1.559383741 |
| Dnttip1       | 15.4705  | 9.9225   | 1.559133283 |
| Gm14176       | 8.0725   | 5.1785   | 1.558849088 |
| Flii          | 30.6615  | 19.6915  | 1.557093162 |
| Esrra         | 4.4145   | 2.836    | 1.556593794 |

|               |           |          |             |
|---------------|-----------|----------|-------------|
| Clcn6         | 32.0925   | 20.619   | 1.556452786 |
| 6330403K07Rik | 1242.2925 | 799.239  | 1.554344195 |
| LOC100503409  | 12.274    | 7.897    | 1.554261112 |
| Rnps1         | 170.7985  | 109.9195 | 1.553850773 |
| Tnfrsf19      | 2.068     | 1.331    | 1.553719008 |
| Fam69b        | 31.0745   | 20.0215  | 1.552056539 |
| Adcy2         | 13.152    | 8.4745   | 1.551949968 |
| Pcyox11       | 4.5665    | 2.943    | 1.551647978 |
| Cyc1          | 194.663   | 125.4775 | 1.551377737 |
| Tekt2         | 4.2075    | 2.7135   | 1.550580431 |
| Tmbim4        | 30.934    | 19.9545  | 1.550226766 |
| AW551984      | 39.4185   | 25.4465  | 1.549073546 |
| Hs3st2        | 4.665     | 3.013    | 1.54829074  |
| Txnrd2        | 4.076     | 2.634    | 1.54745634  |
| Tceal5        | 136.5885  | 88.267   | 1.547446951 |
| Nup107        | 6.029     | 3.897    | 1.547087503 |
| Ssr2          | 35.4965   | 22.952   | 1.546553677 |
| Ntn4          | 1.8505    | 1.197    | 1.545948204 |
| Ethe1         | 24.178    | 15.6435  | 1.545562055 |
| Gls2          | 5.3205    | 3.4425   | 1.545533769 |
| Hbq1          | 1.662     | 1.0755   | 1.545327755 |
| Bod1          | 102.7725  | 66.5505  | 1.544278405 |
| Adam15        | 13.5755   | 8.7955   | 1.543459724 |
| Pcdhgb4       | 1.645     | 1.066    | 1.54315197  |
| Slc25a14      | 33.2345   | 21.5465  | 1.542454691 |
| Chmp2b        | 26.793    | 17.372   | 1.542309464 |
| Drg2          | 27.6365   | 17.9195  | 1.542258434 |
| Eif3d         | 58.181    | 37.7255  | 1.542219454 |
| Pcyt2         | 11.986    | 7.7745   | 1.541706862 |
| Gm16379       | 2.432     | 1.578    | 1.541191382 |
| Chrna7        | 7.729     | 5.0165   | 1.540715638 |
| Spsb2         | 2.719     | 1.765    | 1.540509915 |
| Magee1        | 72.225    | 46.8935  | 1.540192138 |
| Csmd1         | 4.3055    | 2.796    | 1.539878398 |
| Rbx1          | 130.8335  | 84.9695  | 1.539770153 |
| Zbtb8os       | 16.3725   | 10.635   | 1.539492243 |
| Dhx9          | 22.638    | 14.707   | 1.539267016 |
| Ints7         | 4.5825    | 2.9785   | 1.538526104 |
| Rpl24         | 725.855   | 471.835  | 1.538366166 |
| Rnf19b        | 26.511    | 17.2345  | 1.538251762 |
| Pgbd1         | 1.882     | 1.224    | 1.537581699 |
| Zswim1        | 20.76     | 13.513   | 1.536298379 |
| Gm15450       | 259.3375  | 168.8605 | 1.535809144 |
| Sec11c        | 33.8935   | 22.0735  | 1.535483725 |
| Tro           | 40.1175   | 26.1365  | 1.534922426 |
| Nup62-il4i1   | 3.139     | 2.0455   | 1.53458812  |
| Fam40b        | 2.99      | 1.9485   | 1.534513729 |
| Pqlc1         | 5.1055    | 3.3275   | 1.534335086 |
| Iqsec2        | 10.9075   | 7.109    | 1.53432269  |
| Gnb5          | 41.459    | 27.023   | 1.534211598 |
| Lta4h         | 16.667    | 10.864   | 1.534149485 |
| Evpl          | 2.8025    | 1.827    | 1.533935413 |
| Gsbs          | 3.327     | 2.1695   | 1.533533072 |
| Atp5sl        | 22.0335   | 14.3705  | 1.53324519  |
| Fbxo16        | 13.103    | 8.5475   | 1.532962855 |

|               |          |          |             |
|---------------|----------|----------|-------------|
| Gm7429        | 2.4035   | 1.5685   | 1.532355754 |
| Hdac6         | 6.993    | 4.569    | 1.530531845 |
| 6430527G18Rik | 13.1795  | 8.6135   | 1.530098102 |
| Aph1a         | 3.251    | 2.125    | 1.529882353 |
| Psmb10        | 48.685   | 31.829   | 1.529579943 |
| Spryd3        | 54.0435  | 35.3365  | 1.52939595  |
| Zfp422-rs1    | 5.079    | 3.323    | 1.528438158 |
| Usp21         | 20.8325  | 13.637   | 1.527645377 |
| Tctex1d2      | 43.7405  | 28.637   | 1.527412089 |
| Maged1        | 595.0535 | 389.667  | 1.527082098 |
| Rpl8          | 329.6675 | 215.939  | 1.526669569 |
| Mllt1         | 9.553    | 6.258    | 1.526526047 |
| Tmem9         | 59.492   | 38.977   | 1.526336044 |
| Fkbp8         | 105.5075 | 69.1305  | 1.52620768  |
| Prkrip1       | 30.594   | 20.0485  | 1.525999451 |
| Nkg7          | 4.6145   | 3.024    | 1.525958995 |
| Vta1          | 37.7275  | 24.7315  | 1.525483695 |
| Wbp5          | 101.8665 | 66.782   | 1.52535863  |
| Tsen15        | 16.2985  | 10.6865  | 1.525148552 |
| Slc1a6        | 4.422    | 2.9      | 1.524827586 |
| 1500009C09Rik | 87.58    | 57.4425  | 1.52465509  |
| Zfp358        | 11.7135  | 7.686    | 1.524004684 |
| Ccdc101       | 19.4145  | 12.7415  | 1.523721697 |
| Meis3         | 26.921   | 17.669   | 1.523628955 |
| Rpl36a        | 331.877  | 217.8225 | 1.523612115 |
| Mtch2         | 27.605   | 18.119   | 1.523538827 |
| Slc45a1       | 17.22    | 11.303   | 1.523489339 |
| Bad           | 22.773   | 14.9505  | 1.523226648 |
| Hdac3         | 24.345   | 15.9935  | 1.522180886 |
| 3110002H16Rik | 15.065   | 9.9035   | 1.521179381 |
| Hspa9         | 60.535   | 39.7985  | 1.521037225 |
| 0610007P14Rik | 56.566   | 37.2085  | 1.52024403  |
| 6720456B07Rik | 127.5525 | 83.9625  | 1.519160339 |
| Rpl18         | 369.0465 | 242.9735 | 1.518875515 |
| Gm8210        | 14.8655  | 9.792    | 1.518127042 |
| Slc8a2        | 9.983    | 6.576    | 1.518096107 |
| AI118078      | 1.578    | 1.0395   | 1.518037518 |
| Cd83          | 22.4685  | 14.8065  | 1.517475433 |
| Gpr63         | 1.96     | 1.292    | 1.517027864 |
| 3110082D06Rik | 1.9235   | 1.268    | 1.516955836 |
| Btg1          | 8.688    | 5.73     | 1.516230366 |
| Hspa11        | 3.582    | 2.3635   | 1.515548974 |
| Fry           | 28.7485  | 18.972   | 1.515312039 |
| Magee2        | 65.537   | 43.264   | 1.514816013 |
| Chmp5         | 88.874   | 58.729   | 1.513289857 |
| Paip2         | 170.7485 | 112.837  | 1.513231475 |
| Mrps11        | 20.468   | 13.5275  | 1.513065977 |
| Aen           | 18.5935  | 12.2895  | 1.512958216 |
| Alg1          | 2.025    | 1.3385   | 1.512887561 |
| Brms1         | 10.8445  | 7.1685   | 1.512799051 |
| Ubb           | 1700.11  | 1123.872 | 1.512725648 |
| Snrnp200      | 27.9005  | 18.4485  | 1.512345177 |
| Vdac3         | 166.4475 | 110.072  | 1.512169307 |
| 2310003L22Rik | 23.936   | 15.832   | 1.511874684 |
| Srprb         | 10.9925  | 7.272    | 1.511619912 |

|               |          |          |             |
|---------------|----------|----------|-------------|
| Hn11          | 8.1415   | 5.386    | 1.511604159 |
| Med9          | 27.2125  | 18.0145  | 1.510588692 |
| Zdhhc8        | 12.861   | 8.5145   | 1.510482119 |
| Cdc42         | 108.286  | 71.7095  | 1.510064915 |
| Mrps26        | 39.0695  | 25.8845  | 1.509378199 |
| Pdss2         | 8.778    | 5.8185   | 1.508636246 |
| Rsl1d1        | 105.1445 | 69.7155  | 1.508194017 |
| Gm10073       | 96.02    | 63.692   | 1.507567669 |
| Kcnq5         | 7.1485   | 4.742    | 1.507486293 |
| Rps13         | 474.281  | 314.6465 | 1.507345545 |
| Pigp          | 33.0295  | 21.9145  | 1.50719843  |
| Eif4g1        | 39.627   | 26.305   | 1.506443642 |
| Eid2          | 24.0065  | 15.9365  | 1.506384714 |
| Aurkaip1      | 149.279  | 99.125   | 1.505967213 |
| Pla2g12a      | 13.457   | 8.9455   | 1.504331787 |
| Nmd3          | 13.2355  | 8.7985   | 1.504290504 |
| Ppp1r8        | 37.091   | 24.658   | 1.504217698 |
| Mrps14        | 48.5115  | 32.2555  | 1.503976066 |
| Chmp2a        | 108.6455 | 72.2805  | 1.503109414 |
| Klhl22        | 36.174   | 24.0665  | 1.503085201 |
| Polh          | 2.094    | 1.3935   | 1.502691066 |
| Lmna          | 5.9105   | 3.9335   | 1.502605822 |
| Rasgrf1       | 297.604  | 198.1395 | 1.501992283 |
| Alg14         | 10.2155  | 6.8025   | 1.501727306 |
| Galk2         | 9.628    | 6.413    | 1.501325433 |
| Lpcat3        | 5.7385   | 3.823    | 1.501046299 |
| Nsmce1        | 14.0085  | 9.3335   | 1.500883913 |
| Chic2         | 8.377    | 5.584    | 1.500179083 |
| Gstm5         | 137.5375 | 91.704   | 1.499798264 |
| Edc4          | 6.7855   | 4.526    | 1.49922669  |
| Gdf1          | 14.4635  | 9.648    | 1.499118988 |
| Psm10         | 27.479   | 18.3305  | 1.499086222 |
| Phyh          | 71.771   | 47.9185  | 1.497772259 |
| Agk           | 15.485   | 10.342   | 1.497292593 |
| Chrm1         | 2.938    | 1.9625   | 1.497070064 |
| Tmem41a       | 22.613   | 15.1055  | 1.497004402 |
| Brsk1         | 20.567   | 13.739   | 1.496979402 |
| Tbc1d22a      | 5.673    | 3.79     | 1.496833773 |
| Gtf2h5        | 58.764   | 39.268   | 1.496485688 |
| Mad2l2        | 22.1495  | 14.805   | 1.496082405 |
| Ctxn1         | 298.854  | 199.848  | 1.495406509 |
| Vps11         | 21.71    | 14.518   | 1.495385039 |
| Prmt2         | 89.1465  | 59.6185  | 1.495282505 |
| Arl10         | 32.971   | 22.065   | 1.494266939 |
| Ankdd1b       | 4.0505   | 2.711    | 1.494098119 |
| Peci          | 26.8095  | 17.944   | 1.494064868 |
| Scaf1         | 20.8385  | 13.95    | 1.493799283 |
| Meis1         | 3.0605   | 2.049    | 1.493655442 |
| Sarnp         | 25.1875  | 16.866   | 1.493389067 |
| Fam108a       | 14.946   | 10.0125  | 1.492734082 |
| Ube2j2        | 11.4305  | 7.6575   | 1.492719556 |
| Dus3l         | 23.2175  | 15.555   | 1.492606879 |
| Jrk           | 2.965    | 1.9865   | 1.49257488  |
| Pelo          | 10.8845  | 7.2955   | 1.491947091 |
| 1700066J24Rik | 145.4475 | 97.5045  | 1.491700383 |

|               |          |          |             |
|---------------|----------|----------|-------------|
| Chmp1a        | 18.903   | 12.688   | 1.489832913 |
| Ccdc59        | 50.286   | 33.753   | 1.489823127 |
| Pno1          | 6.618    | 4.4435   | 1.48936649  |
| Rplp0         | 82.451   | 55.3675  | 1.489158803 |
| Uqcc          | 17.5985  | 11.8195  | 1.488937772 |
| MsrB2         | 8.3025   | 5.579    | 1.488169923 |
| Ddx18         | 22.1705  | 14.9005  | 1.487903091 |
| Ppp2ca        | 94.248   | 63.3505  | 1.487723065 |
| Zc3h15        | 62.0075  | 41.687   | 1.487454122 |
| Atp6v0e2      | 103.2915 | 69.4695  | 1.486861141 |
| Tmem85        | 126.043  | 84.7815  | 1.486680467 |
| 3010026O09Rik | 44.253   | 29.777   | 1.486147026 |
| Il15ra        | 2.2965   | 1.5455   | 1.485926885 |
| Xpnpep1       | 16.2285  | 10.9245  | 1.485514211 |
| Eif3m         | 64.922   | 43.707   | 1.485391356 |
| Gm5445        | 1.677    | 1.129    | 1.485385297 |
| Tjap1         | 2.0455   | 1.3785   | 1.483859267 |
| Tmem22        | 9.2895   | 6.2605   | 1.48382717  |
| Eef1e1        | 25.841   | 17.4225  | 1.483197015 |
| Cdk12         | 17.518   | 11.82    | 1.482064298 |
| PsmB7         | 178.6495 | 120.555  | 1.481892082 |
| H47           | 23.532   | 15.883   | 1.481584084 |
| Klhl34        | 5.7715   | 3.896    | 1.48139117  |
| Cib2          | 41.0285  | 27.709   | 1.480692194 |
| 1110034G24Rik | 2.918    | 1.971    | 1.480466768 |
| Trim8         | 32.8865  | 22.215   | 1.480373621 |
| Cetn4         | 5.1865   | 3.504    | 1.480165525 |
| Mllt11        | 226.8925 | 153.29   | 1.480151999 |
| Mrp117        | 16.224   | 10.9615  | 1.480089404 |
| Bloc1s1       | 146.0525 | 98.6945  | 1.479844368 |
| Cant1         | 10.8505  | 7.335    | 1.479277437 |
| Nckap5l       | 2.433    | 1.645    | 1.479027356 |
| Phka2         | 5.106    | 3.4535   | 1.478500072 |
| Cspg5         | 22.3545  | 15.12    | 1.478472222 |
| Rsl24d1       | 75.6555  | 51.1825  | 1.478151712 |
| Gm10146       | 83.8365  | 56.723   | 1.477998343 |
| 3230401D17Rik | 9.581    | 6.4825   | 1.477979175 |
| Bex2          | 829.5795 | 561.3945 | 1.477712197 |
| Dctn5         | 102.1915 | 69.1595  | 1.477620573 |
| IscA1         | 120.694  | 81.6855  | 1.477544974 |
| Lsm3          | 25.7705  | 17.4435  | 1.477369794 |
| Atp6v1e1      | 184.166  | 124.668  | 1.47725158  |
| Kcns2         | 1.746    | 1.182    | 1.47715736  |
| Mrps18b       | 20.4025  | 13.8185  | 1.476462713 |
| Nat15         | 40.5535  | 27.467   | 1.476444461 |
| Necab3        | 40.0335  | 27.118   | 1.476270374 |
| Stx8          | 6.2675   | 4.246    | 1.476095148 |
| Eif2ak4       | 4.8275   | 3.271    | 1.475848364 |
| Gpr3          | 6.144    | 4.1635   | 1.475681518 |
| Rnf34         | 45.428   | 30.787   | 1.475557865 |
| Lztr1         | 25.5905  | 17.3515  | 1.474829265 |
| Tubg2         | 44.545   | 30.205   | 1.474755835 |
| Cops8         | 45.093   | 30.5855  | 1.47432607  |
| Ctr9          | 11.816   | 8.015    | 1.474235808 |
| Polk          | 7.3775   | 5.0045   | 1.474173244 |

|               |          |          |             |
|---------------|----------|----------|-------------|
| Eif3i         | 159.3475 | 108.1395 | 1.473536497 |
| Bzw2          | 11.3805  | 7.7235   | 1.473489998 |
| Tor1a         | 16.267   | 11.044   | 1.472926476 |
| LOC100504639  | 5.2375   | 3.556    | 1.472862767 |
| Sorcs1        | 9.2215   | 6.2645   | 1.472024902 |
| Atg13         | 49.1825  | 33.4115  | 1.472023106 |
| Schip1        | 83.886   | 57.003   | 1.471606758 |
| Gdap111       | 33.7795  | 22.962   | 1.471104433 |
| 2700050L05Rik | 6.701    | 4.556    | 1.470807726 |
| Rara          | 12.456   | 8.469    | 1.47077577  |
| Hmgn4         | 9.673    | 6.577    | 1.470731336 |
| Immt          | 61.439   | 41.795   | 1.470008374 |
| Dmp1          | 2.764    | 1.8805   | 1.469821856 |
| Zfp672        | 8.169    | 5.562    | 1.468716289 |
| Nt5c          | 51.4875  | 35.0625  | 1.468449198 |
| Msl3          | 6.031    | 4.109    | 1.467753711 |
| Kdm4b         | 3.894    | 2.6535   | 1.46749576  |
| Dmrtb1        | 3.2345   | 2.2045   | 1.467226128 |
| Fbl           | 64.0545  | 43.6595  | 1.467137736 |
| Tmem87a       | 8.7295   | 5.9505   | 1.467019578 |
| Abcb8         | 18.0585  | 12.31    | 1.466978067 |
| Psma3         | 101.6925 | 69.3735  | 1.465869532 |
| Sub1          | 113.4975 | 77.466   | 1.465126636 |
| Apc2          | 9.8115   | 6.697    | 1.465058982 |
| LOC100502777  | 2.369    | 1.617    | 1.465058751 |
| Exosc4        | 18.665   | 12.7425  | 1.464783206 |
| Cln5          | 9.558    | 6.5265   | 1.464490922 |
| Grp           | 5.7945   | 3.957    | 1.464366945 |
| Mrp115        | 13.0455  | 8.909    | 1.464305758 |
| Naa20         | 25.15    | 17.178   | 1.464081965 |
| Pth2          | 11.197   | 7.652    | 1.463277574 |
| Mis12         | 8.935    | 6.1075   | 1.462955383 |
| Gm4769        | 4.026    | 2.7525   | 1.4626703   |
| Ost4          | 272.846  | 186.545  | 1.46262832  |
| Taf6l         | 5.3245   | 3.6405   | 1.462573822 |
| Slit2         | 8.2025   | 5.6085   | 1.462512258 |
| Ar            | 17.5355  | 11.9915  | 1.462327482 |
| Tmem70        | 23.7065  | 16.221   | 1.4614697   |
| Fahd1         | 23.3765  | 15.996   | 1.461396599 |
| BC068281      | 8.658    | 5.927    | 1.460772735 |
| Gpc4          | 5.8035   | 3.973    | 1.460734961 |
| Snx2          | 50.4345  | 34.527   | 1.460726388 |
| Akl           | 23.4745  | 16.079   | 1.459947758 |
| Plxdc1        | 4.7715   | 3.2685   | 1.459843965 |
| Mll3          | 17.97    | 12.315   | 1.459196102 |
| Cabin1        | 8.9755   | 6.1525   | 1.458837871 |
| Gpr12         | 14.074   | 9.6475   | 1.458823529 |
| Trfr2         | 2.5985   | 1.7815   | 1.458602301 |
| Bccip         | 55.883   | 38.314   | 1.458553009 |
| Ldb1          | 40.4975  | 27.7725  | 1.458187056 |
| Pde1b         | 33.4095  | 22.92    | 1.457657068 |
| Mcts1         | 23.2775  | 15.971   | 1.457485442 |
| Gucy1b3       | 25.525   | 17.5165  | 1.4571975   |
| Tspan13       | 51.153   | 35.115   | 1.456727894 |
| Htatsf1       | 45.6715  | 31.353   | 1.45668676  |



|               |           |          |             |
|---------------|-----------|----------|-------------|
| Rrp8          | 5.151     | 3.5365   | 1.456524813 |
| Vrk1          | 9.3845    | 6.4435   | 1.456428959 |
| Efhd2         | 125.5805  | 86.2325  | 1.456301279 |
| Snrpn         | 1157.3745 | 794.745  | 1.456284091 |
| Tmem9b        | 40.609    | 27.895   | 1.455780606 |
| Acbd6         | 30.4945   | 20.9515  | 1.455480515 |
| Ddx23         | 35.3675   | 24.308   | 1.454973671 |
| Grpel1        | 15.7585   | 10.831   | 1.454944142 |
| Qtrt1         | 11.7665   | 8.0895   | 1.454539836 |
| Atp6v0a2      | 11.5575   | 7.9475   | 1.45423089  |
| Slc25a39      | 38.9435   | 26.8145  | 1.452329896 |
| Rps24         | 660.387   | 454.7535 | 1.452186734 |
| Diablo        | 12.9785   | 8.941    | 1.451571413 |
| Tut1          | 8.6585    | 5.9675   | 1.450942606 |
| Tmem35        | 29.35     | 20.233   | 1.450600504 |
| Dus4l         | 3.1025    | 2.139    | 1.450444133 |
| Rnaseh2a      | 11.0315   | 7.6075   | 1.450082156 |
| Cenpq         | 2.4135    | 1.665    | 1.44954955  |
| Zcchc17       | 60.792    | 41.9395  | 1.449516566 |
| Sema4g        | 8.2125    | 5.6735   | 1.447519168 |
| Gm5151        | 5.698     | 3.9365   | 1.447478725 |
| Ppp5c         | 46.9215   | 32.4185  | 1.447368015 |
| Tusc3         | 53.5965   | 37.0445  | 1.446813967 |
| Dnlz          | 12.169    | 8.4115   | 1.446709862 |
| Epha10        | 12.2315   | 8.4555   | 1.446573236 |
| Il1rap1l      | 3.8115    | 2.635    | 1.446489564 |
| Hs3st5        | 3.481     | 2.407    | 1.446198587 |
| Tubb2a        | 312.5125  | 216.093  | 1.446194463 |
| C85492        | 21.489    | 14.8595  | 1.446145563 |
| Gng10         | 27.5095   | 19.0375  | 1.445016415 |
| Samd12        | 10.957    | 7.583    | 1.444942635 |
| Gmpr2         | 11.552    | 7.996    | 1.444722361 |
| Ing2          | 7.2085    | 4.9905   | 1.444444444 |
| Rps18         | 298.015   | 206.4115 | 1.44379068  |
| Creb3l2       | 5.9275    | 4.107    | 1.443267592 |
| Mxra7         | 7.985     | 5.535    | 1.44263776  |
| Entpd4        | 35.2255   | 24.424   | 1.442249427 |
| Eif6          | 31.2755   | 21.69    | 1.441931766 |
| Aifm1         | 8.665     | 6.011    | 1.441523873 |
| Sumo1         | 128.253   | 89.0255  | 1.440632178 |
| Sdhc          | 186.605   | 129.537  | 1.440553664 |
| Atpaf1        | 49.2355   | 34.1795  | 1.440497959 |
| 0610031J06Rik | 16.5325   | 11.477   | 1.440489675 |
| BC049349      | 6.9225    | 4.8085   | 1.439638141 |
| 1110037F02Rik | 5.897     | 4.0965   | 1.439521543 |
| Pcdhga7       | 7.8355    | 5.4435   | 1.439423165 |
| Cops7a        | 141.057   | 97.997   | 1.439401206 |
| Dedd          | 15.5045   | 10.772   | 1.439333457 |
| Ywhah         | 756.927   | 526.1185 | 1.438700597 |
| Paqr9         | 21.14     | 14.699   | 1.438193074 |
| Ccdc92        | 183.491   | 127.6055 | 1.437955261 |
| Jund          | 13.291    | 9.245    | 1.437641969 |
| Sybu          | 27.4155   | 19.0705  | 1.437586849 |
| Ccdc53        | 16.906    | 11.7675  | 1.436668791 |
| Pfkl          | 19.2925   | 13.4315  | 1.436362283 |

|               |          |          |             |
|---------------|----------|----------|-------------|
| Tspan31       | 45.0125  | 31.345   | 1.436034455 |
| Tbc1d17       | 10.511   | 7.3195   | 1.436027051 |
| AI837181      | 44.3225  | 30.8725  | 1.435662807 |
| Morf4l2       | 146.5825 | 102.1595 | 1.434839638 |
| Gad1          | 86.4005  | 60.2225  | 1.434688032 |
| Rfesd         | 7.794    | 5.434    | 1.43430254  |
| Smyd2         | 57.925   | 40.397   | 1.433893606 |
| Creb3         | 20.436   | 14.2545  | 1.433652531 |
| Snx21         | 5.812    | 4.0545   | 1.433468985 |
| Tfb2m         | 31.044   | 21.6585  | 1.433340259 |
| S100a10       | 53.654   | 37.447   | 1.432798355 |
| Jazf1         | 18.385   | 12.838   | 1.432076647 |
| Gar1          | 31.2595  | 21.833   | 1.431754683 |
| Spty2d1       | 10.7095  | 7.48     | 1.431751337 |
| Drg1          | 39.557   | 27.6295  | 1.431694385 |
| Tomm20        | 68.9955  | 48.2     | 1.431441909 |
| Isca2         | 88.939   | 62.1505  | 1.431026299 |
| Taf9          | 51.398   | 35.9535  | 1.429568749 |
| Cebpb         | 1.5735   | 1.101    | 1.429155313 |
| Tm9sf2        | 22.5455  | 15.776   | 1.429101166 |
| Kctd2         | 41.2105  | 28.8375  | 1.429059384 |
| Hist1h2ak     | 7.967    | 5.5765   | 1.428673899 |
| Nfyc          | 18.5115  | 12.9575  | 1.428632066 |
| Kctd13        | 96.829   | 67.794   | 1.428282739 |
| Fam196a       | 28.916   | 20.259   | 1.427316255 |
| Zbtb37        | 1.9595   | 1.373    | 1.427166788 |
| Plec          | 4.4645   | 3.1285   | 1.427041713 |
| Ckap5         | 29.7475  | 20.8615  | 1.425952113 |
| Klhdc4        | 8.2955   | 5.821    | 1.42509878  |
| Noc4l         | 7.5215   | 5.2785   | 1.424931325 |
| Kenmb4        | 11.712   | 8.2195   | 1.424904191 |
| Lym4          | 56.8585  | 39.9035  | 1.424900071 |
| BC027344      | 5.395    | 3.7865   | 1.424798627 |
| Odz2          | 26.986   | 18.9425  | 1.424627161 |
| Copz1         | 63.0385  | 44.2515  | 1.42455058  |
| Slc45a4       | 6.1455   | 4.3145   | 1.424382895 |
| Uxs1          | 12.299   | 8.635    | 1.424319629 |
| Ufc1          | 60.626   | 42.5665  | 1.424265561 |
| Stox1         | 1.6055   | 1.1275   | 1.423946785 |
| Sri           | 24.4565  | 17.1775  | 1.423752001 |
| Fam126a       | 5.1785   | 3.638    | 1.423446949 |
| Zdhhc6        | 7.0765   | 4.9725   | 1.4231272   |
| Kcnq2         | 52.0405  | 36.5685  | 1.423096381 |
| Slc33a1       | 5.1405   | 3.6125   | 1.422975779 |
| Gm13213       | 1.7865   | 1.256    | 1.422372611 |
| Ap3d1         | 29.727   | 20.9005  | 1.422310471 |
| Sec22a        | 2.364    | 1.663    | 1.42152736  |
| Cacna1b       | 12.2565  | 8.632    | 1.419891103 |
| Rdh10         | 3.157    | 2.2235   | 1.419833596 |
| Thsd7b        | 3.326    | 2.3435   | 1.419244719 |
| Sin3b         | 29.604   | 20.862   | 1.419039402 |
| Mrps25        | 11.5865  | 8.1665   | 1.418784057 |
| 2310067B10Rik | 7.708    | 5.434    | 1.418476261 |
| Ercc2         | 4.311    | 3.0415   | 1.417392734 |
| Prc           | 20.575   | 14.517   | 1.417303851 |

|               |          |          |             |
|---------------|----------|----------|-------------|
| Ralb          | 10.9945  | 7.758    | 1.417182263 |
| Aqr           | 10.53    | 7.4315   | 1.416941398 |
| Slitrk4       | 11.357   | 8.018    | 1.416438014 |
| Sft2d1        | 22.711   | 16.037   | 1.416162624 |
| Nme7          | 131.989  | 93.212   | 1.416008668 |
| Adcy8         | 4.272    | 3.0185   | 1.415272486 |
| Dmap1         | 26.805   | 18.946   | 1.414810514 |
| Dis3          | 2.5645   | 1.813    | 1.414506343 |
| Nkiras1       | 34.252   | 24.2275  | 1.413765349 |
| A730017C20Rik | 162.5595 | 115.007  | 1.413474832 |
| AI480653      | 5.658    | 4.004    | 1.413086913 |
| Spats1        | 4.2345   | 2.9975   | 1.412677231 |
| Gfer          | 19.6565  | 13.9215  | 1.411952735 |
| Map2k2        | 12.685   | 8.985    | 1.41179744  |
| Junb          | 3.0985   | 2.195    | 1.411617312 |
| Srf           | 10.0345  | 7.109    | 1.411520608 |
| Dolk          | 5.378    | 3.8115   | 1.410993047 |
| Fbxw4         | 4.1475   | 2.9395   | 1.410954244 |
| ORF61         | 13.775   | 9.7705   | 1.4098562   |
| Khdrbs3       | 36.3615  | 25.7955  | 1.409606327 |
| Tmem130       | 152.606  | 108.296  | 1.409156386 |
| Nup88         | 29.892   | 21.2155  | 1.408969857 |
| Gm12508       | 2.093    | 1.4855   | 1.408953214 |
| Rltpr         | 11.763   | 8.349    | 1.408911247 |
| Obfc2b        | 184.8495 | 131.2305 | 1.408586419 |
| Wbp2          | 217.273  | 154.263  | 1.408458282 |
| Ass1          | 129.0915 | 91.6595  | 1.408381019 |
| Prpf40b       | 14.109   | 10.019   | 1.408224374 |
| Arl6ip1       | 158.738  | 112.7385 | 1.408019443 |
| Dhodh         | 8.964    | 6.37     | 1.40722135  |
| Atp6v1h       | 50.086   | 35.607   | 1.406633527 |
| Faah          | 5.6615   | 4.025    | 1.406583851 |
| Sema6c        | 2.1005   | 1.494    | 1.405957162 |
| Hs6st1        | 10.7695  | 7.6605   | 1.405848182 |
| Stx1a         | 11.5265  | 8.201    | 1.405499329 |
| Znhit2-ps     | 13.8185  | 9.832    | 1.405461758 |
| Aspscr1       | 15.482   | 11.0175  | 1.40521897  |
| Cd320         | 6.1645   | 4.3895   | 1.404374075 |
| Gadd45b       | 3.319    | 2.3635   | 1.404273323 |
| Nudcd2        | 5.4695   | 3.896    | 1.40387577  |
| Fads3         | 6.8155   | 4.855    | 1.403810505 |
| Bai1          | 22.747   | 16.2075  | 1.40348604  |
| Gm10020       | 128.7975 | 91.793   | 1.403129868 |
| Asnsd1        | 10.2745  | 7.3235   | 1.402949409 |
| Lrln3         | 8.27     | 5.8955   | 1.402764821 |
| Papss1        | 35.4095  | 25.258   | 1.401912265 |
| Rabif         | 26.044   | 18.578   | 1.401873183 |
| Ddx47         | 48.651   | 34.7105  | 1.401621988 |
| Irf2bp1       | 14.028   | 10.0085  | 1.401608633 |
| 2810453I06Rik | 13.067   | 9.3245   | 1.401362003 |
| Lbr           | 3.6925   | 2.6355   | 1.401062417 |
| Tsen54        | 1.625    | 1.16     | 1.400862069 |
| Cks1b         | 4.704    | 3.36     | 1.4         |
| Igsf8         | 32.6225  | 23.304   | 1.399866976 |
| Myh9          | 3.586    | 2.5625   | 1.399414634 |

|               |          |         |             |
|---------------|----------|---------|-------------|
| Akt1          | 40.127   | 28.676  | 1.399323476 |
| Gtf3c6        | 30.368   | 21.705  | 1.399124626 |
| Mkrm2         | 21.821   | 15.598  | 1.398961405 |
| Gm3550        | 2.385    | 1.705   | 1.398826979 |
| Snx14         | 15.946   | 11.4    | 1.39877193  |
| Ran           | 129.44   | 92.559  | 1.398459361 |
| Ier3ip1       | 33.4825  | 23.9425 | 1.398454631 |
| Pwp1          | 8.742    | 6.252   | 1.398272553 |
| Slc25a30      | 2.885    | 2.0635  | 1.398110007 |
| Nsmce4a       | 13.133   | 9.3945  | 1.397945606 |
| Ccdc85b       | 11.2245  | 8.03    | 1.397820672 |
| Pcbp3         | 37.7665  | 27.0295 | 1.397232653 |
| Zfp428        | 12.5045  | 8.9495  | 1.397228895 |
| Mfn2          | 54.2635  | 38.882  | 1.395594362 |
| Mark4         | 24.3085  | 17.422  | 1.395276088 |
| Mtg1          | 9.3815   | 6.724   | 1.395226056 |
| Mthfr         | 2.405    | 1.7245  | 1.394607133 |
| Gm3167        | 1.8375   | 1.318   | 1.394157815 |
| Serpinf1      | 13.524   | 9.7015  | 1.394011235 |
| Sec61a1       | 12.101   | 8.6815  | 1.393883545 |
| Pgs1          | 13.0175  | 9.3395  | 1.393811232 |
| Narf1         | 4.541    | 3.2585  | 1.393586006 |
| 1110004F10Rik | 88.556   | 63.5805 | 1.39281698  |
| Hddc2         | 37.5675  | 26.9825 | 1.3922913   |
| Zfyve21       | 3.486    | 2.504   | 1.392172524 |
| Nkrf          | 54.4415  | 39.121  | 1.391618312 |
| Eftud2        | 18.2485  | 13.1245 | 1.390414873 |
| Lonp1         | 10.6445  | 7.656   | 1.39034744  |
| Kirrel        | 1.4075   | 1.0125  | 1.390123457 |
| Med24         | 16.918   | 12.1715 | 1.389968369 |
| Gtf2e1        | 4.3885   | 3.1575  | 1.3898654   |
| Atp13a1       | 5.9135   | 4.255   | 1.389776733 |
| Cplx1         | 315.3155 | 226.911 | 1.389599887 |
| Hmgcl         | 14.197   | 10.217  | 1.389546834 |
| Thns11        | 4.9965   | 3.596   | 1.389460512 |
| Vwa5b1        | 3.6505   | 2.6275  | 1.389343482 |
| Uhrf2         | 15.3865  | 11.075  | 1.389300226 |
| Strn4         | 12.835   | 9.2405  | 1.388994102 |
| Gm11836       | 3.728    | 2.684   | 1.388971684 |
| Pou3f1        | 5.0275   | 3.622   | 1.388045279 |
| Fam108c       | 15.2115  | 10.9635 | 1.387467506 |
| Wdr24         | 2.844    | 2.0505  | 1.386978786 |
| Trappc4       | 61.053   | 44.019  | 1.386969263 |
| Synpr         | 16.293   | 11.7495 | 1.386697306 |
| Pa2g4         | 64.8075  | 46.7375 | 1.38662744  |
| Creb311       | 5.873    | 4.2355  | 1.386613151 |
| Ubac2         | 7.3235   | 5.282   | 1.386501325 |
| Sst           | 287.5195 | 207.44  | 1.386036926 |
| Gabbr1        | 98.4685  | 71.049  | 1.385923799 |
| Cope          | 88.1675  | 63.621  | 1.385823863 |
| Polr3d        | 7.579    | 5.469   | 1.385810934 |
| Gm4694        | 42.6505  | 30.7795 | 1.38567878  |
| Mafk          | 5.249    | 3.789   | 1.385325944 |
| Aard          | 7.4265   | 5.361   | 1.385282597 |
| Mrpl47        | 31.9865  | 23.0915 | 1.385206678 |

|               |          |          |             |
|---------------|----------|----------|-------------|
| Plk2          | 20.903   | 15.094   | 1.384854909 |
| Morn2         | 28.0335  | 20.247   | 1.384575493 |
| BC023829      | 11.0195  | 7.9615   | 1.384098474 |
| Sugp2         | 10.905   | 7.879    | 1.384058891 |
| Psmc13        | 20.9285  | 15.124   | 1.38379397  |
| Pick1         | 18.5665  | 13.4175  | 1.383752562 |
| Nrxn3         | 81.804   | 59.1355  | 1.383331501 |
| Mrpl48        | 46.1365  | 33.359   | 1.383030067 |
| D17Wsu104e    | 14.299   | 10.339   | 1.383015766 |
| Gm129         | 6.367    | 4.606    | 1.382327399 |
| 5730437N04Rik | 52.819   | 38.228   | 1.381683583 |
| 1110003E01Rik | 61.509   | 44.518   | 1.381665843 |
| Gaa           | 161.1235 | 116.6555 | 1.381190771 |
| Serf2         | 22.2445  | 16.117   | 1.380188621 |
| Pts           | 17.547   | 12.714   | 1.380132138 |
| Dhdds         | 19.983   | 14.481   | 1.379946136 |
| Vps25         | 39.9055  | 28.9185  | 1.379929803 |
| 1110032A13Rik | 9.6565   | 6.9985   | 1.379795671 |
| Ddx25         | 39.3955  | 28.5655  | 1.379128669 |
| Nipsnap3b     | 9.778    | 7.0915   | 1.378833815 |
| Grip2         | 5.7355   | 4.16     | 1.378725962 |
| 2310004I24Rik | 4.89     | 3.548    | 1.378241263 |
| Dctn6         | 148.6055 | 107.841  | 1.378005582 |
| Mospd1        | 10.7745  | 7.8195   | 1.3779014   |
| Enox1         | 8.815    | 6.3975   | 1.377881985 |
| Tekt5         | 8.1375   | 5.906    | 1.377836099 |
| Grpr          | 3.4775   | 2.524    | 1.377773376 |
| Hace1         | 7.897    | 5.7325   | 1.377583951 |
| Kifc3         | 6.26     | 4.5445   | 1.377489273 |
| Hs6st2        | 19.2655  | 13.986   | 1.377484627 |
| Dap3          | 18.357   | 13.3265  | 1.377480959 |
| Hmbs          | 4.0875   | 2.9685   | 1.37695806  |
| Ncbp2         | 56.1605  | 40.7915  | 1.37676967  |
| Trappc6b      | 117.681  | 85.4925  | 1.376506711 |
| Stamp         | 21.952   | 15.9505  | 1.376257798 |
| Itgb1bp1      | 13.548   | 9.8445   | 1.376199909 |
| Gbas          | 79.2565  | 57.5985  | 1.376016737 |
| Araf          | 158.232  | 115.0085 | 1.375828743 |
| Surf1         | 52.271   | 37.9945  | 1.375751754 |
| Cabyr         | 3.4255   | 2.4905   | 1.375426621 |
| Rbm42         | 23.939   | 17.406   | 1.375330346 |
| Srp54b        | 3.166    | 2.302    | 1.375325804 |
| Agpat6        | 11.33    | 8.239    | 1.375166889 |
| Atp6ap2       | 26.0955  | 18.978   | 1.375039519 |
| D130046C19Rik | 5.4265   | 3.948    | 1.374493414 |
| Srsf2         | 128.933  | 93.816   | 1.374317814 |
| Cops5         | 119.473  | 87.03    | 1.372779501 |
| Cbx7          | 23.004   | 16.758   | 1.372717508 |
| Zfp777        | 6.0315   | 4.394    | 1.372667274 |
| Glrx3         | 42.696   | 31.108   | 1.372508679 |
| Coro7         | 11.6735  | 8.5075   | 1.372142227 |
| 1700066C05Rik | 16.468   | 12.0065  | 1.371590389 |
| Ptpru         | 5.168    | 3.768    | 1.371549894 |
| Adra2a        | 6.004    | 4.3785   | 1.37124586  |
| Vasn          | 1.56     | 1.138    | 1.370826011 |

|               |          |          |             |
|---------------|----------|----------|-------------|
| Cotl1         | 17.7285  | 12.933   | 1.370795639 |
| Med4          | 16.415   | 11.976   | 1.370657983 |
| Snrpa         | 92.31    | 67.3725  | 1.370143605 |
| Snrnp27       | 45.714   | 33.3765  | 1.369646308 |
| Mbd3          | 21.477   | 15.6815  | 1.369575615 |
| Mesdc1        | 7.473    | 5.457    | 1.369433755 |
| Rtn1          | 1220.575 | 891.3715 | 1.369322443 |
| Cog8          | 7.1555   | 5.2265   | 1.369080647 |
| Sppl3         | 22.0305  | 16.0915  | 1.369076842 |
| 2310061C15Rik | 14.0375  | 10.254   | 1.36897796  |
| Stx18         | 10.1595  | 7.4225   | 1.368743685 |
| Cltc          | 46.2015  | 33.774   | 1.367960561 |
| Cthrc1        | 8.8      | 6.433    | 1.367946526 |
| Tuba1a        | 883.144  | 646.1075 | 1.366868516 |
| Psmc5         | 309.249  | 226.4055 | 1.36590763  |
| Scand3        | 8.959    | 6.5605   | 1.365597134 |
| Meaf6         | 91.8855  | 67.295   | 1.365413478 |
| Ktn1          | 23.886   | 17.4965  | 1.365187323 |
| 9130401M01Rik | 31.4575  | 23.0455  | 1.365017032 |
| Cutc          | 3.867    | 2.833    | 1.364984116 |
| Slc5a5        | 25.3865  | 18.601   | 1.364792215 |
| Dcakd         | 49.262   | 36.1015  | 1.36454164  |
| 2310004N24Rik | 25.331   | 18.5665  | 1.364338998 |
| Uqcrcl        | 79.6315  | 58.3675  | 1.364312331 |
| Ecell         | 23.9195  | 17.5345  | 1.364139268 |
| Nit1          | 23.5135  | 17.238   | 1.364050354 |
| Fam113b       | 12.066   | 8.847    | 1.363852153 |
| Eif1ax        | 51.2705  | 37.5925  | 1.363849172 |
| Ranbp2        | 8.0455   | 5.901    | 1.363412981 |
| Ttl9          | 1.5385   | 1.1285   | 1.363314134 |
| Rce1          | 3.38     | 2.4805   | 1.362628502 |
| Mmadhc        | 45.5475  | 33.4325  | 1.362371943 |
| Pebp1         | 561.742  | 412.371  | 1.362224793 |
| Hk1           | 38.437   | 28.218   | 1.36214473  |
| Parp6         | 31.854   | 23.387   | 1.362038739 |
| Tyh3          | 26.8005  | 19.677   | 1.36202165  |
| Zcchc4        | 2.8575   | 2.098    | 1.362011439 |
| Pcsk4         | 2.9765   | 2.1855   | 1.361930908 |
| Odz1          | 10.9345  | 8.032    | 1.361367032 |
| Rnf10         | 30.5335  | 22.429   | 1.361340229 |
| Eomes         | 1.4525   | 1.067    | 1.361293346 |
| Mak16         | 23.1215  | 16.9925  | 1.360688539 |
| Tmem209       | 6.165    | 4.533    | 1.360026473 |
| Usp19         | 12.83    | 9.437    | 1.359542227 |
| Btbd1         | 29.3325  | 21.577   | 1.359433656 |
| Cd151         | 9.473    | 6.969    | 1.359305496 |
| 1110008L16Rik | 9.912    | 7.292    | 1.359297861 |
| Slc5a6        | 5.4905   | 4.0395   | 1.359202872 |
| Ecsit         | 26.894   | 19.79    | 1.358969176 |
| Tmem63c       | 11.1205  | 8.1875   | 1.358229008 |
| Med16         | 13.751   | 10.125   | 1.358123457 |
| Gm15501       | 13.5795  | 10.003   | 1.357542737 |
| Snrpc         | 13.5515  | 9.988    | 1.356778134 |
| Nptx2         | 3.0775   | 2.2685   | 1.356623319 |
| Foxp4         | 24.217   | 17.851   | 1.356618677 |

|               |           |          |             |
|---------------|-----------|----------|-------------|
| Tubb2b        | 30.5295   | 22.506   | 1.356504932 |
| Bhlhb9        | 12.7555   | 9.4045   | 1.356318784 |
| Rnf8          | 11.379    | 8.3915   | 1.356015015 |
| Phlda1        | 44.4975   | 32.8225  | 1.35570112  |
| Stk30         | 9         | 6.639    | 1.355625847 |
| Map3k7        | 18.615    | 13.7345  | 1.355346026 |
| Stac          | 3.82      | 2.819    | 1.355090458 |
| Cct4          | 49.3765   | 36.442   | 1.354933868 |
| Bphl          | 13.827    | 10.2065  | 1.35472493  |
| Them4         | 16.843    | 12.436   | 1.354374397 |
| Prorsd1       | 4.505     | 3.3265   | 1.354276266 |
| Actr8         | 43.4425   | 32.0785  | 1.354255966 |
| Ano3          | 2.5855    | 1.9095   | 1.354019377 |
| Phc2          | 13.6505   | 10.085   | 1.353544869 |
| Srrm1         | 134.0615  | 99.0575  | 1.353370517 |
| 2810432D09Rik | 19.4675   | 14.3845  | 1.353366471 |
| Zfp598        | 10.4715   | 7.738    | 1.353256655 |
| 6330409N04Rik | 28.4805   | 21.0535  | 1.352767948 |
| Polr2a        | 22.455    | 16.6     | 1.352710843 |
| Hddc3         | 16.3395   | 12.0815  | 1.352439681 |
| Tsta3         | 5.816     | 4.3005   | 1.352400884 |
| Vdac2         | 146.4075  | 108.272  | 1.35221941  |
| Foxp2         | 13.1985   | 9.7625   | 1.351959027 |
| Mks1          | 1.888     | 1.3965   | 1.351951307 |
| Tecr          | 1269.3915 | 938.969  | 1.351899264 |
| 2700029M09Rik | 36.7215   | 27.1755  | 1.351272286 |
| Tmem87b       | 9.902     | 7.328    | 1.351255459 |
| Rpp38         | 14.0775   | 10.4225  | 1.350683617 |
| Mapk1ip1      | 28.242    | 20.922   | 1.349870949 |
| Sh2d3c        | 19.511    | 14.454   | 1.349868549 |
| Srp9          | 121.7465  | 90.1995  | 1.34974695  |
| Rnf139        | 5.118     | 3.792    | 1.349683544 |
| Xlr3b         | 1.5255    | 1.131    | 1.348806366 |
| Flrt3         | 14.9155   | 11.06    | 1.348598553 |
| Copg          | 119.9335  | 88.9475  | 1.348362798 |
| 1110012L19Rik | 10.824    | 8.0295   | 1.348029143 |
| Cdkn1a        | 25.0445   | 18.579   | 1.348000431 |
| BC003965      | 26.728    | 19.828   | 1.347992738 |
| Uqcr2         | 154.4935  | 114.6195 | 1.347881469 |
| Nup155        | 3.926     | 2.9135   | 1.347520165 |
| Zfp319        | 4.5895    | 3.406    | 1.347475044 |
| Flywch2       | 18.5085   | 13.74    | 1.347052402 |
| Elp2          | 30.041    | 22.3015  | 1.347039437 |
| Mrps10        | 38.0735   | 28.268   | 1.346876327 |
| Grpel2        | 4.769     | 3.541    | 1.346794691 |
| Slc39a6       | 17.748    | 13.18    | 1.346585736 |
| Gtpbp2        | 11.6545   | 8.656    | 1.346407116 |
| Tmem180       | 17.5435   | 13.0305  | 1.346341276 |
| Nck2          | 8.137     | 6.044    | 1.346293845 |
| Cstf2t        | 16.7385   | 12.434   | 1.346187872 |
| Sult2b1       | 2.831     | 2.103    | 1.346172135 |
| Mrps22        | 28.119    | 20.891   | 1.34598631  |
| Cherp         | 22.955    | 17.058   | 1.345702896 |
| Hspa1a        | 2.6325    | 1.9575   | 1.344827586 |
| Zfr2          | 16.332    | 12.1445  | 1.344806291 |

|               |          |          |             |
|---------------|----------|----------|-------------|
| Zfp335        | 5.4675   | 4.068    | 1.344026549 |
| Sh3bp5l       | 6.5205   | 4.853    | 1.343601896 |
| Rhov          | 11.235   | 8.364    | 1.343256815 |
| Gpc3          | 6.602    | 4.917    | 1.342688631 |
| Mpg           | 10.3385  | 7.701    | 1.342487989 |
| Zfp513        | 4.1835   | 3.1195   | 1.341080301 |
| Cyb5r1        | 8.2295   | 6.1385   | 1.340636963 |
| Thap7         | 4.8555   | 3.6235   | 1.34000276  |
| Nefl          | 203.425  | 151.8845 | 1.339340091 |
| Mospd3        | 43.1045  | 32.1865  | 1.339210539 |
| Prkag2        | 11.6235  | 8.68     | 1.339112903 |
| Wdr45l        | 15.898   | 11.8765  | 1.33860986  |
| Dpp9          | 19.2075  | 14.3495  | 1.338548381 |
| BC031781      | 9.6895   | 7.239    | 1.338513607 |
| Dpm2          | 67.7485  | 50.631   | 1.338083388 |
| Katna1        | 3.541    | 2.6465   | 1.337993576 |
| Copb1         | 8.391    | 6.2715   | 1.337957426 |
| Glce          | 11.9765  | 8.9525   | 1.337782742 |
| Gabrq         | 13.0345  | 9.7465   | 1.33735187  |
| Sphk2         | 12.9455  | 9.683    | 1.336930703 |
| Gldn          | 4.26     | 3.1865   | 1.336890005 |
| Svop          | 29.868   | 22.345   | 1.336674871 |
| Traip         | 1.962    | 1.468    | 1.336512262 |
| Pdcd10        | 24.7755  | 18.5395  | 1.336362901 |
| Nestn         | 16.419   | 12.2935  | 1.335583845 |
| Slc4a3        | 10.159   | 7.609    | 1.335129452 |
| Ciapin1       | 9.255    | 6.9325   | 1.335016228 |
| C030019I05Rik | 13.6845  | 10.2535  | 1.334617448 |
| N4bp2         | 5.8975   | 4.419    | 1.334577959 |
| LOC100503659  | 196.7535 | 147.439  | 1.334473918 |
| Mff           | 98.125   | 73.5365  | 1.334371367 |
| Zfp623        | 6.6365   | 4.974    | 1.334238038 |
| Tnrc18        | 8.27     | 6.199    | 1.334086143 |
| Crls1         | 9.8315   | 7.37     | 1.333989145 |
| Mdh2          | 477.1325 | 357.912  | 1.333100036 |
| Gm10155       | 12.0925  | 9.072    | 1.332947531 |
| Ube2i         | 121.965  | 91.503   | 1.332907118 |
| Prr3          | 31.8005  | 23.8625  | 1.332655841 |
| Tpst2         | 3.3825   | 2.539    | 1.332217408 |
| Rps11         | 323.56   | 242.8805 | 1.332177758 |
| Srrd          | 4.22     | 3.168    | 1.332070707 |
| Actg1         | 348.8835 | 261.935  | 1.331946857 |
| Rexo4         | 17.658   | 13.259   | 1.331774644 |
| Alad          | 9.2605   | 6.954    | 1.331679609 |
| Atp1a1        | 46.831   | 35.179   | 1.33122033  |
| Atg4c         | 14.5005  | 10.894   | 1.331053791 |
| Trub2         | 7.249    | 5.4465   | 1.330946479 |
| Cnot2         | 33.5595  | 25.2175  | 1.330802022 |
| Nipsnap1      | 28.1095  | 21.1225  | 1.330784708 |
| Dusp3         | 44.911   | 33.749   | 1.330735726 |
| 1110051M20Rik | 32.855   | 24.6915  | 1.330619849 |
| Vamp2         | 1184.401 | 890.516  | 1.33001653  |
| Nup62         | 42.089   | 31.646   | 1.329994312 |
| Atg16l1       | 6.7555   | 5.0795   | 1.329953736 |
| 1810029B16Rik | 16.0785  | 12.099   | 1.32891148  |



|               |          |          |             |
|---------------|----------|----------|-------------|
| Habp4         | 137.8785 | 103.7585 | 1.328840529 |
| Ncdn          | 239.572  | 180.368  | 1.328240043 |
| Arl1          | 28.5405  | 21.492   | 1.327959241 |
| Ftl2          | 3.864    | 2.9105   | 1.32760694  |
| Ergic1        | 42.7425  | 32.1995  | 1.327427445 |
| Rpl23         | 268.984  | 202.6475 | 1.327349215 |
| Sert2         | 6.985    | 5.2625   | 1.327315914 |
| B4galnt4      | 11.174   | 8.4195   | 1.327157195 |
| Usp14         | 23.086   | 17.402   | 1.326629123 |
| Gm9234        | 4.7075   | 3.5495   | 1.326243133 |
| 1810043H04Rik | 20.954   | 15.802   | 1.326034679 |
| Gm10163       | 96.135   | 72.549   | 1.325104412 |
| Lmnb2         | 8.6985   | 6.5645   | 1.32508188  |
| D2Wsu81e      | 7.921    | 5.98     | 1.32458194  |
| 2310044H10Rik | 56.2105  | 42.445   | 1.324313818 |
| Rogdi         | 119.008  | 89.868   | 1.324253349 |
| Sv2c          | 27.041   | 20.4205  | 1.324208516 |
| Daxx          | 15.4065  | 11.644   | 1.323127791 |
| Slc22a17      | 125.3485 | 94.779   | 1.322534528 |
| Farsb         | 60.86    | 46.0385  | 1.321937074 |
| Klhl28        | 5.2375   | 3.9625   | 1.321766562 |
| Cc2d1a        | 11.903   | 9.007    | 1.321527701 |
| Pcgf1         | 24.876   | 18.824   | 1.321504462 |
| Bop1          | 6.22     | 4.709    | 1.32087492  |
| Clta          | 204.782  | 155.082  | 1.320475619 |
| Mfsd3         | 1.534    | 1.1625   | 1.319569892 |
| Poldip2       | 45.018   | 34.1185  | 1.319460117 |
| Ptch1         | 28.911   | 21.9115  | 1.319444128 |
| Adc           | 10.692   | 8.104    | 1.31934847  |
| Fam54b        | 47.587   | 36.072   | 1.319222666 |
| Psmc6         | 57.8545  | 43.864   | 1.31895176  |
| Ufm1          | 8.967    | 6.8      | 1.318676471 |
| Man2c1        | 2.769    | 2.1      | 1.318571429 |
| Fxyd6         | 139.9305 | 106.123  | 1.318569019 |
| Eif2b5        | 19.628   | 14.887   | 1.318465776 |
| Rgs7          | 56.687   | 43.0045  | 1.318164378 |
| Atp6v1g2      | 898.4635 | 681.711  | 1.317953649 |
| Palm          | 30.725   | 23.3165  | 1.317736367 |
| Tubb2c        | 192.927  | 146.4125 | 1.317694869 |
| Tpi1          | 222.873  | 169.143  | 1.317660205 |
| Numbl         | 18.963   | 14.3945  | 1.317378165 |
| Lmtk3         | 5.1535   | 3.913    | 1.317020189 |
| Atp13a2       | 14.808   | 11.245   | 1.316851934 |
| Cfl1          | 717.325  | 544.8825 | 1.316476488 |
| Ndel1         | 22.945   | 17.4295  | 1.316446255 |
| Rbm39         | 83.272   | 63.267   | 1.316199599 |
| Atp1a3        | 701.2845 | 532.8685 | 1.316055462 |
| Pik3r4        | 9.1255   | 6.9425   | 1.314440043 |
| Penxl2        | 5.266    | 4.0065   | 1.314364158 |
| Eif3h         | 164.645  | 125.288  | 1.314132239 |
| Rpl30         | 504.929  | 384.315  | 1.31384151  |
| Ociad1        | 125.9045 | 95.835   | 1.313763239 |
| Stx6          | 16.731   | 12.736   | 1.313677764 |
| Rab15         | 70.8555  | 53.962   | 1.313062896 |
| Rraga         | 133.0145 | 101.321  | 1.312802874 |

|               |          |          |             |
|---------------|----------|----------|-------------|
| Nol6          | 35.772   | 27.2615  | 1.312180181 |
| Ablim3        | 19.139   | 14.587   | 1.312058682 |
| Arl15         | 7.1415   | 5.4455   | 1.311449821 |
| Tmem60        | 61.5465  | 46.942   | 1.311117975 |
| Rbmxt         | 33.35    | 25.4425  | 1.31079886  |
| Mprip         | 26.9795  | 20.5875  | 1.31047966  |
| Gtpbp5        | 4.18     | 3.19     | 1.310344828 |
| H2-Ke2        | 46.221   | 35.276   | 1.310267604 |
| Apex2         | 2.3335   | 1.781    | 1.310218978 |
| Chpf2         | 4.6535   | 3.552    | 1.310106982 |
| Cygb          | 89.568   | 68.3845  | 1.309770489 |
| 2610318N02Rik | 2.818    | 2.152    | 1.309479554 |
| Dvl3          | 28.6915  | 21.919   | 1.308978512 |
| Fam40a        | 19.8165  | 15.142   | 1.30871087  |
| Cckbr         | 5.3845   | 4.115    | 1.308505468 |
| Hyou1         | 28.649   | 21.899   | 1.308233253 |
| Zfp146        | 20.978   | 16.036   | 1.308181591 |
| Tatdn1        | 7.4465   | 5.6925   | 1.308124726 |
| Slc30a5       | 5.571    | 4.259    | 1.308053534 |
| 1110012J17Rik | 7.019    | 5.366    | 1.30805069  |
| Rfwd2         | 12.5055  | 9.566    | 1.307286222 |
| Tmem55a       | 21.8925  | 16.755   | 1.306624888 |
| Slc16a14      | 2.9695   | 2.273    | 1.306423229 |
| Fcrlb         | 1.5315   | 1.1725   | 1.306183369 |
| Olfm2         | 46.2145  | 35.3825  | 1.306140041 |
| Llph          | 117.6645 | 90.102   | 1.30590331  |
| Idh3g         | 194.693  | 149.109  | 1.305709246 |
| Gfra1         | 13.985   | 10.714   | 1.305301475 |
| Nol12         | 11.597   | 8.887    | 1.3049398   |
| Asns          | 53.001   | 40.617   | 1.304896964 |
| Pgrmc1        | 56.083   | 42.9865  | 1.304665418 |
| Egfem1        | 1.3855   | 1.062    | 1.304613936 |
| Dlk1          | 160.9265 | 123.3595 | 1.304532687 |
| Syt6          | 14.174   | 10.871   | 1.303835894 |
| Zdhhc23       | 2.1815   | 1.6735   | 1.303555423 |
| Ppt2          | 5.5625   | 4.27     | 1.302693208 |
| St8sia6       | 3.9165   | 3.0065   | 1.302677532 |
| 2510012J08Rik | 6.4365   | 4.9415   | 1.302539715 |
| Ilf2          | 44.079   | 33.8415  | 1.302513186 |
| Cldn12        | 10.018   | 7.6935   | 1.302138169 |
| Bend7         | 1.5495   | 1.19     | 1.30210084  |
| 1110032A03Rik | 44.895   | 34.49    | 1.301681647 |
| Rptor         | 13.7465  | 10.561   | 1.301628634 |
| Fbxo44        | 52.1735  | 40.0835  | 1.301620367 |
| Ret           | 2.7825   | 2.138    | 1.301449953 |
| Phf23         | 13.6075  | 10.4625  | 1.300597372 |
| Nceh1         | 31.886   | 24.5235  | 1.300222236 |
| Epb4.9        | 86.534   | 66.565   | 1.299992489 |
| D10Wsu52e     | 67.774   | 52.1375  | 1.299908895 |
| Psm4          | 54.3075  | 41.7835  | 1.299735542 |
| Aco1          | 6.659    | 5.1235   | 1.299697472 |
| Abcf1         | 39.16    | 30.1495  | 1.298860678 |
| Fam84a        | 15.1745  | 11.684   | 1.298741869 |
| Zbtb48        | 1.976    | 1.5215   | 1.29871837  |
| Hdac2         | 44.4025  | 34.1935  | 1.298565517 |

|               |          |          |             |
|---------------|----------|----------|-------------|
| Phf12         | 36.391   | 28.026   | 1.298472847 |
| Ppcs          | 5.7      | 4.39     | 1.298405467 |
| Sntg1         | 13.982   | 10.7695  | 1.298296114 |
| Syap1         | 15.9435  | 12.282   | 1.298119199 |
| Mus81         | 2.123    | 1.636    | 1.297677262 |
| Tipin         | 4.783    | 3.6865   | 1.297436593 |
| Rps15         | 1093.637 | 843.0465 | 1.297243984 |
| Bcl2l1        | 25.153   | 19.3905  | 1.29718161  |
| Stmn1         | 632.122  | 487.548  | 1.296532854 |
| Car7          | 1.3435   | 1.0365   | 1.296189098 |
| Gm5620        | 52.69    | 40.661   | 1.295836305 |
| Dolpp1        | 4.043    | 3.12     | 1.295833333 |
| Lrfn5         | 15.0305  | 11.603   | 1.295397742 |
| Rnf145        | 21.0165  | 16.225   | 1.295315871 |
| Mgat1         | 7.69     | 5.937    | 1.29526697  |
| Grik2         | 22.0855  | 17.0515  | 1.295223294 |
| Brix1         | 8.813    | 6.8045   | 1.295172312 |
| Osbp19        | 23.665   | 18.273   | 1.295080173 |
| Adrm1         | 37.656   | 29.0765  | 1.295066463 |
| Impdh1        | 7.402    | 5.7165   | 1.294848246 |
| Ccl27a        | 261.87   | 202.252  | 1.29477088  |
| Dennd4b       | 6.565    | 5.0715   | 1.29448881  |
| Mcf2          | 7.5405   | 5.826    | 1.294284243 |
| Mknk2         | 2.8135   | 2.174    | 1.294158234 |
| Cntn5         | 1.4575   | 1.1265   | 1.293830448 |
| 4930444A02Rik | 13.9855  | 10.8125  | 1.293456647 |
| Fgfr1op       | 13.7865  | 10.659   | 1.293414016 |
| Cdkal1        | 10.1965  | 7.8855   | 1.293069558 |
| Trim41        | 7.842    | 6.0655   | 1.292885995 |
| Mrfap1        | 500.7535 | 387.323  | 1.292857641 |
| Dynll2        | 131.4395 | 101.6745 | 1.292747936 |
| Prmt7         | 16.581   | 12.8315  | 1.292210576 |
| Kcnj3         | 21.2065  | 16.4115  | 1.292173171 |
| Ebf4          | 2.5565   | 1.9795   | 1.291487749 |
| Nprl3         | 5.531    | 4.283    | 1.291384544 |
| Cdc34         | 17.125   | 13.2635  | 1.291137332 |
| Atp5a1        | 492.687  | 381.6585 | 1.290910592 |
| Zmiz2         | 53.657   | 41.5825  | 1.290374557 |
| Eprs          | 21.14    | 16.383   | 1.290361961 |
| Pde2a         | 19.199   | 14.8795  | 1.290298733 |
| Zmym3         | 27.015   | 20.9485  | 1.28959114  |
| Mett1ld1      | 4.5075   | 3.4955   | 1.289515091 |
| Slc25a11      | 67.1895  | 52.1185  | 1.289167954 |
| Gm6341        | 6.7745   | 5.255    | 1.289153187 |
| Nmt1          | 30.7915  | 23.8885  | 1.288967495 |
| Ascc3         | 4.531    | 3.5155   | 1.288863604 |
| Sgsm1         | 28.796   | 22.3565  | 1.288037036 |
| Ing4          | 6.6855   | 5.1905   | 1.288026202 |
| Timm17b       | 32.645   | 25.3455  | 1.287999842 |
| 1110021L09Rik | 10.118   | 7.8565   | 1.287850824 |
| C230096C10Rik | 11.8875  | 9.2325   | 1.28757108  |
| Otub1         | 182.288  | 141.5775 | 1.287549222 |
| Sqstm1        | 141.9005 | 110.229  | 1.28732457  |
| Hmgn2         | 65.0145  | 50.5085  | 1.287199184 |
| Pex10         | 6.161    | 4.7875   | 1.28689295  |

|               |          |          |             |
|---------------|----------|----------|-------------|
| 1700003E16Rik | 3.699    | 2.875    | 1.286608696 |
| Katnb1        | 6.779    | 5.2695   | 1.286459816 |
| E2f3          | 8.9105   | 6.928    | 1.286157621 |
| Hexdc         | 3.178    | 2.471    | 1.28611898  |
| Nol8          | 13.3665  | 10.394   | 1.285982297 |
| Dtnbp1        | 34.1215  | 26.5465  | 1.285348351 |
| Vapa          | 77.619   | 60.389   | 1.285316862 |
| Mrpl18        | 88.807   | 69.1215  | 1.284795614 |
| 0610009D07Rik | 30.9455  | 24.087   | 1.284738656 |
| Lrrtm3        | 26.099   | 20.3185  | 1.284494426 |
| Scamp4        | 21.6465  | 16.86    | 1.283896797 |
| Cwc15         | 84.7305  | 66.021   | 1.283387104 |
| Rps8          | 375.0065 | 292.2595 | 1.283128521 |
| Slc25a29      | 2.0135   | 1.5695   | 1.282892641 |
| Gm16517       | 38.4255  | 29.9715  | 1.282067965 |
| Cobra1        | 15.7095  | 12.255   | 1.281884945 |
| Pkig          | 12.143   | 9.4745   | 1.281650747 |
| Fam118b       | 11.0625  | 8.632    | 1.281568582 |
| Tubb5         | 187.031  | 145.94   | 1.281560915 |
| Eif2s2        | 68.0895  | 53.1305  | 1.281552028 |
| Rps20         | 230.6475 | 180.069  | 1.280883994 |
| Prpf38a       | 12.576   | 9.821    | 1.280521332 |
| Maea          | 49.6075  | 38.744   | 1.280391803 |
| Gm5567        | 61.6675  | 48.1735  | 1.28011251  |
| Gle1          | 10.807   | 8.4435   | 1.279919465 |
| 2900062L11Rik | 47.847   | 37.3835  | 1.279896211 |
| Ckb           | 545.71   | 426.46   | 1.279627632 |
| Ndufa9        | 121.606  | 95.042   | 1.279497485 |
| 17Rn6         | 127.7195 | 99.828   | 1.27939556  |
| Gripap1       | 20.2315  | 15.8145  | 1.279300642 |
| Frg1          | 14.2955  | 11.177   | 1.279010468 |
| 1700049G17Rik | 1.681    | 1.315    | 1.278326996 |
| Lhfp15        | 10.929   | 8.5505   | 1.278170867 |
| Herc2         | 13.0805  | 10.2385  | 1.277579724 |
| AU040829      | 80.668   | 63.155   | 1.277301876 |
| Timm50        | 9.6015   | 7.518    | 1.277134876 |
| Wnt7b         | 1.337    | 1.047    | 1.276981853 |
| Uba1          | 138.962  | 108.841  | 1.276743139 |
| Srp54c        | 10.265   | 8.0445   | 1.276027099 |
| Kars          | 40.818   | 31.995   | 1.275761838 |
| Slco4c1       | 2.6465   | 2.075    | 1.275421687 |
| Alox5ap       | 2.74     | 2.1485   | 1.275308355 |
| Prkra         | 17.762   | 13.929   | 1.275181276 |
| E130309F12Rik | 5.1055   | 4.005    | 1.274781523 |
| Fuz           | 8.646    | 6.7825   | 1.274751198 |
| Ppp2r5b       | 16.8745  | 13.2375  | 1.274749764 |
| L3mbtl3       | 7.394    | 5.8015   | 1.274497975 |
| Zfp367        | 2.686    | 2.1075   | 1.274495848 |
| D030016E14Rik | 17.0095  | 13.347   | 1.274406234 |
| Cdc26         | 44.0355  | 34.557   | 1.274285962 |
| Acyp1         | 96.7125  | 75.9235  | 1.27381509  |
| Necap1        | 132.9315 | 104.362  | 1.273753857 |
| Rab33a        | 22.196   | 17.427   | 1.273655821 |
| Eif3e         | 34.5895  | 27.16    | 1.273545655 |
| Celf6         | 25.967   | 20.398   | 1.273016962 |

|                   |          |          |             |
|-------------------|----------|----------|-------------|
| Aars              | 33.4535  | 26.28    | 1.272964231 |
| Cys1              | 4.8665   | 3.823    | 1.272953178 |
| Mrpl40            | 30.951   | 24.329   | 1.272185458 |
| Sar1b             | 71.1895  | 55.9685  | 1.271956547 |
| Igsf21            | 8.2625   | 6.4995   | 1.271251635 |
| Rab8a             | 30.3945  | 23.912   | 1.271098193 |
| Btbd6             | 22.111   | 17.3975  | 1.270929731 |
| Actr3b            | 10.4285  | 8.2065   | 1.270760982 |
| Islr2             | 9.0965   | 7.159    | 1.270638357 |
| Tmsb15b1-Tmsb15b2 | 3.0345   | 2.3885   | 1.270462633 |
| Cdh8              | 9.2595   | 7.29     | 1.270164609 |
| Chpf              | 8.996    | 7.0845   | 1.269814384 |
| Cct8              | 50.186   | 39.5235  | 1.269776209 |
| Fbxo21            | 46.5505  | 36.6675  | 1.269530238 |
| Podxl2            | 44.5125  | 35.0635  | 1.26948251  |
| Prosc             | 20.2085  | 15.919   | 1.269457881 |
| Pgam1             | 456.129  | 359.3535 | 1.269304459 |
| Mpdz              | 5.063    | 3.9895   | 1.269081339 |
| Alg3              | 10.6665  | 8.405    | 1.269066032 |
| Vars2             | 1.6815   | 1.325    | 1.269056604 |
| Kdm5b             | 14.5935  | 11.5005  | 1.268944828 |
| Vat1              | 53.405   | 42.0915  | 1.268783484 |
| Fbxo34            | 7.4115   | 5.842    | 1.268657994 |
| Hspb6             | 41.5915  | 32.784   | 1.268652391 |
| Msra              | 11.088   | 8.7405   | 1.268577313 |
| Klhl25            | 2.1595   | 1.7025   | 1.268428781 |
| Abce1             | 14.78    | 11.656   | 1.268016472 |
| Rictor            | 10.1555  | 8.009    | 1.268010988 |
| Arsa              | 3.389    | 2.673    | 1.267863823 |
| Spryd4            | 3.2585   | 2.5705   | 1.267652208 |
| Prps2             | 9.2585   | 7.3065   | 1.267159379 |
| Pbx4              | 5.6345   | 4.449    | 1.266464374 |
| Lrrc59            | 45.1045  | 35.62    | 1.26626895  |
| 1810037117Rik     | 37.799   | 29.855   | 1.266086083 |
| Per2              | 6.636    | 5.243    | 1.265687583 |
| Nle1              | 3.0855   | 2.438    | 1.265586546 |
| Echs1             | 19.7705  | 15.622   | 1.265554987 |
| Pank4             | 9.2845   | 7.338    | 1.265263014 |
| Gm6807            | 1.784    | 1.4105   | 1.264799716 |
| Galnt7            | 5.3285   | 4.213    | 1.264775694 |
| Rab11b            | 140.454  | 111.051  | 1.264770241 |
| Magoh             | 43.1595  | 34.125   | 1.264747253 |
| Pfn2              | 102.208  | 80.83    | 1.26448101  |
| Srsf5             | 353.3125 | 279.4185 | 1.264456362 |
| Ephx4             | 2.013    | 1.592    | 1.264447236 |
| Snupn             | 15.5725  | 12.322   | 1.263796462 |
| Tmem106c          | 23.182   | 18.3505  | 1.263289829 |
| Immp11            | 27.822   | 22.024   | 1.263258264 |
| E2f6              | 27.136   | 21.4865  | 1.262932539 |
| Aprt              | 24.8505  | 19.6795  | 1.262760741 |
| Unc13a            | 25.414   | 20.1275  | 1.262650602 |
| Ras110a           | 2.6445   | 2.0945   | 1.262592504 |
| Lypd1             | 73.5525  | 58.2565  | 1.262562976 |
| Pam               | 23.661   | 18.7405  | 1.262559697 |
| Rnaseh2b          | 19.784   | 15.67    | 1.262539885 |

|               |         |          |             |
|---------------|---------|----------|-------------|
| Ube2n         | 58.9495 | 46.703   | 1.262220842 |
| Pdia6         | 17.833  | 14.129   | 1.26215585  |
| 1700029I01Rik | 1.317   | 1.0435   | 1.262098706 |
| Ccdc130       | 3.3995  | 2.694    | 1.261878248 |
| Ache          | 25.9975 | 20.604   | 1.261769559 |
| Cebpz         | 12.8615 | 10.194   | 1.261673533 |
| Polr3gl       | 11.247  | 8.9165   | 1.261369371 |
| Rpl7          | 141.878 | 112.4935 | 1.261210648 |
| Tspan3        | 103.808 | 82.3335  | 1.260823359 |
| Cops7b        | 11.8195 | 9.3745   | 1.26081391  |
| Tmem50b       | 77.622  | 61.573   | 1.26064996  |
| Hpcal1        | 79.93   | 63.416   | 1.260407468 |
| Larp1b        | 6.003   | 4.7635   | 1.26020783  |
| Rps5          | 329.087 | 261.1865 | 1.259969409 |
| Rxb           | 8.5915  | 6.82     | 1.259750733 |
| Gins3         | 1.4825  | 1.177    | 1.259558199 |
| Fam50a        | 11.711  | 9.2995   | 1.259315017 |
| Hiat1         | 4.781   | 3.799    | 1.258489076 |
| Fam103a1      | 119.102 | 94.6755  | 1.258002334 |
| Pkp2          | 3.516   | 2.796    | 1.25751073  |
| St7           | 8.852   | 7.0395   | 1.257475673 |
| BC031181      | 137.729 | 109.537  | 1.257374221 |
| Gm765         | 2.1065  | 1.6755   | 1.257236646 |
| Fbxo2         | 39.8465 | 31.6945  | 1.257205509 |
| Txndc5        | 10.366  | 8.2455   | 1.257170578 |
| Sh2b1         | 13.2205 | 10.517   | 1.257059998 |
| Dom3z         | 3.36    | 2.673    | 1.25701459  |
| Acvr2b        | 2.763   | 2.1985   | 1.256765977 |
| Exosc8        | 11.385  | 9.059    | 1.256761232 |
| Tpd52         | 26.2795 | 20.9105  | 1.256760957 |
| Preb          | 16.488  | 13.121   | 1.256611539 |
| Gm2095        | 23.5515 | 18.7445  | 1.256448558 |
| Rims3         | 14.363  | 11.4325  | 1.256330636 |
| Nfkbib        | 23.971  | 19.086   | 1.255946767 |
| 2810432L12Rik | 11.6445 | 9.2715   | 1.25594564  |
| Pcdhga6       | 2.0075  | 1.599    | 1.25547217  |
| Ndn           | 149.814 | 119.365  | 1.255091526 |
| Ldoc1         | 1.8035  | 1.437    | 1.255045233 |
| Med8          | 10.781  | 8.5915   | 1.254844905 |
| Med28         | 17.8825 | 14.2525  | 1.254692159 |
| Unc5a         | 19.1945 | 15.2995  | 1.254583483 |
| 4921524J17Rik | 6.2485  | 4.982    | 1.254215175 |
| Xpa           | 24.5175 | 19.553   | 1.253899657 |
| Tbc1d8        | 6.1655  | 4.918    | 1.253660024 |
| Mier2         | 4.251   | 3.3915   | 1.253427687 |
| Rps7          | 270.073 | 215.473  | 1.253396017 |
| 1810008A18Rik | 9.3965  | 7.497    | 1.253368014 |
| Rnf41         | 22.8175 | 18.205   | 1.25336446  |
| Topbp1        | 3.8975  | 3.111    | 1.2528126   |
| Rae1          | 17.1775 | 13.715   | 1.252460809 |
| Sart3         | 12.899  | 10.304   | 1.251843944 |
| Rangrf        | 16.6315 | 13.2865  | 1.251759305 |
| Tmem63b       | 33.081  | 26.43    | 1.251645857 |
| Ell3          | 5.793   | 4.6285   | 1.251593389 |
| Ctf1          | 1.49    | 1.1905   | 1.251574969 |

|               |          |          |             |
|---------------|----------|----------|-------------|
| Ptplad1       | 53.6485  | 42.87    | 1.251422906 |
| Cox15         | 18.135   | 14.492   | 1.251380072 |
| Rlf           | 5.115    | 4.088    | 1.251223092 |
| C87436        | 7.7175   | 6.169    | 1.25101313  |
| Ankle2        | 8.1445   | 6.5105   | 1.250979187 |
| Bat4          | 9.2785   | 7.4195   | 1.250555967 |
| Dlk2          | 7.942    | 6.3515   | 1.250413288 |
| Dusp26        | 67.152   | 53.7135  | 1.2501885   |
| Tbk1          | 14.737   | 11.792   | 1.24974559  |
| Loh12cr1      | 10.7965  | 8.6425   | 1.249233439 |
| Ube2a         | 20.278   | 16.233   | 1.249183761 |
| Gm996         | 13.9515  | 11.1715  | 1.248847514 |
| Msh6          | 6.1315   | 4.91     | 1.248778004 |
| Mphosph6      | 12.301   | 9.8525   | 1.248515605 |
| Trnau1ap      | 3.547    | 2.841    | 1.248504048 |
| Flywch1       | 38.2125  | 30.607   | 1.248488908 |
| Armxc2        | 15.3915  | 12.329   | 1.248398086 |
| Psd           | 30.7365  | 24.6305  | 1.247904021 |
| Hadha         | 23.4745  | 18.8145  | 1.24768131  |
| Zdhhc22       | 18.3115  | 14.682   | 1.247207465 |
| Ppp6r2        | 18.688   | 14.9895  | 1.246739384 |
| Anapc10       | 7.717    | 6.1915   | 1.246386175 |
| Dhx36         | 8.8485   | 7.1015   | 1.246004365 |
| Rfxap         | 17.532   | 14.0725  | 1.245834074 |
| 1110004E09Rik | 62.4665  | 50.1425  | 1.245779528 |
| Sigmar1       | 13.002   | 10.4395  | 1.245461947 |
| Rnf187        | 132.0175 | 106.029  | 1.245107471 |
| Tubgcp3       | 18.947   | 15.2215  | 1.244752488 |
| Aldh4a1       | 3.0885   | 2.4815   | 1.244610115 |
| Spnb4         | 2.9575   | 2.377    | 1.244215398 |
| Zfp639        | 14.363   | 11.5465  | 1.243926731 |
| Ipo4          | 21.7525  | 17.494   | 1.243426318 |
| Pdf           | 16.684   | 13.419   | 1.243311722 |
| Stt3b         | 8.687    | 6.9885   | 1.243042141 |
| Gcsh          | 54.9235  | 44.191   | 1.242866194 |
| Tdrd7         | 12.3235  | 9.917    | 1.242664112 |
| Stk16         | 22.687   | 18.269   | 1.241830423 |
| Kbtbd4        | 17.038   | 13.7215  | 1.24170098  |
| Sorcs3        | 7.5875   | 6.111    | 1.241613484 |
| Tbrg1         | 24.518   | 19.754   | 1.241166346 |
| Cenpt         | 7.0355   | 5.669    | 1.241047804 |
| Lass1         | 8.756    | 7.058    | 1.240578067 |
| Oxa11         | 38.207   | 30.811   | 1.24004414  |
| Map11c3b      | 152.107  | 122.6805 | 1.239862896 |
| Atic          | 21.694   | 17.5     | 1.239657143 |
| Tap1          | 4.972    | 4.011    | 1.239591124 |
| Cbara1        | 17.4575  | 14.0835  | 1.239571129 |
| Tsr2          | 18.992   | 15.322   | 1.239524866 |
| Zdhhc16       | 4.4485   | 3.589    | 1.23948175  |
| Dnajc9        | 24.3055  | 19.616   | 1.239065049 |
| 6330406I15Rik | 3.9245   | 3.1675   | 1.23898974  |
| Setd3         | 76.1895  | 61.523   | 1.238390521 |
| Rem2          | 1.914    | 1.546    | 1.238033635 |
| Nol7          | 32.3485  | 26.1325  | 1.237864728 |
| Nprl2         | 17.9495  | 14.504   | 1.237555157 |

|               |          |          |             |
|---------------|----------|----------|-------------|
| Plekhj1       | 10.558   | 8.533    | 1.237313958 |
| Eif4a1        | 168.043  | 135.841  | 1.237056559 |
| Esd           | 69.5425  | 56.22    | 1.236970829 |
| Rpl15         | 196.8125 | 159.14   | 1.236725525 |
| Camk1         | 15.946   | 12.8945  | 1.236651285 |
| F8a           | 4.5315   | 3.6645   | 1.236594351 |
| Pak1ip1       | 18.29    | 14.7935  | 1.236353804 |
| Trappc1       | 100.937  | 81.6455  | 1.23628369  |
| Zfp295        | 7.5045   | 6.072    | 1.235918972 |
| 1110034B05Rik | 6.3415   | 5.1315   | 1.235798499 |
| Scamp3        | 54.8935  | 44.42    | 1.235783431 |
| Arhgap6       | 16.7255  | 13.544   | 1.234901063 |
| Arhgap36      | 39.0985  | 31.6625  | 1.234851954 |
| Cnga4         | 1.2675   | 1.0265   | 1.234778373 |
| Yeats4        | 36.939   | 29.916   | 1.234757321 |
| Abcd3         | 16.5265  | 13.3845  | 1.23474915  |
| Ttc30b        | 4.478    | 3.627    | 1.23462917  |
| Vwc21         | 6.794    | 5.5035   | 1.234487145 |
| Hectd1        | 13.165   | 10.668   | 1.234064492 |
| Atn1          | 120.2315 | 97.431   | 1.234016894 |
| Naa35         | 25.8335  | 20.9375  | 1.233838806 |
| Rab42-ps      | 1.88     | 1.524    | 1.233595801 |
| Glp1r         | 10.174   | 8.2475   | 1.233585935 |
| Pcdhga5       | 6.392    | 5.182    | 1.233500579 |
| Basp1         | 389.604  | 315.9235 | 1.2332226   |
| Lmbr1         | 6.9765   | 5.658    | 1.233032874 |
| Bcr           | 30.0285  | 24.3565  | 1.232874181 |
| Sh3glb2       | 48.696   | 39.5     | 1.232810127 |
| Nop14         | 19.8855  | 16.137   | 1.232292248 |
| Glr2          | 26.845   | 21.785   | 1.23226991  |
| Azi1          | 2.277    | 1.848    | 1.232142857 |
| Impdh2        | 16.211   | 13.16    | 1.231838906 |
| Emb           | 13.7035  | 11.1245  | 1.231830644 |
| Mrpl4         | 45.374   | 36.838   | 1.231717248 |
| Ppp2cb        | 63.4455  | 51.512   | 1.231664467 |
| Ccdc160       | 8.71     | 7.074    | 1.231269437 |
| H3f3b         | 91.627   | 74.4265  | 1.2311072   |
| Gpr125        | 2.0625   | 1.676    | 1.230608592 |
| Gm5124        | 65.7385  | 53.428   | 1.230412892 |
| Dusp8         | 25.825   | 20.9895  | 1.230377093 |
| Wdr70         | 15.3165  | 12.4495  | 1.230290373 |
| Manbal        | 15.3355  | 12.4655  | 1.23023545  |
| Doc2a         | 10.0235  | 8.1555   | 1.229047882 |
| Atg4b         | 10.577   | 8.6085   | 1.228669338 |
| Zfp768        | 4.9565   | 4.035    | 1.228376704 |
| Sf3a3         | 22.0035  | 17.9135  | 1.228319424 |
| Gnpda2        | 17.441   | 14.1995  | 1.228282686 |
| Rbbp4         | 21.309   | 17.354   | 1.227901348 |
| Gm8817        | 3.1745   | 2.5855   | 1.227808934 |
| Ubr4          | 23.2215  | 18.914   | 1.227741356 |
| Abcb6         | 1.262    | 1.028    | 1.227626459 |
| Kndc1         | 26.96    | 21.963   | 1.227519009 |
| Qpct          | 7.3985   | 6.0285   | 1.227253877 |
| Fn3k          | 40.723   | 33.1825  | 1.227243276 |
| Ifi20         | 208.6765 | 170.0425 | 1.227202023 |



|               |          |           |             |
|---------------|----------|-----------|-------------|
| Rrp12         | 5.718    | 4.6595    | 1.227170297 |
| Ankmy2        | 34.253   | 27.9305   | 1.226365443 |
| Ptges2        | 7.154    | 5.834     | 1.226259856 |
| Klhdc9        | 18.5065  | 15.092    | 1.226245693 |
| Gpx1          | 164.8465 | 134.4345  | 1.226221692 |
| Top1mt        | 15.6565  | 12.769    | 1.226133605 |
| Cnbp          | 146.1165 | 119.188   | 1.22593298  |
| Zdbf2         | 17.3105  | 14.1215   | 1.225825868 |
| Ndufv1        | 81.4505  | 66.4485   | 1.225768828 |
| Klhl11        | 27.826   | 22.7075   | 1.225410107 |
| Slc39a13      | 16.2255  | 13.241    | 1.225398384 |
| Faf1          | 12.299   | 10.04     | 1.225       |
| Phyhip        | 93.722   | 76.5195   | 1.224811976 |
| Mcrs1         | 8.6565   | 7.07      | 1.224398868 |
| Atpaf2        | 17.647   | 14.416    | 1.224125971 |
| Tmem39b       | 7.67     | 6.269     | 1.223480619 |
| Snca          | 88.744   | 72.5405   | 1.223371772 |
| N4bp2l1       | 20.187   | 16.5075   | 1.222898682 |
| Birc6         | 14.4015  | 11.778    | 1.222745797 |
| Chst1         | 26.9285  | 22.0235   | 1.222716644 |
| 42262         | 55.916   | 45.74     | 1.222474858 |
| Ctu1          | 2.7375   | 2.2395    | 1.222371065 |
| Rasl11a       | 1.9255   | 1.576     | 1.221763959 |
| Mrpl46        | 32.748   | 26.814    | 1.221302305 |
| Rftn1         | 7.744    | 6.343     | 1.220873404 |
| Cog1          | 13.262   | 10.864    | 1.220729013 |
| Wbscr16       | 5.9935   | 4.91      | 1.220672098 |
| Ube2b         | 116.711  | 95.6415   | 1.220296629 |
| Pcdhb16       | 2.004    | 1.6425    | 1.220091324 |
| Cstf1         | 9.9745   | 8.177     | 1.219823896 |
| Hspa8         | 1483.71  | 1216.5175 | 1.219637202 |
| 2310057J16Rik | 8.3385   | 6.8375    | 1.21952468  |
| Mios          | 5.512    | 4.5205    | 1.219334144 |
| Sez6l         | 50.9595  | 41.796    | 1.219243468 |
| Ergic3        | 107.7545 | 88.38     | 1.219218149 |
| Sema4a        | 12.4785  | 10.2355   | 1.21913927  |
| Dgkd          | 11.735   | 9.626     | 1.21909412  |
| Rfk           | 87.9515  | 72.156    | 1.218907645 |
| Trio          | 34.974   | 28.696    | 1.218776136 |
| Slc35c1       | 3.7145   | 3.048     | 1.218667979 |
| Gm5218        | 2.6905   | 2.208     | 1.218523551 |
| Gab3          | 2.945    | 2.417     | 1.218452627 |
| Stk32c        | 6.262    | 5.1395    | 1.21840646  |
| Slit3         | 3.3225   | 2.728     | 1.21792522  |
| Mthfd11       | 5.243    | 4.3065    | 1.217461976 |
| Odc1          | 40.0335  | 32.891    | 1.217156669 |
| Gm15483       | 1.2195   | 1.002     | 1.217065868 |
| 1110002N22Rik | 7.6315   | 6.2705    | 1.217048082 |
| Vdac1         | 329.682  | 270.907   | 1.216956372 |
| Phf10         | 12.9575  | 10.6495   | 1.21672379  |
| Gm1604b       | 17.311   | 14.2325   | 1.21630072  |
| Gsr           | 17.876   | 14.6975   | 1.216261269 |
| Tmem135       | 10.6915  | 8.792     | 1.216048681 |
| Cenpv         | 8.0715   | 6.6385    | 1.215862017 |
| Atp6v1c1      | 128.894  | 106.013   | 1.215832021 |

|               |          |          |             |
|---------------|----------|----------|-------------|
| Scnm1         | 34.641   | 28.501   | 1.215431038 |
| Ppp2r4        | 68.332   | 56.23    | 1.21522319  |
| Rpl19         | 389.8155 | 320.8165 | 1.215073103 |
| Napa          | 39.6215  | 32.6095  | 1.215029363 |
| 2610110G12Rik | 91.835   | 75.5855  | 1.214981709 |
| Psmc2         | 44.744   | 36.8315  | 1.214829697 |
| Spca3         | 15.865   | 13.0625  | 1.214545455 |
| Hibch         | 9.7595   | 8.036    | 1.214472374 |
| Mrpl24        | 21.126   | 17.397   | 1.214347301 |
| Cops3         | 52.8555  | 43.535   | 1.21409211  |
| Pdcd6         | 29.125   | 23.9915  | 1.213971615 |
| Prnp          | 96.4005  | 79.412   | 1.213928625 |
| Slc25a26      | 6.542    | 5.3895   | 1.213841729 |
| Eef1d         | 22.725   | 18.7305  | 1.213261792 |
| Lrrc68        | 10.6935  | 8.815    | 1.213102666 |
| Hist1h4k      | 3.576    | 2.948    | 1.21302578  |
| Syt4          | 3.1205   | 2.5725   | 1.213022352 |
| Gtl3          | 28.682   | 23.6455  | 1.213000359 |
| Ets1          | 1.484    | 1.224    | 1.212418301 |
| Gad2          | 461.7785 | 380.91   | 1.212303431 |
| Rrp7a         | 41.3685  | 34.133   | 1.211979609 |
| 42257         | 1.583    | 1.307    | 1.21117062  |
| Psap          | 214.9405 | 177.4785 | 1.211079088 |
| Gm10166       | 100.9665 | 83.371   | 1.211050605 |
| Cox7a1        | 3.9955   | 3.3      | 1.210757576 |
| Prkag1        | 19.2365  | 15.892   | 1.2104518   |
| Eif4g3        | 81.3725  | 67.2305  | 1.210350957 |
| Pld3          | 145.9575 | 120.597  | 1.210291301 |
| Snph          | 23.593   | 19.5135  | 1.209060394 |
| Cct6b         | 6.575    | 5.4405   | 1.208528628 |
| Atxn10        | 92.658   | 76.673   | 1.208482778 |
| Ptp4a3        | 7.3735   | 6.1015   | 1.208473326 |
| Ywhae         | 1174.521 | 971.93   | 1.208441966 |
| Rai2          | 7.853    | 6.4985   | 1.208432715 |
| Eno1          | 358.504  | 296.789  | 1.207942343 |
| Slc39a11      | 3.4105   | 2.8235   | 1.207897999 |
| Gm5093        | 15.7625  | 13.0515  | 1.207715588 |
| Cnpy3         | 26.888   | 22.264   | 1.207689544 |
| Eif4e         | 47.625   | 39.461   | 1.206887813 |
| Prdx1         | 100.2235 | 83.053   | 1.206741478 |
| Creld1        | 17.479   | 14.491   | 1.20619695  |
| Actr6         | 10.6105  | 8.799    | 1.205875668 |
| Pcdhb14       | 3.333    | 2.7645   | 1.205642973 |
| Donson        | 4.911    | 4.0735   | 1.205597152 |
| Mrps2         | 39.403   | 32.686   | 1.205500826 |
| Cacng3        | 30.69    | 25.4695  | 1.204970651 |
| Grid2         | 7.141    | 5.9265   | 1.204927023 |
| Rnf7          | 77.3045  | 64.1675  | 1.204729809 |
| Mlycd         | 5.7665   | 4.789    | 1.204113594 |
| Timm22        | 11.6275  | 9.659    | 1.203799565 |
| Gamt          | 9.7595   | 8.1075   | 1.203761949 |
| Gm10828       | 12.144   | 10.0895  | 1.203627534 |
| Mme           | 2.504    | 2.0805   | 1.203556837 |
| 0610037P05Rik | 40.477   | 33.653   | 1.202775384 |
| Tmem145       | 6.4585   | 5.371    | 1.202476261 |

|               |          |          |             |
|---------------|----------|----------|-------------|
| Rpl6          | 483.396  | 402.114  | 1.202136708 |
| Grid1         | 11.6685  | 9.707    | 1.202070671 |
| Hps6          | 4.344    | 3.6145   | 1.201825979 |
| Ppap2a        | 11.1265  | 9.258    | 1.201825448 |
| Thy1          | 352.1555 | 293.0655 | 1.201627281 |
| Tex264        | 11.702   | 9.7385   | 1.201622426 |
| Fam124a       | 5.289    | 4.404    | 1.200953678 |
| Ptms          | 155.2835 | 129.3045 | 1.200913348 |
| Aplp2         | 123.156  | 102.562  | 1.200795616 |
| Ptprf         | 8.3075   | 6.9185   | 1.200766062 |
| Hspa5         | 63.005   | 52.4745  | 1.200678425 |
| Arl6ip4       | 48.184   | 40.131   | 1.200667813 |
| Pop4          | 16.7755  | 13.9725  | 1.200608338 |
| Pcdhb2        | 1.5535   | 1.294    | 1.200540958 |
| Dcaf15        | 3.242    | 2.701    | 1.200296187 |
| Grik3         | 25.309   | 21.0875  | 1.200189686 |
| Klc1          | 177.9695 | 148.288  | 1.200161173 |
| Gm10193       | 5.977    | 4.9815   | 1.199839406 |
| Gpr123        | 27.6095  | 23.0335  | 1.198667159 |
| Pex11b        | 18.79    | 15.6765  | 1.198609383 |
| Ccdc65        | 9.9725   | 8.321    | 1.198473741 |
| Ddx28         | 5.0795   | 4.2385   | 1.198419252 |
| Cntn6         | 3.656    | 3.051    | 1.198295641 |
| Rfx2          | 1.304    | 1.0885   | 1.19797887  |
| Ppp4r4        | 7.266    | 6.0655   | 1.197922677 |
| Sulf2         | 23.9975  | 20.041   | 1.197420288 |
| Tsc2          | 12.9545  | 10.8215  | 1.19710761  |
| Lrrtm4        | 17.6625  | 14.7545  | 1.197092412 |
| Mpi           | 19.6425  | 16.41    | 1.196983547 |
| Hexim2        | 19.1305  | 15.9845  | 1.196815665 |
| Gm5615        | 2.277    | 1.903    | 1.196531792 |
| Ints3         | 17.607   | 14.7155  | 1.196493493 |
| Mast1         | 31.7665  | 26.556   | 1.196208013 |
| Slc1a4        | 16.6385  | 13.915   | 1.195724039 |
| Ptcd2         | 18.57    | 15.5325  | 1.195557702 |
| Bcl11b        | 6.666    | 5.577    | 1.195266272 |
| Dtx3          | 31.2035  | 26.1065  | 1.195238734 |
| Bcat1         | 32.12    | 26.8735  | 1.195229501 |
| Slc39a10      | 21.6655  | 18.1335  | 1.194777622 |
| Cntnap2       | 37.673   | 31.538   | 1.194527237 |
| Rilpl2        | 5.1145   | 4.283    | 1.194139622 |
| Insig2        | 16.8385  | 14.101   | 1.194135168 |
| Pcif1         | 10.773   | 9.0235   | 1.19388264  |
| Ccdc32        | 24.3775  | 20.4195  | 1.193834325 |
| Zbtb39        | 4.698    | 3.9355   | 1.193749206 |
| 2510006D16Rik | 102.4575 | 85.8435  | 1.193538241 |
| Ak5           | 18.169   | 15.223   | 1.193522959 |
| Gm7555        | 1.5705   | 1.316    | 1.193389058 |
| Lingo1        | 36.853   | 30.893   | 1.192923963 |
| Elmo1         | 158.34   | 132.735  | 1.192903153 |
| Prdx4         | 5.6295   | 4.7195   | 1.192817036 |
| Bcs1l         | 5.308    | 4.4505   | 1.19267498  |
| Rpl7l1        | 17.8605  | 14.976   | 1.192608173 |
| Dcaf4         | 9.71     | 8.144    | 1.192288802 |
| Prosapip1     | 9.0685   | 7.6075   | 1.192047322 |

|               |          |          |             |
|---------------|----------|----------|-------------|
| Setd1a        | 23.5175  | 19.732   | 1.191845733 |
| Ubl3          | 72.375   | 60.73    | 1.19175037  |
| Camkk2        | 6.9665   | 5.8475   | 1.191363831 |
| Kctd7         | 3.448    | 2.895    | 1.191018998 |
| Abcg4         | 17.871   | 15.01    | 1.190606262 |
| Gm10136       | 11.352   | 9.535    | 1.190561091 |
| Polr2b        | 30.447   | 25.574   | 1.190545085 |
| Foxg1         | 22.1985  | 18.6465  | 1.190491513 |
| Tprgl         | 70.8715  | 59.5355  | 1.190407404 |
| Nudt15        | 2.6695   | 2.243    | 1.190147124 |
| Odz4          | 14.071   | 11.823   | 1.190137867 |
| Ccrn4l        | 19.534   | 16.414   | 1.190081638 |
| Fosb          | 1.885    | 1.585    | 1.189274448 |
| Clip2         | 15.774   | 13.2645  | 1.189189189 |
| Dlgap4        | 41.0125  | 34.4915  | 1.189061073 |
| Mrps17        | 27.1375  | 22.8245  | 1.188963614 |
| Ccdc43        | 6.525    | 5.489    | 1.188741119 |
| Kti12         | 4.5735   | 3.8485   | 1.188385085 |
| BC052040      | 7.384    | 6.2135   | 1.18838014  |
| Mink1         | 15.227   | 12.8135  | 1.188356031 |
| Ftsj2         | 6.747    | 5.6785   | 1.188165889 |
| Lmo3          | 51.869   | 43.661   | 1.187993862 |
| Gpr176        | 5.515    | 4.6425   | 1.187937534 |
| Prr14         | 16.598   | 13.9735  | 1.187819802 |
| Isoc2b        | 3.1405   | 2.644    | 1.187783661 |
| Hpca          | 229.7315 | 193.4445 | 1.187583519 |
| 4930453N24Rik | 13.059   | 10.997   | 1.187505683 |
| Dlx1          | 49.059   | 41.318   | 1.18735176  |
| Ank3          | 73.4685  | 61.884   | 1.187197014 |
| Hars          | 55.176   | 46.4775  | 1.187155075 |
| 2810002N01Rik | 36.439   | 30.7025  | 1.186841462 |
| Baiap3        | 24.4525  | 20.6065  | 1.186640138 |
| Rab26         | 21.6875  | 18.286   | 1.186016625 |
| Cdk20         | 3.7925   | 3.1985   | 1.185712053 |
| Sez6l2        | 61.018   | 51.4655  | 1.185609777 |
| Srd5a3        | 4.0725   | 3.435    | 1.18558952  |
| Wdr45         | 21.029   | 17.738   | 1.185533882 |
| Tox2          | 74.852   | 63.145   | 1.185398686 |
| Mt1           | 100.1275 | 84.468   | 1.185389733 |
| Pml           | 2.8555   | 2.409    | 1.185346617 |
| Ubl7          | 122.4415 | 103.304  | 1.185254201 |
| Pcbp2         | 124.8635 | 105.349  | 1.185236689 |
| Son           | 25.1015  | 21.1835  | 1.184955272 |
| St8sia3       | 64.861   | 54.7415  | 1.18485975  |
| Med19         | 12.82    | 10.8205  | 1.184788134 |
| Tmem179b      | 3.92     | 3.309    | 1.18464793  |
| Btbd2         | 19.564   | 16.515   | 1.184620042 |
| Rgmb          | 8.6725   | 7.322    | 1.184444141 |
| Rmnd5b        | 8.499    | 7.1765   | 1.184282032 |
| Vps28         | 164.043  | 138.588  | 1.183673911 |
| Pip5k1b       | 13.2985  | 11.24    | 1.183140569 |
| Retsat        | 2.9565   | 2.499    | 1.183073229 |
| Ubox5         | 3.151    | 2.6635   | 1.183029848 |
| Rarb          | 2.745    | 2.321    | 1.182679879 |
| Amn1          | 14.909   | 12.611   | 1.18222187  |

|               |          |          |             |
|---------------|----------|----------|-------------|
| BC018242      | 29.783   | 25.2135  | 1.181232276 |
| Pkib          | 7.3755   | 6.244    | 1.181213965 |
| 4930572J05Rik | 6.86     | 5.8085   | 1.181027804 |
| Pip4k2b       | 74.7135  | 63.2785  | 1.180709088 |
| Rbm15b        | 5.799    | 4.9115   | 1.180698361 |
| Srgap1        | 8.7925   | 7.4475   | 1.180597516 |
| Gpi1          | 201.5005 | 170.6775 | 1.180592052 |
| Slc27a2       | 6.027    | 5.1065   | 1.180260452 |
| Polrmt        | 2.328    | 1.9725   | 1.180228137 |
| Aatf          | 20.3055  | 17.2075  | 1.180037774 |
| Thoc5         | 10.354   | 8.778    | 1.179539758 |
| Churc1        | 117.235  | 99.3905  | 1.179539292 |
| Slc26a11      | 4.353    | 3.6905   | 1.179514971 |
| Ldb3          | 6.033    | 5.1155   | 1.179356857 |
| Dpysl4        | 5.014    | 4.2515   | 1.179348465 |
| Scn2b         | 92.671   | 78.6195  | 1.178727924 |
| Gpr139        | 6.346    | 5.385    | 1.178458682 |
| Polr1c        | 23.598   | 20.0305  | 1.178103392 |
| D19Bwg1357e   | 9.3485   | 7.937    | 1.177837974 |
| Mull          | 6.1005   | 5.18     | 1.177702703 |
| Gpr137        | 16.1195  | 13.69    | 1.177465303 |
| Cdkn2d        | 20.0085  | 16.9965  | 1.177212956 |
| Arhgap33      | 15.447   | 13.1225  | 1.177138503 |
| Ykt6          | 25.701   | 21.835   | 1.177055187 |
| Pcmt1         | 64.529   | 54.831   | 1.176870748 |
| Ech1          | 16.8935  | 14.357   | 1.1766734   |
| Rtn3          | 350.7585 | 298.1435 | 1.176475422 |
| Med12         | 2.6865   | 2.284    | 1.176225919 |
| Mtif3         | 9.1885   | 7.812    | 1.176203277 |
| Cpsf1         | 9.6255   | 8.185    | 1.17599267  |
| Vangl2        | 11.7625  | 10.003   | 1.175897231 |
| Hat1          | 14.496   | 12.3315  | 1.175526092 |
| Klhl13        | 58.7045  | 49.952   | 1.175218209 |
| Grb10         | 76.488   | 65.105   | 1.174840642 |
| Fancg         | 3.538    | 3.012    | 1.174634794 |
| Tmem93        | 15.965   | 13.5915  | 1.174631203 |
| Brs3          | 2.733    | 2.327    | 1.174473571 |
| Actb          | 1047.651 | 892.089  | 1.174379462 |
| Heatr5b       | 15.161   | 12.91    | 1.174360961 |
| Pde10a        | 12.9345  | 11.0145  | 1.174315675 |
| Fcf1          | 23.7665  | 20.241   | 1.174176177 |
| 1300018I17Rik | 6.7485   | 5.7485   | 1.173958424 |
| Gm14446       | 4.606    | 3.9235   | 1.173951829 |
| Vstm2b        | 21.2925  | 18.1415  | 1.173690158 |
| Nnat          | 511.2885 | 435.6895 | 1.173515772 |
| Rsl1          | 1.556    | 1.326    | 1.173453997 |
| Hsd17b4       | 16.716   | 14.246   | 1.173382002 |
| Slc39a9       | 12.8885  | 10.989   | 1.172854673 |
| Eif3k         | 126.988  | 108.278  | 1.172795951 |
| Atp5s         | 17.2455  | 14.7095  | 1.172405588 |
| Hlcs          | 5.1765   | 4.4155   | 1.172347413 |
| Rps23         | 417.608  | 356.289  | 1.172104668 |
| Adam9         | 5.2645   | 4.492    | 1.171972395 |
| Sefd1         | 13.293   | 11.343   | 1.171912193 |
| Usp33         | 36.6385  | 31.2645  | 1.171888244 |

|               |          |         |             |
|---------------|----------|---------|-------------|
| 42256         | 17.194   | 14.6775 | 1.171452904 |
| Kank3         | 1.418    | 1.2105  | 1.17141677  |
| C030048B08Rik | 6.3625   | 5.4315  | 1.17140753  |
| Wbscr17       | 7.3995   | 6.318   | 1.171177588 |
| Psme4         | 4.9255   | 4.206   | 1.171065145 |
| Pole3         | 13.3625  | 11.4115 | 1.170967883 |
| Ndst3         | 4.976    | 4.25    | 1.170823529 |
| Zrsr1         | 45.5635  | 38.9185 | 1.170741421 |
| Epn1          | 27.577   | 23.5555 | 1.170724459 |
| Gps1          | 27.0835  | 23.141  | 1.17036861  |
| Blcap         | 75.921   | 64.879  | 1.170193745 |
| Tbc1d22b      | 19.9475  | 17.0495 | 1.169975659 |
| Bcor          | 4.097    | 3.5035  | 1.169402027 |
| Hnrnpab       | 81.7055  | 69.8975 | 1.168933081 |
| Isyna1        | 25.816   | 22.0875 | 1.168805886 |
| Ptcd3         | 17.899   | 15.3165 | 1.168609016 |
| 2010011I20Rik | 10.847   | 9.2845  | 1.168291238 |
| Chchd8        | 7.4385   | 6.3675  | 1.16819788  |
| Mtap1b        | 484.7875 | 415.078 | 1.167943134 |
| Saal1         | 1.5405   | 1.319   | 1.16793025  |
| Npas1         | 1.5515   | 1.3285  | 1.167858487 |
| Ggct          | 20.826   | 17.8425 | 1.167213115 |
| Ppp2r2b       | 84.17    | 72.1125 | 1.167204021 |
| BC048355      | 6.1515   | 5.2705  | 1.167156816 |
| Ube2ql1       | 44.1945  | 37.868  | 1.167067181 |
| Prpf6         | 20.468   | 17.55   | 1.166267806 |
| Rsph9         | 15.673   | 13.4405 | 1.166102452 |
| Ggcx          | 5.1495   | 4.416   | 1.166100543 |
| Zfpm2         | 6.4005   | 5.489   | 1.166059392 |
| Rnf4          | 45.692   | 39.191  | 1.165879921 |
| Daglb         | 4.461    | 3.8265  | 1.165817327 |
| Phospho2      | 12.1645  | 10.436  | 1.165628593 |
| Siah1a        | 19.4455  | 16.683  | 1.165587724 |
| 3110082I17Rik | 13.6475  | 11.71   | 1.165456874 |
| Mett10d       | 29.395   | 25.225  | 1.16531219  |
| Parp8         | 20.876   | 17.9155 | 1.16524797  |
| Muted         | 11.379   | 9.7655  | 1.165224515 |
| Zfp746        | 4.6495   | 3.9905  | 1.165142213 |
| Ttc13         | 3.762    | 3.23    | 1.164705882 |
| Ptprs         | 40.1585  | 34.482  | 1.164622122 |
| Pak1          | 218.2115 | 187.431 | 1.164223101 |
| Icam5         | 2.3185   | 1.9915  | 1.164197841 |
| Nt5c3         | 11.2845  | 9.693   | 1.164190653 |
| H1f0          | 60.843   | 52.2675 | 1.16406945  |
| Rab2a         | 357.4095 | 307.115 | 1.163764388 |
| Dnaja4        | 9.7305   | 8.3625  | 1.163587444 |
| Psmc14        | 53.148   | 45.6805 | 1.163472379 |
| Ube2e1        | 29.6875  | 25.519  | 1.163348877 |
| Ppan          | 3.628    | 3.119   | 1.163193331 |
| Ganab         | 15.396   | 13.2425 | 1.162620351 |
| Usp46         | 27.581   | 23.7245 | 1.162553478 |
| Acd           | 20.2615  | 17.43   | 1.162449799 |
| Mat2b         | 22.6555  | 19.4905 | 1.162386804 |
| Sacs          | 4.5265   | 3.8955  | 1.161981774 |
| Rprml         | 4.6845   | 4.032   | 1.161830357 |

|               |          |          |             |
|---------------|----------|----------|-------------|
| Dhcr24        | 20.633   | 17.7595  | 1.161800726 |
| Trim3         | 25.861   | 22.2685  | 1.161326537 |
| Eef1a2        | 104.1095 | 89.666   | 1.161081123 |
| LOC100504629  | 3.5315   | 3.042    | 1.160913872 |
| Nup214        | 10.2985  | 8.872    | 1.160786745 |
| Arhgap42      | 1.6895   | 1.4555   | 1.160769495 |
| Psmc2         | 76.255   | 65.6935  | 1.16076933  |
| Tctn3         | 2.3045   | 1.9855   | 1.16066482  |
| 1110018J18Rik | 4.4455   | 3.8305   | 1.160553453 |
| Mta2          | 7.6485   | 6.591    | 1.160446063 |
| Kit           | 4.7775   | 4.117    | 1.160432354 |
| Ndst2         | 3.018    | 2.601    | 1.160322953 |
| Prkcd         | 3.7925   | 3.2685   | 1.160318189 |
| Tmem66        | 61.5435  | 53.0495  | 1.16011461  |
| Smap2         | 93.594   | 80.694   | 1.159863187 |
| Ppp6c         | 24.623   | 21.2345  | 1.15957522  |
| Prr24         | 50.0665  | 43.1865  | 1.159309043 |
| G3bp1         | 22.9045  | 19.7575  | 1.159281286 |
| Minpp1        | 18.907   | 16.314   | 1.158943239 |
| Gm11818       | 11.014   | 9.5035   | 1.158941443 |
| Myo5a         | 71.0985  | 61.3605  | 1.158701445 |
| 2900011O08Rik | 244.686  | 211.21   | 1.158496283 |
| Nsg1          | 127.1305 | 109.7405 | 1.158464742 |
| Gm12657       | 3.96     | 3.419    | 1.158233402 |
| Ilf3          | 51.953   | 44.861   | 1.158088317 |
| Spg7          | 4.132    | 3.568    | 1.158071749 |
| Ublcp1        | 41.0775  | 35.4745  | 1.157944439 |
| Pcbp1         | 67.4655  | 58.275   | 1.157709138 |
| Scg5          | 93.0235  | 80.352   | 1.157699871 |
| Dnalc4        | 12.4695  | 10.771   | 1.157691951 |
| Rgs2          | 73.445   | 63.451   | 1.157507368 |
| Psmd5         | 41.7235  | 36.055   | 1.157218139 |
| Cdc42se2      | 29.371   | 25.383   | 1.157113028 |
| 2310001A20Rik | 15.783   | 13.641   | 1.157026611 |
| Gstm6         | 40.1885  | 34.7415  | 1.156786552 |
| Tle4          | 33.2215  | 28.722   | 1.156656918 |
| Golt1b        | 23.0075  | 19.898   | 1.156271987 |
| Coq6          | 5.6765   | 4.91     | 1.15610998  |
| Bag1          | 90.427   | 78.225   | 1.155985938 |
| Sdf2          | 24.9465  | 21.582   | 1.1558938   |
| Gm5566        | 3.541    | 3.0635   | 1.155867472 |
| Tusc2         | 20.8165  | 18.0095  | 1.155862184 |
| Txnl4b        | 12.7045  | 10.9955  | 1.15542722  |
| 2010012O05Rik | 42.319   | 36.627   | 1.155404483 |
| Mta1          | 19.091   | 16.524   | 1.155349794 |
| Mfsd5         | 12.533   | 10.8495  | 1.155168441 |
| Trmt112       | 86.967   | 75.2865  | 1.155147337 |
| Arpc2         | 126.2685 | 109.3355 | 1.154871931 |
| Caskin1       | 43.0655  | 37.291   | 1.154849696 |
| Rps10         | 358.485  | 310.4545 | 1.154710272 |
| Gbf1          | 25.7705  | 22.321   | 1.154540567 |
| Zfp770        | 10.3425  | 8.961    | 1.154168062 |
| Mrps27        | 12.709   | 11.0125  | 1.154052213 |
| Tada2a        | 10.4535  | 9.059    | 1.153935313 |
| Cdh24         | 3.1135   | 2.6995   | 1.153361734 |

|               |          |          |             |
|---------------|----------|----------|-------------|
| Uap111        | 9.8615   | 8.5525   | 1.153054662 |
| Ankrd13b      | 9.086    | 7.88     | 1.153045685 |
| Pqlc2         | 1.541    | 1.3365   | 1.153011597 |
| 2310040G07Rik | 2.635    | 2.2855   | 1.152920586 |
| Exosc5        | 4.5615   | 3.9565   | 1.152912928 |
| Parp11        | 8.7365   | 7.5815   | 1.152344523 |
| Slc25a22      | 30.9605  | 26.869   | 1.152275857 |
| Disp2         | 111.0785 | 96.4025  | 1.152236716 |
| Thoc7         | 65.47    | 56.8245  | 1.152143882 |
| Gga3          | 16.4845  | 14.3085  | 1.152077436 |
| Tcta          | 9.3895   | 8.151    | 1.151944547 |
| Abhd6         | 8.7855   | 7.627    | 1.151894585 |
| Rab9          | 76.72    | 66.6225  | 1.15156291  |
| Akap11        | 30.726   | 26.6835  | 1.151498117 |
| Taf6          | 22.785   | 19.7895  | 1.15136815  |
| Dynlt1e       | 29.5595  | 25.6755  | 1.151272614 |
| Tcfcp2        | 8.8705   | 7.7075   | 1.150891988 |
| Amd1          | 22.328   | 19.4025  | 1.150779539 |
| Mtap7d1       | 59.149   | 51.4375  | 1.149919806 |
| Hgsnat        | 13.685   | 11.9015  | 1.14985506  |
| Dcaf11        | 9.9775   | 8.68     | 1.149481567 |
| Sh2b2         | 2.54     | 2.21     | 1.149321267 |
| Ddx41         | 9.691    | 8.432    | 1.149312144 |
| Polr3a        | 5.1325   | 4.467    | 1.148981419 |
| Dguok         | 6.758    | 5.882    | 1.148928936 |
| Tcf25         | 448.0605 | 390.0215 | 1.148809745 |
| Lrrc4b        | 61.0575  | 53.171   | 1.148323334 |
| Suds3         | 21.748   | 18.946   | 1.147894015 |
| Ppfia3        | 12.037   | 10.488   | 1.147692601 |
| Susd2         | 14.8315  | 12.9265  | 1.147371678 |
| Glo1          | 57.117   | 49.785   | 1.147273275 |
| Kctd16        | 7.14     | 6.225    | 1.146987952 |
| Ccdc74a       | 7.2925   | 6.3595   | 1.146709647 |
| Kctd17        | 17.064   | 14.882   | 1.146620078 |
| Mpv17         | 61.128   | 53.3155  | 1.146533372 |
| Gm4581        | 3.4635   | 3.021    | 1.146474677 |
| Fsd1          | 21.2175  | 18.5075  | 1.146427124 |
| Eif2a         | 36.4305  | 31.7795  | 1.146352208 |
| Osbp12        | 36.5255  | 31.87    | 1.146077816 |
| LOC100233175  | 40.3515  | 35.21    | 1.146023857 |
| Spnb2         | 64.026   | 55.8755  | 1.145868941 |
| Mettl5        | 10.0175  | 8.743    | 1.145773762 |
| Tmed4         | 45.3975  | 39.6245  | 1.14569269  |
| Rpn2          | 24.358   | 21.2705  | 1.145154087 |
| Pabpc112b-ps  | 53.713   | 46.9125  | 1.144961364 |
| Git2          | 12.7435  | 11.131   | 1.14486569  |
| Fam119a       | 4.5245   | 3.9525   | 1.144718533 |
| Fam69a        | 8.895    | 7.771    | 1.144640329 |
| Psm4          | 67.7185  | 59.18    | 1.144280162 |
| Tmem128       | 7.352    | 6.425    | 1.144280156 |
| Mchr1         | 4.109    | 3.591    | 1.144249513 |
| Mrpl3         | 24.4795  | 21.4095  | 1.143394288 |
| Chd8          | 13.894   | 12.1525  | 1.143303847 |
| D18Ertd653e   | 4.9695   | 4.3475   | 1.14307073  |
| Lias          | 31.7715  | 27.7985  | 1.142921381 |



|               |          |          |             |
|---------------|----------|----------|-------------|
| Fam115a       | 68.633   | 60.051   | 1.142911858 |
| LOC100502936  | 1.7585   | 1.539    | 1.142625081 |
| Smpd1         | 32.154   | 28.1435  | 1.142501821 |
| Nup54         | 8.5625   | 7.4955   | 1.142352078 |
| Enc1          | 34.507   | 30.2155  | 1.142029753 |
| Megf8         | 8.4125   | 7.368    | 1.141761672 |
| Lrrc28        | 12.924   | 11.3195  | 1.141746544 |
| Adprh         | 31.2665  | 27.3885  | 1.141592274 |
| 4922501L14Rik | 12.015   | 10.5255  | 1.141513467 |
| Rpl26         | 319.711  | 280.1045 | 1.141399014 |
| Hdhd2         | 43.7845  | 38.3605  | 1.141395446 |
| Bsg           | 209.0035 | 183.1125 | 1.141393952 |
| Ptpn5         | 51.8525  | 45.433   | 1.141295974 |
| Terf1         | 9.433    | 8.2675   | 1.140973692 |
| Ypel5         | 54.214   | 47.519   | 1.140891012 |
| Atp6v0d1      | 182.8645 | 160.296  | 1.140792659 |
| Mtmr1         | 6.8355   | 5.992    | 1.140771028 |
| Ugcg          | 28.001   | 24.5465  | 1.140732895 |
| Pnpla8        | 15.0525  | 13.1955  | 1.140729794 |
| Trmt5         | 8.1305   | 7.1275   | 1.140722553 |
| Psg16         | 1.1405   | 1        | 1.1405      |
| Tram111       | 16.3135  | 14.304   | 1.140485179 |
| Gnas          | 1934.572 | 1696.758 | 1.140157878 |
| Lymr1         | 10.1195  | 8.876    | 1.14009689  |
| Gpr25         | 9.4835   | 8.3195   | 1.139912254 |
| Gm5428        | 1.373    | 1.2045   | 1.139892071 |
| Naa38         | 18.0855  | 15.8715  | 1.139495322 |
| 3110043O21Rik | 7.431    | 6.5215   | 1.13946178  |
| Slc25a3       | 254.84   | 223.7005 | 1.139201745 |
| Wdr85         | 8.175    | 7.1765   | 1.139134676 |
| Mal2          | 22.3365  | 19.61    | 1.139036206 |
| Hmgn3         | 34.3385  | 30.153   | 1.138808742 |
| Eral1         | 8.618    | 7.569    | 1.138591624 |
| Rars          | 25.344   | 22.2685  | 1.138109886 |
| 2310057M21Rik | 21.4885  | 18.8835  | 1.137951121 |
| Slc6a15       | 6.5045   | 5.716    | 1.137946116 |
| Zw10          | 3.897    | 3.4255   | 1.13764414  |
| 2010321M09Rik | 11.59    | 10.188   | 1.137612878 |
| Cend1         | 722.954  | 635.5035 | 1.137608211 |
| Aco2          | 141.2905 | 124.228  | 1.137348263 |
| Cct6a         | 39.0985  | 34.3815  | 1.137195876 |
| Fis1          | 81.7595  | 71.8995  | 1.137135863 |
| Phb           | 64.652   | 56.871   | 1.136818414 |
| Gpr101        | 12.493   | 10.991   | 1.136657265 |
| Fbxo31        | 6.379    | 5.614    | 1.136266477 |
| AI894139      | 4.165    | 3.6665   | 1.135960725 |
| Anapc4        | 21.681   | 19.09    | 1.135725511 |
| Copg2         | 16.2085  | 14.2725  | 1.135645472 |
| Amph          | 40.864   | 36.0025  | 1.135032289 |
| Hnrnp1        | 34.4715  | 30.3715  | 1.134994979 |
| Gphn          | 15.4025  | 13.574   | 1.134706056 |
| Polr3b        | 5.9215   | 5.219    | 1.13460433  |
| Zfp286        | 4.0865   | 3.602    | 1.134508606 |
| Kdelr2        | 24.8505  | 21.9145  | 1.133975222 |
| Ptprk         | 9.4265   | 8.313    | 1.13394683  |

|               |          |          |             |
|---------------|----------|----------|-------------|
| Pde4a         | 58.2695  | 51.388   | 1.133912587 |
| Khdrbs1       | 51.8745  | 45.7515  | 1.133831678 |
| Dstn          | 89.1045  | 78.6215  | 1.133335029 |
| Dner          | 39.185   | 34.592   | 1.132776364 |
| Gsk3a         | 129.2485 | 114.099  | 1.132775046 |
| Dpm1          | 11.8915  | 10.498   | 1.132739569 |
| Surf4         | 14.876   | 13.1335  | 1.132675981 |
| Gfod2         | 3.6455   | 3.219    | 1.132494564 |
| Bhlhe41       | 8.388    | 7.4075   | 1.132365845 |
| Vps72         | 27.2235  | 24.0475  | 1.132071941 |
| Btbd10        | 8.046    | 7.109    | 1.131804755 |
| Tbp11         | 42.6295  | 37.6665  | 1.131761645 |
| Mocs2         | 44.617   | 39.4275  | 1.13162133  |
| Gemin7        | 17.5785  | 15.537   | 1.131396022 |
| Cnih          | 14.036   | 12.4065  | 1.131342441 |
| Itfg1         | 40.4175  | 35.726   | 1.131318927 |
| Kpna6         | 31.3405  | 27.705   | 1.131221801 |
| Lgr5          | 1.51     | 1.335    | 1.131086142 |
| Atg5          | 9.0845   | 8.032    | 1.131038347 |
| Sox4          | 2.707    | 2.3935   | 1.130979737 |
| Exoc2         | 18.5735  | 16.4235  | 1.130909977 |
| Foxred2       | 7.738    | 6.844    | 1.130625365 |
| Slc25a25      | 24.3695  | 21.56    | 1.130310761 |
| 4933434E20Rik | 29.6155  | 26.204   | 1.130190047 |
| Tbl1x         | 52.134   | 46.131   | 1.130129414 |
| Dnahc1        | 3.188    | 2.821    | 1.130095711 |
| Nipal3        | 17.47    | 15.4645  | 1.129684115 |
| Gtf2h1        | 11.0705  | 9.8025   | 1.129354756 |
| 5133401N09Rik | 17.172   | 15.2065  | 1.129253937 |
| Drd2          | 14.1855  | 12.5625  | 1.12919403  |
| Fam76a        | 22.024   | 19.51    | 1.128856996 |
| Zfand1        | 15.235   | 13.498   | 1.128685731 |
| LOC100502825  | 103.2535 | 91.484   | 1.128650912 |
| Phlda3        | 24.005   | 21.2695  | 1.128611392 |
| B3gnt1        | 19.8665  | 17.6045  | 1.128489875 |
| Acat1         | 45.6915  | 40.4915  | 1.128422015 |
| 1810020D17Rik | 21.798   | 19.3175  | 1.128406885 |
| Gmppa         | 14.9625  | 13.2605  | 1.128351118 |
| Naf1          | 3.1105   | 2.757    | 1.128219079 |
| Fos           | 5.024    | 4.4535   | 1.128101493 |
| Nfya          | 7.1385   | 6.328    | 1.128081542 |
| Dgcr2         | 14.018   | 12.427   | 1.128027682 |
| Tmem18        | 8.1195   | 7.1995   | 1.127786652 |
| Gtpbp4        | 31.5095  | 27.9475  | 1.127453261 |
| Fkbp11        | 2.2775   | 2.0205   | 1.127196239 |
| Sdhaf1        | 4.897    | 4.3445   | 1.127172287 |
| Hivep2        | 15.205   | 13.492   | 1.126964127 |
| Pnpt1         | 3.0725   | 2.727    | 1.126696003 |
| Zbtb4         | 21.91    | 19.456   | 1.126130757 |
| Tmed2         | 23.254   | 20.6555  | 1.125801845 |
| 3300002I08Rik | 2.117    | 1.8805   | 1.125764424 |
| Gne           | 17.467   | 15.5165  | 1.125704895 |
| 2700097O09Rik | 4.546    | 4.0385   | 1.12566547  |
| Gm13654       | 238.4975 | 211.8735 | 1.125659887 |
| Ttc33         | 27.9825  | 24.8635  | 1.125444929 |

|               |          |         |             |
|---------------|----------|---------|-------------|
| Sorl1         | 8.901    | 7.909   | 1.125426729 |
| Cct6a         | 405.412  | 360.263 | 1.125322334 |
| Serpinb1b     | 4.5685   | 4.0605  | 1.125107745 |
| Ccdc138       | 1.7035   | 1.5145  | 1.124793661 |
| Syt4          | 61.3825  | 54.5795 | 1.124643868 |
| Fbxo18        | 9.845    | 8.755   | 1.124500286 |
| Zfp580        | 11.281   | 10.036  | 1.124053408 |
| Crlf2         | 2.139    | 1.903   | 1.124014714 |
| Thumpd3       | 6.351    | 5.651   | 1.123871881 |
| Hecw1         | 7.84     | 6.977   | 1.123692131 |
| Bid           | 11.429   | 10.173  | 1.123464072 |
| Inpp5j        | 12.3105  | 10.961  | 1.123118329 |
| Arpc5         | 77.375   | 68.9025 | 1.122963608 |
| Gng4          | 57.7065  | 51.392  | 1.122869318 |
| Trit1         | 6.5295   | 5.8165  | 1.122582309 |
| Sec23ip       | 13.055   | 11.6315 | 1.122383184 |
| Snrpb         | 19.478   | 17.3565 | 1.122230865 |
| Tmem223       | 36.6315  | 32.6425 | 1.12220265  |
| Apoa2         | 1.5385   | 1.371   | 1.122173596 |
| Rchy1         | 13.432   | 11.975  | 1.121670146 |
| Gmn           | 1.5635   | 1.394   | 1.121592539 |
| Thrap3        | 48.5765  | 43.314  | 1.121496514 |
| Poll          | 3.881    | 3.461   | 1.12135221  |
| Cadps2        | 32.863   | 29.3075 | 1.121317069 |
| Ppil3         | 20.1005  | 17.9265 | 1.121272976 |
| Rrs1          | 9.3125   | 8.3055  | 1.121244958 |
| Rab14         | 102.412  | 91.3425 | 1.121186742 |
| Mcf2l         | 13.1675  | 11.748  | 1.120829077 |
| Cript         | 68.0905  | 60.755  | 1.120739034 |
| Eif2b3        | 7.611    | 6.7915  | 1.120665538 |
| Gpr85         | 4.395    | 3.9225  | 1.120458891 |
| Atp6v1a       | 126.6455 | 113.033 | 1.120429432 |
| Nop16         | 14.2665  | 12.7355 | 1.120215147 |
| Ccdc104       | 133.4815 | 119.172 | 1.120074346 |
| Ppip5k1       | 17.282   | 15.4295 | 1.120062218 |
| 2310035C23Rik | 12.9775  | 11.587  | 1.120005178 |
| Lrrc49        | 15.644   | 13.968  | 1.119988545 |
| Dab2ip        | 19.0995  | 17.07   | 1.118892794 |
| Ap3s1         | 23.3755  | 20.8935 | 1.118792926 |
| Gm11449       | 1.3895   | 1.242   | 1.118760064 |
| Txn14a        | 40.1265  | 35.871  | 1.118633436 |
| Grhl1         | 2.818    | 2.5195  | 1.118475888 |
| Arc           | 5.3785   | 4.811   | 1.117958844 |
| Msh3          | 3.069    | 2.7455  | 1.117829175 |
| Ftsjd2        | 31.1935  | 27.906  | 1.117806207 |
| E130309D02Rik | 11.904   | 10.6515 | 1.117589072 |
| Ift88         | 6.803    | 6.0875  | 1.117535934 |
| Kcnab1        | 9.425    | 8.436   | 1.117235657 |
| Pigh          | 4.1415   | 3.707   | 1.117210682 |
| Arhgdia       | 245.98   | 220.184 | 1.11715656  |
| D0H4S114      | 48.4855  | 43.401  | 1.117151679 |
| Grina         | 123.646  | 110.691 | 1.117037519 |
| Tenc1         | 2.234    | 2       | 1.117       |
| Dvl1          | 6.215    | 5.5645  | 1.116901788 |
| Hmgb3         | 46.5485  | 41.702  | 1.116217448 |

|               |          |          |             |
|---------------|----------|----------|-------------|
| Lsm12         | 102.973  | 92.2545  | 1.116184034 |
| Dnajb6        | 106.6695 | 95.572   | 1.116116645 |
| Rpusd3        | 2.2895   | 2.0515   | 1.116012674 |
| Traf3ip1      | 13.0815  | 11.722   | 1.115978502 |
| Reep2         | 72.428   | 64.904   | 1.115925059 |
| Dync2li1      | 10.4085  | 9.3285   | 1.11577424  |
| Gabrg3        | 13.875   | 12.436   | 1.115712448 |
| Cstad         | 5.8565   | 5.2495   | 1.11563006  |
| Fen1          | 2.268    | 2.0335   | 1.115318417 |
| Ldb2          | 49.4675  | 44.3565  | 1.115225502 |
| Scap          | 10.711   | 9.607    | 1.114916207 |
| Cd1d1         | 1.1365   | 1.0195   | 1.114762138 |
| Tsfm          | 7.629    | 6.844    | 1.114699006 |
| Wdr1          | 45.6245  | 40.9345  | 1.114573282 |
| Ube2w         | 8.9195   | 8.003    | 1.114519555 |
| Fam49b        | 18.7405  | 16.8165  | 1.114411441 |
| Stk38l        | 6.957    | 6.2435   | 1.11427885  |
| Dnajc11       | 15.345   | 13.777   | 1.113812877 |
| 2610024G14Rik | 12.028   | 10.803   | 1.113394427 |
| Ubr1          | 9.2455   | 8.3075   | 1.112910021 |
| Wbp1          | 12.669   | 11.3855  | 1.112731105 |
| 8430410A17Rik | 7.2825   | 6.545    | 1.112681436 |
| Eno2          | 393.4545 | 353.6165 | 1.11265877  |
| 2010007H12Rik | 9.028    | 8.1155   | 1.11243916  |
| Gm11837       | 1.559    | 1.4015   | 1.112379593 |
| Exosc9        | 9.8795   | 8.883    | 1.11218057  |
| Cntn4         | 4.5075   | 4.053    | 1.112139156 |
| Cib1          | 3.277    | 2.947    | 1.111978283 |
| Trim27        | 8.5605   | 7.6985   | 1.111969864 |
| Exosc10       | 17.773   | 15.986   | 1.111785312 |
| 2310035K24Rik | 6.7335   | 6.057    | 1.111688955 |
| Pigy          | 3.2455   | 2.9195   | 1.111662956 |
| Rbm43         | 14.909   | 13.4165  | 1.111243618 |
| U2af1         | 43.267   | 38.94    | 1.111119671 |
| Rps6ka4       | 4.297    | 3.8675   | 1.111053652 |
| Zfp706        | 49.1015  | 44.1945  | 1.111031916 |
| Snrpa1        | 15.901   | 14.3145  | 1.110831674 |
| Rabgta        | 9.467    | 8.523    | 1.110759122 |
| Ccdc136       | 15.333   | 13.8045  | 1.110724764 |
| Tmem219       | 12.4485  | 11.208   | 1.110679872 |
| Med18         | 3.9685   | 3.5735   | 1.110535889 |
| Rbm16         | 15.2945  | 13.7735  | 1.110429448 |
| Lenep         | 3.619    | 3.26     | 1.110122699 |
| Prr12         | 14.9305  | 13.4515  | 1.109950563 |
| E130309D14Rik | 14.451   | 13.021   | 1.109822594 |
| Lonp2         | 31.3215  | 28.233   | 1.109393263 |
| Gyg           | 31.919   | 28.7825  | 1.108972466 |
| Pcna          | 28.172   | 25.4065  | 1.108850097 |
| Herpud2       | 12.369   | 11.156   | 1.108730728 |
| Eif5a         | 217.9875 | 196.722  | 1.108099247 |
| Cnksr2        | 22.675   | 20.4655  | 1.10796218  |
| Pacsin1       | 77.2445  | 69.724   | 1.107860995 |
| Cmas          | 196.9135 | 177.78   | 1.107624592 |
| Ypel4         | 33.781   | 30.4995  | 1.107591928 |
| Gm9846        | 315.552  | 284.9415 | 1.107427314 |

|               |          |          |             |
|---------------|----------|----------|-------------|
| Pold3         | 15.203   | 13.732   | 1.107122051 |
| Nrcam         | 24.195   | 21.856   | 1.107018668 |
| Pnkd          | 161.6365 | 146.023  | 1.106924936 |
| Lin37         | 46.991   | 42.456   | 1.106816469 |
| Ccl21a        | 1.632    | 1.4745   | 1.10681587  |
| Herpud1       | 16.331   | 14.756   | 1.106736243 |
| Spnb1         | 5.2185   | 4.716    | 1.106552163 |
| Wdr5          | 5.173    | 4.675    | 1.106524064 |
| LOC100504362  | 3.279    | 2.9635   | 1.106461954 |
| Naa25         | 6.3145   | 5.708    | 1.10625438  |
| Gm7120        | 8.7085   | 7.874    | 1.105981712 |
| Spats2l       | 10.497   | 9.493    | 1.105762141 |
| Psmc6         | 30.8335  | 27.8865  | 1.105678375 |
| Nfkbil2       | 1.259    | 1.139    | 1.105355575 |
| Wdr92         | 10.166   | 9.1975   | 1.105300353 |
| Sstr1         | 4.7655   | 4.312    | 1.105171614 |
| 1110021J02Rik | 16.5135  | 14.9425  | 1.105136356 |
| Sart1         | 6.451    | 5.8385   | 1.104907082 |
| Tgfb3         | 2.5345   | 2.294    | 1.10483871  |
| Mylip         | 2.9365   | 2.6585   | 1.104570246 |
| Denr          | 25.6645  | 23.236   | 1.104514546 |
| Klhdc8a       | 5.5645   | 5.038    | 1.104505756 |
| Rbm17         | 32.8735  | 29.7635  | 1.104490399 |
| Anapc5        | 44.388   | 40.1955  | 1.10430272  |
| Rhot1         | 17.119   | 15.5065  | 1.10398865  |
| 2310021P13Rik | 20.768   | 18.8165  | 1.103712168 |
| Cpne6         | 42.331   | 38.3625  | 1.103447377 |
| Abcf3         | 29.043   | 26.324   | 1.103289774 |
| Ilkap         | 21.1775  | 19.199   | 1.103052242 |
| Gm14535       | 4.45     | 4.0345   | 1.102986739 |
| 4933433P14Rik | 10.491   | 9.513    | 1.102806686 |
| Reep6         | 20.192   | 18.313   | 1.102604707 |
| Mark2         | 54.8095  | 49.7175  | 1.102418665 |
| Tmem184b      | 12.9125  | 11.716   | 1.102125299 |
| Tial1         | 19.2585  | 17.4755  | 1.102028554 |
| Ifngr2        | 28.763   | 26.102   | 1.101946211 |
| Crip2         | 22.4625  | 20.3935  | 1.101453895 |
| Racgap1       | 2.906    | 2.6385   | 1.101383362 |
| Dnajc16       | 4.1865   | 3.8015   | 1.101275812 |
| Hist2h2aa1    | 15.0945  | 13.7065  | 1.101265823 |
| Rnf5          | 120.9565 | 109.8365 | 1.101241391 |
| Tmx2          | 55.97    | 50.8325  | 1.101067231 |
| Ahdc1         | 8.663    | 7.8705   | 1.100692459 |
| Mrpl45        | 17.5145  | 15.916   | 1.100433526 |
| Acot8         | 5.357    | 4.8695   | 1.100112948 |
| Prkar1b       | 229.669  | 208.7705 | 1.100102744 |
| Clptm1        | 39.085   | 35.5285  | 1.100102734 |
| Commd6        | 94.128   | 85.567   | 1.100050253 |
| Gabarapl1     | 479.4975 | 436.1555 | 1.099372815 |
| Sgsh          | 2.147    | 1.953    | 1.099334357 |
| Pcdhgb1       | 4.234    | 3.8515   | 1.099311956 |
| Arfgap2       | 12.2145  | 11.112   | 1.099217063 |
| Pygo2         | 8.668    | 7.887    | 1.09902371  |
| Map2k3        | 2.0735   | 1.887    | 1.098834128 |
| Nudt18        | 4.8165   | 4.3845   | 1.098528909 |

|              |         |         |             |
|--------------|---------|---------|-------------|
| Cenpo        | 4.7245  | 4.301   | 1.098465473 |
| Fcho1        | 4.143   | 3.772   | 1.09835631  |
| Nefh         | 33.8945 | 30.8605 | 1.098313378 |
| B3gat1       | 36.9755 | 33.6735 | 1.098059305 |
| Nudt22       | 6.9955  | 6.371   | 1.098022288 |
| Mapk3        | 99.3115 | 90.4485 | 1.097989464 |
| Ppat         | 9.2945  | 8.466   | 1.097862036 |
| Lrrc8d       | 10.31   | 9.391   | 1.097859653 |
| Atp6v0a1     | 69.2265 | 63.064  | 1.097718191 |
| Cpsf3        | 19.92   | 18.148  | 1.097641613 |
| Brd4         | 92.4485 | 84.227  | 1.097611217 |
| Smarcd2      | 1.9475  | 1.7745  | 1.097492251 |
| Hist1h2al    | 3.283   | 2.993   | 1.09689275  |
| Ssbp4        | 22.0125 | 20.071  | 1.096731603 |
| H2afy        | 80.1695 | 73.105  | 1.096634977 |
| Ranbp3       | 13.511  | 12.3205 | 1.096627572 |
| Wdr91        | 7.237   | 6.5995  | 1.096598227 |
| Arfp2        | 21.2235 | 19.3615 | 1.096170235 |
| Dcaf13       | 11.2245 | 10.24   | 1.096142578 |
| Rnmt11       | 9.3505  | 8.5305  | 1.096125667 |
| Gpr173       | 5.084   | 4.6385  | 1.09604398  |
| Sars         | 71.0655 | 64.8425 | 1.095971007 |
| Nudt21       | 31.8395 | 29.058  | 1.095722348 |
| Cdc42bpb     | 29.583  | 27.001  | 1.095626088 |
| Ddx59        | 2.409   | 2.199   | 1.095497954 |
| Adssl1       | 10.3435 | 9.442   | 1.095477653 |
| Arhgef15     | 10.72   | 9.7875  | 1.095274585 |
| Larp1        | 54.888  | 50.1145 | 1.095251873 |
| Nub1         | 22.0765 | 20.1635 | 1.094874402 |
| Pfas         | 4.497   | 4.108   | 1.094693281 |
| Gm715        | 1.8395  | 1.6805  | 1.094614698 |
| Jakmip2      | 36.7785 | 33.612  | 1.094207426 |
| Spata7       | 12.48   | 11.406  | 1.094160968 |
| Nsun4        | 4.273   | 3.9055  | 1.094098067 |
| Lrch1        | 10.126  | 9.2575  | 1.093815825 |
| Sh3rf1       | 7.966   | 7.283   | 1.093780036 |
| Zbtb12       | 1.858   | 1.6995  | 1.093262724 |
| Fbxo11       | 26.5415 | 24.285  | 1.092917439 |
| Diras1       | 87.3545 | 79.9475 | 1.0926483   |
| Farsa        | 8.488   | 7.77    | 1.092406692 |
| Gdpd5        | 1.265   | 1.158   | 1.092400691 |
| Ccl21b       | 2.3     | 2.1055  | 1.092377108 |
| Stk25        | 76.549  | 70.0985 | 1.092020514 |
| Ppp2r2a      | 41.0585 | 37.6145 | 1.091560435 |
| Psmg2        | 10.0565 | 9.213   | 1.091555411 |
| Rap2b        | 22.7595 | 20.8535 | 1.091399525 |
| Smarcd1      | 35.0045 | 32.076  | 1.09129879  |
| Slc7a6os     | 6.672   | 6.114   | 1.091265947 |
| Ccl21c       | 2.205   | 2.021   | 1.091044038 |
| LOC100504346 | 2.1775  | 1.996   | 1.090931864 |
| LOC100504239 | 2.1775  | 1.996   | 1.090931864 |
| Elac2        | 4.61    | 4.226   | 1.090866067 |
| Arntl        | 4.388   | 4.0225  | 1.090863891 |
| Tmem158      | 14.6495 | 13.43   | 1.09080417  |
| Mrps24       | 19.934  | 18.2785 | 1.090570889 |

|               |          |           |             |
|---------------|----------|-----------|-------------|
| Fam92a        | 35.629   | 32.6705   | 1.0905557   |
| Sgta          | 38.9195  | 35.6895   | 1.090502809 |
| Caprin1       | 61.2775  | 56.194    | 1.090463395 |
| Dedd2         | 3.9305   | 3.6045    | 1.090442502 |
| Aldh3b2       | 9.2385   | 8.4735    | 1.090281466 |
| Ets2          | 24.1125  | 22.119    | 1.090126136 |
| Tuba1b        | 1199.305 | 1100.2465 | 1.090033006 |
| Wrnip1        | 13.3975  | 12.2915   | 1.089980881 |
| Gapdhs        | 1.3025   | 1.195     | 1.089958159 |
| Zfyve1        | 9.1205   | 8.369     | 1.089795675 |
| Dnaja3        | 28.828   | 26.453    | 1.089781877 |
| Gm505         | 1.3145   | 1.2065    | 1.089515126 |
| Olfm1         | 92.925   | 85.296    | 1.089441474 |
| Exosc2        | 14.5355  | 13.343    | 1.089372705 |
| Ankra2        | 8.719    | 8.0045    | 1.08926229  |
| Relt          | 2.1305   | 1.956     | 1.089212679 |
| Rnf25         | 7.037    | 6.462     | 1.088981739 |
| Pfkfb4        | 1.426    | 1.3095    | 1.088965254 |
| Nasp          | 5.1245   | 4.706     | 1.088929027 |
| Gns           | 26.785   | 24.6005   | 1.088799008 |
| Coil          | 11.238   | 10.323    | 1.088637024 |
| Mybbp1a       | 12.6725  | 11.641    | 1.088609226 |
| Tmem231       | 7.3265   | 6.731     | 1.088471252 |
| Cdr2          | 8.5185   | 7.8265    | 1.088417556 |
| Tbc1d10b      | 12.5075  | 11.4915   | 1.088413175 |
| Ddx24         | 67.162   | 61.733    | 1.087943239 |
| Hyls1         | 3.007    | 2.764     | 1.087916064 |
| Crif3         | 4.5175   | 4.1535    | 1.087636933 |
| Zfp259        | 10.616   | 9.761     | 1.087593484 |
| Gm4294        | 1.808    | 1.6625    | 1.087518797 |
| Slc9a6        | 17.9995  | 16.552    | 1.087451667 |
| Wars          | 36.087   | 33.1885   | 1.087334468 |
| Dnajb12       | 6.3105   | 5.804     | 1.087267402 |
| Mars          | 17.2675  | 15.883    | 1.087168671 |
| Sgcb          | 9.467    | 8.709     | 1.087036399 |
| Nrsn2         | 1157.804 | 1065.223  | 1.086912318 |
| Ppib          | 24.856   | 22.869    | 1.086886178 |
| Pcdhb13       | 1.4645   | 1.3475    | 1.086827458 |
| Slc7a3        | 7.624    | 7.0165    | 1.086581629 |
| Ccs           | 9.36     | 8.6185    | 1.086035853 |
| Hist1h4h      | 4.3885   | 4.0415    | 1.085859211 |
| B630019K06Rik | 22.806   | 21.005    | 1.08574149  |
| Mpped1        | 8.8095   | 8.1155    | 1.085515372 |
| Acly          | 37.621   | 34.6635   | 1.085320294 |
| Msl3l2        | 5.874    | 5.414     | 1.084964906 |
| Pgap2         | 2.5875   | 2.385     | 1.08490566  |
| Endod1        | 23.8445  | 21.987    | 1.084481739 |
| Shd           | 14.6385  | 13.4985   | 1.084453828 |
| Wdr11         | 9.3105   | 8.5875    | 1.08419214  |
| Btf3l4        | 24.806   | 22.8815   | 1.084107248 |
| LOC100503956  | 15.141   | 13.967    | 1.084055273 |
| 3110047P20Rik | 1.884    | 1.7385    | 1.083692839 |
| Smarcbl       | 30.4405  | 28.1005   | 1.08327254  |
| Aplp1         | 241.813  | 223.294   | 1.082935502 |
| Gtf2h2        | 13.2175  | 12.21     | 1.082514333 |

|            |          |          |             |
|------------|----------|----------|-------------|
| Gpr68      | 6.257    | 5.781    | 1.082338696 |
| Twf2       | 8.196    | 7.5735   | 1.082194494 |
| Supt6h     | 42.761   | 39.52    | 1.082009109 |
| Zkscan5    | 6.1435   | 5.678    | 1.081983093 |
| Ncor2      | 24.204   | 22.3735  | 1.081815541 |
| Mrp63      | 17.6875  | 16.35    | 1.081804281 |
| Paip2b     | 16.791   | 15.5235  | 1.081650401 |
| Tipr1      | 21.398   | 19.79    | 1.081253158 |
| Nrbp1      | 53.05    | 49.079   | 1.080910369 |
| Mapk11     | 5.674    | 5.2495   | 1.080864844 |
| 42067      | 20.2065  | 18.6965  | 1.080763779 |
| Rad23b     | 59.318   | 54.8875  | 1.080719654 |
| B3gat3     | 23.051   | 21.331   | 1.080633819 |
| Dnmbp      | 2.604    | 2.4115   | 1.079825835 |
| BC022687   | 2.1765   | 2.016    | 1.079613095 |
| Pprc1      | 6.1385   | 5.687    | 1.079391595 |
| Nr2f6      | 1.837    | 1.702    | 1.079318449 |
| Mcm4       | 2.799    | 2.5935   | 1.079236553 |
| Grm8       | 2.8275   | 2.6205   | 1.078992559 |
| Hmox2      | 37.6445  | 34.899   | 1.078669876 |
| Ccdc127    | 12.787   | 11.857   | 1.07843468  |
| G6pc3      | 57.2485  | 53.0865  | 1.078400347 |
| Atad1      | 26.5005  | 24.576   | 1.078308105 |
| Nckipsd    | 8.7955   | 8.1585   | 1.078078078 |
| Ahey       | 14.071   | 13.0525  | 1.078031029 |
| Rnf128     | 4.8355   | 4.486    | 1.07790905  |
| Calr       | 53.197   | 49.3585  | 1.07776776  |
| Clec21     | 2.8045   | 2.6025   | 1.077617675 |
| Asphd2     | 11.923   | 11.0645  | 1.077590492 |
| Limk1      | 14.3025  | 13.275   | 1.07740113  |
| Clstn1     | 60.393   | 56.0585  | 1.077321013 |
| Slitrk1    | 57.8525  | 53.709   | 1.077147219 |
| Nsun2      | 13.8605  | 12.8685  | 1.077087462 |
| Ttpal      | 7.517    | 6.9795   | 1.077011247 |
| Tpt1       | 292.4895 | 271.58   | 1.076992047 |
| Trpc4      | 6.587    | 6.117    | 1.07683505  |
| Abca5      | 4.6085   | 4.28     | 1.076752336 |
| Slit1      | 9.588    | 8.905    | 1.076698484 |
| Htra2      | 14.322   | 13.3025  | 1.076639729 |
| Ankrd32    | 2.428    | 2.256    | 1.076241135 |
| Ctu2       | 1.383    | 1.2855   | 1.075845974 |
| Gnai2      | 114.776  | 106.6865 | 1.075824964 |
| Ano7       | 1.151    | 1.07     | 1.075700935 |
| Mina       | 1.8925   | 1.7595   | 1.075589656 |
| Paf1       | 33.758   | 31.3985  | 1.075146902 |
| Scrn1      | 68.8585  | 64.049   | 1.075090946 |
| Kifap3     | 61.8235  | 57.506   | 1.075079122 |
| Sult4a1    | 145.6095 | 135.4425 | 1.075065065 |
| Trank1     | 14.2425  | 13.249   | 1.074986791 |
| Rpl12      | 227.767  | 211.9465 | 1.074643837 |
| Wdr55      | 10.627   | 9.8895   | 1.074574043 |
| Usp9x      | 34.0375  | 31.69    | 1.074076996 |
| Tmem131    | 26.1965  | 24.395   | 1.0738471   |
| Nerna00085 | 5.457    | 5.0825   | 1.073684211 |
| Sars2      | 4.2215   | 3.9325   | 1.073490146 |



|               |          |          |             |
|---------------|----------|----------|-------------|
| Ankrd34a      | 61.88    | 57.6465  | 1.073438977 |
| Lsm10         | 10.394   | 9.683    | 1.073427657 |
| Alas1         | 11.2615  | 10.492   | 1.073341594 |
| Morf411       | 235.6805 | 219.62   | 1.073128586 |
| AI413582      | 35.4355  | 33.027   | 1.072925182 |
| Fam18b        | 8.9985   | 8.3905   | 1.072462904 |
| Snrnp40       | 12.072   | 11.257   | 1.072399396 |
| Zcchc9        | 24.095   | 22.4695  | 1.072342509 |
| 2610301G19Rik | 10.683   | 9.9635   | 1.07221358  |
| Ubxn1         | 41.338   | 38.5555  | 1.072168692 |
| Stoml2        | 30.6115  | 28.554   | 1.072056454 |
| AI836003      | 27.599   | 25.7445  | 1.072034804 |
| Nif3l1        | 13.13    | 12.2485  | 1.071967996 |
| Tmem8b        | 11.8045  | 11.012   | 1.071966945 |
| Tor1aip2      | 19.055   | 17.777   | 1.071890645 |
| Atg16l2       | 2.297    | 2.1435   | 1.07161185  |
| Rhof          | 17.22    | 16.072   | 1.071428571 |
| 1700025K23Rik | 8.7495   | 8.167    | 1.071323619 |
| Ociad2        | 58.13    | 54.2625  | 1.0712739   |
| Gpr88         | 2.4575   | 2.294    | 1.071272886 |
| Cmpk1         | 65.7195  | 61.3585  | 1.071074097 |
| Cct3          | 28.1215  | 26.2635  | 1.070744569 |
| C77370        | 7.7685   | 7.258    | 1.070336181 |
| Agtrap        | 3.573    | 3.339    | 1.070080863 |
| Abcf2         | 37.246   | 34.8095  | 1.06999526  |
| Mkks          | 6.9195   | 6.4685   | 1.069722501 |
| Osbpl11       | 5.2745   | 4.931    | 1.069661326 |
| Cdh18         | 13.656   | 12.767   | 1.069632647 |
| Dgcr8         | 6.379    | 5.964    | 1.069584172 |
| Gm12952       | 1.3765   | 1.287    | 1.06954157  |
| Tmppe         | 6.934    | 6.4835   | 1.069484075 |
| Bzw1          | 30.047   | 28.095   | 1.069478555 |
| Asb8          | 71.7515  | 67.0995  | 1.069329876 |
| Nrxn2         | 26.082   | 24.391   | 1.069328851 |
| Nbr1          | 16.9955  | 15.8945  | 1.069269244 |
| Slc9a7        | 14.863   | 13.906   | 1.068819215 |
| Herc3         | 38.67    | 36.1915  | 1.068482931 |
| Chmp7         | 27.072   | 25.3465  | 1.06807646  |
| Sat2          | 8.205    | 7.683    | 1.06794221  |
| Tac1          | 35.105   | 32.8725  | 1.06791391  |
| Klhl7         | 25.584   | 23.959   | 1.0678242   |
| Mllt4         | 14.577   | 13.6515  | 1.067794748 |
| Vps24         | 28.8425  | 27.0225  | 1.067351281 |
| Htr1a         | 8.5005   | 7.9645   | 1.067298638 |
| LOC100504032  | 11.52    | 10.796   | 1.067061875 |
| Entpd6        | 10.1285  | 9.493    | 1.066944064 |
| Ascc1         | 11.087   | 10.3935  | 1.066724395 |
| Cntfr         | 42.464   | 39.826   | 1.066238136 |
| Rnd1          | 9.0505   | 8.489    | 1.066144422 |
| Arpp19        | 19.691   | 18.4715  | 1.066020626 |
| Ik            | 174.3825 | 163.5915 | 1.065963085 |
| Vasp          | 4.692    | 4.402    | 1.065879146 |
| Hmga2         | 3.554    | 3.335    | 1.065667166 |
| Ubc           | 307.8525 | 288.935  | 1.065473203 |
| Eif1ad        | 10.51    | 9.866    | 1.065274681 |

|               |          |         |             |
|---------------|----------|---------|-------------|
| Gm10260       | 16.23    | 15.238  | 1.065100407 |
| Bai3          | 11.597   | 10.89   | 1.064921947 |
| Mrpl44        | 14.077   | 13.2205 | 1.064785749 |
| Polr2g        | 80.121   | 75.273  | 1.064405564 |
| Arf1          | 444.618  | 417.91  | 1.063908497 |
| Atf3          | 1.0905   | 1.025   | 1.063902439 |
| Galt          | 14.1315  | 13.29   | 1.063318284 |
| Uqcrfs1       | 51.3055  | 48.2515 | 1.063293369 |
| Nfx1          | 13.229   | 12.4425 | 1.06321077  |
| Copa          | 43.4915  | 40.9135 | 1.063010987 |
| Kdm1a         | 20.8765  | 19.6415 | 1.062877072 |
| Eif2ak1       | 28.1195  | 26.4575 | 1.062817727 |
| Ppp3cb        | 52.9035  | 49.7835 | 1.062671367 |
| Phb2          | 40.645   | 38.252  | 1.06255882  |
| Dnajb11       | 12.772   | 12.0205 | 1.062518198 |
| Pcdhb7        | 1.337    | 1.2585  | 1.062375844 |
| Ttrap         | 11.4965  | 10.8215 | 1.062375826 |
| Parp2         | 17.7075  | 16.67   | 1.062237552 |
| Syt3          | 20.9755  | 19.7475 | 1.062185087 |
| Csnk1g2       | 35.881   | 33.783  | 1.062102241 |
| BC046404      | 4.1565   | 3.9135  | 1.062092756 |
| Pfkip         | 40.1875  | 37.847  | 1.061841097 |
| Dpp3          | 6.1945   | 5.8345  | 1.061701945 |
| Kcna3         | 5.765    | 5.431   | 1.061498803 |
| Srrm3         | 6.2145   | 5.855   | 1.061400512 |
| Eny2          | 24.3805  | 22.9705 | 1.061383078 |
| Lingo2        | 15.348   | 14.4615 | 1.061300695 |
| Fibin         | 1.534    | 1.4455  | 1.06122449  |
| Srgap2        | 9.752    | 9.1895  | 1.061211165 |
| Celsr2        | 21.0765  | 19.864  | 1.061040072 |
| 1110018G07Rik | 12.4435  | 11.7295 | 1.06087216  |
| Grm1          | 14.8415  | 13.9905 | 1.06082699  |
| Mrps30        | 8.4025   | 7.9215  | 1.060720823 |
| Tuba4a        | 195.1845 | 184.021 | 1.060664272 |
| Rnf40         | 6.882    | 6.489   | 1.060564031 |
| Cox10         | 16.137   | 15.216  | 1.060528391 |
| Htr7          | 5.5355   | 5.2215  | 1.060135976 |
| Coro2a        | 12.2965  | 11.6005 | 1.059997414 |
| Tmem229b      | 6.6545   | 6.2805  | 1.059549399 |
| Ctsb          | 86.76    | 81.8995 | 1.059347127 |
| Dgcr14        | 8.7385   | 8.25    | 1.059212121 |
| Wdr47         | 24.1105  | 22.7685 | 1.058941081 |
| 5730403B10Rik | 71.5105  | 67.5345 | 1.058873613 |
| Mapre3        | 179.825  | 169.852 | 1.058715823 |
| Clk3          | 22.527   | 21.279  | 1.058649373 |
| Kcnn1         | 1.3365   | 1.2625  | 1.058613861 |
| Slc9a8        | 7.3645   | 6.957   | 1.058574098 |
| B930041F14Rik | 33.601   | 31.75   | 1.058299213 |
| Arhgef11      | 25.3795  | 23.9845 | 1.058162563 |
| Elp3          | 22.7825  | 21.5305 | 1.058150066 |
| Gcn111        | 5.0435   | 4.7665  | 1.05811392  |
| Btbd11        | 11.09    | 10.482  | 1.058004198 |
| Gm10471       | 1.314    | 1.242   | 1.057971014 |
| Enkur         | 1.162    | 1.0985  | 1.057806099 |
| AW209491      | 12.9395  | 12.2335 | 1.057710385 |

|               |          |          |             |
|---------------|----------|----------|-------------|
| Slc35a4       | 14.4525  | 13.6665  | 1.057512897 |
| Wscd2         | 8.3565   | 7.9035   | 1.057316379 |
| Capza2        | 37.7265  | 35.682   | 1.057297797 |
| 4930422107Rik | 5.773    | 5.462    | 1.05693885  |
| Rtcd1         | 43.97    | 41.615   | 1.056590172 |
| Nf2           | 13.048   | 12.35    | 1.056518219 |
| 1700123O20Rik | 10.0835  | 9.5455   | 1.056361636 |
| Surf2         | 51.133   | 48.405   | 1.056357814 |
| Dtwd1         | 3.3655   | 3.1865   | 1.056174486 |
| Cby1          | 24.161   | 22.882   | 1.055895464 |
| Zer1          | 29.9835  | 28.3965  | 1.055887169 |
| Rabep2        | 1.761    | 1.668    | 1.055755396 |
| Shank3        | 11.676   | 11.0595  | 1.055743931 |
| Prmt6         | 1.451    | 1.3745   | 1.055656602 |
| Mapk8ip3      | 80.1975  | 75.975   | 1.055577493 |
| Tnfaip1       | 14.248   | 13.5     | 1.055407407 |
| Ube2e2        | 35.356   | 33.5035  | 1.055292731 |
| Gltscr2       | 50.024   | 47.405   | 1.055247337 |
| Spock1        | 72.745   | 68.9385  | 1.055215881 |
| Tssc1         | 8.7275   | 8.271    | 1.055192842 |
| Gyk           | 2.4775   | 2.3485   | 1.054928678 |
| Rassf4        | 3.4905   | 3.309    | 1.054850408 |
| Stx2          | 2.1575   | 2.0455   | 1.054754339 |
| Tmem215       | 2.264    | 2.1475   | 1.054249127 |
| Stmn4         | 97.0515  | 92.0695  | 1.054111296 |
| 1500003O03Rik | 49.4515  | 46.9205  | 1.053942307 |
| Lrrtm1        | 35.9195  | 34.0895  | 1.053682219 |
| Rps9          | 289.9795 | 275.228  | 1.053597381 |
| C2cd2l        | 15.007   | 14.2465  | 1.053381532 |
| Fam189a2      | 1.501    | 1.425    | 1.053333333 |
| Gart          | 7.878    | 7.48     | 1.053208556 |
| Dnm1          | 172.7045 | 163.99   | 1.053140435 |
| 4932438A13Rik | 5.6385   | 5.356    | 1.052744586 |
| Ankrd55       | 21.814   | 20.724   | 1.052596024 |
| Cacnb1        | 24.6895  | 23.466   | 1.052139265 |
| Igfbp7        | 2.2885   | 2.1755   | 1.051942082 |
| Pcca          | 10.586   | 10.0645  | 1.051815788 |
| Atg7          | 11.289   | 10.7335  | 1.051753855 |
| Zfp105        | 4.953    | 4.7095   | 1.051704003 |
| Ppp2r1a       | 149.3985 | 142.0545 | 1.051698468 |
| Kcnab2        | 28.063   | 26.685   | 1.051639498 |
| Zzef1         | 3.238    | 3.0795   | 1.051469394 |
| Adamts9       | 1.319    | 1.2545   | 1.051414906 |
| Atg2b         | 10.4465  | 9.936    | 1.051378824 |
| Tesk1         | 31.9     | 30.3535  | 1.050949643 |
| Slc35f3       | 19.68    | 18.73    | 1.050720769 |
| Slc11a2       | 14.032   | 13.3555  | 1.050653289 |
| Fchsd1        | 2.8745   | 2.736    | 1.050621345 |
| Zfp865        | 11.6695  | 11.1085  | 1.050501868 |
| Mrpl49        | 28.2445  | 26.8935  | 1.050235187 |
| Srxn1         | 43.9445  | 41.856   | 1.049897267 |
| Sema3a        | 3.9325   | 3.746    | 1.049786439 |
| Ppp2r2d       | 13.631   | 12.985   | 1.049749711 |
| Nap115        | 949.0995 | 904.2195 | 1.049633966 |
| Whamm         | 3.661    | 3.488    | 1.049598624 |

|               |          |          |             |
|---------------|----------|----------|-------------|
| Rab3il1       | 1.855    | 1.7675   | 1.049504951 |
| Myst2         | 32.8045  | 31.2575  | 1.049492122 |
| Gramd1a       | 10.1825  | 9.704    | 1.049309563 |
| Agap3         | 38.606   | 36.814   | 1.048677134 |
| Atp6v1d       | 197.141  | 188.0325 | 1.048441094 |
| Xpo6          | 38.923   | 37.132   | 1.04823333  |
| 8430419L09Rik | 30.6215  | 29.218   | 1.048035458 |
| Atxn7l1       | 81.124   | 77.408   | 1.048005374 |
| Gtf3c3        | 9.0925   | 8.677    | 1.047885214 |
| Kcnk3         | 6.237    | 5.9555   | 1.047267232 |
| Srsf15        | 17.5355  | 16.754   | 1.046645577 |
| Pank1         | 11.6785  | 11.16    | 1.046460573 |
| Rps12         | 145.405  | 138.9515 | 1.046444263 |
| Gabra5        | 36.7365  | 35.1085  | 1.046370537 |
| Syvn1         | 18.312   | 17.5025  | 1.046250536 |
| Daam1         | 37.027   | 35.3915  | 1.046211661 |
| Klhl17        | 2.738    | 2.618    | 1.045836516 |
| Gm3258        | 1.497    | 1.4315   | 1.0457562   |
| Pcdh18        | 5.288    | 5.0575   | 1.045575877 |
| Polr1a        | 8.072    | 7.721    | 1.045460433 |
| Car11         | 15.7175  | 15.0355  | 1.045359316 |
| Alkbh7        | 21.6045  | 20.6685  | 1.045286305 |
| Rabepk        | 5.2305   | 5.005    | 1.045054945 |
| Rhbdd2        | 25.312   | 24.233   | 1.04452606  |
| Rab10         | 45.9655  | 44.0125  | 1.044373757 |
| Mcm2          | 1.377    | 1.3185   | 1.044368601 |
| Gm5745        | 1.2855   | 1.231    | 1.044272949 |
| Ly6e          | 109.5595 | 104.928  | 1.044139791 |
| Rhbdl1        | 6.1185   | 5.861    | 1.043934482 |
| Snx7          | 7.667    | 7.3445   | 1.043910409 |
| Clcn4-2       | 8.902    | 8.529    | 1.043733146 |
| Mrps31        | 34.773   | 33.317   | 1.043701414 |
| Hrh3          | 17.9395  | 17.1905  | 1.043570577 |
| Bex1          | 205.4675 | 196.902  | 1.043501336 |
| Fam73b        | 7.255    | 6.9535   | 1.043359459 |
| Dnajb5        | 16.57    | 15.8835  | 1.043220953 |
| Fscn1         | 39.888   | 38.2355  | 1.043218998 |
| Fam65b        | 19.2925  | 18.4965  | 1.043035169 |
| Galnt1        | 14.534   | 13.9345  | 1.043022713 |
| Dlgap3        | 5.323    | 5.1045   | 1.042805368 |
| Eftud1        | 3.9075   | 3.748    | 1.04255603  |
| Ciao1         | 17.2375  | 16.5345  | 1.042517161 |
| Gm6813        | 6.712    | 6.4385   | 1.042478838 |
| Lemd3         | 3.547    | 3.4025   | 1.042468773 |
| Ddx1          | 42.4365  | 40.7125  | 1.042345717 |
| Pgap1         | 6.9265   | 6.6455   | 1.042284253 |
| Hdac10        | 1.2085   | 1.1595   | 1.042259595 |
| Vps41         | 35.238   | 33.8355  | 1.041450548 |
| Rnf185        | 14.268   | 13.7005  | 1.041421846 |
| Rpl18a        | 398.8015 | 383.003  | 1.041249024 |
| Rragd         | 25.346   | 24.348   | 1.040988993 |
| Asah1         | 8.0035   | 7.69     | 1.04076723  |
| Acaal1a       | 8.7155   | 8.3745   | 1.040718849 |
| Intu          | 4.835    | 4.646    | 1.040680155 |
| Vti1b         | 87.386   | 83.9865  | 1.040476743 |

|               |          |          |             |
|---------------|----------|----------|-------------|
| Ankrd50       | 8.3585   | 8.0335   | 1.040455592 |
| B230217C12Rik | 126.719  | 121.798  | 1.040402962 |
| Snap47        | 188.019  | 180.73   | 1.04033088  |
| Acadm         | 8.0965   | 7.788    | 1.039612224 |
| Zfp408        | 8.014    | 7.7095   | 1.039496725 |
| 4930455C21Rik | 25.2075  | 24.25    | 1.039484536 |
| Fstl5         | 9.8425   | 9.469    | 1.039444503 |
| Rfng          | 14.6515  | 14.1     | 1.039113475 |
| Tmem67        | 2.849    | 2.742    | 1.039022611 |
| Fam78b        | 23.518   | 22.635   | 1.039010382 |
| Dclk2         | 15.1095  | 14.543   | 1.038953448 |
| Tmem38a       | 20.841   | 20.06    | 1.0389332   |
| Slc17a8       | 2.0025   | 1.9275   | 1.038910506 |
| 2310011J03Rik | 3.9045   | 3.759    | 1.038707103 |
| Dgke          | 9.4      | 9.0505   | 1.038616651 |
| Bcap31        | 27.0605  | 26.058   | 1.03847187  |
| Rufy1         | 8.785    | 8.461    | 1.038293346 |
| Lipa          | 11.5965  | 11.1695  | 1.038229106 |
| Trim32        | 65.522   | 63.116   | 1.038120286 |
| Rnf167        | 16.1125  | 15.5215  | 1.038076217 |
| Crhr1         | 1.19     | 1.1465   | 1.037941561 |
| Las1l         | 15.8635  | 15.284   | 1.037915467 |
| Sec13         | 25.8905  | 24.957   | 1.037404335 |
| Inpp5a        | 12.716   | 12.258   | 1.037363355 |
| Abt1          | 7.387    | 7.123    | 1.037063035 |
| Amigo1        | 16.3555  | 15.772   | 1.036995942 |
| Cpsf6         | 10.781   | 10.3975  | 1.036883866 |
| Armex5        | 14.9025  | 14.373   | 1.036839908 |
| Trmt61a       | 22.058   | 21.29    | 1.036073274 |
| Ythdc1        | 16.928   | 16.3445  | 1.035700083 |
| Tmem104       | 6.549    | 6.3255   | 1.035333175 |
| Prpf3         | 10.1895  | 9.8425   | 1.035255271 |
| Klhdc2        | 95.295   | 92.06    | 1.035140126 |
| Mipep         | 9.708    | 9.3795   | 1.035023189 |
| Gdi2          | 57.569   | 55.6225  | 1.034994831 |
| Zfp503        | 2.293    | 2.216    | 1.034747292 |
| Cinp          | 11.6     | 11.2105  | 1.034744213 |
| Gatad1        | 28.8575  | 27.895   | 1.034504391 |
| Itgb1         | 7.2315   | 6.9905   | 1.034475359 |
| Usp51         | 2.416    | 2.3355   | 1.034467994 |
| Gfra4         | 9.2295   | 8.922    | 1.034465367 |
| Trappc3       | 104.0575 | 100.6335 | 1.034024455 |
| Ola1          | 46.9025  | 45.3605  | 1.033994334 |
| Sc4mol        | 13.2595  | 12.826   | 1.033798534 |
| Setmar        | 1.945    | 1.8815   | 1.033749668 |
| Vipar         | 15.2915  | 14.7935  | 1.033663433 |
| Pacs1         | 49.788   | 48.179   | 1.033396293 |
| Pkm2          | 277.133  | 268.2155 | 1.033247519 |
| Far2          | 6.9095   | 6.6875   | 1.033196262 |
| Fstl1         | 7.1075   | 6.8795   | 1.033141943 |
| Dlg4          | 117.979  | 114.1985 | 1.033104638 |
| Zechc12       | 107.6645 | 104.215  | 1.033099842 |
| Rpl37         | 258.589  | 250.329  | 1.032996577 |
| Fam82a2       | 8.5835   | 8.3095   | 1.032974307 |
| Stt3a         | 7.791    | 7.543    | 1.032878165 |

|               |          |          |             |
|---------------|----------|----------|-------------|
| Map2k4        | 91.939   | 89.0155  | 1.032842595 |
| Fbxo17        | 6.154    | 5.9585   | 1.032810271 |
| Ypel1         | 1.4555   | 1.4095   | 1.032635686 |
| Ckap4         | 12.9055  | 12.5     | 1.03244     |
| Sncg          | 28.2645  | 27.3815  | 1.032248051 |
| Usp22         | 78.7325  | 76.289   | 1.032029519 |
| AU040320      | 6.355    | 6.1585   | 1.03190712  |
| Tmem143       | 5.695    | 5.5195   | 1.031796358 |
| 2210016F16Rik | 7.897    | 7.655    | 1.031613325 |
| Snap91        | 100.8055 | 97.7245  | 1.031527406 |
| Astn2         | 5.8625   | 5.6835   | 1.031494678 |
| Clvs2         | 14.917   | 14.462   | 1.031461762 |
| Aldoa         | 615.1715 | 596.421  | 1.031438363 |
| Dusp7         | 16.729   | 16.2195  | 1.031412806 |
| 4732456N10Rik | 1.5285   | 1.482    | 1.031376518 |
| LOC100502792  | 2.057    | 1.9945   | 1.031336174 |
| Gpr56         | 20.0805  | 19.4825  | 1.030694213 |
| Bola3         | 14.89    | 14.448   | 1.03059247  |
| Dgat1         | 3.875    | 3.76     | 1.030585106 |
| Clk4          | 17.0715  | 16.568   | 1.030389908 |
| Nkiras2       | 1.0695   | 1.038    | 1.030346821 |
| Ptpro         | 7.3835   | 7.1665   | 1.030279774 |
| Gpx3          | 119.1885 | 115.722  | 1.02995541  |
| Tmem129       | 4.6315   | 4.4975   | 1.02979433  |
| Mdga2         | 19.503   | 18.941   | 1.029671084 |
| Nat10         | 3.9985   | 3.8835   | 1.029612463 |
| Gm9104        | 8.003    | 7.773    | 1.029589605 |
| Actl6b        | 13.5715  | 13.1815  | 1.029586921 |
| Mybl1         | 3.293    | 3.1985   | 1.029545099 |
| Gm15427       | 163.4345 | 158.764  | 1.029417878 |
| Chid1         | 5.0265   | 4.883    | 1.029387672 |
| Prpsap2       | 18.322   | 17.801   | 1.029268019 |
| Sf1           | 34.29    | 33.316   | 1.029235202 |
| Siah2         | 4.4365   | 4.3105   | 1.029230948 |
| Wdr5b         | 1.839    | 1.787    | 1.029099049 |
| Sar1a         | 78.6105  | 76.3895  | 1.029074676 |
| Hnmt          | 4.838    | 4.7015   | 1.029033287 |
| Ncs1          | 61.376   | 59.648   | 1.028969957 |
| Casp9         | 5.5385   | 5.3835   | 1.028791678 |
| Arl2bp        | 52.248   | 50.786   | 1.028787461 |
| Tomm5         | 59.6755  | 58.0235  | 1.028471223 |
| Sympk         | 14.302   | 13.9075  | 1.02836599  |
| Angel2        | 11.5055  | 11.1905  | 1.028148876 |
| Slc30a1       | 6.0755   | 5.9115   | 1.027742536 |
| Slc9a1        | 18.99    | 18.478   | 1.027708626 |
| Tmem50a       | 54.287   | 52.826   | 1.027656836 |
| Slc7a8        | 8.1795   | 7.9595   | 1.027639927 |
| Efha2         | 74.185   | 72.1995  | 1.02750019  |
| Fundc1        | 25.222   | 24.5475  | 1.02747734  |
| Chchd3        | 20.029   | 19.4935  | 1.027470695 |
| Hspd1         | 116.182  | 113.0825 | 1.027409192 |
| Mmp15         | 2.074    | 2.0195   | 1.026986878 |
| Mageh1        | 10.543   | 10.269   | 1.026682248 |
| Zfp383        | 3.2665   | 3.183    | 1.026233113 |
| Optc          | 5.489    | 5.349    | 1.026173116 |

|               |          |          |             |
|---------------|----------|----------|-------------|
| Ulk3          | 5.3245   | 5.1905   | 1.025816395 |
| Prkaca        | 291.643  | 284.3385 | 1.025689451 |
| Bst2          | 5.0835   | 4.957    | 1.025519467 |
| Ilk           | 44.04    | 42.958   | 1.025187392 |
| Hes6          | 3.723    | 3.632    | 1.025055066 |
| Med22         | 3.55     | 3.4635   | 1.024974737 |
| Fam169a       | 14.196   | 13.8525  | 1.024796968 |
| Prune         | 9.7295   | 9.499    | 1.024265712 |
| Shisa5        | 50.1675  | 48.981   | 1.024223679 |
| Hdgf          | 54.254   | 52.977   | 1.0241048   |
| Acvr1         | 5.381    | 5.2555   | 1.023879745 |
| Arfgap1       | 17.8225  | 17.4095  | 1.02372268  |
| Dlg3          | 18.7355  | 18.302   | 1.023685936 |
| 2310008H09Rik | 9.492    | 9.2735   | 1.023561762 |
| Tmem127       | 23.9295  | 23.3805  | 1.023481106 |
| Rab3ip        | 15.321   | 14.97    | 1.023446894 |
| Peo1          | 1.916    | 1.8725   | 1.023230975 |
| Nsmaf         | 5.4875   | 5.3635   | 1.023119232 |
| Pcdhga10      | 3.2285   | 3.156    | 1.022972117 |
| Usp15         | 11.328   | 11.0765  | 1.022705728 |
| Grk6          | 5.361    | 5.242    | 1.022701259 |
| Cdbl          | 18.46    | 18.051   | 1.022658024 |
| C530028O21Rik | 132.1185 | 129.193  | 1.022644416 |
| Inadl         | 6.843    | 6.6915   | 1.022640664 |
| Comt1         | 29.776   | 29.1185  | 1.022580147 |
| Cdk5r1        | 33.8735  | 33.133   | 1.022349319 |
| Cdk8          | 14.511   | 14.194   | 1.02233338  |
| Tmem49        | 15.5205  | 15.1815  | 1.022329809 |
| Gm9855        | 3.494    | 3.4185   | 1.02208571  |
| AU022870      | 7.444    | 7.2835   | 1.022036109 |
| 2900055J20Rik | 12.096   | 11.8355  | 1.022010055 |
| Serp2         | 120.578  | 117.9985 | 1.021860447 |
| 1110059E24Rik | 20.1735  | 19.7465  | 1.021624085 |
| Slc4a10       | 13.297   | 13.016   | 1.021588814 |
| Ttc28         | 4.013    | 3.9285   | 1.021509482 |
| Fgf13         | 25.768   | 25.2365  | 1.021060765 |
| Oscp1         | 13.623   | 13.3425  | 1.021023047 |
| Actn4         | 12.008   | 11.761   | 1.021001616 |
| LOC100504516  | 1.4315   | 1.4025   | 1.020677362 |
| Scg2          | 168.033  | 164.6335 | 1.020648896 |
| Rrn3          | 28.6885  | 28.111   | 1.020543559 |
| Phf8          | 9.8735   | 9.675    | 1.020516796 |
| Ino80e        | 27.768   | 27.2165  | 1.020263443 |
| Lynx1         | 149.4885 | 146.5235 | 1.020235662 |
| Gstcd         | 1.4985   | 1.469    | 1.020081688 |
| Tmem178       | 8.2      | 8.039    | 1.020027367 |
| Gmcl1         | 7.027    | 6.8895   | 1.019957907 |
| Hscb          | 23.443   | 23.011   | 1.01877363  |
| Riok1         | 6.078    | 5.966    | 1.018773047 |
| Wdr75         | 12.4215  | 12.1935  | 1.018698487 |
| Tmem184c      | 16.4865  | 16.185   | 1.01862836  |
| Zcchc16       | 4.299    | 4.2205   | 1.018599692 |
| Commd10       | 6.84     | 6.7155   | 1.0185392   |
| Zmat5         | 16.722   | 16.4215  | 1.018299181 |
| Sdhaf2        | 8.474    | 8.3235   | 1.018081336 |

|               |          |          |             |
|---------------|----------|----------|-------------|
| Slc8a3        | 25.7125  | 25.265   | 1.01771225  |
| Pot1b         | 21.1755  | 20.8095  | 1.017588121 |
| Pim2          | 19.756   | 19.417   | 1.017458928 |
| Nagk          | 17.099   | 16.8085  | 1.017282922 |
| Lman2l        | 6.441    | 6.332    | 1.01721415  |
| Kcna4         | 4.1615   | 4.0915   | 1.01710864  |
| Pafah1b1      | 86.918   | 85.47    | 1.016941617 |
| St3gal3       | 5.6555   | 5.5625   | 1.016719101 |
| Lmo4          | 26.7215  | 26.2825  | 1.016703129 |
| Tmem165       | 5.8575   | 5.7615   | 1.016662328 |
| Sbds          | 54.3455  | 53.457   | 1.016620835 |
| Nmral1        | 17.9765  | 17.6835  | 1.016569118 |
| Hist2h3c2-ps  | 1.422    | 1.399    | 1.016440315 |
| 2900073G15Rik | 6.8835   | 6.773    | 1.016314779 |
| Zbtb22        | 5.2685   | 5.187    | 1.015712358 |
| Capn10        | 5.755    | 5.666    | 1.01570773  |
| 9130011J15Rik | 28.9795  | 28.5335  | 1.01563075  |
| Limd2         | 6.175    | 6.08     | 1.015625    |
| Dnmt1         | 14.565   | 14.3475  | 1.015159435 |
| Bat2l2        | 96.824   | 95.399   | 1.014937263 |
| Rbm8a         | 22.2675  | 21.941   | 1.014880817 |
| Mmab          | 15.339   | 15.1175  | 1.014651894 |
| Gpr165        | 36.6565  | 36.1295  | 1.014586418 |
| Ryr2          | 7.442    | 7.3355   | 1.014518438 |
| Fam49a        | 15.745   | 15.526   | 1.014105372 |
| Exosc1        | 13.324   | 13.1415  | 1.013887304 |
| Mtap1s        | 8.6135   | 8.497    | 1.013710721 |
| Lrrc4         | 11.2655  | 11.115   | 1.013540261 |
| Herc1         | 13.927   | 13.742   | 1.013462378 |
| Vps4b         | 10.0165  | 9.8865   | 1.013149244 |
| Upf3a         | 12.3205  | 12.163   | 1.012949108 |
| Nhlrc3        | 1.6505   | 1.6295   | 1.012887389 |
| Clk2          | 11.3505  | 11.207   | 1.012804497 |
| Efna3         | 4.5545   | 4.497    | 1.012786302 |
| Gm10335       | 1.404    | 1.3865   | 1.012621709 |
| Gdap2         | 7.234    | 7.144    | 1.012597984 |
| Eml2          | 20.0925  | 19.8435  | 1.01254819  |
| Gm8841        | 1.7845   | 1.7625   | 1.01248227  |
| Pcbp4         | 15.0925  | 14.9075  | 1.012409861 |
| Dynlt1b       | 7.5975   | 7.505    | 1.012325117 |
| Ankrd49       | 4.9795   | 4.9205   | 1.011990651 |
| Hunk          | 5.4155   | 5.3515   | 1.011959264 |
| Eif4h         | 103.4355 | 102.2235 | 1.011856374 |
| 4933407C03Rik | 396.6265 | 391.995  | 1.011815202 |
| Parn          | 9.0015   | 8.8965   | 1.011802394 |
| Ercc1         | 7.619    | 7.531    | 1.011685035 |
| Evi5l         | 18.8135  | 18.599   | 1.011532878 |
| B4galt5       | 18.1305  | 17.925   | 1.011464435 |
| Rpl23a        | 485.6065 | 480.2    | 1.01125885  |
| Nsg2          | 221.226  | 218.787  | 1.011147829 |
| Rsph3a        | 15.292   | 15.126   | 1.010974481 |
| Mzt2          | 16.099   | 15.929   | 1.010672359 |
| Hip1r         | 3.857    | 3.8165   | 1.010611817 |
| Ube2l3        | 138.401  | 136.9755 | 1.010406971 |
| Coasy         | 8.6775   | 8.5905   | 1.010127466 |



|               |          |          |             |
|---------------|----------|----------|-------------|
| Deblid2       | 3.946    | 3.9065   | 1.010111353 |
| Ubr5          | 15.707   | 15.5505  | 1.010063985 |
| Mcm3ap        | 5.9095   | 5.852    | 1.009825701 |
| Tppp3         | 125.1855 | 123.9705 | 1.009800719 |
| Lin9          | 2.8705   | 2.843    | 1.009672881 |
| Setdb1        | 4.915    | 4.868    | 1.009654889 |
| Oat           | 23.1135  | 22.8965  | 1.009477431 |
| Nckap1        | 52.8025  | 52.3105  | 1.009405378 |
| Tbc1d9        | 16.8555  | 16.7     | 1.009311377 |
| Elovl4        | 13.063   | 12.943   | 1.009271421 |
| Dhx15         | 26.7985  | 26.5545  | 1.00918865  |
| Anp32a        | 67.6175  | 67.0225  | 1.008877616 |
| Anapc1        | 5.5565   | 5.508    | 1.008805374 |
| Rbm19         | 1.857    | 1.841    | 1.008690929 |
| Psmb5         | 103.025  | 102.141  | 1.008654703 |
| Slc25a20      | 6.2      | 6.15     | 1.008130081 |
| Zfp1          | 12.655   | 12.5535  | 1.008085395 |
| H3f3a         | 161.7235 | 160.4285 | 1.008072132 |
| Oaz1          | 473.012  | 469.2325 | 1.008054642 |
| Rasd2         | 15.048   | 14.93    | 1.00790355  |
| Gm10071       | 2.939    | 2.916    | 1.007887517 |
| Ube2q1        | 54.4725  | 54.0465  | 1.007882102 |
| Acp2          | 16.7055  | 16.5775  | 1.007721309 |
| C330018D20Rik | 4.029    | 3.9985   | 1.00762786  |
| Cpe           | 133.7825 | 132.775  | 1.007588025 |
| Kctd15        | 2.916    | 2.8945   | 1.00742788  |
| Tmem126a      | 49.5925  | 49.2285  | 1.007394091 |
| Osbpl1a       | 22.023   | 21.8665  | 1.007157067 |
| Rab11a        | 23.493   | 23.3275  | 1.007094631 |
| Pde9a         | 5.973    | 5.931    | 1.007081437 |
| Zfyve19       | 7.734    | 7.681    | 1.006900143 |
| Klhl23        | 4.959    | 4.9255   | 1.00680134  |
| Ccdc25        | 28.995   | 28.801   | 1.006735877 |
| Fbrs          | 23.3575  | 23.2025  | 1.006680315 |
| 5830418K08Rik | 2.869    | 2.85     | 1.006666667 |
| Gm10036       | 7.8995   | 7.8475   | 1.006626314 |
| Pomt1         | 2.7815   | 2.7635   | 1.006513479 |
| Ina           | 114.1345 | 113.4255 | 1.006250799 |
| Bai2          | 8.871    | 8.8165   | 1.006181591 |
| Stx7          | 35.2505  | 35.041   | 1.005978711 |
| Snd1          | 15.1     | 15.011   | 1.005928985 |
| Ap1g1         | 32.5895  | 32.4035  | 1.005740121 |
| Gars          | 40.4015  | 40.171   | 1.00573797  |
| Znhit3        | 33.768   | 33.5765  | 1.005703394 |
| Aspdh         | 1.3845   | 1.377    | 1.005446623 |
| Pycr2         | 6.472    | 6.437    | 1.005437316 |
| Spred2        | 45.1715  | 44.9305  | 1.00536384  |
| Scp2          | 17.114   | 17.024   | 1.005286654 |
| Tagap1        | 23.2015  | 23.0815  | 1.005198969 |
| Atf4          | 72.5415  | 72.1755  | 1.005070973 |
| Copb2         | 36.203   | 36.0225  | 1.005010757 |
| Syn2          | 98.1505  | 97.6735  | 1.004883617 |
| Supv3l1       | 7.3165   | 7.2825   | 1.004668726 |
| Cirh1a        | 19.3025  | 19.218   | 1.00439692  |
| Pdzk1         | 2.199    | 2.1895   | 1.00433889  |

|               |           |          |             |
|---------------|-----------|----------|-------------|
| Vmn1r65       | 5.3485    | 5.326    | 1.004224559 |
| Atg9b         | 6.0815    | 6.056    | 1.0042107   |
| Polb          | 16.193    | 16.1305  | 1.003874647 |
| 1190002N15Rik | 8.8925    | 8.86     | 1.003668172 |
| App           | 240.628   | 239.8235 | 1.00335455  |
| Rps3          | 129.5075  | 129.078  | 1.003327445 |
| Dact3         | 15.706    | 15.655   | 1.003257745 |
| Elof1         | 26.0745   | 25.99    | 1.00325125  |
| Psm12         | 102.3345  | 102.0115 | 1.00316631  |
| Galnt11       | 5.0435    | 5.029    | 1.002883277 |
| Dpfl          | 7.8465    | 7.824    | 1.002875767 |
| Tspyl1        | 83.387    | 83.162   | 1.002705563 |
| Tapbp         | 10.881    | 10.8525  | 1.002626123 |
| Ndufa10       | 141.926   | 141.597  | 1.002323496 |
| Vopp1         | 13.327    | 13.3015  | 1.001917077 |
| Rdh13         | 8.1975    | 8.182    | 1.001894402 |
| Oprm1         | 16.294    | 16.265   | 1.00178297  |
| Becn1         | 20.429    | 20.3955  | 1.001642519 |
| Kcnc3         | 14.221    | 14.2015  | 1.001373094 |
| Lsm6          | 18.2405   | 18.2155  | 1.001372458 |
| Jph3          | 17.171    | 17.148   | 1.001341264 |
| Cdk14         | 33.281    | 33.238   | 1.0012937   |
| Thra          | 103.057   | 102.9295 | 1.001238712 |
| Cnrip1        | 68.567    | 68.492   | 1.001095018 |
| 1700016K19Rik | 2.302     | 2.2995   | 1.001087193 |
| Myo1h         | 13.461    | 13.447   | 1.001041124 |
| Irs4          | 42.276    | 42.2325  | 1.001030012 |
| Vps35         | 33.6535   | 33.62    | 1.000996431 |
| Det1          | 1.278     | 1.277    | 1.000783085 |
| Igf2r         | 3.144     | 3.142    | 1.000636537 |
| Mrpl1         | 7.295     | 7.291    | 1.000548622 |
| Baz1b         | 20.765    | 20.7595  | 1.000264939 |
| Ppp1cc        | 53.892    | 53.882   | 1.000185591 |
| 4933421E11Rik | 13.171    | 13.1745  | 0.999734335 |
| Pnck          | 81.3105   | 81.3395  | 0.99964347  |
| Mboat7        | 37.241    | 37.2595  | 0.999503482 |
| Lphn1         | 60.42     | 60.451   | 0.999487188 |
| 1500010J02Rik | 5.9755    | 5.9795   | 0.999331048 |
| Sdha          | 169.295   | 169.409  | 0.999327072 |
| Cdk5          | 34.082    | 34.108   | 0.999237715 |
| Ahi1          | 280.1875  | 280.421  | 0.999167323 |
| Psm17         | 76.0455   | 76.1255  | 0.998949104 |
| Trnp1         | 21.8535   | 21.8775  | 0.998902983 |
| Gapdh         | 5236.8085 | 5242.685 | 0.998879105 |
| Rasal1        | 2.9075    | 2.911    | 0.998797664 |
| Zc3h10        | 5.07      | 5.0765   | 0.99871959  |
| Tacr1         | 5.2085    | 5.2155   | 0.998657847 |
| Calm3         | 415.6395  | 416.226  | 0.99859091  |
| Slc25a16      | 16.2975   | 16.321   | 0.998560137 |
| Tulp3         | 6.0205    | 6.03     | 0.998424544 |
| Otof          | 2.12      | 2.1235   | 0.998351778 |
| Rtn4ip1       | 7.8005    | 7.8135   | 0.998336213 |
| Auh           | 44.3655   | 44.442   | 0.998278655 |
| Fxr2          | 13.289    | 13.3125  | 0.998234742 |
| Stoml1        | 5.324     | 5.334    | 0.998125234 |

|               |         |         |             |
|---------------|---------|---------|-------------|
| Lrrfip2       | 10.0995 | 10.121  | 0.997875704 |
| Chn2          | 35.169  | 35.2455 | 0.99782951  |
| Rap1b         | 9.4635  | 9.485   | 0.997733263 |
| Laptm4a       | 18.157  | 18.1985 | 0.997719592 |
| Stxbp6        | 20.8675 | 20.9175 | 0.997609657 |
| B230208H17Rik | 36.18   | 36.267  | 0.997601125 |
| Plxna1        | 14.083  | 14.117  | 0.997591556 |
| Gpr19         | 15.859  | 15.899  | 0.997484118 |
| Scoc          | 149.156 | 149.543 | 0.997412116 |
| Cnot1         | 30.927  | 31.01   | 0.997323444 |
| Ythdc2        | 4.456   | 4.469   | 0.997091072 |
| Tmed10        | 27.5315 | 27.6175 | 0.996886032 |
| Commd8        | 12.3605 | 12.401  | 0.996734134 |
| Tmem167b      | 26.709  | 26.7985 | 0.996660261 |
| Gas2l1        | 10.4265 | 10.4615 | 0.996654399 |
| Adam23        | 26.1315 | 26.229  | 0.99628274  |
| 5730455O13Rik | 11.441  | 11.4845 | 0.996212286 |
| Nacc1         | 40.466  | 40.6215 | 0.996171978 |
| Trappc9       | 33.894  | 34.0275 | 0.996076703 |
| Mtif2         | 11.4115 | 11.4595 | 0.995811336 |
| Zfp39         | 9.081   | 9.12    | 0.995723684 |
| Lrp12         | 5.8935  | 5.9195  | 0.995607737 |
| Bin1          | 70.382  | 70.6955 | 0.995565489 |
| Hsf2          | 9.489   | 9.534   | 0.99528005  |
| Zfp202        | 2.4665  | 2.479   | 0.994957644 |
| Itpka         | 1.1805  | 1.1865  | 0.99494311  |
| Ctnna2        | 15.9665 | 16.049  | 0.994859493 |
| Rps6kc1       | 11.158  | 11.2175 | 0.994695788 |
| Cpne5         | 7.479   | 7.5205  | 0.99448175  |
| Gm8101        | 6.668   | 6.7055  | 0.994407576 |
| Pacrgl        | 7.272   | 7.3135  | 0.994325562 |
| 4833424O15Rik | 4.5155  | 4.542   | 0.994165566 |
| Dbc1          | 22.6155 | 22.7535 | 0.993934999 |
| Pcp4l1        | 55.0255 | 55.362  | 0.993921824 |
| Ccdc90a       | 1.8675  | 1.879   | 0.993879723 |
| Csmd3         | 2.919   | 2.938   | 0.993533016 |
| Degs1         | 31.425  | 31.63   | 0.993518811 |
| Pcnx13        | 5.8     | 5.8385  | 0.993405841 |
| Klhl29        | 7.523   | 7.575   | 0.993135314 |
| Cand1         | 24.024  | 24.2035 | 0.992583717 |
| Suox          | 6.6855  | 6.736   | 0.992502969 |
| Rab13         | 12.857  | 12.9565 | 0.992320457 |
| Nup205        | 1.7895  | 1.8035  | 0.992237316 |
| Zfp280b       | 14.553  | 14.668  | 0.992159804 |
| 6530401N04Rik | 10.8415 | 10.928  | 0.992084553 |
| Clasp1        | 24.3425 | 24.5395 | 0.991972127 |
| Rabgef1       | 10.6105 | 10.6975 | 0.991867259 |
| Pigt          | 35.7355 | 36.029  | 0.991853784 |
| Ccdc88c       | 2.209   | 2.2275  | 0.991694725 |
| St3gal4       | 4.405   | 4.442   | 0.991670419 |
| Tnr           | 9.699   | 9.781   | 0.991616399 |
| Wipi2         | 18.981  | 19.1445 | 0.991459688 |
| Pfkm          | 58.5105 | 59.051  | 0.990846895 |
| Trex1         | 5.7005  | 5.7535  | 0.990788216 |
| Gigyf1        | 3.8825  | 3.919   | 0.9906864   |

|               |          |          |             |
|---------------|----------|----------|-------------|
| Nudt11        | 10.8395  | 10.943   | 0.990541899 |
| Slmo1         | 30.997   | 31.3     | 0.990319489 |
| Dsel          | 1.747    | 1.7645   | 0.990082176 |
| Ubqln2        | 65.6725  | 66.3575  | 0.989677128 |
| Bpil2         | 10.274   | 10.3825  | 0.989549723 |
| Acat2         | 21.096   | 21.319   | 0.989539847 |
| Nol11         | 6.0425   | 6.1065   | 0.989519365 |
| Rer1          | 33.26    | 33.613   | 0.989498111 |
| Rps15a        | 59.0025  | 59.652   | 0.989111849 |
| Wdr7          | 48.2095  | 48.755   | 0.988811404 |
| Adar          | 37.4835  | 37.909   | 0.988775752 |
| Tb13          | 5.3235   | 5.3845   | 0.988671186 |
| Dpysl3        | 17.265   | 17.466   | 0.988491927 |
| Zfyve20       | 10.2865  | 10.4075  | 0.988373769 |
| Grin3a        | 8.2585   | 8.3585   | 0.988036131 |
| Flcn          | 9.3865   | 9.501    | 0.987948637 |
| Ttc3          | 221.7525 | 224.4915 | 0.987799093 |
| Mmp24         | 12.8755  | 13.0355  | 0.987725826 |
| Ehmt2         | 12.2085  | 12.362   | 0.987582915 |
| Erc2          | 20.7045  | 20.965   | 0.987574529 |
| Gm11964       | 5.716    | 5.788    | 0.98756047  |
| Zswim3        | 4.377    | 4.433    | 0.987367471 |
| 1500002O20Rik | 4.1305   | 4.1835   | 0.987331182 |
| Iah1          | 6.242    | 6.3225   | 0.987267695 |
| Dalrd3        | 25.539   | 25.873   | 0.98709079  |
| Cacna1e       | 15.081   | 15.2785  | 0.987073338 |
| Adap1         | 17.893   | 18.128   | 0.987036628 |
| Odz3          | 11.7045  | 11.8585  | 0.987013535 |
| Mkrn1         | 32.524   | 32.96    | 0.986771845 |
| Gm9000        | 1.142    | 1.1575   | 0.986609071 |
| Nsf           | 323.8535 | 328.324  | 0.986383877 |
| Pja1          | 112.1805 | 113.7335 | 0.986345272 |
| Sel113        | 1.757    | 1.7815   | 0.986247544 |
| Slc38a10      | 5.931    | 6.014    | 0.986198869 |
| Nrbf2         | 8.4275   | 8.5465   | 0.986076172 |
| Skiv212       | 40.805   | 41.382   | 0.98605674  |
| Nanos1        | 6.9555   | 7.0545   | 0.985966404 |
| Socs6         | 4.3345   | 4.3965   | 0.985897873 |
| Hif1a         | 9.711    | 9.8525   | 0.985638163 |
| Rpf1          | 10.541   | 10.696   | 0.985508601 |
| Uba5          | 35.873   | 36.409   | 0.985278365 |
| Lmo1          | 2.888    | 2.9315   | 0.98516118  |
| Dync1li1      | 37.2615  | 37.846   | 0.984555832 |
| Rnf215        | 3.35     | 3.403    | 0.984425507 |
| Mfng          | 2.7045   | 2.7475   | 0.984349409 |
| 2310028H24Rik | 38.5095  | 39.1225  | 0.984331267 |
| Pex14         | 15.2535  | 15.4985  | 0.984192019 |
| Slc25a38      | 16.2015  | 16.463   | 0.984115896 |
| Bat2          | 71.386   | 72.5405  | 0.984084753 |
| Fzd5          | 1.6385   | 1.665    | 0.984084084 |
| BC013529      | 4.5615   | 4.6355   | 0.984036242 |
| Brd1          | 13.4555  | 13.6755  | 0.983912837 |
| Thada         | 3.884    | 3.9485   | 0.983664683 |
| Vps53         | 51.096   | 51.954   | 0.983485391 |
| Rpl7a         | 443.439  | 450.8945 | 0.98346509  |

|               |          |         |             |
|---------------|----------|---------|-------------|
| Setd6         | 10.543   | 10.7205 | 0.983442936 |
| Tmem110       | 3.1055   | 3.158   | 0.983375554 |
| Cnnm1         | 30.062   | 30.576  | 0.98318943  |
| Ctnnb1        | 84.55    | 86.018  | 0.982933805 |
| Ddrgk1        | 16.253   | 16.5355 | 0.982915545 |
| Bat2l         | 61.374   | 62.4425 | 0.982888257 |
| Hcn2          | 4.092    | 4.164   | 0.982708934 |
| Adcy3         | 4.383    | 4.4605  | 0.982625266 |
| Pvr1l         | 5.716    | 5.818   | 0.982468202 |
| Tmco1         | 8.065    | 8.209   | 0.982458278 |
| Usp38         | 7.2935   | 7.424   | 0.982421875 |
| Tm6sf1        | 1.134    | 1.1545  | 0.982243395 |
| 2410001C21Rik | 14       | 14.2585 | 0.981870463 |
| Ccdc137       | 8.611    | 8.772   | 0.981646147 |
| Samd10        | 12.826   | 13.07   | 0.981331293 |
| Rbbp7         | 29.0985  | 29.6575 | 0.981151479 |
| Prss30        | 1.247    | 1.271   | 0.981117231 |
| B230120H23Rik | 7.6195   | 7.771   | 0.98050444  |
| Slc35a2       | 6.2      | 6.3235  | 0.980469677 |
| Ssbp2         | 17.867   | 18.225  | 0.980356653 |
| Ogfod1        | 93.62    | 95.5105 | 0.980206365 |
| Der1l         | 12.8765  | 13.14   | 0.979946728 |
| Srsf13b       | 30.7355  | 31.3765 | 0.979570698 |
| Spef1         | 1.1945   | 1.2195  | 0.979499795 |
| Metap2        | 32.5665  | 33.2515 | 0.979399426 |
| Carm1         | 29.717   | 30.346  | 0.979272392 |
| Parm1         | 25.379   | 25.9175 | 0.979222533 |
| Mobkl2a       | 5.968    | 6.096   | 0.979002625 |
| Wnt7a         | 1.6075   | 1.642   | 0.978989038 |
| Ube2o         | 20.058   | 20.49   | 0.978916545 |
| Rpn1          | 18.7465  | 19.154  | 0.97872507  |
| Ttc35         | 16.972   | 17.3425 | 0.978636298 |
| Rpl2l         | 305.2705 | 311.974 | 0.978512632 |
| G3bp2         | 233.095  | 238.224 | 0.978469844 |
| LOC100503125  | 2.7705   | 2.8315  | 0.978456648 |
| Tnfrsf21      | 43.5165  | 44.475  | 0.978448567 |
| Aasdh         | 1.588    | 1.6235  | 0.978133662 |
| Ptov1         | 49.786   | 50.91   | 0.977921823 |
| Dpy19l1       | 9.9355   | 10.16   | 0.977903543 |
| Stard10       | 8.7125   | 8.9095  | 0.97788877  |
| Chrna4        | 13.5905  | 13.8995 | 0.977768984 |
| Rgl1          | 29.401   | 30.077  | 0.977524354 |
| Mto1          | 7.4945   | 7.6675  | 0.977437235 |
| Nalcn         | 11.886   | 12.1605 | 0.977426915 |
| Ldoc1l        | 11.7455  | 12.017  | 0.977407007 |
| Dhx57         | 16.593   | 16.979  | 0.977266035 |
| Rpl3l         | 146.219  | 149.634 | 0.977177647 |
| Gm9883        | 1.004    | 1.0275  | 0.977128954 |
| Detn2         | 49.735   | 50.9055 | 0.977006414 |
| Cd200r2       | 4.732    | 4.8435  | 0.976979457 |
| Mthfd1        | 5.0815   | 5.2015  | 0.976929732 |
| Slc46a3       | 2.1585   | 2.2095  | 0.976917855 |
| Akirin2       | 18.6455  | 19.095  | 0.976459806 |
| Zwint         | 139.249  | 142.611 | 0.976425381 |
| Rnf146        | 7.127    | 7.3     | 0.97630137  |

|               |          |          |             |
|---------------|----------|----------|-------------|
| Zfp422        | 12.2125  | 12.509   | 0.976297066 |
| Mtap7d2       | 92.3325  | 94.5805  | 0.976231887 |
| Chchd5        | 10.3815  | 10.6365  | 0.976025948 |
| Ercc3         | 20.7315  | 21.2455  | 0.975806641 |
| Gmpr          | 7.616    | 7.805    | 0.975784753 |
| Isl1          | 12.9025  | 13.2235  | 0.975725035 |
| Epb4.114a     | 5.5795   | 5.72     | 0.975437063 |
| Kctd5         | 3.3505   | 3.435    | 0.975400291 |
| Pbx3          | 44.2755  | 45.3925  | 0.975392411 |
| Gm10931       | 2.7985   | 2.87     | 0.975087108 |
| Lmb1          | 1.8185   | 1.865    | 0.975067024 |
| Rab5c         | 64.395   | 66.0455  | 0.975009652 |
| Mon2          | 8.78     | 9.0055   | 0.974959747 |
| Oas3          | 3.479    | 3.5685   | 0.974919434 |
| Psmf1         | 11.245   | 11.5355  | 0.97481687  |
| Ntng2         | 2.473    | 2.537    | 0.974773354 |
| Ddx5          | 114.818  | 117.791  | 0.974760381 |
| Lsm14b        | 17.2455  | 17.694   | 0.974652425 |
| Ndr3          | 174.7635 | 179.3615 | 0.974364621 |
| Stard7        | 23.4125  | 24.029   | 0.974343502 |
| Gm16532       | 18.6395  | 19.131   | 0.974308714 |
| Larp7         | 16.82    | 17.264   | 0.974281742 |
| Gorasp2       | 50.3035  | 51.6425  | 0.974071743 |
| Nisch         | 82.048   | 84.241   | 0.973967545 |
| Cntnap4       | 8.4795   | 8.707    | 0.973871598 |
| Adss          | 36.469   | 37.449   | 0.973831077 |
| Pdp1          | 12.769   | 13.1125  | 0.973803622 |
| Slc35a5       | 4.3335   | 4.4505   | 0.973710819 |
| Pigs          | 20.533   | 21.0945  | 0.973381687 |
| Synpo         | 7.6055   | 7.8135   | 0.973379407 |
| Tor2a         | 3.0685   | 3.153    | 0.973200127 |
| Rexo1         | 6.8545   | 7.045    | 0.972959546 |
| Txndc11       | 5.721    | 5.8815   | 0.972711043 |
| Ltv1          | 10.23    | 10.5175  | 0.972664607 |
| Gab2          | 8.8355   | 9.084    | 0.97264421  |
| Nhlrc1        | 8.858    | 9.1075   | 0.972604996 |
| Ccnk          | 54.7045  | 56.2505  | 0.9725158   |
| Cerk          | 5.89     | 6.057    | 0.972428595 |
| Mtfmt         | 6.2595   | 6.4375   | 0.972349515 |
| Cpsf7         | 22.5365  | 23.1775  | 0.972343868 |
| Plch1         | 5.179    | 5.3275   | 0.972125763 |
| Uap1          | 10.4275  | 10.7305  | 0.971762732 |
| Isoc1         | 19.845   | 20.422   | 0.971746156 |
| Cand2         | 3.7245   | 3.833    | 0.971693191 |
| Mn1           | 3.0765   | 3.1665   | 0.971577451 |
| Fam43b        | 3.2925   | 3.389    | 0.971525524 |
| Hprt          | 127.648  | 131.3955 | 0.971479236 |
| Fgd1          | 5.377    | 5.535    | 0.971454381 |
| Lhx6          | 65.393   | 67.3175  | 0.971411594 |
| Pola2         | 3.0345   | 3.1245   | 0.971195391 |
| Mid2          | 12.6445  | 13.021   | 0.97108517  |
| 6030458C11Rik | 17.4875  | 18.0235  | 0.970261048 |
| Fto           | 59.7875  | 61.6355  | 0.970017279 |
| LOC100504245  | 3.042    | 3.1375   | 0.969561753 |
| Hcrtr2        | 1.3675   | 1.4105   | 0.969514357 |

|               |          |          |             |
|---------------|----------|----------|-------------|
| Csnk1a1       | 65.855   | 67.9295  | 0.969460985 |
| Ctnnb1        | 5.4495   | 5.6225   | 0.969230769 |
| Dld           | 49.789   | 51.37    | 0.969223282 |
| Tspan12       | 3.403    | 3.5115   | 0.969101524 |
| Klhl1         | 7.8585   | 8.1095   | 0.969048647 |
| Vps26b        | 21.7645  | 22.46    | 0.969033838 |
| Zcchc18       | 88.77    | 91.6185  | 0.968909118 |
| C330006K01Rik | 2.3955   | 2.4725   | 0.968857432 |
| Exosc3        | 13.68    | 14.121   | 0.968769917 |
| Lrwd1         | 1.3345   | 1.378    | 0.968432511 |
| Tnnt2         | 14.753   | 15.235   | 0.968362324 |
| Fam179b       | 8.7505   | 9.04     | 0.967975664 |
| Tsnax         | 90.8025  | 93.817   | 0.967868297 |
| Eif5b         | 32.5785  | 33.6635  | 0.967769246 |
| Gm9776        | 5.229    | 5.4035   | 0.967706116 |
| Rab5a         | 24.9535  | 25.791   | 0.967527432 |
| Poldip3       | 38.049   | 39.327   | 0.967503242 |
| Atp6ap1       | 89.1545  | 92.184   | 0.967136379 |
| Hmgxb3        | 4.575    | 4.7305   | 0.967128211 |
| Mcm6          | 1.235    | 1.277    | 0.967110415 |
| Dnajc2        | 29.2415  | 30.2405  | 0.966964832 |
| Rpl5          | 102.58   | 106.09   | 0.966914884 |
| Puf60         | 45.9835  | 47.5575  | 0.966903222 |
| Spnb3         | 5.72     | 5.9165   | 0.966787797 |
| Gse1          | 14.6055  | 15.1125  | 0.966451613 |
| Brp16         | 5.528    | 5.72     | 0.966433566 |
| Tnfrsf11a     | 5.1605   | 5.34     | 0.966385768 |
| Ltbp4         | 2.7475   | 2.8435   | 0.96623879  |
| Dnajb1        | 59.056   | 61.1245  | 0.966159232 |
| Ywhaq         | 166.7185 | 172.6675 | 0.965546498 |
| Os9           | 12.782   | 13.24    | 0.965407855 |
| Efha1         | 19.357   | 20.052   | 0.965340116 |
| Fstl4         | 2.1015   | 2.177    | 0.965319247 |
| Gnl1          | 26.5505  | 27.505   | 0.965297219 |
| Epdr1         | 24.6795  | 25.57    | 0.965174032 |
| Prep          | 7.937    | 8.2245   | 0.965043468 |
| Rbm14         | 7.2835   | 7.548    | 0.964957605 |
| Reln          | 2.9      | 3.0055   | 0.964897688 |
| Nlgn2         | 37.263   | 38.633   | 0.964538089 |
| Gnao1         | 627.109  | 650.231  | 0.96444033  |
| Abca3         | 6.697    | 6.944    | 0.964429724 |
| Morc2a        | 10.4655  | 10.8525  | 0.964340014 |
| Gm13308       | 9.958    | 10.3265  | 0.964315112 |
| Eif3f         | 47.35    | 49.105   | 0.964260259 |
| Abhd13        | 3.6135   | 3.7485   | 0.963985594 |
| Spock3        | 15.063   | 15.626   | 0.963970306 |
| Thoc4         | 5.831    | 6.05     | 0.963801653 |
| Lrrn2         | 18.529   | 19.2275  | 0.963671824 |
| Syn1          | 239.8155 | 248.857  | 0.96366789  |
| Tefcp2l1      | 1.6475   | 1.71     | 0.963450292 |
| Extl2         | 26.976   | 28       | 0.963428571 |
| Cyp46a1       | 22.937   | 23.808   | 0.963415659 |
| Uba3          | 17.9285  | 18.613   | 0.963224628 |
| Fbxw5         | 49.6005  | 51.5005  | 0.963107154 |
| Jkamp         | 15.5115  | 16.107   | 0.963028497 |

|               |           |          |             |
|---------------|-----------|----------|-------------|
| Tmem109       | 3.9535    | 4.1055   | 0.962976495 |
| Rab28         | 14.119    | 14.6645  | 0.962801323 |
| Acrbp         | 1.6405    | 1.704    | 0.962734742 |
| Wdfy3         | 24.8735   | 25.8395  | 0.962615376 |
| Zcchc14       | 11.2385   | 11.6755  | 0.962571196 |
| Nkx2-1        | 6.6       | 6.857    | 0.962520053 |
| Farp2         | 2.0785    | 2.1595   | 0.962491317 |
| Atp2b4        | 16.833    | 17.49    | 0.962435678 |
| Fgf12         | 61.4885   | 63.8945  | 0.962344177 |
| Gpbp1         | 46.441    | 48.2595  | 0.9623183   |
| Stmn2         | 259.994   | 270.2045 | 0.962211954 |
| Wdr33         | 8.1805    | 8.5025   | 0.962128786 |
| Kbtbd2        | 24.8655   | 25.8475  | 0.962007931 |
| Olfm3         | 9.8125    | 10.204   | 0.961632693 |
| Syt9          | 8.2135    | 8.542    | 0.961542964 |
| Ppme1         | 41.0985   | 42.7565  | 0.96122227  |
| Gstm3         | 1.111     | 1.156    | 0.961072664 |
| Ptpn          | 66.7135   | 69.421   | 0.960998833 |
| Gpr158        | 12.5845   | 13.0995  | 0.960685522 |
| Slc25a17      | 24.3515   | 25.349   | 0.960649335 |
| Mon1a         | 6.0405    | 6.288    | 0.960639313 |
| Dock1         | 3.7345    | 3.8885   | 0.96039604  |
| Hapln4        | 34.4      | 35.8225  | 0.96029032  |
| Slc6a1        | 70.1865   | 73.103   | 0.960104236 |
| Gmps          | 23.412    | 24.3855  | 0.960078735 |
| Zmat2         | 52.9375   | 55.139   | 0.960073632 |
| Cpne2         | 39.105    | 40.734   | 0.960008838 |
| Hnrnph1       | 108.0975  | 112.613  | 0.959902498 |
| Rragb         | 17.9155   | 18.664   | 0.959896057 |
| Vps45         | 5.775     | 6.0165   | 0.959860384 |
| Mcoln1        | 7.1945    | 7.4955   | 0.959842572 |
| Cdk5rap1      | 1.8955    | 1.976    | 0.959261134 |
| Mkl1          | 8.5415    | 8.909    | 0.958749579 |
| Brap          | 14.908    | 15.552   | 0.958590535 |
| Ube2z         | 21.3015   | 22.2285  | 0.958296781 |
| Uba6          | 8.1175    | 8.4715   | 0.958212831 |
| Dars          | 16.3655   | 17.0795  | 0.958195498 |
| Zfp426        | 14.294    | 14.9205  | 0.958010791 |
| Ccdc64        | 2.052     | 2.142    | 0.957983193 |
| Camkk1        | 10.6885   | 11.1605  | 0.957707988 |
| Ift57         | 19.736    | 20.62    | 0.957129001 |
| Pik3r3        | 11.9265   | 12.4665  | 0.956683913 |
| Gatc          | 56.3395   | 58.893   | 0.956641706 |
| Lgi1          | 20.0505   | 20.963   | 0.956470925 |
| Eif4a3        | 31.7465   | 33.195   | 0.95636391  |
| 6330439K17Rik | 82.281    | 86.0395  | 0.956316576 |
| E2f1          | 9.6475    | 10.0885  | 0.956286861 |
| Mgp           | 1.89      | 1.9765   | 0.95623577  |
| A330021E22Rik | 4.1605    | 4.351    | 0.956216962 |
| Glrb          | 39.7835   | 41.6105  | 0.956092813 |
| D16H22S680E   | 15.351    | 16.056   | 0.956091181 |
| Ube2k         | 51.649    | 54.021   | 0.95609115  |
| Umps          | 2.93      | 3.065    | 0.955954323 |
| Sert1         | 14.6175   | 15.295   | 0.955704479 |
| Eef1a1        | 1101.6225 | 1152.751 | 0.955646536 |



|               |          |          |             |
|---------------|----------|----------|-------------|
| Celsr3        | 4.061    | 4.2495   | 0.95564184  |
| Smchd1        | 3.6175   | 3.7855   | 0.955620129 |
| Yipf4         | 4.4625   | 4.67     | 0.955567452 |
| Sipa1l3       | 12.3035  | 12.8795  | 0.955277767 |
| Yme1l1        | 12.97    | 13.578   | 0.955221682 |
| Xk            | 12.093   | 12.66    | 0.95521327  |
| Hltf          | 5.234    | 5.48     | 0.955109489 |
| Gm15800       | 30.909   | 32.363   | 0.95507215  |
| Trim62        | 13.4815  | 14.1245  | 0.954476265 |
| Pih1d1        | 6.0325   | 6.3205   | 0.954433985 |
| Vcp           | 80.8825  | 84.745   | 0.95442209  |
| Baiap2        | 21.1585  | 22.1695  | 0.954396806 |
| Snarin        | 55.189   | 57.8265  | 0.954389424 |
| Rpl13         | 377.284  | 395.3865 | 0.954215685 |
| Ncaph2        | 5.1285   | 5.375    | 0.954139535 |
| Fchsd2        | 36.37    | 38.125   | 0.953967213 |
| Nqo1          | 1.0745   | 1.1265   | 0.953839325 |
| Itm2c         | 90.118   | 94.493   | 0.953700274 |
| Rab11fip3     | 20.097   | 21.077   | 0.953503819 |
| Myo10         | 7.2485   | 7.602    | 0.953499079 |
| Ric8          | 10.6345  | 11.157   | 0.953168414 |
| Chga          | 29.5325  | 30.9915  | 0.952922576 |
| Zfp94         | 4.1395   | 4.3445   | 0.952813903 |
| Sv2b          | 12.762   | 13.3995  | 0.952423598 |
| Eid2b         | 8.6005   | 9.0305   | 0.952383589 |
| Capzb         | 220.379  | 231.41   | 0.95233136  |
| Vps52         | 11.8225  | 12.4165  | 0.952160432 |
| Rpl13a        | 237.651  | 249.6185 | 0.952056839 |
| 1700040L02Rik | 1.573    | 1.6525   | 0.951891074 |
| Chd5          | 38.2645  | 40.2065  | 0.951699352 |
| Ptk2b         | 4.8705   | 5.118    | 0.951641266 |
| Ttc4          | 8.409    | 8.837    | 0.951567274 |
| Hsbp1l1       | 2.0485   | 2.153    | 0.951463075 |
| Guk1          | 57.7875  | 60.737   | 0.951438168 |
| Whsc2         | 28.79    | 30.262   | 0.951358139 |
| Rsrc2         | 46.037   | 48.3935  | 0.951305444 |
| Usp5          | 29.8655  | 31.395   | 0.951282051 |
| 5730469M10Rik | 101.9355 | 107.17   | 0.95115704  |
| Zfp420        | 5.951    | 6.261    | 0.950487143 |
| Jagn1         | 43.415   | 45.68    | 0.950415937 |
| H2-Eb1        | 4.588    | 4.8275   | 0.9503884   |
| Ahsa2         | 5.6735   | 5.972    | 0.950016745 |
| Prickle1      | 10.296   | 10.839   | 0.949903128 |
| Tmem28        | 4.6445   | 4.8895   | 0.949892627 |
| Ptptr         | 13.6745  | 14.3965  | 0.949848922 |
| Limch1        | 10.413   | 10.963   | 0.949831251 |
| Orai2         | 9.49     | 9.9915   | 0.949807336 |
| Eef2          | 280.9785 | 295.884  | 0.949623839 |
| Hist3h2a      | 16.069   | 16.9215  | 0.949620306 |
| Rpl11         | 401.6485 | 423.1735 | 0.949134339 |
| Mrpl19        | 10.7335  | 11.309   | 0.949111327 |
| Aff2          | 42.4965  | 44.7815  | 0.948974465 |
| Cendbp1       | 78.457   | 82.688   | 0.948831753 |
| Atl1          | 23.671   | 24.948   | 0.948813532 |
| Ntm           | 104.688  | 110.3505 | 0.948686232 |

|               |          |          |             |
|---------------|----------|----------|-------------|
| Cs            | 105.4665 | 111.174  | 0.948661558 |
| Sec24d        | 4.388    | 4.6255   | 0.9486542   |
| Nedd4         | 123.581  | 130.2785 | 0.948590903 |
| Synpo2        | 1.3375   | 1.41     | 0.94858156  |
| Snrnp25       | 6.6665   | 7.029    | 0.948427941 |
| Tmed1         | 3.446    | 3.6335   | 0.948396863 |
| Yars          | 26.1085  | 27.531   | 0.948330972 |
| Hdgfrp2       | 22.5565  | 23.7895  | 0.948170411 |
| Tpp2          | 6.6895   | 7.0555   | 0.948125576 |
| Zfp30         | 7.1035   | 7.4925   | 0.948081415 |
| Tpml          | 110.809  | 116.922  | 0.947717282 |
| Fam116b       | 3.2335   | 3.412    | 0.947684642 |
| Zcchc2        | 7.33     | 7.736    | 0.947518097 |
| Sostdc1       | 4.8705   | 5.1405   | 0.947475926 |
| Klhl9         | 35.2175  | 37.171   | 0.947445589 |
| Zfp764        | 1.487    | 1.5695   | 0.947435489 |
| Wwox          | 11.1225  | 11.74    | 0.947402044 |
| Sord          | 5.5325   | 5.84     | 0.94734589  |
| Fpgt          | 3.8215   | 4.034    | 0.947322757 |
| Zfp599        | 2.7765   | 2.931    | 0.947287615 |
| Pars2         | 1.5705   | 1.658    | 0.947225573 |
| Glt8d1        | 5.0605   | 5.3435   | 0.947038458 |
| Usf1          | 7.982    | 8.4295   | 0.946912628 |
| Arpc3         | 27.547   | 29.097   | 0.946729903 |
| Sez6          | 12.184   | 12.87    | 0.946697747 |
| Fam65a        | 36.8725  | 38.957   | 0.946492286 |
| D1Ert622e     | 6.3745   | 6.736    | 0.946333135 |
| Ngdn          | 11.78    | 12.451   | 0.946108746 |
| Slc25a46      | 22.0095  | 23.2675  | 0.945933169 |
| Gipc2         | 2.0875   | 2.207    | 0.945854101 |
| LOC100503412  | 2.878    | 3.043    | 0.945777194 |
| L2hgdh        | 22.314   | 23.5965  | 0.945648719 |
| Klhdc8b       | 5.3825   | 5.6935   | 0.945376306 |
| Zfp395        | 15.6105  | 16.513   | 0.945346091 |
| Pard3b        | 1.5775   | 1.669    | 0.945176753 |
| 6430598A04Rik | 11.9395  | 12.634   | 0.945029286 |
| Hmgcr         | 7.3885   | 7.821    | 0.944700166 |
| Msh2          | 13.13    | 13.899   | 0.944672279 |
| Syng1         | 42.663   | 45.162   | 0.94466587  |
| Ank2          | 58.4505  | 61.8785  | 0.944601113 |
| Ptd1          | 5.2315   | 5.5385   | 0.944569829 |
| 1810048J11Rik | 11.336   | 12.0015  | 0.944548598 |
| Prkar1a       | 304.8855 | 322.876  | 0.944280467 |
| Fhl1          | 85.789   | 90.872   | 0.944064178 |
| Rec8          | 4.5225   | 4.7905   | 0.944055944 |
| Dtd1          | 172.533  | 182.7815 | 0.943930321 |
| Kcnip4        | 52.711   | 55.85    | 0.943795882 |
| Ppp6r1        | 13.4035  | 14.2055  | 0.943542994 |
| 0610011L14Rik | 7.356    | 7.7985   | 0.943258319 |
| LOC100504449  | 1.4115   | 1.4965   | 0.943200802 |
| Ccdc115       | 22.3025  | 23.655   | 0.942823927 |
| Gm6654        | 14.538   | 15.42    | 0.942801556 |
| Clcn2         | 2.082    | 2.2085   | 0.942721304 |
| Gtf3c1        | 14.273   | 15.1475  | 0.942267701 |
| Calb2         | 53.936   | 57.2415  | 0.942253435 |

|               |          |         |             |
|---------------|----------|---------|-------------|
| L1cam         | 60.3775  | 64.0795 | 0.942228014 |
| Esf1          | 7.8725   | 8.3555  | 0.942193765 |
| Tmeff1        | 7.7385   | 8.2145  | 0.942053686 |
| Zc3h6         | 4.263    | 4.5255  | 0.94199536  |
| Zcrb1         | 107.8055 | 114.444 | 0.941993464 |
| Gnb1          | 338.393  | 359.239 | 0.941971779 |
| Golph3        | 44.3365  | 47.0695 | 0.941936923 |
| Sfpq          | 21.3145  | 22.6315 | 0.941806774 |
| Ciz1          | 20.888   | 22.1825 | 0.941643187 |
| Rpl41         | 818.1415 | 868.898 | 0.941585203 |
| Ncln          | 2.509    | 2.665   | 0.941463415 |
| Nfs1          | 11.576   | 12.296  | 0.941444372 |
| Kdm4a         | 3.227    | 3.428   | 0.941365228 |
| Txndc15       | 12.309   | 13.076  | 0.941342918 |
| Lrrn3         | 12.06    | 12.812  | 0.941305027 |
| Hspb1         | 2.693    | 2.861   | 0.941279273 |
| Arhgap27      | 10.5725  | 11.233  | 0.941200036 |
| Fbxo38        | 8.6975   | 9.2415  | 0.941135097 |
| Hibadh        | 12.964   | 13.7775 | 0.940954455 |
| Leprotil      | 23.1445  | 24.597  | 0.940948083 |
| Grik5         | 15.64    | 16.6225 | 0.940893367 |
| Nup50         | 24.6355  | 26.1865 | 0.940771008 |
| Grin2d        | 2.248    | 2.3905  | 0.94038904  |
| Nme5          | 13.3955  | 14.245  | 0.94036504  |
| 9330161L09Rik | 1.0855   | 1.1545  | 0.940233867 |
| Xrcc1         | 3.614    | 3.845   | 0.939921977 |
| Csnk2a1       | 28.662   | 30.5085 | 0.939475884 |
| Zfp68         | 7.373    | 7.8495  | 0.939295497 |
| Nuak1         | 4.911    | 5.2285  | 0.939275127 |
| BC017643      | 2.4035   | 2.559   | 0.939234076 |
| Ppap2c        | 4.347    | 4.6285  | 0.93918116  |
| Dynlt3        | 66.676   | 71.0355 | 0.938629277 |
| Psip1         | 82.129   | 87.5    | 0.938617143 |
| Kctd1         | 14.771   | 15.7385 | 0.938526543 |
| Trhde         | 5.0625   | 5.3955  | 0.938281902 |
| Ndufs2        | 106.436  | 113.471 | 0.93800178  |
| Camkv         | 21.988   | 23.444  | 0.937894557 |
| Yars2         | 6.258    | 6.673   | 0.937809081 |
| Grik1         | 8.437    | 8.9975  | 0.937704918 |
| Slc9a9        | 2.6335   | 2.8085  | 0.937689158 |
| Trappc10      | 17.2335  | 18.3805 | 0.93759691  |
| Brd7          | 11.483   | 12.2495 | 0.937426017 |
| D630023F18Rik | 7.932    | 8.462   | 0.937367053 |
| Gspt1         | 9.691    | 10.339  | 0.937324693 |
| Abcb10        | 6.397    | 6.825   | 0.937289377 |
| Dap           | 7.1285   | 7.6065  | 0.937159009 |
| LOC100504360  | 2.7075   | 2.89    | 0.936851211 |
| Rdh14         | 6.1705   | 6.587   | 0.936769394 |
| Pedh19        | 10.758   | 11.4845 | 0.936740825 |
| Zechc10       | 11.636   | 12.422  | 0.936725165 |
| 2900064A13Rik | 61.6995  | 65.8725 | 0.936650347 |
| Wtap          | 9.7545   | 10.4185 | 0.936267217 |
| Dym           | 24.024   | 25.6615 | 0.936188454 |
| Grsf1         | 31.4365  | 33.5815 | 0.936125545 |
| Rusc1         | 33.9025  | 36.2245 | 0.935899736 |

|               |          |          |             |
|---------------|----------|----------|-------------|
| Klhl26        | 6.034    | 6.4485   | 0.935721486 |
| Ipo13         | 15.081   | 16.117   | 0.935720047 |
| Bnip3         | 35.654   | 38.106   | 0.935653178 |
| Kcnip1        | 39.883   | 42.626   | 0.935649604 |
| Arpc1a        | 58.919   | 62.9715  | 0.93564549  |
| C030006K11Rik | 6.772    | 7.2385   | 0.935552946 |
| 1500009L16Rik | 15.1445  | 16.191   | 0.935365326 |
| Nanp          | 3.983    | 4.259    | 0.935196055 |
| Smarce1       | 20.299   | 21.706   | 0.935179213 |
| Scg3          | 52.4515  | 56.089   | 0.935147712 |
| Erc1          | 15.343   | 16.409   | 0.935035651 |
| Hcn3          | 8.3685   | 8.95     | 0.935027933 |
| Ntng1         | 12.528   | 13.399   | 0.934995149 |
| Ncapd2        | 1.8335   | 1.9615   | 0.934743819 |
| Bsdc1         | 41.791   | 44.718   | 0.934545373 |
| Qrs11         | 4.0705   | 4.356    | 0.934458219 |
| Lpin2         | 26.7925  | 28.6735  | 0.934399358 |
| Hr            | 1.8365   | 1.9655   | 0.934367845 |
| Bhlhe40       | 37.825   | 40.4885  | 0.934215888 |
| Ccdc120       | 1.5385   | 1.647    | 0.934122647 |
| Coq10a        | 13.088   | 14.0125  | 0.934023194 |
| Rqcd1         | 9.3215   | 9.981    | 0.933924456 |
| Letm1         | 14.666   | 15.706   | 0.933783268 |
| Taz           | 6.6655   | 7.1385   | 0.933739581 |
| Dhx16         | 2.2265   | 2.385    | 0.933542977 |
| Atp6v1b2      | 320.5675 | 343.3905 | 0.933536309 |
| Acp1          | 73.5035  | 78.7375  | 0.933525957 |
| Pygm          | 3.5565   | 3.81     | 0.933464567 |
| Cc2d1b        | 3.244    | 3.4755   | 0.933390879 |
| Hnrnpa0       | 67.243   | 72.049   | 0.933295396 |
| Tmem107       | 3.232    | 3.4635   | 0.933160098 |
| Rps27         | 424.544  | 454.9855 | 0.933093472 |
| Fam120c       | 12.258   | 13.1385  | 0.932983217 |
| Gpr180        | 13.878   | 14.875   | 0.93297479  |
| Faim          | 42.646   | 45.713   | 0.932907488 |
| Akna          | 1.738    | 1.863    | 0.932903918 |
| Acaa2         | 7.297    | 7.822    | 0.932881616 |
| Wdr17         | 6.149    | 6.5935   | 0.932585122 |
| 9930104L06Rik | 7.2405   | 7.7655   | 0.932393278 |
| Cog7          | 5.7855   | 6.205    | 0.932393231 |
| Ccdc61        | 1.9445   | 2.0855   | 0.932390314 |
| Pef1          | 16.149   | 17.32    | 0.9323903   |
| Iqcb1         | 9.673    | 10.3745  | 0.932382283 |
| Tank          | 9.9885   | 10.7135  | 0.932328371 |
| Hrasls        | 9.934    | 10.6555  | 0.93228849  |
| Hsf1          | 29.9415  | 32.1205  | 0.932161704 |
| Scn8a         | 26.2465  | 28.169   | 0.931751216 |
| Rnf160        | 7.056    | 7.573    | 0.93173115  |
| Amz2          | 12.8365  | 13.7795  | 0.931565006 |
| Ranbp9        | 23.472   | 25.1985  | 0.931484017 |
| Ppp2r3c       | 9.63     | 10.3405  | 0.931289589 |
| Iqsec1        | 43.097   | 46.2835  | 0.931152571 |
| Gm5959        | 2.6885   | 2.8875   | 0.931082251 |
| Usp29         | 69.3285  | 74.4625  | 0.931052543 |
| 6030446N20Rik | 1.599    | 1.7175   | 0.931004367 |

|               |         |          |             |
|---------------|---------|----------|-------------|
| Slc38a1       | 51.956  | 55.8105  | 0.930935935 |
| Nap114        | 50.503  | 54.275   | 0.930502073 |
| Chn1          | 89.5025 | 96.196   | 0.930418105 |
| Polr1b        | 3.2015  | 3.441    | 0.93039814  |
| Smu1          | 14.799  | 15.907   | 0.930345131 |
| Kbtbd3        | 3.153   | 3.3905   | 0.929951335 |
| Ulk1          | 34.274  | 36.868   | 0.929640881 |
| Taf1          | 11.283  | 12.1385  | 0.92952177  |
| Ap1s2         | 7.3945  | 7.956    | 0.929424334 |
| Klhl8         | 7.283   | 7.8365   | 0.929368978 |
| Fam167a       | 1.906   | 2.0515   | 0.929076286 |
| Kcnh2         | 8.9105  | 9.5915   | 0.928999635 |
| Prkg2         | 2.027   | 2.182    | 0.928964253 |
| Mapk1         | 50.87   | 54.76    | 0.928962747 |
| Mycbpap       | 1.628   | 1.7525   | 0.928958631 |
| Fam133b       | 16.37   | 17.6235  | 0.928873379 |
| Mrpl50        | 25.864  | 27.8495  | 0.928706081 |
| Jag2          | 3.06    | 3.2955   | 0.928538917 |
| Papd7         | 11.7815 | 12.692   | 0.928261897 |
| Camta2        | 46.6055 | 50.233   | 0.927786515 |
| Mtx1          | 11.3235 | 12.205   | 0.927775502 |
| 2410002O22Rik | 23.918  | 25.788   | 0.927485652 |
| Mtmr2         | 21.5425 | 23.2275  | 0.927456679 |
| Stxbp1        | 424.139 | 457.358  | 0.92736762  |
| Tmem167       | 3.87    | 4.1735   | 0.927279262 |
| Fam120b       | 33.1395 | 35.748   | 0.927030883 |
| Tmem185b      | 3.842   | 4.1445   | 0.927011702 |
| Mpped2        | 12.9195 | 13.939   | 0.92685989  |
| Apoo          | 43.5245 | 46.97    | 0.926644667 |
| Fkbp4         | 97.3775 | 105.1025 | 0.926500321 |
| Arl8a         | 127.457 | 137.6505 | 0.925946509 |
| H13           | 15.6665 | 16.9205  | 0.925888715 |
| Ube3c         | 11.047  | 11.935   | 0.925596984 |
| Fbxo9         | 41.579  | 44.926   | 0.925499711 |
| Cradd         | 28.5775 | 30.892   | 0.92507769  |
| Exoc1         | 19.4025 | 20.9745  | 0.925051849 |
| Arglu1        | 42.5935 | 46.048   | 0.924980455 |
| Zfp292        | 9.525   | 10.2995  | 0.924802175 |
| Nolc1         | 25.654  | 27.74    | 0.92480173  |
| Cryz          | 8.8525  | 9.5725   | 0.924784539 |
| Fastkd3       | 5.217   | 5.642    | 0.924672102 |
| Pmpcb         | 27.6425 | 29.8945  | 0.924668417 |
| Dtx1          | 21.4245 | 23.1715  | 0.924605658 |
| Slc25a5       | 146.339 | 158.282  | 0.924546063 |
| Ints12        | 8.718   | 9.4315   | 0.924349255 |
| Rpa1          | 9.402   | 10.1735  | 0.924165725 |
| Mapk8ip1      | 46.117  | 49.9135  | 0.923938413 |
| Zfp462        | 19.277  | 20.8715  | 0.923603958 |
| Syt5          | 48.503  | 52.524   | 0.923444521 |
| Mark3         | 15.111  | 16.3655  | 0.923344841 |
| Kcnc4         | 21.007  | 22.7525  | 0.923283156 |
| Egr1          | 77.674  | 84.1305  | 0.923256132 |
| Gabra1        | 68.9885 | 74.7245  | 0.923238028 |
| Slc25a4       | 755.804 | 818.7555 | 0.923113188 |
| Ptges3        | 83.292  | 90.2345  | 0.923061578 |

|               |         |          |             |
|---------------|---------|----------|-------------|
| Cyb5          | 26.1285 | 28.3135  | 0.922828333 |
| Stxbp5l       | 16.833  | 18.2415  | 0.922785955 |
| Smarca5       | 11.9545 | 12.957   | 0.922628695 |
| Idh3a         | 67.507  | 73.191   | 0.922340178 |
| Vps8          | 5.812   | 6.3015   | 0.922320083 |
| Fdx1l         | 70.439  | 76.3735  | 0.922296346 |
| Chtf8         | 11.8775 | 12.8785  | 0.922273557 |
| Rps6ka2       | 14.674  | 15.911   | 0.922255044 |
| Lmln          | 2.6735  | 2.899    | 0.922214557 |
| Tgoln1        | 23.447  | 25.4345  | 0.921858106 |
| Rbm4b         | 13.5235 | 14.671   | 0.921784473 |
| Med17         | 4.1115  | 4.4605   | 0.92175765  |
| Smc6          | 10.0685 | 10.9255  | 0.921559654 |
| Vps13b        | 4.8455  | 5.258    | 0.921548117 |
| Tmx1          | 13.569  | 14.7255  | 0.921462769 |
| 1600002H07Rik | 2.503   | 2.719    | 0.920559029 |
| Set           | 64.6965 | 70.282   | 0.920527304 |
| Fam105b       | 4.6105  | 5.009    | 0.920443202 |
| Srpr          | 17.1365 | 18.618   | 0.920426469 |
| Epha4         | 11.935  | 12.967   | 0.920413357 |
| Grb2          | 45.0595 | 48.956   | 0.920408122 |
| Ube4b         | 54.064  | 58.757   | 0.920128666 |
| Patz1         | 9.252   | 10.0565  | 0.920001989 |
| Maged2        | 25.727  | 27.968   | 0.919872712 |
| Fbxo25        | 25.764  | 28.014   | 0.919683016 |
| Fbxo28        | 18.972  | 20.633   | 0.919497892 |
| Dhx29         | 8.259   | 8.9835   | 0.919352146 |
| Irf9          | 9.185   | 9.9915   | 0.919281389 |
| Syng3         | 47.5405 | 51.7275  | 0.919056595 |
| Nap1l1        | 70.0015 | 76.182   | 0.918871912 |
| Serinc1       | 57.171  | 62.2205  | 0.918845075 |
| Wdr77         | 12.408  | 13.505   | 0.918770826 |
| Zfp385a       | 39.52   | 43.0195  | 0.918653169 |
| Tars          | 7.36    | 8.012    | 0.918622067 |
| Slc24a3       | 49.912  | 54.3365  | 0.91857223  |
| Rrp15         | 6.7255  | 7.3225   | 0.918470468 |
| Myo7a         | 1.57    | 1.71     | 0.918128655 |
| Tmed3         | 5.036   | 5.4855   | 0.918056695 |
| Dopey2        | 12.1725 | 13.262   | 0.917847987 |
| Rab27a        | 11.2815 | 12.2945  | 0.917605433 |
| Nbn           | 3.394   | 3.699    | 0.917545283 |
| Zfyve28       | 2.2425  | 2.4445   | 0.917365514 |
| 1110034A24Rik | 3.6115  | 3.937    | 0.917322835 |
| Bbs4          | 25.118  | 27.3935  | 0.916932849 |
| Sv2a          | 97.3    | 106.1275 | 0.916821747 |
| Tmem191c      | 17.4535 | 19.048   | 0.916290424 |
| Zfp57         | 4.7815  | 5.219    | 0.91617168  |
| Nrp2          | 18.887  | 20.6175  | 0.916066448 |
| Chac1         | 10.274  | 11.216   | 0.916012839 |
| Prkcc         | 26.3865 | 28.8135  | 0.91576865  |
| Csnk1e        | 35.7765 | 39.074   | 0.915608845 |
| Zfp236        | 6.631   | 7.243    | 0.915504625 |
| Rab43         | 5.908   | 6.4535   | 0.915472224 |
| Bcl6          | 14.4955 | 15.834   | 0.915466717 |
| Eif2b4        | 5.0685  | 5.537    | 0.915387394 |

|               |          |          |             |
|---------------|----------|----------|-------------|
| Krt222        | 20.14    | 22.003   | 0.915329728 |
| Ii13ra1       | 1.2905   | 1.41     | 0.915248227 |
| Alg2          | 111.423  | 121.7455 | 0.915212472 |
| Ppp1r7        | 26.4515  | 28.9095  | 0.914976046 |
| Amigo2        | 8.2135   | 8.977    | 0.914949315 |
| Lonrf2        | 89.281   | 97.591   | 0.914848705 |
| Hspa4l        | 37.2585  | 40.729   | 0.914790444 |
| Gp1bb         | 1.073    | 1.173    | 0.914748508 |
| Zfp93         | 3.4635   | 3.7865   | 0.91469695  |
| Anapc2        | 12.406   | 13.565   | 0.914559528 |
| P4ha1         | 4.677    | 5.1155   | 0.914280129 |
| Dnajc12       | 18.4175  | 20.1465  | 0.914178641 |
| Gng2          | 184.7505 | 202.096  | 0.914171978 |
| Slc2a1        | 13.226   | 14.468   | 0.914155377 |
| 5430405G05Rik | 2.0815   | 2.278    | 0.913740123 |
| Spdya         | 2.319    | 2.538    | 0.913711584 |
| Grik4         | 2.7255   | 2.9835   | 0.913524384 |
| Asb3          | 3.533    | 3.8675   | 0.913510019 |
| Kin           | 14.263   | 15.615   | 0.913416587 |
| Galnt14       | 2.228    | 2.4395   | 0.913301906 |
| Ift74         | 10.0415  | 10.997   | 0.913112667 |
| Hps3          | 3.683    | 4.036    | 0.912537166 |
| Hnrnpk        | 156.892  | 171.9755 | 0.912292739 |
| Etfp          | 23.723   | 26.0235  | 0.911599132 |
| Pafah2        | 1.8265   | 2.004    | 0.911427146 |
| Zfp14         | 3.6135   | 3.965    | 0.911349306 |
| Faim2         | 112.623  | 123.5875 | 0.911281481 |
| Gzf1          | 11.9925  | 13.161   | 0.911214953 |
| Garnl3        | 15.8365  | 17.383   | 0.911033769 |
| Gng5          | 18.6     | 20.417   | 0.911005535 |
| Trap1         | 14.802   | 16.2485  | 0.910976398 |
| Dnaja2        | 56.028   | 61.5115  | 0.910854068 |
| Zc4h2         | 8.605    | 9.448    | 0.910774767 |
| Plod3         | 2.864    | 3.1455   | 0.910507074 |
| Hivep1        | 18.9405  | 20.809   | 0.910207122 |
| Tcp1          | 77.6305  | 85.291   | 0.910183958 |
| 1110059G10Rik | 4.1955   | 4.61     | 0.910086768 |
| Rpain         | 6.9555   | 7.6445   | 0.909869841 |
| Dtwd2         | 2.4125   | 2.6515   | 0.909862342 |
| Zscan21       | 6.9745   | 7.6665   | 0.909737168 |
| Tfg           | 99.013   | 108.9005 | 0.90920611  |
| Ngrn          | 18.991   | 20.9075  | 0.90833433  |
| Pex1          | 6.716    | 7.3945   | 0.908242613 |
| Gusb          | 4.201    | 4.6255   | 0.908226138 |
| Glg1          | 33.461   | 36.8445  | 0.908168112 |
| Tubgcp6       | 3.8175   | 4.204    | 0.908063749 |
| Leng9         | 2.133    | 2.349    | 0.908045977 |
| Pex7          | 8.462    | 9.319    | 0.908037343 |
| Taok3         | 48.885   | 53.8365  | 0.908027082 |
| Celf5         | 43.9675  | 48.421   | 0.908025444 |
| Zdhhc14       | 5.3745   | 5.919    | 0.908008109 |
| Zfp687        | 6.96     | 7.666    | 0.907905035 |
| Ccnh          | 10.3725  | 11.425   | 0.907877462 |
| Uggt1         | 5.5175   | 6.0775   | 0.907856849 |
| Pdcd2         | 13.848   | 15.2555  | 0.907738193 |

|               |          |          |             |
|---------------|----------|----------|-------------|
| Zkscan3       | 2.887    | 3.1805   | 0.907718912 |
| Matr3         | 27.281   | 30.0555  | 0.907687445 |
| Mki67ip       | 9.485    | 10.4505  | 0.907612076 |
| Dhx32         | 7.318    | 8.063    | 0.907602629 |
| Dctn4         | 53.123   | 58.5325  | 0.907581258 |
| Slbp          | 20.1245  | 22.175   | 0.907531003 |
| Mrpl16        | 43.2125  | 47.6345  | 0.907168124 |
| Eapp          | 12.5755  | 13.8645  | 0.907028742 |
| Cd302         | 2.078    | 2.291    | 0.907027499 |
| Cep350        | 5.4605   | 6.0205   | 0.90698447  |
| Mest          | 29.557   | 32.59    | 0.906934643 |
| Selk          | 50.5405  | 55.7295  | 0.906889529 |
| B3gat2        | 10.3465  | 11.4095  | 0.906832026 |
| Dst           | 20.912   | 23.062   | 0.906773047 |
| Limk2         | 13.2785  | 14.6465  | 0.906598846 |
| Stk11         | 13.376   | 14.7655  | 0.9058955   |
| Ppp2r5d       | 27.7735  | 30.66    | 0.905854534 |
| Rps29         | 329.858  | 364.1585 | 0.905808872 |
| Taf5l         | 5.206    | 5.7475   | 0.905785124 |
| Slc35a1       | 5.6925   | 6.2855   | 0.905655875 |
| Sqle          | 23.2145  | 25.639   | 0.90543703  |
| A830018L16Rik | 10.1605  | 11.222   | 0.905409018 |
| Gtf3c5        | 7.334    | 8.1005   | 0.905376211 |
| Mtmr4         | 11.1455  | 12.312   | 0.905255036 |
| Syt13         | 32.695   | 36.1195  | 0.905189717 |
| Gpr22         | 4.8315   | 5.3385   | 0.905029503 |
| Dync2h1       | 3.782    | 4.179    | 0.905001196 |
| Tex10         | 7.046    | 7.786    | 0.904957616 |
| Prmt1         | 62.447   | 69.0085  | 0.90491751  |
| Gm5265        | 1.1985   | 1.3245   | 0.904869762 |
| Gas8          | 7.946    | 8.7845   | 0.904547783 |
| Mad11l        | 2.2075   | 2.441    | 0.904342483 |
| D8Ertd82e     | 7.4575   | 8.249    | 0.904048976 |
| Nom1          | 7.912    | 8.7525   | 0.903970294 |
| Reps1         | 28.816   | 31.8835  | 0.903790362 |
| Coro6         | 3.0385   | 3.3625   | 0.903643123 |
| Rnf12l        | 3.4165   | 3.7815   | 0.903477456 |
| Cds1          | 8.793    | 9.733    | 0.90342135  |
| Amz1          | 2.1385   | 2.3675   | 0.903273495 |
| Gira2         | 20.014   | 22.1575  | 0.903260747 |
| Arrb2         | 18.25    | 20.205   | 0.903241772 |
| Ghitm         | 122.1405 | 135.28   | 0.902871821 |
| Ptpn23        | 9.388    | 10.398   | 0.902865936 |
| Thrb          | 6.232    | 6.9025   | 0.902861282 |
| Zim1          | 11.016   | 12.203   | 0.902728837 |
| Jdp2          | 8.231    | 9.1185   | 0.902670395 |
| C230081A13Rik | 6.1255   | 6.786    | 0.902667256 |
| Tdp2          | 4.221    | 4.6765   | 0.902598097 |
| Alcam         | 30.583   | 33.8855  | 0.902539434 |
| Ncoa4         | 25.536   | 28.297   | 0.902427819 |
| Frmpd4        | 16.85    | 18.679   | 0.902082553 |
| Cox7a2l       | 186.5975 | 206.868  | 0.902012394 |
| Slc5a3        | 6.6515   | 7.375    | 0.901898305 |
| Taf8          | 2.248    | 2.493    | 0.90172483  |
| Igbp1         | 17.6365  | 19.559   | 0.901707654 |



|               |         |          |             |
|---------------|---------|----------|-------------|
| Gabra3        | 13.5525 | 15.0305  | 0.901666611 |
| Tm9sf4        | 18.9595 | 21.0275  | 0.901652598 |
| Pex5          | 5.642   | 6.2585   | 0.901493968 |
| Gabbr2        | 32.084  | 35.591   | 0.901463853 |
| Abat          | 99.6985 | 110.6225 | 0.901249746 |
| Snx8          | 10.535  | 11.6895  | 0.901236152 |
| Nek6          | 7.8815  | 8.7485   | 0.900897297 |
| Tfip11        | 8.3125  | 9.2285   | 0.900742266 |
| Elavl1        | 25.9935 | 28.8645  | 0.90053526  |
| Sipa1         | 2.317   | 2.573    | 0.900505247 |
| Sh3rf3        | 7.26    | 8.063    | 0.900409277 |
| Fam13a        | 5.6025  | 6.2225   | 0.900361591 |
| 2610034B18Rik | 6.806   | 7.56     | 0.90026455  |
| Rnf103        | 9.768   | 10.851   | 0.900193531 |
| Robo1         | 13.533  | 15.0345  | 0.900129702 |
| Xylb          | 3.2935  | 3.659    | 0.900109319 |
| Bfar          | 8.242   | 9.157    | 0.900076444 |
| Slc38a9       | 3.454   | 3.838    | 0.89994789  |
| Wdr41         | 12.837  | 14.266   | 0.899831768 |
| Plk5          | 1.171   | 1.3015   | 0.89973108  |
| Cept1         | 2.2115  | 2.458    | 0.899715216 |
| Rbm3          | 68.121  | 75.7325  | 0.899494933 |
| Rerg          | 6.877   | 7.6455   | 0.899483356 |
| Syngap1       | 36.4805 | 40.57    | 0.899198915 |
| Ezh1          | 18.628  | 20.717   | 0.899164937 |
| Rimkla        | 8.338   | 9.274    | 0.899072676 |
| Psm11         | 53.1055 | 59.0675  | 0.899064629 |
| Akap6         | 25.225  | 28.0575  | 0.899046601 |
| Slc4a8        | 14.8365 | 16.5045  | 0.898936654 |
| Commd7        | 10.029  | 11.16    | 0.898655914 |
| Lpin1         | 8.02    | 8.926    | 0.898498768 |
| 6330403A02Rik | 16.147  | 17.9725  | 0.898428154 |
| Zfp184        | 1.496   | 1.6655   | 0.89822876  |
| Prepl         | 283.027 | 315.1185 | 0.898160533 |
| Dhx35         | 2.7595  | 3.0725   | 0.89812856  |
| Spes2         | 18.0865 | 20.141   | 0.897994141 |
| Ptpn2         | 46.271  | 51.538   | 0.897803562 |
| Tbc1d19       | 11.908  | 13.268   | 0.897497739 |
| Rgs19         | 21.072  | 23.484   | 0.897291773 |
| Cct5          | 73.9635 | 82.4315  | 0.897272281 |
| 2810422J05Rik | 18.4445 | 20.5575  | 0.897215128 |
| Fgfr1         | 10.1795 | 11.346   | 0.897188436 |
| Acadsl        | 26.931  | 30.019   | 0.897131817 |
| Sf3b2         | 62.087  | 69.2195  | 0.896958227 |
| Pard3         | 5.553   | 6.191    | 0.896947181 |
| LOC100503038  | 3.1475  | 3.5095   | 0.896851403 |
| Plrg1         | 16.3085 | 18.186   | 0.896761245 |
| Aaas          | 6.579   | 7.3365   | 0.896749131 |
| 5033414D02Rik | 14.0845 | 15.7065  | 0.896730653 |
| Fam158a       | 22.398  | 24.983   | 0.89652964  |
| Lrrc61        | 21.045  | 23.477   | 0.896409252 |
| Zfyve9        | 6.3385  | 7.071    | 0.896407863 |
| 2400001E08Rik | 33.263  | 37.1075  | 0.896395607 |
| 6330577E15Rik | 50.6505 | 56.5065  | 0.896365905 |
| Tfam          | 10.984  | 12.2555  | 0.896250663 |

|               |          |          |             |
|---------------|----------|----------|-------------|
| Mpp1          | 22.4825  | 25.089   | 0.896109849 |
| Mttp          | 2.267    | 2.53     | 0.896047431 |
| Atxn2         | 70.2145  | 78.3675  | 0.895964526 |
| Raf1          | 9.518    | 10.624   | 0.895896084 |
| Ddx46         | 19.3945  | 21.661   | 0.895364942 |
| Alkbh2        | 2.452    | 2.7395   | 0.895053842 |
| Synj1         | 130.1555 | 145.4565 | 0.894807039 |
| B230315N10Rik | 6.129    | 6.85     | 0.894744526 |
| Tspan6        | 7.214    | 8.063    | 0.894704204 |
| Pknox1        | 3.517    | 3.9315   | 0.894569503 |
| Mypop         | 5.625    | 6.2915   | 0.894063419 |
| Impa1         | 10.839   | 12.1245  | 0.893975009 |
| Dnm3          | 73.4455  | 82.179   | 0.893725891 |
| Rad1          | 7.091    | 7.936    | 0.893523185 |
| Tpm3          | 48.4355  | 54.215   | 0.893396661 |
| Top1          | 27.81    | 31.1365  | 0.893163972 |
| Ttc7b         | 61.682   | 69.0625  | 0.893133032 |
| Fndc4         | 5.38     | 6.024    | 0.89309429  |
| Aup1          | 9.895    | 11.0805  | 0.893010243 |
| Zdhhc5        | 9.9705   | 11.1705  | 0.892574191 |
| Dhrs13        | 2.4915   | 2.7915   | 0.892530897 |
| Mta3          | 51.194   | 57.3645  | 0.892433474 |
| Zfp108        | 3.0725   | 3.443    | 0.892390357 |
| Gpr64         | 1.459    | 1.635    | 0.89235474  |
| Mmgt2         | 3.607    | 4.0425   | 0.892269635 |
| Psmc1         | 92.804   | 104.0105 | 0.89225607  |
| Atrx          | 13.415   | 15.037   | 0.892132739 |
| Paox          | 2.112    | 2.3675   | 0.892080253 |
| Hes1          | 1.143    | 1.2815   | 0.891923527 |
| Tln2          | 8.571    | 9.6105   | 0.891837053 |
| Smarcc1       | 24.287   | 27.233   | 0.891822421 |
| Rfx5          | 8.507    | 9.539    | 0.891812559 |
| Scpep1        | 8.5965   | 9.6395   | 0.891799367 |
| Trmt1         | 5.34     | 5.9895   | 0.89156023  |
| Atp1b1        | 661.965  | 742.6125 | 0.891400293 |
| Ctsf          | 6.9535   | 7.801    | 0.891360082 |
| Ube2d2        | 37.037   | 41.5625  | 0.891115789 |
| Vhl           | 6.3085   | 7.0805   | 0.890968152 |
| Ap2b1         | 36.74    | 41.238   | 0.890925845 |
| Mtf1          | 9.634    | 10.814   | 0.89088219  |
| Pitpna        | 115.7285 | 129.9045 | 0.89087368  |
| Gin1          | 3.2895   | 3.694    | 0.890498105 |
| Pou6f1        | 11.134   | 12.505   | 0.890363854 |
| Tmem200a      | 3.7875   | 4.255    | 0.89012926  |
| Fance         | 5.0035   | 5.622    | 0.88998577  |
| Zfp444        | 4.4445   | 4.9955   | 0.889700731 |
| Rprd1a        | 23.916   | 26.882   | 0.889665947 |
| Tmem216       | 10.102   | 11.355   | 0.889652136 |
| Prlr          | 8.579    | 9.6435   | 0.889614766 |
| Bin3          | 2.1135   | 2.376    | 0.889520202 |
| Arf4          | 110.7275 | 124.4875 | 0.889466814 |
| Dgkk          | 29.5145  | 33.1905  | 0.889245417 |
| BC005764      | 10.6425  | 11.9705  | 0.889060607 |
| Rsrc1         | 14.8065  | 16.6545  | 0.889038998 |
| Slc35b4       | 10.517   | 11.8305  | 0.888973416 |

|               |          |          |             |
|---------------|----------|----------|-------------|
| 1500031L02Rik | 24.6645  | 27.7605  | 0.888474631 |
| Psmc4         | 40.0755  | 45.1265  | 0.888070203 |
| Ruvbl2        | 23.499   | 26.4635  | 0.887977781 |
| Gpr50         | 5.1795   | 5.833    | 0.887965027 |
| Galnt9        | 4.3985   | 4.9535   | 0.887958009 |
| Zhx1          | 18.064   | 20.3485  | 0.887731282 |
| Rasgef1b      | 10.537   | 11.8705  | 0.887662693 |
| Scn2a1        | 27.327   | 30.789   | 0.887557244 |
| 2810405K02Rik | 43.0145  | 48.47    | 0.887445843 |
| Cramp1l       | 12.286   | 13.8465  | 0.88730004  |
| Bag2          | 8.0395   | 9.062    | 0.887166188 |
| Rfc1          | 6.8675   | 7.7425   | 0.886987407 |
| Pelp1         | 5.118    | 5.771    | 0.886848033 |
| Azin1         | 8.739    | 9.854    | 0.886847981 |
| Uchl5         | 23.6815  | 26.708   | 0.886681893 |
| Cdk5r2        | 43.9585  | 49.585   | 0.886528184 |
| Ppid          | 27.133   | 30.6125  | 0.886337281 |
| Anp32b        | 61.576   | 69.4755  | 0.886298048 |
| Tle3          | 3.941    | 4.447    | 0.886215426 |
| 2700094K13Rik | 31.8485  | 35.9445  | 0.886046544 |
| Nln           | 7.358    | 8.308    | 0.885652383 |
| Hopx          | 7.9445   | 8.9715   | 0.885526389 |
| Zfp112        | 2.4945   | 2.817    | 0.885516507 |
| Npas4         | 1.816    | 2.051    | 0.885421745 |
| Cct2          | 89.219   | 100.7685 | 0.88538581  |
| Zdhhc9        | 12.503   | 14.1225  | 0.885324836 |
| Gm1568        | 2.86     | 3.2305   | 0.885311871 |
| Cdk13         | 12.427   | 14.0375  | 0.885271594 |
| LOC100503302  | 41.5975  | 46.989   | 0.88526038  |
| Hnrnpc        | 45.2315  | 51.0945  | 0.885251837 |
| 2610002I17Rik | 7.6675   | 8.6615   | 0.885239277 |
| Atg4a         | 1.0255   | 1.1585   | 0.885196375 |
| Cacna1h       | 2.0415   | 2.3065   | 0.885107305 |
| Cep68         | 4.8825   | 5.517    | 0.884991843 |
| Pxk           | 15.375   | 17.374   | 0.884943018 |
| Bcap29        | 4.508    | 5.0945   | 0.884875847 |
| Gnb21l        | 70.4815  | 79.6715  | 0.88465135  |
| Dmwd          | 29.657   | 33.526   | 0.884597029 |
| Pgk1          | 138.7625 | 156.9185 | 0.884296625 |
| Pi4kb         | 8.4095   | 9.5105   | 0.884233216 |
| Aarsd1        | 29.644   | 33.5275  | 0.884169711 |
| Rad23a        | 35.132   | 39.745   | 0.883935086 |
| Dnajc13       | 6.4295   | 7.2745   | 0.883840814 |
| BC023814      | 6.349    | 7.184    | 0.883769488 |
| Hsd1l         | 13.476   | 15.249   | 0.883730081 |
| Rsph1         | 5.2095   | 5.896    | 0.883565129 |
| Pgr15l        | 2.15     | 2.4335   | 0.88350113  |
| Tmem19        | 4.235    | 4.7935   | 0.883488057 |
| Rpia          | 4.2      | 4.7545   | 0.883373646 |
| Pdxk          | 80.1645  | 90.772   | 0.883141277 |
| Lck           | 1.2275   | 1.39     | 0.883093525 |
| Bckdha        | 2.685    | 3.0405   | 0.883078441 |
| Zfp318        | 11.584   | 13.1235  | 0.882691355 |
| Odf2          | 9.96     | 11.2885  | 0.882313859 |
| Cyhr1         | 29.269   | 33.179   | 0.882154375 |

|               |         |          |             |
|---------------|---------|----------|-------------|
| 9030409G11Rik | 92.514  | 104.8815 | 0.882081206 |
| Ruvbl1        | 21.55   | 24.431   | 0.882076051 |
| Cgrrf1        | 10.01   | 11.3485  | 0.882054897 |
| Epc1          | 25.28   | 28.6615  | 0.882019434 |
| Tbcc          | 5.7895  | 6.5665   | 0.881672124 |
| Hsf4          | 4.5935  | 5.21     | 0.881669866 |
| Nudcd1        | 3.5965  | 4.0795   | 0.881603138 |
| Gng7          | 19.164  | 21.738   | 0.881589843 |
| Cables2       | 14.0045 | 15.886   | 0.881562382 |
| Zhx2          | 10.4575 | 11.8625  | 0.881559536 |
| Man2b2        | 5.0625  | 5.7465   | 0.880971026 |
| Zfp189        | 4.2295  | 4.801    | 0.8809623   |
| Kat2a         | 39.5025 | 44.875   | 0.880278552 |
| Tmem175       | 5.484   | 6.23     | 0.880256822 |
| Wdr54         | 9.3825  | 10.66    | 0.880159475 |
| Fbxl15        | 6.645   | 7.5505   | 0.880074167 |
| Trpc4ap       | 22.2125 | 25.2415  | 0.879999208 |
| Stard3nl      | 21.8065 | 24.7805  | 0.87998628  |
| Gpx4          | 61.5915 | 70.0075  | 0.879784309 |
| Fydd1         | 23.596  | 26.8245  | 0.879643609 |
| Prps1         | 27.4875 | 31.2495  | 0.879614074 |
| Spata24       | 2.7955  | 3.1795   | 0.879226293 |
| Sucla2        | 30.0655 | 34.2005  | 0.879095335 |
| Slc3a2        | 11.2485 | 12.7975  | 0.878960735 |
| Cdc25a        | 1.7885  | 2.035    | 0.878869779 |
| Eif2b2        | 20.1605 | 22.952   | 0.878376612 |
| Lancl1        | 21.33   | 24.285   | 0.878319951 |
| Myo9a         | 11.1645 | 12.7115  | 0.878299178 |
| Kend2         | 12.146  | 13.83    | 0.878235719 |
| Eif3c         | 58.062  | 66.1185  | 0.878150593 |
| Rprm          | 10.658  | 12.1385  | 0.878032706 |
| Armex1        | 25.9845 | 29.596   | 0.877973375 |
| Orc5l         | 3.135   | 3.5715   | 0.877782444 |
| Cep120        | 17.157  | 19.5465  | 0.87775305  |
| Zc3h11a       | 23.222  | 26.4575  | 0.877709534 |
| Gnal          | 59.6145 | 67.925   | 0.877651822 |
| Cul3          | 42.1105 | 47.981   | 0.877649486 |
| Hplbp3        | 87.978  | 100.2545 | 0.877546644 |
| Irak2         | 6.078   | 6.927    | 0.87743612  |
| Cntnap1       | 16.745  | 19.085   | 0.877390621 |
| Pabpn1        | 27.1785 | 30.979   | 0.87732012  |
| Wasl          | 43.689  | 49.8005  | 0.877280349 |
| Kank2         | 2.752   | 3.1375   | 0.877131474 |
| Eefsec        | 3.872   | 4.4145   | 0.877109525 |
| Hspb8         | 16.0855 | 18.342   | 0.876976338 |
| Osbpl6        | 19.0755 | 21.7575  | 0.876732161 |
| Slc35f4       | 4.0285  | 4.595    | 0.876713819 |
| Sfxn3         | 31.3065 | 35.712   | 0.876638105 |
| Pde4d         | 18.5575 | 21.172   | 0.87651143  |
| Nudt3         | 94.037  | 107.2905 | 0.87647089  |
| Arl8b         | 43.8595 | 50.0495  | 0.876322441 |
| Akt1s1        | 4.8175  | 5.4985   | 0.87614804  |
| Yy1           | 17.135  | 19.558   | 0.876112077 |
| Cpg1          | 28.2445 | 32.239   | 0.876097273 |
| Pde8b         | 21.489  | 24.533   | 0.875922227 |

|               |         |         |             |
|---------------|---------|---------|-------------|
| Adh5          | 19.988  | 22.8275 | 0.875610557 |
| Lzts1         | 1.79    | 2.0445  | 0.875519687 |
| Sbk1          | 4.3565  | 4.976   | 0.875502412 |
| Slmo2         | 81.942  | 93.5945 | 0.875500163 |
| 4930430F08Rik | 9.894   | 11.303  | 0.875342829 |
| Ubtf          | 10.737  | 12.27   | 0.875061125 |
| Zc3h4         | 15.9895 | 18.277  | 0.874842698 |
| Fam32a        | 42.7855 | 48.909  | 0.874798094 |
| Keap1         | 6.5605  | 7.5005  | 0.874675022 |
| Nqo2          | 1.69    | 1.9325  | 0.874514877 |
| Tkt           | 16.426  | 18.7855 | 0.874397807 |
| Zfp583        | 1.789   | 2.046   | 0.874389052 |
| Ap1m1         | 16.324  | 18.67   | 0.874343867 |
| AI314180      | 15.5315 | 17.765  | 0.87427526  |
| Nptn          | 57.094  | 65.3185 | 0.874086208 |
| Mterfd1       | 11.9105 | 13.627  | 0.874036839 |
| Trim23        | 13.1885 | 15.0895 | 0.874018357 |
| Gimap1        | 7.5     | 8.5825  | 0.87387125  |
| Gm5494        | 1.2505  | 1.431   | 0.87386443  |
| Efnb3         | 26.1585 | 29.94   | 0.873697395 |
| Ascc2         | 4.949   | 5.6645  | 0.873686998 |
| Hgs           | 11.722  | 13.417  | 0.873667735 |
| Srgap3        | 64.003  | 73.26   | 0.873641824 |
| 9130023H24Rik | 1.157   | 1.3245  | 0.873537184 |
| Wdr37         | 32.951  | 37.7335 | 0.87325586  |
| Ddx58         | 4.4055  | 5.046   | 0.873067776 |
| Pnpo          | 18.1335 | 20.7735 | 0.872915012 |
| Gba2          | 6.143   | 7.0375  | 0.872895204 |
| Cacna1d       | 3.404   | 3.9005  | 0.872708627 |
| Tceal1        | 30.6095 | 35.079  | 0.872587588 |
| D230025D16Rik | 26.984  | 30.9275 | 0.872492119 |
| Pmpca         | 19.818  | 22.718  | 0.872347918 |
| Arhgap24      | 9.225   | 10.576  | 0.872257943 |
| Kpna3         | 19.904  | 22.8235 | 0.872083598 |
| Prkcb         | 30.4165 | 34.8805 | 0.872020183 |
| Hcn1          | 13.9565 | 16.006  | 0.871954267 |
| Wbp4          | 22.063  | 25.3035 | 0.871934713 |
| Vps37c        | 11.2575 | 12.911  | 0.871930912 |
| Asf1a         | 5.903   | 6.771   | 0.871806232 |
| Cdh2          | 29.9075 | 34.306  | 0.871786276 |
| Plcg1         | 6.706   | 7.693   | 0.871701547 |
| Usp47         | 12.857  | 14.7495 | 0.871690566 |
| Atp2b2        | 61.214  | 70.232  | 0.871596993 |
| Dpysl2        | 229.412 | 263.217 | 0.871569845 |
| Ttc1          | 48.535  | 55.6975 | 0.871403564 |
| Oprl1         | 11.9735 | 13.7405 | 0.87140206  |
| Zfp2          | 6.0035  | 6.892   | 0.871082414 |
| Rnasen        | 29.196  | 33.519  | 0.871028372 |
| Igsf10        | 3.125   | 3.588   | 0.870958751 |
| D030056L22Rik | 5.005   | 5.7475  | 0.870813397 |
| Ap3m1         | 7.3015  | 8.385   | 0.870781157 |
| Arnt          | 6.221   | 7.1445  | 0.87073973  |
| LOC100502841  | 6.1145  | 7.0235  | 0.870577347 |
| Vbp1          | 22.9395 | 26.3625 | 0.870156472 |
| Tmem208       | 11.605  | 13.3385 | 0.87003786  |

|               |         |         |             |
|---------------|---------|---------|-------------|
| Jph1          | 4.002   | 4.6     | 0.87        |
| Sec23a        | 24.5445 | 28.2125 | 0.869986708 |
| Dscam         | 17.9835 | 20.673  | 0.869902772 |
| Psm1          | 45.6955 | 52.5325 | 0.869851996 |
| Slc19a1       | 2.379   | 2.7355  | 0.869676476 |
| Cse1l         | 10.448  | 12.0155 | 0.869543506 |
| Zfp575        | 7.969   | 9.1655  | 0.869456113 |
| Zfc3h1        | 6.697   | 7.7045  | 0.869232267 |
| Lace1         | 3.7335  | 4.2965  | 0.86896311  |
| Esrrg         | 14.1795 | 16.3255 | 0.868549202 |
| Rab3gap1      | 8.2425  | 9.493   | 0.868271358 |
| Serpinb8      | 2.537   | 2.922   | 0.868240931 |
| Nhs           | 5.3645  | 6.179   | 0.868182554 |
| 1520402A15Rik | 4.563   | 5.256   | 0.868150685 |
| Sbf1          | 10.762  | 12.397  | 0.868113253 |
| Cacna2d2      | 34.8415 | 40.1415 | 0.867967067 |
| Rfc4          | 1.7625  | 2.031   | 0.867799114 |
| Ndor1         | 3.6955  | 4.2585  | 0.867793824 |
| Trim66        | 16.8235 | 19.3915 | 0.867570843 |
| Rbpms         | 2.0395  | 2.351   | 0.86750319  |
| Gpr149        | 2.919   | 3.365   | 0.867459138 |
| Agtpbp1       | 51.741  | 59.651  | 0.86739535  |
| Ndn12         | 4.986   | 5.75    | 0.867130435 |
| N4bp2l2       | 4.548   | 5.2475  | 0.866698428 |
| Zfp457        | 1.8705  | 2.1585  | 0.86657401  |
| Deaf12        | 13.9585 | 16.108  | 0.86655699  |
| Mtmr7         | 19.3645 | 22.3475 | 0.866517508 |
| Bckdhb        | 12.308  | 14.207  | 0.866333498 |
| Serinc3       | 43.066  | 49.715  | 0.866257669 |
| Kend3         | 12.1685 | 14.048  | 0.866208713 |
| Phtf1         | 7.076   | 8.1715  | 0.865936487 |
| Shkbp1        | 1.3075  | 1.51    | 0.86589404  |
| Cyp7b1        | 1.27    | 1.467   | 0.865712338 |
| BC068157      | 34.15   | 39.448  | 0.865696613 |
| Yipf3         | 14.1225 | 16.314  | 0.865667525 |
| Srpkl         | 29.6075 | 34.2075 | 0.865526566 |
| Clybl         | 14.433  | 16.6765 | 0.865469373 |
| Hmgn5         | 14.0235 | 16.2035 | 0.865461166 |
| Crmp1         | 38.404  | 44.3935 | 0.8650816   |
| Wbp7          | 4.5805  | 5.295   | 0.865061379 |
| Mgrn1         | 42.82   | 49.5035 | 0.864989344 |
| Agfg1         | 13.288  | 15.3625 | 0.864963385 |
| Srsf6         | 15.033  | 17.3805 | 0.864934841 |
| Dcxr          | 2.019   | 2.3345  | 0.864853288 |
| Brsk2         | 20.955  | 24.2335 | 0.864712072 |
| Rad9          | 7.871   | 9.1025  | 0.864707498 |
| Cobl          | 13.466  | 15.578  | 0.864424188 |
| 2610101N10Rik | 12.6745 | 14.665  | 0.864268667 |
| Lrp11         | 13.8655 | 16.044  | 0.864217153 |
| Cyb5b         | 33.166  | 38.378  | 0.864193027 |
| Gsn           | 3.63    | 4.2005  | 0.864182835 |
| Pdhh          | 81.4575 | 94.265  | 0.864133029 |
| C130022K22Rik | 18.7745 | 21.7265 | 0.864129059 |
| Tbcel         | 9.524   | 11.023  | 0.864011612 |
| Zfp740        | 6.3405  | 7.3385  | 0.864004906 |

|               |          |          |             |
|---------------|----------|----------|-------------|
| Mettl14       | 10.762   | 12.459   | 0.863793242 |
| Tspan33       | 6.867    | 7.9505   | 0.863719263 |
| Gkap1         | 13.997   | 16.2075  | 0.863612525 |
| 2310047B19Rik | 5.2      | 6.0215   | 0.8635722   |
| Faf2          | 6.5665   | 7.6045   | 0.863501874 |
| Ppp2r5e       | 16.1955  | 18.7705  | 0.862816654 |
| Sipa1l1       | 30.303   | 35.1245  | 0.862731142 |
| Ppp4r1        | 3.7255   | 4.319    | 0.862583931 |
| Galk1         | 4.3635   | 5.0605   | 0.862266574 |
| Slc25a28      | 16.485   | 19.119   | 0.862231288 |
| 1700034H14Rik | 2.7575   | 3.1985   | 0.86212287  |
| 6530401D17Rik | 12.0615  | 13.9905  | 0.862120725 |
| Lypla2        | 8.8605   | 10.278   | 0.862084063 |
| Prpf4b        | 14.3515  | 16.6485  | 0.862029612 |
| Sfxn1         | 37.612   | 43.6415  | 0.861840221 |
| Mrto4         | 16.8215  | 19.52    | 0.861757172 |
| Rundc3b       | 13.215   | 15.3365  | 0.861669873 |
| Rac1          | 422.006  | 489.7945 | 0.861598078 |
| Zfhx4         | 20.5145  | 23.81    | 0.861591768 |
| Bbs5          | 5.428    | 6.3005   | 0.861518927 |
| Grm5          | 12.109   | 14.0555  | 0.861513287 |
| Arhgap32      | 26.3575  | 30.595   | 0.861496977 |
| Gdi1          | 660.1735 | 766.498  | 0.861285352 |
| Vezt          | 7.45     | 8.6515   | 0.861122349 |
| Sec16a        | 15.3835  | 17.8645  | 0.861121218 |
| Rps19         | 110.9965 | 128.8995 | 0.861108848 |
| A830080D01Rik | 2.513    | 2.9185   | 0.861058763 |
| Adnp2         | 6.4245   | 7.4625   | 0.860904523 |
| Gstt1         | 6.95     | 8.073    | 0.860894339 |
| Pcdh11x       | 8.7585   | 10.1745  | 0.860828542 |
| Coq2          | 12.347   | 14.3435  | 0.860808032 |
| Nlgn1         | 11.277   | 13.102   | 0.860708289 |
| Ddc           | 12.7925  | 14.863   | 0.860694342 |
| Tra2b         | 26.3465  | 30.6155  | 0.860560827 |
| Ppp2r5c       | 44.779   | 52.037   | 0.860522321 |
| Zfp781        | 6.39     | 7.426    | 0.86049017  |
| Zc3h7a        | 4.594    | 5.339    | 0.86046076  |
| Ragef5        | 6.9735   | 8.107    | 0.860182558 |
| Snx1          | 28.647   | 33.309   | 0.860037828 |
| Idh1          | 13.101   | 15.236   | 0.859871357 |
| Abcg1         | 8.9155   | 10.371   | 0.859656735 |
| Fam5c         | 10.552   | 12.2775  | 0.859458359 |
| Wnt2b         | 2.981    | 3.469    | 0.859325454 |
| Uck2          | 9.318    | 10.844   | 0.85927702  |
| Tmem68        | 4.512    | 5.252    | 0.859101295 |
| Hey1          | 33.103   | 38.541   | 0.858903505 |
| Astn1         | 24.901   | 28.9955  | 0.858788433 |
| Secisbp2      | 4.111    | 4.787    | 0.858784207 |
| Ppp1r2        | 31.06    | 36.1675  | 0.858782056 |
| Gps2          | 17.261   | 20.1015  | 0.858692137 |
| Serpinb9      | 2.4185   | 2.8165   | 0.858689863 |
| 9530068E07Rik | 37.371   | 43.525   | 0.858609994 |
| Kif5a         | 129.719  | 151.1095 | 0.858443711 |
| Eml4          | 5.693    | 6.632    | 0.858413752 |
| Tgds          | 2.024    | 2.3585   | 0.858172567 |

|               |          |          |             |
|---------------|----------|----------|-------------|
| Cd24a         | 11.563   | 13.478   | 0.857916605 |
| Fryl          | 7.8125   | 9.107    | 0.857856594 |
| Magi1         | 30.825   | 35.9345  | 0.857810739 |
| Bptf          | 21.9205  | 25.5585  | 0.857659878 |
| Slco3a1       | 12.8755  | 15.0125  | 0.857651957 |
| Mbd5          | 24.612   | 28.697   | 0.857650626 |
| Nap1l2        | 26.907   | 31.3895  | 0.85719747  |
| Osbp          | 9.8525   | 11.494   | 0.857186358 |
| Pnma1         | 2.703    | 3.1535   | 0.857142857 |
| Homez         | 2.6005   | 3.034    | 0.857119314 |
| Tbc1d9b       | 22.129   | 25.821   | 0.857015607 |
| Zfhx3         | 38.0765  | 44.4315  | 0.856970843 |
| Pcsk1         | 3.7905   | 4.4235   | 0.856900644 |
| Dnajc6        | 60.8235  | 70.9845  | 0.856856074 |
| Flot2         | 19.843   | 23.161   | 0.856741937 |
| Srsf4         | 27.3175  | 31.8885  | 0.856656788 |
| Adra1b        | 3.7785   | 4.411    | 0.856608479 |
| Polr3e        | 6.0435   | 7.058    | 0.856262397 |
| Fam196b       | 7.3125   | 8.5405   | 0.856214507 |
| Per1          | 11.982   | 13.996   | 0.856101743 |
| Cnot3         | 21.0005  | 24.5335  | 0.855992826 |
| Ptpm          | 11.673   | 13.638   | 0.85591729  |
| BC031441      | 1.1415   | 1.334    | 0.855697151 |
| Cited1        | 11.506   | 13.4505  | 0.855432884 |
| Fut8          | 6.1345   | 7.173    | 0.855220968 |
| Isoc2a        | 1.897    | 2.2185   | 0.855082263 |
| Golga2        | 12.533   | 14.6595  | 0.854940482 |
| 2500003M10Rik | 46.472   | 54.3615  | 0.854869715 |
| Fam174a       | 8.538    | 9.9905   | 0.854611881 |
| Ccdc40        | 2.4915   | 2.9155   | 0.8545704   |
| Cops4         | 50.4915  | 59.108   | 0.85422447  |
| Arv1          | 1.872    | 2.1915   | 0.854209446 |
| Npy2r         | 7.319    | 8.5685   | 0.854175177 |
| Nop58         | 15.249   | 17.853   | 0.854142161 |
| Dnajc10       | 13.325   | 15.6005  | 0.85413929  |
| Caln1         | 5.999    | 7.0245   | 0.854010962 |
| Fam96a        | 29.1635  | 34.1495  | 0.853994934 |
| Rasgrf2       | 19.9625  | 23.376   | 0.853974162 |
| Cirbp         | 44.4825  | 52.1     | 0.853790787 |
| Zfp386        | 8.9565   | 10.492   | 0.8536504   |
| BC005624      | 112.7145 | 132.0415 | 0.853629351 |
| Rnf217        | 3.8045   | 4.457    | 0.853601077 |
| LOC100504737  | 5.015    | 5.8755   | 0.853544379 |
| Gm8730        | 4.1625   | 4.8775   | 0.853408508 |
| Tnpo2         | 29.982   | 35.135   | 0.853337128 |
| Scaper        | 11.2285  | 13.161   | 0.853164653 |
| Use1          | 32.927   | 38.595   | 0.853141599 |
| A430033K04Rik | 10.106   | 11.847   | 0.853042964 |
| BC017612      | 8.6625   | 10.158   | 0.852776137 |
| Nav3          | 8.663    | 10.159   | 0.852741412 |
| Npepps        | 29.601   | 34.713   | 0.852735286 |
| Usp48         | 7.335    | 8.6045   | 0.852460922 |
| 6030419C18Rik | 4.2955   | 5.0405   | 0.852197203 |
| Irs2          | 13.9815  | 16.4095  | 0.85203693  |
| Mosc2         | 7.8805   | 9.25     | 0.851945946 |



|               |          |          |             |
|---------------|----------|----------|-------------|
| Rapgef2       | 25.4255  | 29.848   | 0.851832619 |
| Vac14         | 18.543   | 21.772   | 0.851690244 |
| BC003331      | 10.0725  | 11.829   | 0.851509003 |
| Helq          | 1.588    | 1.865    | 0.851474531 |
| Dgki          | 4.374    | 5.138    | 0.851304009 |
| Ptma          | 259.8515 | 305.2875 | 0.851169799 |
| Mc3r          | 1.4305   | 1.6815   | 0.850728516 |
| Csf1          | 8.755    | 10.2915  | 0.850702036 |
| Mrpl9         | 22.4385  | 26.377   | 0.850684308 |
| BC017647      | 54.6995  | 64.303   | 0.85065238  |
| Sobp          | 20.474   | 24.0715  | 0.850549405 |
| Sec62         | 32.1135  | 37.7565  | 0.850542291 |
| Gda           | 8.9735   | 10.5505  | 0.850528411 |
| Khsrp         | 26.3975  | 31.0375  | 0.850503423 |
| Mtor          | 15.601   | 18.355   | 0.849959139 |
| Gm6635        | 10.0795  | 11.861   | 0.849801872 |
| 9030025P20Rik | 8.786    | 10.3395  | 0.849750955 |
| Zc3h13        | 20.9635  | 24.6705  | 0.849739568 |
| Zik1          | 2.949    | 3.4705   | 0.849733468 |
| Alkbh6        | 49.939   | 58.774   | 0.849678429 |
| Htt           | 9.171    | 10.794   | 0.849638688 |
| Errfi1        | 23.0095  | 27.0895  | 0.849388139 |
| Oplah         | 1.067    | 1.2565   | 0.849184242 |
| Ap1b1         | 20.119   | 23.6925  | 0.849171679 |
| Ndufaf4       | 12.448   | 14.6595  | 0.849142194 |
| Rab1          | 209.7735 | 247.044  | 0.849134162 |
| Zfp560        | 1.7055   | 2.009    | 0.848929816 |
| Hcfc2         | 4.18     | 4.925    | 0.848730964 |
| Ttbk1         | 5.5725   | 6.5665   | 0.8486256   |
| Galnt11       | 26.731   | 31.5025  | 0.84853583  |
| Sorbs2        | 14.2385  | 16.781   | 0.848489363 |
| Fbxo8         | 3.3005   | 3.8905   | 0.848348541 |
| Parg          | 5.539    | 6.53     | 0.848238897 |
| Gm166         | 1.288    | 1.519    | 0.847926267 |
| Gm2058        | 48.864   | 57.629   | 0.847906436 |
| Cbx4          | 6.2315   | 7.3495   | 0.847880808 |
| Wdr82         | 28.948   | 34.1425  | 0.847858241 |
| Ring1         | 10.879   | 12.838   | 0.847406138 |
| Pcgf2         | 19.5185  | 23.034   | 0.847377789 |
| Ppp6r3        | 13.302   | 15.698   | 0.847369092 |
| B3gnt11       | 1.1925   | 1.4075   | 0.847246892 |
| Tomt          | 3.778    | 4.4595   | 0.847180177 |
| Furin         | 1.166    | 1.3765   | 0.847075917 |
| Vkorc111      | 33.154   | 39.1395  | 0.84707265  |
| Parp16        | 1.285    | 1.517    | 0.847066579 |
| Ssr1          | 26.363   | 31.124   | 0.84703123  |
| Metrn1        | 1.251    | 1.477    | 0.846987136 |
| Ints10        | 11.461   | 13.5345  | 0.846798921 |
| Fh1           | 33.804   | 39.92    | 0.846793587 |
| Sugt1         | 7.2605   | 8.575    | 0.846705539 |
| Ldhb          | 394.181  | 465.7325 | 0.846367818 |
| Atg12         | 16.217   | 19.1615  | 0.84633249  |
| Ehbp1         | 12.6295  | 14.923   | 0.846311063 |
| Haus6         | 1.0385   | 1.2275   | 0.846028513 |
| Kpna1         | 14.2065  | 16.7935  | 0.845952303 |

|               |         |         |             |
|---------------|---------|---------|-------------|
| Dph2          | 2.087   | 2.4675  | 0.845795339 |
| Terf2         | 48.221  | 57.0475 | 0.845278058 |
| Rnf14         | 84.898  | 100.44  | 0.845260852 |
| Epha6         | 4.2005  | 4.9695  | 0.845256062 |
| 9630033F20Rik | 6.5815  | 7.7875  | 0.845136437 |
| Ddx49         | 6.535   | 7.7325  | 0.845134174 |
| Raly1         | 44.3675 | 52.5005 | 0.84508719  |
| Zic1          | 42.3315 | 50.0985 | 0.844965418 |
| Cul7          | 4.462   | 5.281   | 0.844915736 |
| Hnrnp3        | 34.2045 | 40.5025 | 0.844503426 |
| Ldhd          | 5.1795  | 6.1345  | 0.844323091 |
| Txnrd1        | 13.72   | 16.25   | 0.844307692 |
| Klhl12        | 4.891   | 5.793   | 0.844294839 |
| Sccpdh        | 45.36   | 53.748  | 0.843938379 |
| Syt17         | 27.5005 | 32.588  | 0.843884252 |
| Cdk10         | 13.2135 | 15.6595 | 0.843800888 |
| Pstk          | 12.144  | 14.3935 | 0.843714177 |
| 1110014N23Rik | 8.1375  | 9.6475  | 0.843482768 |
| Acsl6         | 18.495  | 21.934  | 0.843211453 |
| Ints8         | 9.4245  | 11.1795 | 0.843016235 |
| Lypd6         | 10.1775 | 12.073  | 0.84299677  |
| Znhit6        | 17.325  | 20.552  | 0.842983651 |
| Pkd1          | 3.4655  | 4.111   | 0.842982243 |
| Clp1          | 3.589   | 4.258   | 0.842883983 |
| Fuca2         | 5.849   | 6.9415  | 0.842613268 |
| Map2k6        | 3.533   | 4.195   | 0.842193087 |
| Mtss1         | 26.2525 | 31.179  | 0.841993008 |
| Ubr3          | 20.2395 | 24.0435 | 0.841786761 |
| Mesdc2        | 21.1865 | 25.1685 | 0.84178636  |
| Pdk2          | 56.972  | 67.683  | 0.841747558 |
| Maneal        | 9.9155  | 11.7845 | 0.841401841 |
| Jmjd6         | 6.5895  | 7.832   | 0.841355975 |
| Ei24          | 14.263  | 16.9525 | 0.841350833 |
| LOC100503813  | 2.7975  | 3.3255  | 0.841226883 |
| LOC100504422  | 3.789   | 4.505   | 0.841065483 |
| Arl4c         | 50.852  | 60.4765 | 0.840855539 |
| Qdpr          | 56.5745 | 67.2875 | 0.840787665 |
| Pcdh10        | 30.2625 | 36.0015 | 0.840589975 |
| Arg2          | 2.2285  | 2.6515  | 0.84046766  |
| Aldh18a1      | 6.498   | 7.7325  | 0.840349176 |
| Pkmyt1        | 1.255   | 1.4935  | 0.840308001 |
| Kif1a         | 151.696 | 180.551 | 0.84018366  |
| Sesn1         | 13.685  | 16.29   | 0.840085942 |
| Ubac1         | 5.631   | 6.7045  | 0.83988366  |
| Metap1        | 22.69   | 27.019  | 0.839779414 |
| Zfp511        | 5.9545  | 7.093   | 0.839489638 |
| Rnaset2b      | 4.468   | 5.3235  | 0.839297455 |
| Fam123a       | 6.3385  | 7.554   | 0.839091872 |
| Tdrd5         | 1.047   | 1.248   | 0.838942308 |
| Ppif          | 37.3035 | 44.491  | 0.838450473 |
| Htr5a         | 5.1475  | 6.1405  | 0.838286784 |
| Rnf157        | 81.1145 | 96.7625 | 0.838284459 |
| Cdk11b        | 28.843  | 34.4075 | 0.838276539 |
| Npy1r         | 8.1775  | 9.7565  | 0.838159176 |
| Spata2L       | 5.0145  | 5.983   | 0.838124687 |

|               |         |          |             |
|---------------|---------|----------|-------------|
| Chd4          | 20.4215 | 24.3765  | 0.837753574 |
| Snx6          | 18.7605 | 22.3945  | 0.837728014 |
| Iglon5        | 31.53   | 37.6415  | 0.837639308 |
| Aldoart1      | 1.91    | 2.2805   | 0.837535628 |
| Cars          | 4.922   | 5.877    | 0.837502127 |
| Gm10395       | 5.114   | 6.1065   | 0.837468272 |
| Gm9746        | 5.114   | 6.1065   | 0.837468272 |
| Zmym2         | 17.2835 | 20.638   | 0.837460025 |
| Cytsb         | 31.0745 | 37.1205  | 0.837125039 |
| Orc6l         | 9.921   | 11.855   | 0.836862084 |
| Usp34         | 11.8235 | 14.1285  | 0.836854585 |
| Dlg5          | 7.4105  | 8.856    | 0.836777326 |
| Tmem64        | 7.91    | 9.453    | 0.836771395 |
| Srp54a        | 32.599  | 38.96    | 0.836729979 |
| Capza1        | 15.5315 | 18.5635  | 0.836668732 |
| Zfml          | 9.796   | 11.709   | 0.836621402 |
| Xkr8          | 4.321   | 5.165    | 0.836592449 |
| Asb4          | 12.066  | 14.4265  | 0.8363775   |
| Pcdhgc4       | 8.446   | 10.0985  | 0.836361836 |
| Dapk1         | 10.921  | 13.0605  | 0.836185445 |
| Ccdc23        | 6.1435  | 7.3475   | 0.83613474  |
| E130112L23Rik | 1.982   | 2.371    | 0.835934205 |
| Flt3          | 1.0435  | 1.2485   | 0.835802964 |
| Nr1d1         | 73.1345 | 87.532   | 0.835517297 |
| Nat6          | 8.57    | 10.2575  | 0.83548623  |
| Zbtb17        | 2.215   | 2.6515   | 0.835376202 |
| Atg2a         | 4.2305  | 5.0645   | 0.835324316 |
| Stim2         | 6.211   | 7.4355   | 0.83531706  |
| Rbp1          | 2.383   | 2.8535   | 0.835114771 |
| Slc37a3       | 3.412   | 4.086    | 0.8350465   |
| Med27         | 18.6285 | 22.3085  | 0.835040455 |
| Zfp451        | 6.098   | 7.303    | 0.834999315 |
| Gemin8        | 6.373   | 7.633    | 0.834927289 |
| Csde1         | 101.424 | 121.4825 | 0.834885683 |
| Tceal8        | 18.9875 | 22.7445  | 0.834817209 |
| 3200002M19Rik | 7.7675  | 9.3045   | 0.834811113 |
| Tuba1c        | 1.579   | 1.8925   | 0.834346103 |
| Cdc27         | 19.727  | 23.6445  | 0.834316649 |
| Neur1la       | 6.332   | 7.5905   | 0.834200646 |
| Cadps         | 96.6815 | 115.9025 | 0.834162335 |
| Zfp655        | 7.3175  | 8.7725   | 0.834140781 |
| Exosc7        | 13.158  | 15.7765  | 0.834025291 |
| Till1         | 60.321  | 72.3385  | 0.833871313 |
| Srrt          | 21.777  | 26.117   | 0.833824712 |
| Cacna1i       | 3.654   | 4.3825   | 0.833770679 |
| Tpd52l2       | 24.2935 | 29.137   | 0.833768061 |
| Amd2          | 1.233   | 1.479    | 0.8336714   |
| 1810041L15Rik | 25.2265 | 30.2615  | 0.833616972 |
| Syf2          | 31.7065 | 38.035   | 0.833613777 |
| Ooep          | 5.9685  | 7.161    | 0.833472979 |
| Camk1g        | 14.1405 | 16.9665  | 0.833436478 |
| Ctnn          | 19.133  | 22.9605  | 0.833300669 |
| Wrb           | 44.0245 | 52.833   | 0.833276551 |
| Armc1         | 40.375  | 48.4655  | 0.833066821 |
| Uba2          | 20.4595 | 24.5605  | 0.833024572 |

|               |          |          |             |
|---------------|----------|----------|-------------|
| Lonrf1        | 16.8405  | 20.2165  | 0.833007692 |
| Zdhhc7        | 12.348   | 14.8235  | 0.833001653 |
| Hsp90ab1      | 510.993  | 613.444  | 0.83299046  |
| Gm14303       | 257.061  | 308.638  | 0.832888368 |
| Fbxo45        | 9.4145   | 11.305   | 0.832773109 |
| Slitrk5       | 13.38    | 16.067   | 0.832762806 |
| Tatdn2        | 4.2475   | 5.101    | 0.832679867 |
| Pknox2        | 9.819    | 11.7935  | 0.832577267 |
| Gtf2ird1      | 5.8755   | 7.058    | 0.83245962  |
| Ncl           | 46.7275  | 56.1345  | 0.832420348 |
| Rbm27         | 14.6245  | 17.57    | 0.832356289 |
| Mcm7          | 1.71     | 2.0545   | 0.832319299 |
| Dmtf1         | 8.807    | 10.582   | 0.832262332 |
| Gm6293        | 1.027    | 1.234    | 0.832252836 |
| Fam188a       | 9.995    | 12.01    | 0.832223147 |
| Ptgr2         | 11.182   | 13.4365  | 0.832210769 |
| Pygb          | 34.507   | 41.4705  | 0.832085458 |
| Usp7          | 15.2975  | 18.3855  | 0.832041554 |
| Plekhm3       | 9.421    | 11.326   | 0.831802931 |
| Asah2         | 3.9685   | 4.771    | 0.831796269 |
| 6330416G13Rik | 2.003    | 2.4085   | 0.831637949 |
| Fbf1          | 4.3255   | 5.2025   | 0.831427198 |
| Enpp5         | 26.714   | 32.142   | 0.831124386 |
| Ddi2          | 6.2345   | 7.5015   | 0.831100447 |
| Trpt1         | 15.1675  | 18.2505  | 0.831073121 |
| Map4k3        | 16.0505  | 19.3205  | 0.830749722 |
| Rab6          | 155.248  | 186.8855 | 0.830711853 |
| Pcdhga3       | 4.9525   | 5.9635   | 0.830468684 |
| Ppp1r12c      | 14.2435  | 17.1545  | 0.830306917 |
| Zfp260        | 8.202    | 9.8785   | 0.830287999 |
| Fmpd3         | 2.671    | 3.2175   | 0.83014763  |
| Cx3cl1        | 36.364   | 43.8075  | 0.830086172 |
| Snx16         | 5.774    | 6.959    | 0.829716913 |
| Upf2          | 15.1755  | 18.2905  | 0.82969301  |
| Sec22b        | 40.883   | 49.283   | 0.829555831 |
| D19Erttd737e  | 16.8505  | 20.314   | 0.829501821 |
| Itm2b         | 93.0245  | 112.1455 | 0.829498286 |
| Igfbp3        | 2.4725   | 2.981    | 0.829419658 |
| Rimbp2        | 7.003    | 8.444    | 0.829346281 |
| Por           | 14.5965  | 17.6015  | 0.829275914 |
| Agap2         | 23.046   | 27.795   | 0.829141932 |
| Scn3b         | 16.6815  | 20.12    | 0.829100398 |
| D4Wsu53e      | 31.018   | 37.412   | 0.82909227  |
| Zfp64         | 3.482    | 4.2      | 0.829047619 |
| Hnf1b         | 4.7495   | 5.729    | 0.829027754 |
| Rnf181        | 38.4065  | 46.329   | 0.828994798 |
| Rab35         | 17.044   | 20.56    | 0.828988327 |
| Got2          | 130.2115 | 157.165  | 0.828501893 |
| Nicn1         | 70.618   | 85.2435  | 0.828426801 |
| Mef2d         | 76.9     | 92.827   | 0.828422765 |
| Ikzf5         | 8.5675   | 10.343   | 0.828338006 |
| Cd200         | 54.7805  | 66.1515  | 0.828106694 |
| Rnf6          | 22.6595  | 27.373   | 0.827804771 |
| Pi4ka         | 38.333   | 46.3255  | 0.827470831 |
| Lclat1        | 12.8045  | 15.4745  | 0.827458076 |

|               |          |          |             |
|---------------|----------|----------|-------------|
| Lrrc4c        | 58.607   | 70.828   | 0.827455244 |
| Pfkfb3        | 7.4075   | 8.9525   | 0.827422508 |
| Rbm5          | 32.253   | 38.9835  | 0.827350033 |
| Seh11         | 8.0595   | 9.7415   | 0.827336652 |
| Cul5          | 10.2555  | 12.396   | 0.82732333  |
| Afap1         | 6.8545   | 8.287    | 0.827138892 |
| Mapre2        | 222.724  | 269.2905 | 0.827077078 |
| Adsl          | 9.298    | 11.2425  | 0.827040249 |
| Pnrc1         | 52.7035  | 63.7365  | 0.826896676 |
| Pank2         | 9.42     | 11.3925  | 0.826859776 |
| 1600021P15Rik | 12.651   | 15.302   | 0.826754673 |
| Sdad1         | 7.986    | 9.6605   | 0.826665286 |
| Nsdhl         | 9.533    | 11.5335  | 0.826548749 |
| Gan           | 4.7105   | 5.701    | 0.826258551 |
| Rad17         | 2.4995   | 3.0255   | 0.826144439 |
| Rcc2          | 21.9175  | 26.5405  | 0.82581338  |
| Pkd2l2        | 4.011    | 4.858    | 0.825648415 |
| Ccdc67        | 2.654    | 3.215    | 0.825505443 |
| Peg3          | 426.6285 | 516.85   | 0.825439683 |
| Prrt1         | 38.2525  | 46.345   | 0.825385694 |
| Txndc9        | 8.119    | 9.837    | 0.825353258 |
| Mkl2          | 66.5115  | 80.611   | 0.825092109 |
| Hspa4         | 62.5985  | 75.8725  | 0.825048601 |
| Arfrp1        | 7.8875   | 9.5605   | 0.825009152 |
| Lass6         | 11.338   | 13.7445  | 0.824911783 |
| Casp3         | 1.411    | 1.7105   | 0.824904999 |
| AA408296      | 3.542    | 4.294    | 0.824871914 |
| St13          | 58.12    | 70.4715  | 0.824730565 |
| Dhx37         | 3.1975   | 3.8775   | 0.824629271 |
| Pdia3         | 23.292   | 28.2475  | 0.824568546 |
| 5330417C22Rik | 9.6705   | 11.7285  | 0.824529991 |
| LOC100504025  | 1.625    | 1.971    | 0.824454592 |
| Calm1         | 834.6175 | 1012.608 | 0.824225663 |
| Csdc2         | 78.8405  | 95.656   | 0.824208623 |
| Nmt2          | 14.656   | 17.785   | 0.824065224 |
| Arid1b        | 4.788    | 5.8105   | 0.824025471 |
| Kalrn         | 8.255    | 10.018   | 0.82401677  |
| Exoc6b        | 31.436   | 38.15    | 0.824010485 |
| Sfswap        | 8.3565   | 10.1415  | 0.823990534 |
| Vwa1          | 1.9375   | 2.352    | 0.823767007 |
| Rap1gap2      | 19.8845  | 24.1435  | 0.823596413 |
| Angptl6       | 1.3195   | 1.6025   | 0.823400936 |
| Ssb           | 55.2115  | 67.06    | 0.823314942 |
| Kdm2b         | 2.5735   | 3.126    | 0.823256558 |
| Tardbp        | 20.8625  | 25.345   | 0.823140659 |
| Phyhipl       | 94.2175  | 114.4645 | 0.823115464 |
| Nmnat2        | 64.874   | 78.8175  | 0.823091319 |
| Ipo5          | 23.633   | 28.7135  | 0.823062323 |
| Adra1a        | 3.3505   | 4.071    | 0.823016458 |
| H2-Ke6        | 8.029    | 9.756    | 0.82298073  |
| Ngef          | 9.454    | 11.488   | 0.822945682 |
| Accn1         | 20.085   | 24.4065  | 0.822936513 |
| Ubxn6         | 29.017   | 35.2615  | 0.822908838 |
| Senp8         | 4.5105   | 5.4815   | 0.822858707 |
| Srrm4         | 22.9395  | 27.8785  | 0.822838388 |

|               |         |         |             |
|---------------|---------|---------|-------------|
| Heatr1        | 1.812   | 2.2025  | 0.822701476 |
| Zkscan6       | 3.338   | 4.0575  | 0.82267406  |
| Extl1         | 1.795   | 2.182   | 0.82263978  |
| Lrtm2         | 17.558  | 21.3435 | 0.822639211 |
| Tbc1d8b       | 2.1025  | 2.556   | 0.822574335 |
| Spg21         | 12.9035 | 15.6885 | 0.822481435 |
| Wdr34         | 18.6525 | 22.6815 | 0.822366246 |
| 4930432O21Rik | 3.291   | 4.003   | 0.8221334   |
| Rnf182        | 1.931   | 2.349   | 0.822051937 |
| Ece2          | 7.4305  | 9.039   | 0.822048899 |
| Rasgrf2       | 27.653  | 33.641  | 0.822002913 |
| Pik3r5        | 6.5065  | 7.9185  | 0.8216834   |
| Sdccag1       | 14.6315 | 17.807  | 0.821671253 |
| Sort1         | 21.2955 | 25.9175 | 0.821664898 |
| Cbx1          | 13.4765 | 16.4045 | 0.82151239  |
| Zfp873        | 1.4305  | 1.7415  | 0.821418318 |
| Exoc3         | 18.2245 | 22.192  | 0.821219358 |
| Zfp653        | 2.812   | 3.425   | 0.821021898 |
| Wapal         | 8.5535  | 10.4215 | 0.82075517  |
| Rab3b         | 61.198  | 74.5655 | 0.820728085 |
| Rnmt          | 12.332  | 15.0265 | 0.820683459 |
| Senp2         | 19.2515 | 23.466  | 0.820399727 |
| AI452195      | 31.803  | 38.78   | 0.820087674 |
| Sh3gl3        | 31.6025 | 38.544  | 0.819907119 |
| Large         | 12.7995 | 15.6145 | 0.819718851 |
| Rit1          | 6.1135  | 7.4585  | 0.819668834 |
| Gnpat         | 12.284  | 14.9885 | 0.819561664 |
| Ngly1         | 3.5685  | 4.355   | 0.819402985 |
| Apbb1         | 37.1335 | 45.3235 | 0.819299039 |
| Tmtc3         | 3.9195  | 4.784   | 0.819293478 |
| Gm347         | 7.602   | 9.283   | 0.818916299 |
| Mapt          | 78.5925 | 95.9765 | 0.818872328 |
| Cab39         | 36.907  | 45.077  | 0.818754576 |
| Cadm4         | 15.608  | 19.069  | 0.818501232 |
| Rif1          | 3.0665  | 3.747   | 0.818388044 |
| Bap1          | 17.099  | 20.894  | 0.81836891  |
| Otud6b        | 13.5455 | 16.553  | 0.81831088  |
| Birc2         | 5.8185  | 7.111   | 0.818239347 |
| Pink1         | 47.1755 | 57.6745 | 0.817961144 |
| Cfl2          | 28.378  | 34.6995 | 0.817821582 |
| Arhgef3       | 10.7545 | 13.152  | 0.817708333 |
| Slc35f5       | 4.3215  | 5.2855  | 0.817614228 |
| Ntrk3         | 18.4965 | 22.6235 | 0.817579066 |
| Rgs4          | 33.4835 | 40.974  | 0.817188949 |
| Slc2a3        | 23.819  | 29.1485 | 0.817160403 |
| Htr1b         | 6.7505  | 8.261   | 0.817152887 |
| Usp24         | 9.9405  | 12.1665 | 0.81703859  |
| Fam171a1      | 5.2735  | 6.4555  | 0.816900318 |
| Cdk15         | 29.891  | 36.593  | 0.816850217 |
| Epm2aip1      | 29.896  | 36.6    | 0.816830601 |
| Ehd1          | 3.432   | 4.202   | 0.816753927 |
| Rpp40         | 4.908   | 6.0105  | 0.816571001 |
| Jup           | 8.6935  | 10.6465 | 0.816559433 |
| D130043K22Rik | 5.022   | 6.1505  | 0.816518982 |
| Cog4          | 13.5565 | 16.609  | 0.816214101 |

|               |         |         |             |
|---------------|---------|---------|-------------|
| Atcay         | 45.574  | 55.845  | 0.816080222 |
| Frat2         | 11.774  | 14.429  | 0.815995564 |
| BC003266      | 13.97   | 17.1205 | 0.815980842 |
| Ctdp1         | 4.9345  | 6.0475  | 0.815957007 |
| Zbtb7c        | 3.03    | 3.714   | 0.815831987 |
| Trip12        | 20.12   | 24.663  | 0.815796943 |
| Pcyox1        | 17.847  | 21.88   | 0.815676417 |
| Lrrc55        | 8.4165  | 10.319  | 0.81563136  |
| Setd2         | 13.3005 | 16.3075 | 0.815606316 |
| Accn2         | 14.2405 | 17.461  | 0.815560392 |
| Zfp597        | 4.618   | 5.6625  | 0.815540839 |
| Whrn          | 4.0555  | 4.973   | 0.81550372  |
| B3galnt1      | 15.582  | 19.1085 | 0.815448622 |
| Gnpda1        | 11.852  | 14.536  | 0.815354981 |
| Xbp1          | 28.3125 | 34.735  | 0.815100043 |
| Kidins220     | 40.0365 | 49.1205 | 0.815067029 |
| Camk2d        | 42.394  | 52.0145 | 0.815041959 |
| Gabrg2        | 15.268  | 18.739  | 0.814771333 |
| Nr2e1         | 2.41    | 2.9595  | 0.814326744 |
| Yipf5         | 10.171  | 12.491  | 0.814266272 |
| Pias2         | 13.0625 | 16.0425 | 0.814243416 |
| 4930503L19Rik | 3.253   | 3.9955  | 0.814165937 |
| Vps39         | 26.6855 | 32.7795 | 0.814091124 |
| Ift140        | 1.9505  | 2.396   | 0.814065109 |
| Cnr1          | 12.9765 | 15.941  | 0.814032997 |
| Arhgef7       | 14.9785 | 18.4025 | 0.813938324 |
| Rusc2         | 31.7775 | 39.0525 | 0.81371231  |
| AI464131      | 2.164   | 2.66    | 0.813533835 |
| Xpo1          | 7.127   | 8.761   | 0.813491611 |
| Sec31a        | 40.124  | 49.337  | 0.813263879 |
| Lgals8        | 30.6225 | 37.655  | 0.813238614 |
| BC018507      | 14.156  | 17.407  | 0.813236054 |
| Gnb4          | 5.168   | 6.3555  | 0.813153961 |
| Rgs20         | 12.713  | 15.6345 | 0.813137612 |
| Nf1           | 24.1505 | 29.7015 | 0.813107082 |
| Gdpd1         | 29.568  | 36.369  | 0.813000082 |
| Gria3         | 29.6175 | 36.438  | 0.812819035 |
| Zbtb41        | 3.598   | 4.427   | 0.812740005 |
| Cuedc2        | 25.9325 | 31.914  | 0.812574419 |
| Ift46         | 12.671  | 15.5975 | 0.812373778 |
| Hspbap1       | 4.2275  | 5.204   | 0.81235588  |
| BC004004      | 10.286  | 12.6625 | 0.812319842 |
| Coch          | 3.421   | 4.212   | 0.812203229 |
| Kif3c         | 34.6895 | 42.714  | 0.812134195 |
| Ankrd13a      | 10.742  | 13.228  | 0.812065316 |
| Htr2c         | 12.872  | 15.851  | 0.81206233  |
| Asxl1         | 7.2235  | 8.8955  | 0.812039795 |
| Mettl2        | 8.9505  | 11.0225 | 0.812020866 |
| Ppp1r9a       | 33.353  | 41.089  | 0.811725766 |
| Sik1          | 4.9205  | 6.0625  | 0.811628866 |
| Prkar2b       | 15.184  | 18.7105 | 0.811522942 |
| Zswim4        | 2.7975  | 3.4475  | 0.811457578 |
| Cux2          | 5.471   | 6.7425  | 0.811420096 |
| Wdr53         | 14.013  | 17.27   | 0.811407064 |
| Ltbp3         | 3.0025  | 3.7005  | 0.811376841 |

|               |          |          |             |
|---------------|----------|----------|-------------|
| Slitrk2       | 3.7335   | 4.6015   | 0.811365859 |
| Snpc2         | 12.093   | 14.9065  | 0.811256834 |
| Mtmr6         | 12.533   | 15.449   | 0.811249919 |
| Cct7          | 55.993   | 69.0305  | 0.811134209 |
| Gfm2          | 3.2495   | 4.0065   | 0.811057032 |
| Agbl5         | 4.918    | 6.064    | 0.811015831 |
| Wasf1         | 35.8435  | 44.2105  | 0.810746316 |
| 2610507B11Rik | 28.4775  | 35.128   | 0.810678092 |
| Tnfsf13b      | 1.976    | 2.4375   | 0.810666667 |
| Apba2         | 22.4995  | 27.7565  | 0.810602922 |
| Gak           | 20.839   | 25.7155  | 0.810367288 |
| Oxsm          | 3.68     | 4.5415   | 0.810304965 |
| Rnf219        | 9.8835   | 12.2005  | 0.81008975  |
| Nipbl         | 6.8005   | 8.395    | 0.810065515 |
| Camta1        | 184.9185 | 228.2905 | 0.810013995 |
| Eif3g         | 84.59    | 104.452  | 0.809845671 |
| Lrrc7         | 13.2315  | 16.3395  | 0.809786101 |
| Stx1b         | 143.3715 | 177.065  | 0.809711123 |
| Agpat9        | 1.887    | 2.3305   | 0.80969749  |
| Lphn2         | 10.887   | 13.4475  | 0.809592861 |
| Rps6          | 163.2755 | 201.6835 | 0.809563003 |
| Bet1          | 5.9125   | 7.3035   | 0.80954337  |
| Rpap3         | 8.471    | 10.4655  | 0.809421432 |
| Aimp2         | 16.9325  | 20.9195  | 0.809412271 |
| Nol3          | 23.5605  | 29.112   | 0.809305441 |
| Dynlt1a       | 8.9385   | 11.0475  | 0.809097081 |
| Smad2         | 12.558   | 15.5235  | 0.80896705  |
| Ssrp1         | 15.786   | 19.518   | 0.808791884 |
| Pnmal1        | 31.602   | 39.079   | 0.808669618 |
| Cdh13         | 25.5575  | 31.6055  | 0.808640901 |
| Dcun1d2       | 11.761   | 14.546   | 0.80853843  |
| Zbtb11        | 764.085  | 945.558  | 0.808078404 |
| Ccnc          | 18.278   | 22.6195  | 0.808063839 |
| Haus7         | 5.5365   | 6.8535   | 0.807835413 |
| Jakmip3       | 12.263   | 15.1855  | 0.807546673 |
| Smarcc2       | 88.4155  | 109.4955 | 0.807480673 |
| Dscaml1       | 3.1665   | 3.922    | 0.807368689 |
| Ptprj         | 9.284    | 11.5     | 0.807304348 |
| Vsnl1         | 1922.548 | 2381.507 | 0.807282112 |
| Alg12         | 3.86     | 4.7815   | 0.807278051 |
| Arhgap26      | 25.1535  | 31.159   | 0.807262749 |
| Plekhg5       | 3.676    | 4.5545   | 0.807113843 |
| Brpf1         | 6.2525   | 7.748    | 0.806982447 |
| Midn          | 20.9075  | 25.909   | 0.806958972 |
| Pygo1         | 25.3445  | 31.415   | 0.806764285 |
| Dock7         | 4.7395   | 5.876    | 0.806586113 |
| Frmd4a        | 9.7245   | 12.061   | 0.806276428 |
| Wdr48         | 15.8625  | 19.674   | 0.806267155 |
| Pak2          | 12.105   | 15.0145  | 0.806220653 |
| Smarca4       | 26.0715  | 32.3455  | 0.806031751 |
| Rbfox1        | 56.8135  | 70.491   | 0.805968138 |
| Mef2c         | 6.4285   | 7.9775   | 0.805828894 |
| Aff3          | 22.8635  | 28.379   | 0.805648543 |
| Smad4         | 9.9125   | 12.304   | 0.805632315 |
| Clec16a       | 12.006   | 14.908   | 0.805339415 |



|               |         |          |             |
|---------------|---------|----------|-------------|
| A730098P11Rik | 25.567  | 31.747   | 0.805335937 |
| Men1          | 10.7935 | 13.4045  | 0.805214667 |
| Got1          | 272.006 | 337.866  | 0.805070649 |
| Zmynd8        | 25.9865 | 32.281   | 0.805009139 |
| Zfp658        | 2.137   | 2.6555   | 0.804744869 |
| Fam43a        | 5.2075  | 6.471    | 0.804744244 |
| Fam13c        | 6.522   | 8.1055   | 0.804638825 |
| Zfp868        | 7.738   | 9.617    | 0.804616824 |
| Rab18         | 35.195  | 43.742   | 0.80460427  |
| 1110017D15Rik | 2.2225  | 2.7625   | 0.804524887 |
| Arhgap20      | 21.448  | 26.6615  | 0.804455863 |
| Cry1          | 6.1465  | 7.642    | 0.804305156 |
| Rsb1          | 9.3525  | 11.6285  | 0.804273982 |
| Usp11         | 111.176 | 138.2445 | 0.804198359 |
| Poli          | 4.014   | 4.9915   | 0.804167084 |
| Rcan2         | 90.9365 | 113.1085 | 0.803975829 |
| Cpsf2         | 12.163  | 15.132   | 0.803793286 |
| Raph1         | 13.295  | 16.5405  | 0.80378465  |
| Nxf1          | 25.1805 | 31.3285  | 0.803756963 |
| Mcat          | 2.551   | 3.1745   | 0.803591117 |
| Speg          | 3.6385  | 4.528    | 0.803555654 |
| Lasp1         | 27.329  | 34.0145  | 0.803451469 |
| Nt5c2         | 13.148  | 16.367   | 0.803323761 |
| Nfyb          | 6.5315  | 8.1315   | 0.803234336 |
| Gm11810       | 1.0605  | 1.3205   | 0.803104885 |
| Ppp1r14b      | 9.438   | 11.752   | 0.803097345 |
| Mrgpre        | 22.979  | 28.6135  | 0.803082461 |
| Ywhag         | 514.162 | 640.261  | 0.803050631 |
| Syt11         | 115.915 | 144.3445 | 0.803044106 |
| Oxct1         | 39.8735 | 49.6535  | 0.803035033 |
| Uhrf1bp1      | 3.889   | 4.8435   | 0.802931764 |
| Prp           | 1.804   | 2.247    | 0.802848242 |
| Tab1          | 3.134   | 3.904    | 0.802766393 |
| Cpne8         | 42.2655 | 52.6505  | 0.802755909 |
| Fam134c       | 4.4405  | 5.532    | 0.80269342  |
| Rbm7          | 5.2005  | 6.481    | 0.802422466 |
| Pspc1         | 15.1545 | 18.886   | 0.802419782 |
| Mbtps1        | 7.1005  | 8.85     | 0.802316384 |
| Rint1         | 8.641   | 10.772   | 0.802172299 |
| P4hb          | 26.9465 | 33.5925  | 0.80215822  |
| Gtf3a         | 15.383  | 19.1775  | 0.802137922 |
| Coq3          | 6.9835  | 8.7075   | 0.802009762 |
| Nudcd3        | 29.0515 | 36.225   | 0.801973775 |
| Mll1          | 26.5885 | 33.154   | 0.801969596 |
| Dnajc7        | 64.0795 | 79.907   | 0.801925989 |
| Tmem188       | 13.477  | 16.808   | 0.801820562 |
| Pibf1         | 2.7185  | 3.3905   | 0.801799145 |
| Gabra4        | 4.7385  | 5.9115   | 0.801573205 |
| Dcdc2a        | 2.3485  | 2.9305   | 0.801399079 |
| Fastkd2       | 1.9335  | 2.413    | 0.801284708 |
| Ncbp1         | 6.5675  | 8.1965   | 0.801256634 |
| Epb4.111      | 77.2015 | 96.351   | 0.801252711 |
| Klc4          | 3.5865  | 4.48     | 0.800558036 |
| Rab5b         | 40.642  | 50.773   | 0.800464814 |
| Eif4a2        | 132.386 | 165.4735 | 0.800043511 |

|               |          |          |             |
|---------------|----------|----------|-------------|
| Afg3l2        | 32.013   | 40.019   | 0.799945026 |
| RbmX          | 36.5255  | 45.6685  | 0.799796359 |
| Gpm6a         | 87.906   | 109.9215 | 0.799716161 |
| Wdr35         | 7.969    | 9.965    | 0.799698946 |
| Gtf2i         | 42.5635  | 53.232   | 0.799584836 |
| AcsL4         | 6.4075   | 8.014    | 0.799538308 |
| Vcan          | 2.1325   | 2.6675   | 0.799437676 |
| Myo18a        | 9.8315   | 12.3015  | 0.799211478 |
| Ccdc94        | 2.506    | 3.136    | 0.799107143 |
| Gtf2f1        | 40.677   | 50.9085  | 0.799021774 |
| Pigc          | 2.268    | 2.8395   | 0.798732171 |
| Lancl2        | 31.7355  | 39.746   | 0.798457706 |
| Nr2f2         | 23.4925  | 29.424   | 0.79841286  |
| AA415398      | 3.027    | 3.7915   | 0.798364763 |
| Ptdss1        | 10.8615  | 13.608   | 0.798170194 |
| Tmub2         | 4.586    | 5.746    | 0.798120432 |
| Exoc7         | 10.9     | 13.658   | 0.798067067 |
| Slc30a9       | 37.3095  | 46.75    | 0.798064171 |
| Ppfia2        | 22.5175  | 28.216   | 0.798040119 |
| Gpcpd1        | 7.4535   | 9.3415   | 0.797891131 |
| Pja2          | 81.7365  | 102.4425 | 0.797876858 |
| Carf          | 3.493    | 4.378    | 0.797852901 |
| Mepce         | 7.7605   | 9.729    | 0.797666769 |
| Rnf19a        | 6.1435   | 7.702    | 0.797649961 |
| Hsp90b1       | 87.5605  | 109.778  | 0.797614276 |
| A830010M20Rik | 20.3155  | 25.473   | 0.797530719 |
| Stxbp2        | 3.519    | 4.413    | 0.797416723 |
| Tomm70a       | 16.602   | 20.829   | 0.797061789 |
| Tbc1d20       | 14.7155  | 18.465   | 0.796940157 |
| Cdc37         | 25.349   | 31.8095  | 0.796900297 |
| Rab3gap2      | 12.246   | 15.37    | 0.79674691  |
| Zfp558        | 2.057    | 2.582    | 0.796669249 |
| 2610027L16Rik | 2.176    | 2.7315   | 0.796631887 |
| Chrn2         | 7.4275   | 9.325    | 0.796514745 |
| Zfp772        | 4.2075   | 5.2825   | 0.79649787  |
| 2310033P09Rik | 22.115   | 27.7665  | 0.796463364 |
| Ints9         | 7.119    | 8.939    | 0.796397807 |
| Dpp10         | 13.102   | 16.4535  | 0.796304738 |
| Mov10         | 2.0855   | 2.619    | 0.796296296 |
| Nudt19        | 9.011    | 11.317   | 0.796235752 |
| Clpx          | 7.0335   | 8.8345   | 0.796140132 |
| Timp2         | 168.6405 | 211.826  | 0.796127482 |
| Impact        | 208.4415 | 262.029  | 0.795490194 |
| Bckdk         | 7.9225   | 9.9595   | 0.79547166  |
| Kcnk1         | 11.381   | 14.3095  | 0.795345749 |
| Egln2         | 14.794   | 18.6015  | 0.795312206 |
| Gm7969        | 2.0795   | 2.6155   | 0.795067865 |
| Dgcr6         | 7.416    | 9.3295   | 0.794897904 |
| Gm4988        | 3.6585   | 4.6025   | 0.794894079 |
| Slc39a1       | 5.1135   | 6.433    | 0.794885745 |
| Cluap1        | 11.3815  | 14.3185  | 0.794880749 |
| Crim1         | 18.368   | 23.108   | 0.794876233 |
| Dpysl5        | 27.401   | 34.4755  | 0.794796305 |
| Pded6ip       | 24.674   | 31.0455  | 0.794768968 |
| Cyb561        | 9.2915   | 11.6915  | 0.794722662 |

|               |         |          |             |
|---------------|---------|----------|-------------|
| D030074E01Rik | 4.553   | 5.7295   | 0.79465922  |
| Pcdhac2       | 12.407  | 15.617   | 0.794454761 |
| Nav1          | 16.4795 | 20.744   | 0.794422484 |
| Shank2        | 7.0995  | 8.937    | 0.794394092 |
| Gpbp111       | 16.673  | 20.989   | 0.794368479 |
| 1190007F08Rik | 2.5075  | 3.157    | 0.794266709 |
| Dopey1        | 5.0035  | 6.3      | 0.794206349 |
| 0610010B08Rik | 3.5015  | 4.409    | 0.794171014 |
| Mfsd1         | 4.1005  | 5.1635   | 0.794131887 |
| Rab40b        | 4.171   | 5.2525   | 0.794098049 |
| Fbxo3         | 12.2015 | 15.37    | 0.793851659 |
| Usp12         | 17.068  | 21.5015  | 0.793805083 |
| Ubp1          | 13.945  | 17.569   | 0.793727588 |
| 4833420G17Rik | 22.2175 | 27.9935  | 0.793666387 |
| Dusp1         | 14.711  | 18.5355  | 0.793666208 |
| Mblac1        | 2.3125  | 2.914    | 0.793582704 |
| Lrp10         | 3.203   | 4.0365   | 0.793509228 |
| Chst2         | 32.3545 | 40.778   | 0.793430281 |
| Rpl17         | 302.428 | 381.183  | 0.7933932   |
| Nefm          | 123.763 | 156.005  | 0.793327137 |
| Dyrk1b        | 9.842   | 12.41    | 0.793070105 |
| Tmeff2        | 19.4135 | 24.486   | 0.792840807 |
| Rab11fip5     | 15.2475 | 19.232   | 0.79281926  |
| Ubn1          | 5.552   | 7.0035   | 0.792746484 |
| Pisd          | 17.147  | 21.6325  | 0.792649948 |
| AF529169      | 3.9905  | 5.0355   | 0.792473439 |
| Nkap          | 4.8315  | 6.0975   | 0.792373924 |
| Hmgbl         | 38.8655 | 49.057   | 0.79225187  |
| Klf10         | 1.7075  | 2.1555   | 0.792159592 |
| Ankrd26       | 7.4135  | 9.3635   | 0.79174454  |
| Usp3          | 3.062   | 3.8675   | 0.791725921 |
| Taldo1        | 14.2425 | 17.9895  | 0.791711832 |
| Star          | 4.1595  | 5.254    | 0.791682528 |
| Lame1         | 2.441   | 3.0835   | 0.791632885 |
| Sorcs2        | 2.667   | 3.369    | 0.791629564 |
| Myst3         | 13.3415 | 16.855   | 0.791545535 |
| 6720456H20Rik | 2.1945  | 2.7725   | 0.791523895 |
| Ythdf2        | 5.985   | 7.5615   | 0.791509621 |
| Gal3st3       | 11.6485 | 14.718   | 0.791445849 |
| Glyrl         | 26.855  | 33.9365  | 0.791330868 |
| Rpl14         | 237.268 | 299.8635 | 0.791253354 |
| Mppe1         | 3.77    | 4.765    | 0.791185729 |
| Vcpip1        | 12.6085 | 15.9375  | 0.791121569 |
| Canx          | 39.1035 | 49.4405  | 0.790920399 |
| Kif5b         | 28.988  | 36.653   | 0.790876599 |
| Ptchd1        | 4.0975  | 5.181    | 0.790870488 |
| Cdr2l         | 7.4885  | 9.47     | 0.790760296 |
| B230312A22Rik | 6.7225  | 8.502    | 0.790696307 |
| Adk           | 8.626   | 10.9105  | 0.790614546 |
| Dbnl          | 26.14   | 33.0655  | 0.790552086 |
| 2810006K23Rik | 15.726  | 19.9025  | 0.790151991 |
| 2900092E17Rik | 12.5255 | 15.8545  | 0.790028068 |
| Plekho1       | 7.668   | 9.7095   | 0.789742005 |
| Lgals3bp      | 25.2295 | 31.9475  | 0.789717505 |
| Maz           | 10.5415 | 13.3485  | 0.7897142   |

|               |         |         |             |
|---------------|---------|---------|-------------|
| Sec24a        | 5.289   | 6.6975  | 0.789697648 |
| Lrp1          | 11.3105 | 14.323  | 0.789673951 |
| Rps3a         | 314.469 | 398.258 | 0.789611257 |
| Dpp6          | 43.647  | 55.279  | 0.789576512 |
| Scn1a         | 18.0355 | 22.842  | 0.789576219 |
| Sulf1         | 4.5045  | 5.705   | 0.789570552 |
| D11Wsu99e     | 14.0865 | 17.841  | 0.78955776  |
| Prpf39        | 4.8485  | 6.1415  | 0.789465114 |
| Ccnt2         | 6.02    | 7.6255  | 0.789456429 |
| Slc12a5       | 50.897  | 64.473  | 0.789431235 |
| Zfp281        | 7.104   | 8.999   | 0.789421047 |
| Tubgcp2       | 7.3605  | 9.3245  | 0.789372084 |
| Srp68         | 43.1845 | 54.708  | 0.78936353  |
| Slc25a19      | 14.2435 | 18.046  | 0.789288485 |
| Dph3          | 9.233   | 11.698  | 0.789280219 |
| Srp72         | 46.039  | 58.34   | 0.789149811 |
| Mccc1         | 2.4875  | 3.1525  | 0.789056305 |
| Prkcz         | 21.1215 | 26.7685 | 0.789043092 |
| Unc79         | 7.712   | 9.775   | 0.788951407 |
| Pik3c3        | 14.9565 | 18.9585 | 0.78890735  |
| Dtx4          | 4.7745  | 6.053   | 0.788782422 |
| Tspo          | 1.314   | 1.666   | 0.788715486 |
| Tmem30a       | 23.5555 | 29.872  | 0.788547804 |
| Mast2         | 23.1855 | 29.403  | 0.788541986 |
| Bean          | 11.684  | 14.8185 | 0.788473867 |
| Smap1         | 42.235  | 53.572  | 0.788378257 |
| Rasa3         | 8.404   | 10.6615 | 0.788256812 |
| Osbpl3        | 1.327   | 1.6835  | 0.788238788 |
| Zfp235        | 3.082   | 3.911   | 0.788033751 |
| Sf3b1         | 18.784  | 23.837  | 0.788018627 |
| Git1          | 48.948  | 62.1175 | 0.787990502 |
| Nlgn3         | 47.144  | 59.8625 | 0.787538108 |
| Nedd4l        | 29.8875 | 37.9515 | 0.78751828  |
| D9Ert402e     | 9.154   | 11.6285 | 0.787203853 |
| Kcnh1         | 5.473   | 6.9525  | 0.787198849 |
| Hyi           | 8.1685  | 10.379  | 0.787021871 |
| Ccdc90b       | 14.088  | 17.902  | 0.786951179 |
| Setd4         | 1.407   | 1.788   | 0.786912752 |
| Lrrc40        | 5.656   | 7.1895  | 0.786702831 |
| Fbxo33        | 9.0625  | 11.521  | 0.786607065 |
| Dlat          | 21.236  | 27.0025 | 0.786445699 |
| Sptlc1        | 2.4965  | 3.175   | 0.786299213 |
| Urgcp         | 7.3755  | 9.382   | 0.786133021 |
| Ralgapa1      | 11.551  | 14.696  | 0.785996189 |
| Tarsl2        | 7.0915  | 9.023   | 0.785935941 |
| Pgd           | 13.0215 | 16.5695 | 0.785871632 |
| 1500001M20Rik | 3.233   | 4.1145  | 0.785757686 |
| Wac           | 35.5975 | 45.3045 | 0.785738724 |
| Kcnb2         | 4.5475  | 5.7885  | 0.785609398 |
| Plxna3        | 1.9535  | 2.487   | 0.78548452  |
| Med15         | 24.66   | 31.395  | 0.785475394 |
| Ankrd11       | 46.5575 | 59.281  | 0.78536968  |
| Fndc3b        | 5.271   | 6.7125  | 0.785251397 |
| Ptpmt1        | 6.2215  | 7.923   | 0.785245488 |
| AI846148      | 5.793   | 7.3775  | 0.785225347 |

|               |          |          |             |
|---------------|----------|----------|-------------|
| Gm5148        | 104.5655 | 133.1825 | 0.785129428 |
| Taco1         | 5.2695   | 6.713    | 0.784969462 |
| Tfb1m         | 5.5285   | 7.0465   | 0.784573902 |
| Myh10         | 34.9835  | 44.59    | 0.784559318 |
| 1600014C10Rik | 16.191   | 20.6385  | 0.784504688 |
| Madd          | 30.9355  | 39.4345  | 0.784478059 |
| Sh3gl1        | 5.947    | 7.584    | 0.784150844 |
| Lgr4          | 2.118    | 2.7015   | 0.784008884 |
| Smpd4         | 4.481    | 5.7155   | 0.784008398 |
| Nono          | 38.9905  | 49.763   | 0.783523903 |
| Nip7          | 10.4855  | 13.3835  | 0.783464714 |
| Ncam2         | 22.717   | 29.0005  | 0.783331322 |
| Gm5121        | 1.199    | 1.531    | 0.783148269 |
| Thumpd1       | 17.0455  | 21.773   | 0.782873283 |
| Rpl9          | 352.9105 | 450.836  | 0.782791303 |
| Dhx8          | 6.3625   | 8.1295   | 0.782643459 |
| Fam163b       | 21.9575  | 28.0565  | 0.782617219 |
| Me3           | 3.205    | 4.0955   | 0.782566231 |
| Sap30         | 2.3635   | 3.0205   | 0.782486343 |
| Fndc5         | 19.6875  | 25.163   | 0.78239876  |
| Rwdd4a        | 14.8175  | 18.9415  | 0.782277011 |
| Fastkd1       | 3.724    | 4.7615   | 0.782106479 |
| Pex3          | 4.5955   | 5.876    | 0.782079646 |
| Rph3a         | 115.0115 | 147.077  | 0.781981547 |
| Snx24         | 4.7945   | 6.1315   | 0.78194569  |
| Adprhl2       | 1.956    | 2.5015   | 0.781930841 |
| Cnih3         | 7.2925   | 9.3285   | 0.781744117 |
| Map2k1        | 75.976   | 97.1965  | 0.781674237 |
| Tnks1bp1      | 1.5165   | 1.9405   | 0.781499614 |
| Hnrnpm        | 25.088   | 32.103   | 0.781484596 |
| Kdelc2        | 3.722    | 4.764    | 0.781276238 |
| Lhfp13        | 15.8985  | 20.35    | 0.781253071 |
| 2610029I01Rik | 19.9595  | 25.5485  | 0.781239603 |
| Rcn1          | 7.878    | 10.084   | 0.781237604 |
| Map4k2        | 8.858    | 11.339   | 0.781197636 |
| Cd2bp2        | 10.7025  | 13.7035  | 0.781004853 |
| Celf3         | 31.4545  | 40.28    | 0.780896226 |
| Smug1         | 1.947    | 2.494    | 0.780673617 |
| Ptgs1         | 4.0015   | 5.1265   | 0.780552034 |
| Alkbh4        | 1.228    | 1.5735   | 0.780425802 |
| Mpnd          | 14.575   | 18.6825  | 0.780141844 |
| Casc4         | 32.353   | 41.4795  | 0.779975651 |
| Cntn1         | 45.933   | 58.8915  | 0.779959757 |
| 9330159F19Rik | 18.565   | 23.807   | 0.77981266  |
| Pex26         | 10.4925  | 13.456   | 0.779763674 |
| Ksr1          | 3.0175   | 3.87     | 0.779715762 |
| Snx4          | 20.938   | 26.855   | 0.779668591 |
| Acox1         | 35.488   | 45.521   | 0.77959623  |
| Polr1e        | 4.516    | 5.793    | 0.77956154  |
| Mbtps2        | 3.799    | 4.8735   | 0.779521904 |
| Cox6a2        | 2.839    | 3.642    | 0.779516749 |
| Hemk1         | 2.94     | 3.772    | 0.779427359 |
| Tln1          | 1.6965   | 2.177    | 0.779283418 |
| Ubxn2b        | 8.628    | 11.0725  | 0.779227817 |
| Zbtb24        | 3.833    | 4.9215   | 0.778827593 |

|               |          |          |             |
|---------------|----------|----------|-------------|
| Carns1        | 2.055    | 2.6395   | 0.778556545 |
| Zfp90         | 6.6825   | 8.586    | 0.778301887 |
| Eed           | 3.2455   | 4.1705   | 0.778204052 |
| 2700078E11Rik | 12.854   | 16.518   | 0.778181378 |
| 4922501C03Rik | 5.379    | 6.916    | 0.777761712 |
| Snrnp48       | 4.5035   | 5.7905   | 0.777739401 |
| Yaf2          | 40.2295  | 51.732   | 0.77765213  |
| Ephx2         | 1.5735   | 2.0235   | 0.777613047 |
| Ephb1         | 7.1605   | 9.2095   | 0.777512351 |
| Nomo1         | 11.142   | 14.3335  | 0.777339798 |
| Mon1b         | 12.336   | 15.871   | 0.777266713 |
| Trp53i11      | 43.1105  | 55.483   | 0.777003767 |
| Prkacb        | 257.4765 | 331.382  | 0.776977929 |
| Vps36         | 8.7525   | 11.265   | 0.776964048 |
| Zfp867        | 1.5095   | 1.9435   | 0.776691536 |
| Tsen2         | 3.9505   | 5.0865   | 0.776663718 |
| Atp2a2        | 100.6665 | 129.634  | 0.776543962 |
| Erf           | 3.014    | 3.883    | 0.776203966 |
| St5           | 2.495    | 3.2145   | 0.776170478 |
| Pgrmc2        | 17.353   | 22.3615  | 0.776021287 |
| Rit2          | 169.3665 | 218.2995 | 0.775844654 |
| Gemin5        | 3.478    | 4.483    | 0.775819764 |
| Tmem65        | 54.1105  | 69.769   | 0.775566512 |
| Cav2          | 2.7735   | 3.5765   | 0.77547882  |
| Itpr2         | 1.427    | 1.8405   | 0.77533279  |
| Tomm34        | 29.3575  | 37.869   | 0.775238322 |
| Smarca2       | 164.313  | 211.994  | 0.775083257 |
| Tmem134       | 2.8975   | 3.7395   | 0.774836208 |
| Cog5          | 9.889    | 12.7645  | 0.774726781 |
| Tnfaip811     | 1.131    | 1.4605   | 0.774392331 |
| Tbccd1        | 3.6165   | 4.6705   | 0.77432823  |
| Fbxo10        | 12.3675  | 15.974   | 0.774226869 |
| Bpnt1         | 53.4265  | 69.0115  | 0.774168073 |
| 3830406C13Rik | 6.8585   | 8.862    | 0.773922365 |
| Cpne4         | 9.819    | 12.69    | 0.773758865 |
| Shc3          | 6.884    | 8.8975   | 0.773700478 |
| Cxxc1         | 22.2755  | 28.792   | 0.773669769 |
| Grem2         | 5.825    | 7.531    | 0.773469659 |
| Med1          | 25.7075  | 33.24    | 0.773390493 |
| Zfp334        | 10.2155  | 13.2135  | 0.773110834 |
| Haus1         | 6.007    | 7.77     | 0.773101673 |
| Tmcc3         | 9.1025   | 11.7745  | 0.77306892  |
| Ugp2          | 10.942   | 14.155   | 0.77301307  |
| Zfp512        | 14.8885  | 19.261   | 0.772986865 |
| Smc1a         | 20.7195  | 26.813   | 0.772740835 |
| Bmi1          | 7.055    | 9.13     | 0.772727273 |
| Cryz11        | 22.4935  | 29.112   | 0.772653888 |
| Rsph3b        | 11.191   | 14.485   | 0.772592337 |
| Brwd1         | 26.4755  | 34.27    | 0.772556172 |
| Fbxw17        | 2.3825   | 3.0845   | 0.772410439 |
| Zmiz1         | 49.6415  | 64.2805  | 0.77226375  |
| Ywhaz         | 913.1835 | 1182.914 | 0.771977929 |
| Gm15710       | 104.359  | 135.246  | 0.77162356  |
| Mfap2         | 1.299    | 1.6835   | 0.771606772 |
| Pcdhga11      | 2.322    | 3.0095   | 0.771556737 |

|               |          |         |             |
|---------------|----------|---------|-------------|
| Megf10        | 1.141    | 1.479   | 0.771467208 |
| Ubap2l        | 85.7885  | 111.223 | 0.771319781 |
| Grb14         | 9.8465   | 12.7665 | 0.771276387 |
| Adrbk1        | 22.16    | 28.7385 | 0.771091045 |
| Capn7         | 8.4255   | 10.927  | 0.771071657 |
| Pld2          | 1.6265   | 2.1095  | 0.77103579  |
| Zfp846        | 3.5795   | 4.6425  | 0.771028541 |
| Cbx3          | 91.6745  | 118.944 | 0.770736649 |
| Auts2         | 19.342   | 25.097  | 0.770689724 |
| BC027231      | 3.715    | 4.8205  | 0.770666943 |
| Qpctl         | 3.974    | 5.157   | 0.770603064 |
| Kdm6b         | 8.1525   | 10.58   | 0.770557656 |
| Syt12         | 4.8895   | 6.346   | 0.770485345 |
| Zfp760        | 2.0265   | 2.6305  | 0.770385858 |
| Slc27a4       | 5.814    | 7.547   | 0.770372333 |
| Cic           | 14.818   | 19.2385 | 0.770226369 |
| Clu           | 65.572   | 85.1395 | 0.770171307 |
| Dleu7         | 4.355    | 5.655   | 0.770114943 |
| Opa3          | 15.413   | 20.014  | 0.770110922 |
| Chm           | 8.2005   | 10.649  | 0.770072307 |
| Gosr2         | 26.214   | 34.0415 | 0.770060074 |
| Zdhhc2        | 9.7      | 12.597  | 0.770024609 |
| Tm7sf3        | 6.8285   | 8.868   | 0.770015787 |
| Gm10224       | 9.925    | 12.8915 | 0.769887135 |
| Cap2          | 45.2605  | 58.79   | 0.769867324 |
| BC057022      | 10.111   | 13.1335 | 0.769863327 |
| Def8          | 6.2635   | 8.136   | 0.769850049 |
| Inpp4a        | 33.982   | 44.1545 | 0.769615781 |
| Dbr1          | 3.2805   | 4.2635  | 0.769438255 |
| Trib2         | 9.9375   | 12.9165 | 0.769364766 |
| 1110067D22Rik | 14.094   | 18.3215 | 0.769260159 |
| Plcx2         | 12.707   | 16.5195 | 0.769212143 |
| Ddx42         | 12.731   | 16.554  | 0.769058838 |
| Atp5b         | 1377.887 | 1791.79 | 0.769000273 |
| Nsun7         | 2.016    | 2.622   | 0.768878719 |
| Blvra         | 7.779    | 10.118  | 0.768827832 |
| Golga7b       | 16.5405  | 21.5165 | 0.768735622 |
| Sgpl1         | 81.718   | 106.324 | 0.768575298 |
| Gpr61         | 1.4205   | 1.8485  | 0.768460914 |
| Arhgef6       | 4.235    | 5.512   | 0.768323657 |
| Sec23b        | 8.0095   | 10.427  | 0.768149995 |
| Pcdh17        | 32.6255  | 42.474  | 0.768128738 |
| Hirip3        | 11.5085  | 14.9855 | 0.76797571  |
| Vprbp         | 9.02     | 11.7465 | 0.767888307 |
| Rprd2         | 13.5535  | 17.652  | 0.767816678 |
| Dock4         | 5.0015   | 6.5145  | 0.767748868 |
| Tnip2         | 2.462    | 3.2075  | 0.767575994 |
| Xpc           | 2.4785   | 3.229   | 0.767575101 |
| Mib1          | 10.377   | 13.5215 | 0.76744444  |
| Serpine2      | 36.0905  | 47.0275 | 0.767433948 |
| Trnt1         | 11.5005  | 14.988  | 0.767313851 |
| Kctd20        | 5.881    | 7.6645  | 0.767303803 |
| Actr1a        | 55.857   | 72.8055 | 0.767208521 |
| Zfp869        | 6.646    | 8.663   | 0.767170726 |
| Nupl2         | 3.4835   | 4.5415  | 0.767037322 |

|               |          |          |             |
|---------------|----------|----------|-------------|
| Nol9          | 3.802    | 4.9595   | 0.766609537 |
| Dmx11         | 4.2655   | 5.5645   | 0.766555845 |
| Slc6a17       | 51.81    | 67.601   | 0.766408781 |
| Npr2          | 3.11     | 4.0595   | 0.7661042   |
| Tspyl3        | 11.2705  | 14.7125  | 0.766049278 |
| Trp53         | 21.721   | 28.3555  | 0.766024228 |
| Vps16         | 8.3495   | 10.9005  | 0.765974038 |
| Ldha          | 126.8175 | 165.5955 | 0.76582697  |
| Zfp52         | 1.4425   | 1.8845   | 0.765455028 |
| Pdcd4         | 57.8695  | 75.6125  | 0.765343032 |
| Zswim5        | 3.5355   | 4.62     | 0.76525974  |
| Rnf44         | 36.5715  | 47.7985  | 0.765118152 |
| Ipo7          | 6.984    | 9.1285   | 0.765076409 |
| Mtm1          | 1.286    | 1.681    | 0.765020821 |
| Gtf3c4        | 6.7895   | 8.881    | 0.764497241 |
| Rere          | 43.8065  | 57.304   | 0.764457979 |
| Rnf113a1      | 4.8025   | 6.283    | 0.764364157 |
| Pdha1         | 28.123   | 36.7935  | 0.764346963 |
| Tsn           | 32.9635  | 43.135   | 0.76419381  |
| Chl1          | 22.077   | 28.901   | 0.763883603 |
| Zyx           | 7.6345   | 9.9955   | 0.763793707 |
| Zfp830        | 7.998    | 10.472   | 0.763750955 |
| Hsph1         | 104.769  | 137.18   | 0.76373378  |
| Rap1gds1      | 46.149   | 60.4275  | 0.763708576 |
| Ogdh          | 55.483   | 72.65    | 0.763702684 |
| LOC100504663  | 7.4595   | 9.7685   | 0.763627988 |
| Arfgef2       | 12.076   | 15.816   | 0.763530602 |
| Alg9          | 3.3805   | 4.4275   | 0.763523433 |
| Adnp          | 36.5895  | 47.9265  | 0.763450283 |
| Clpb          | 4.3085   | 5.644    | 0.763377038 |
| Kirrel3       | 6.1205   | 8.0185   | 0.763297375 |
| LOC100504442  | 5.714    | 7.4865   | 0.7632405   |
| Fam70a        | 40.714   | 53.357   | 0.763048897 |
| Prrt2         | 110.754  | 145.23   | 0.762611031 |
| Crabp1        | 1.9865   | 2.605    | 0.762571977 |
| Dnajb9        | 15.063   | 19.7595  | 0.76231686  |
| Ctsl          | 29.8685  | 39.1815  | 0.762311295 |
| Lrrc47        | 58.3005  | 76.4865  | 0.762232551 |
| Pdyn          | 5.5345   | 7.2615   | 0.76217035  |
| Suz12         | 10.85    | 14.2365  | 0.762125522 |
| Ankrd34b      | 23.683   | 31.0755  | 0.762111631 |
| Spata5        | 4.793    | 6.2895   | 0.762063757 |
| Zbtb25        | 6.953    | 9.1245   | 0.762014357 |
| Fam181b       | 4.8175   | 6.3225   | 0.76196125  |
| 2610030H06Rik | 7.829    | 10.275   | 0.761946472 |
| Gosr1         | 12.1195  | 15.907   | 0.761897278 |
| Tmem57        | 15.1315  | 19.8635  | 0.761774108 |
| Cdc5l         | 20.5835  | 27.024   | 0.761674808 |
| Dir2          | 7.8955   | 10.3665  | 0.761636039 |
| Rbm18         | 15.7715  | 20.7075  | 0.761632259 |
| Pomt2         | 2.203    | 2.8925   | 0.761624892 |
| Repin1        | 10.477   | 13.757   | 0.761575925 |
| Nup133        | 4.3575   | 5.7235   | 0.761334848 |
| Med14         | 27.9925  | 36.7685  | 0.761317432 |
| Srsf9         | 11.095   | 14.574   | 0.761287224 |



|               |          |          |             |
|---------------|----------|----------|-------------|
| Fdxacb1       | 1.12     | 1.4715   | 0.761128101 |
| S1pr3         | 1.1275   | 1.4815   | 0.761052987 |
| Slc44a2       | 5.1655   | 6.789    | 0.760863161 |
| Nudt9         | 26.507   | 34.8465  | 0.760678978 |
| Klf8          | 1.881    | 2.473    | 0.760614638 |
| Ppp3r1        | 56.8595  | 74.7555  | 0.760606243 |
| Gmeb2         | 1.6525   | 2.173    | 0.760469397 |
| Nup188        | 2.332    | 3.0675   | 0.760228199 |
| Acss2         | 4.331    | 5.6975   | 0.760157964 |
| Capns1        | 325.1535 | 427.7745 | 0.760104915 |
| Zfp704        | 6.0135   | 7.9115   | 0.760096063 |
| Cadm1         | 31.08    | 40.8965  | 0.759967234 |
| LOC100503563  | 23.0615  | 30.347   | 0.759926846 |
| Tmbim6        | 64.9655  | 85.506   | 0.759777092 |
| Drp2          | 5.589    | 7.3565   | 0.759736288 |
| Rtf1          | 51.181   | 67.3805  | 0.759581778 |
| 4732471D19Rik | 4.3105   | 5.676    | 0.759425652 |
| Eif4b         | 86.264   | 113.6115 | 0.759289333 |
| Dazap1        | 9.9985   | 13.169   | 0.759245197 |
| Kcnt1         | 4.4605   | 5.875    | 0.759234043 |
| Saa4          | 2.895    | 3.8145   | 0.758946127 |
| Paxip1        | 20.966   | 27.6275  | 0.758881549 |
| No14          | 12.969   | 17.0905  | 0.758842632 |
| Tmtc2         | 1.441    | 1.899    | 0.758820432 |
| 9430015G10Rik | 2.7385   | 3.609    | 0.758797451 |
| 2210021J22Rik | 12.183   | 16.0565  | 0.758758135 |
| E130303B06Rik | 2.226    | 2.934    | 0.758691207 |
| Txndc12       | 18.7475  | 24.7115  | 0.758654877 |
| Gdf11         | 1.5205   | 2.0045   | 0.758543278 |
| Gspt2         | 6.826    | 9        | 0.758444444 |
| Tmem108       | 7.2555   | 9.57     | 0.75815047  |
| Tra2a         | 13.896   | 18.33    | 0.758101473 |
| Srsf7         | 18.266   | 24.0965  | 0.758035399 |
| Slc25a40      | 1.385    | 1.8275   | 0.757865937 |
| Kras          | 28.2525  | 37.2805  | 0.757835866 |
| Lamp1         | 73.591   | 97.1285  | 0.75766639  |
| Sos1          | 19.246   | 25.411   | 0.757388533 |
| Gbe1          | 2.4515   | 3.237    | 0.75733704  |
| Cry2          | 28.652   | 37.8335  | 0.75731825  |
| 1200011M11Rik | 7.3795   | 9.7475   | 0.757065914 |
| Gm8759        | 797.1805 | 1053.203 | 0.756910586 |
| Khyn          | 3.072    | 4.059    | 0.756836659 |
| Gabrb3        | 52.8195  | 69.805   | 0.756672158 |
| Mical3        | 7.929    | 10.479   | 0.756656169 |
| Adck4         | 3.526    | 4.661    | 0.756490024 |
| BC030476      | 1.483    | 1.9605   | 0.756439684 |
| Riok3         | 13.5845  | 17.9695  | 0.755975403 |
| Nsmce2        | 23.2635  | 30.774   | 0.755946578 |
| Adarb2        | 6.0415   | 7.993    | 0.755848868 |
| Nars          | 88.4155  | 116.997  | 0.755707411 |
| Bag3          | 7.773    | 10.2865  | 0.75565061  |
| Tmem25        | 5.024    | 6.649    | 0.755602346 |
| P4ha2         | 2.2225   | 2.942    | 0.755438477 |
| Cpt1c         | 5.6895   | 7.5315   | 0.755427206 |
| 2510039O18Rik | 4.6545   | 6.1625   | 0.755294118 |

|               |         |          |             |
|---------------|---------|----------|-------------|
| Setd1b        | 5.972   | 7.9075   | 0.755232374 |
| Med7          | 4.426   | 5.861    | 0.755161235 |
| Scml4         | 3.7825  | 5.0095   | 0.755065376 |
| Dock10        | 8.836   | 11.7025  | 0.755052339 |
| Tmem179       | 39.851  | 52.7835  | 0.754989722 |
| Zcchc3        | 15.6385 | 20.714   | 0.754972482 |
| Clcn5         | 6.7445  | 8.9335   | 0.754967258 |
| Slc36a4       | 15.86   | 21.0115  | 0.754824739 |
| Omg           | 52.9425 | 70.14    | 0.754811805 |
| Gucy1a3       | 12.1495 | 16.103   | 0.754486742 |
| Cited2        | 17.995  | 23.8545  | 0.754365005 |
| D15Erttd621e  | 13.363  | 17.7145  | 0.754353778 |
| Pikfyve       | 5.021   | 6.658    | 0.754130369 |
| Dlst          | 35.0695 | 46.511   | 0.754004429 |
| 2810055F11Rik | 3.7375  | 4.9575   | 0.75390822  |
| Opa1          | 57.5845 | 76.385   | 0.753871833 |
| Scarb2        | 10.11   | 13.411   | 0.753858773 |
| Zfp354b       | 3.5535  | 4.7155   | 0.753578624 |
| Nfkbia        | 1.8405  | 2.4425   | 0.753531218 |
| Gpn3          | 18.1125 | 24.0405  | 0.75341611  |
| R3hcc1        | 12.831  | 17.0335  | 0.753280301 |
| Tanc2         | 29.324  | 38.9305  | 0.753239748 |
| Pcsk6         | 1.007   | 1.337    | 0.753178758 |
| 4931406P16Rik | 7.5695  | 10.0505  | 0.75314661  |
| Gm8457        | 1.9125  | 2.5395   | 0.753101004 |
| Pcsk7         | 2.9615  | 3.9325   | 0.75308328  |
| Snw1          | 17.272  | 22.939   | 0.752953485 |
| Slc23a2       | 13.5715 | 18.0265  | 0.752863839 |
| Gins4         | 13.6215 | 18.0935  | 0.752839417 |
| Gramd1b       | 17.1105 | 22.732   | 0.752705437 |
| Mrrf          | 9.0725  | 12.054   | 0.75265472  |
| Tasp1         | 11.913  | 15.8295  | 0.752582204 |
| Atp8a1        | 19.001  | 25.255   | 0.752365868 |
| Pnmal2        | 68.8435 | 91.5145  | 0.752268766 |
| Cops2         | 32.778  | 43.5825  | 0.752090862 |
| Pccb          | 12.364  | 16.44    | 0.752068127 |
| M6pr          | 20.85   | 27.7285  | 0.751933931 |
| Hmbox1        | 10.0505 | 13.3665  | 0.751917106 |
| Asb13         | 10.3865 | 13.8135  | 0.751909364 |
| Camk2b        | 125.896 | 167.4465 | 0.751858056 |
| Dennd4a       | 6.7485  | 8.977    | 0.751754484 |
| Dhrs1         | 56.839  | 75.623   | 0.75160996  |
| Wasf3         | 68.008  | 90.4835  | 0.751606647 |
| Brms1l        | 18.995  | 25.273   | 0.751592609 |
| Inpp5e        | 13.311  | 17.7205  | 0.751163906 |
| Ss18l1        | 35.081  | 46.707   | 0.751086561 |
| C2cd3         | 4.599   | 6.1235   | 0.751041071 |
| Tor1b         | 4.2465  | 5.656    | 0.750795615 |
| Csrnp2        | 8.242   | 10.978   | 0.750774276 |
| Siae          | 2.777   | 3.699    | 0.750743444 |
| Qsox1         | 1.823   | 2.4285   | 0.750669137 |
| Dock9         | 7.2     | 9.593    | 0.750547274 |
| Hadhb         | 38.956  | 51.9075  | 0.75048885  |
| Atmin         | 31.465  | 41.929   | 0.75043526  |
| Actr3         | 50.9995 | 67.964   | 0.750389912 |

|               |          |          |             |
|---------------|----------|----------|-------------|
| Strap         | 28.9425  | 38.5745  | 0.750301365 |
| Akap17b       | 3.856    | 5.14     | 0.750194553 |
| Actr1b        | 169.5055 | 225.9965 | 0.750035952 |
| Pcdhb5        | 1.587    | 2.116    | 0.75        |
| Scn4b         | 1.5765   | 2.102    | 0.75        |
| Dr1           | 10.0305  | 13.3755  | 0.749915891 |
| Zfp59         | 1.931    | 2.575    | 0.749902913 |
| Znf512b       | 5.745    | 7.665    | 0.749510763 |
| Dgkk          | 36.388   | 48.562   | 0.74931016  |
| Anp32e        | 17.8515  | 23.8305  | 0.74910304  |
| D11Bwg0517e   | 63.944   | 85.361   | 0.749100877 |
| Panx2         | 12.508   | 16.6995  | 0.749004461 |
| Hmg20a        | 31.952   | 42.6705  | 0.748807724 |
| Dagla         | 5.843    | 7.8045   | 0.748670639 |
| Agpat4        | 33.254   | 44.418   | 0.748660453 |
| Esco1         | 3.118    | 4.165    | 0.748619448 |
| Cacnb2        | 32.952   | 44.0355  | 0.748305345 |
| Anks1b        | 41.8675  | 55.9535  | 0.748255248 |
| Rad21         | 28.055   | 37.497   | 0.748193189 |
| Srcin1        | 10.508   | 14.045   | 0.748166607 |
| Prkcdbp       | 6.7645   | 9.042    | 0.748119885 |
| Gtf2b         | 23.881   | 31.9295  | 0.747929031 |
| 1500035N22Rik | 4.404    | 5.89     | 0.74770798  |
| Ghr           | 3.348    | 4.478    | 0.747655203 |
| Orc2l         | 4.0745   | 5.45     | 0.747614679 |
| Map3k12       | 15.852   | 21.204   | 0.747594793 |
| Rnf220        | 85.6425  | 114.5865 | 0.747404799 |
| Aktip         | 38.109   | 50.99    | 0.74738184  |
| Cdnf          | 2.6105   | 3.493    | 0.747351847 |
| Gon4l         | 19.8735  | 26.592   | 0.747348827 |
| Fgf14         | 25.252   | 33.791   | 0.747299577 |
| Eif4e2        | 32.3825  | 43.3365  | 0.747233856 |
| Vps13c        | 5.3875   | 7.21     | 0.747226075 |
| BC067068      | 2.146    | 2.872    | 0.747214485 |
| Sdc3          | 25.4535  | 34.08    | 0.746875    |
| Ung           | 4.2435   | 5.682    | 0.746832101 |
| Kdsr          | 6.184    | 8.2805   | 0.746814806 |
| Bend6         | 61.9945  | 83.019   | 0.746750744 |
| Slc12a9       | 2.338    | 3.131    | 0.746726286 |
| Klf9          | 24.6865  | 33.065   | 0.746605172 |
| Csnk1g3       | 16.567   | 22.195   | 0.746429376 |
| Ppt1          | 15.827   | 21.2045  | 0.74639817  |
| Tmem199       | 9.903    | 13.2705  | 0.746241664 |
| 2410042D21Rik | 3.8675   | 5.183    | 0.746189466 |
| Acin1         | 21.5435  | 28.873   | 0.746146919 |
| Prkar2a       | 26.496   | 35.512   | 0.74611399  |
| Syt1          | 113.427  | 152.075  | 0.745862239 |
| Mtap1a        | 105.611  | 141.598  | 0.74585093  |
| Napg          | 43.286   | 58.0405  | 0.745789578 |
| Smarcal1      | 15.8825  | 21.2975  | 0.745744806 |
| Tiparp        | 3.002    | 4.0265   | 0.745560661 |
| Slc8a1        | 16.979   | 22.7735  | 0.745559532 |
| Ephb6         | 1.2435   | 1.668    | 0.745503597 |
| Ccdc148       | 5.0655   | 6.795    | 0.745474614 |
| Dnttip2       | 17.9445  | 24.077   | 0.745296341 |

|               |         |          |             |
|---------------|---------|----------|-------------|
| Sidt2         | 4.057   | 5.4435   | 0.745292551 |
| Rbm24         | 4.1715  | 5.598    | 0.745176849 |
| 2810008M24Rik | 8.9925  | 12.068   | 0.745152469 |
| 5730528L13Rik | 5.3605  | 7.1945   | 0.74508305  |
| 2310037I24Rik | 9.7605  | 13.1     | 0.745076336 |
| LOC100504354  | 1.751   | 2.3505   | 0.744947883 |
| Ip6k1         | 29.8695 | 40.0975  | 0.744921753 |
| Blmh          | 25.449  | 34.164   | 0.74490692  |
| Mlst8         | 3.1955  | 4.29     | 0.744871795 |
| Wdr12         | 8.2     | 11.0115  | 0.744676021 |
| Klraql        | 10.867  | 14.5935  | 0.744646589 |
| Pcgf5         | 6.0095  | 8.0705   | 0.744625488 |
| D3Bwg0562e    | 12.398  | 16.651   | 0.744579905 |
| Htr1d         | 1.326   | 1.781    | 0.744525547 |
| 1810013D10Rik | 11.4305 | 15.353   | 0.744512473 |
| Mthfd2        | 4.46    | 5.991    | 0.744450008 |
| Elavl4        | 48.5345 | 65.198   | 0.744417007 |
| Ino80b        | 3.523   | 4.733    | 0.744348194 |
| Ace           | 3.632   | 4.8795   | 0.744338559 |
| Smc3          | 20.5665 | 27.6315  | 0.744313555 |
| Ehd4          | 6.299   | 8.4635   | 0.744254741 |
| Rnf216        | 11.0885 | 14.9005  | 0.744169659 |
| Nab1          | 5.715   | 7.6805   | 0.744092181 |
| Pcdhga12      | 2.9385  | 3.9495   | 0.74401823  |
| 2410016O06Rik | 3.7     | 4.973    | 0.744017696 |
| Csnk1d        | 36.5755 | 49.166   | 0.743918562 |
| Supt3h        | 6.2165  | 8.362    | 0.743422626 |
| Ephx3         | 1.836   | 2.47     | 0.743319838 |
| Ssh2          | 9.1975  | 12.374   | 0.743292387 |
| Arf2          | 18.5295 | 24.9315  | 0.743216413 |
| Pkp4          | 68.6975 | 92.4465  | 0.743105472 |
| Dpf2          | 27.9435 | 37.605   | 0.743079378 |
| Mrs2          | 6.7055  | 9.0245   | 0.743032855 |
| Prkce         | 44.726  | 60.2015  | 0.742938299 |
| Ppargc1a      | 33.3185 | 44.8595  | 0.742730079 |
| Kat5          | 25.378  | 34.1835  | 0.742404961 |
| Trub1         | 7.3985  | 9.966    | 0.742374072 |
| Ankrd13c      | 10.277  | 13.8435  | 0.742370065 |
| Hcn4          | 3.187   | 4.294    | 0.742198416 |
| Gm10493       | 2.3965  | 3.229    | 0.742180242 |
| Fam172a       | 5.4335  | 7.322    | 0.742078667 |
| Bnip3l        | 40.8455 | 55.0465  | 0.742018112 |
| LOC100503085  | 1.057   | 1.4245   | 0.742014742 |
| Zfp828        | 8.9475  | 12.0605  | 0.741884665 |
| Dyrk1a        | 25.331  | 34.151   | 0.741735235 |
| Kctd10        | 13.5615 | 18.285   | 0.741673503 |
| Aip           | 57.8925 | 78.061   | 0.741631545 |
| Golph3l       | 9.2835  | 12.518   | 0.741612079 |
| Arf3          | 671.655 | 905.8755 | 0.741442947 |
| Smad9         | 5.723   | 7.7195   | 0.74136926  |
| Ppm1l         | 4.953   | 6.6815   | 0.741300606 |
| Ehmt1         | 4.606   | 6.214    | 0.741229482 |
| Spata2        | 11.748  | 15.8515  | 0.7411286   |
| Sh3gl2        | 78.3645 | 105.749  | 0.741042468 |
| 4930486G11Rik | 2.046   | 2.7615   | 0.740901684 |

|               |         |          |             |
|---------------|---------|----------|-------------|
| Cpped1        | 14.0305 | 18.9395  | 0.740806251 |
| Cytip1        | 4.3465  | 5.8675   | 0.740775458 |
| Dzip3         | 14.552  | 19.6445  | 0.740767136 |
| Tomm40l       | 9.229   | 12.4625  | 0.740541625 |
| Polr3k        | 11.8375 | 15.9915  | 0.740237001 |
| Sng6          | 12.3405 | 16.6715  | 0.740215338 |
| Mrps5         | 24.336  | 32.877   | 0.740213523 |
| Mum1          | 3.133   | 4.2335   | 0.740049604 |
| Sh2d2a        | 1.6665  | 2.2525   | 0.739844617 |
| Pcdhb18       | 1.2065  | 1.631    | 0.739730227 |
| Lrp3          | 12.6035 | 17.0525  | 0.739099839 |
| Sdcbp         | 40.677  | 55.044   | 0.738990626 |
| Ahctf1        | 4.898   | 6.63     | 0.738763198 |
| Rnh1          | 15.128  | 20.4775  | 0.738762056 |
| Slc29a4       | 4.5275  | 6.1285   | 0.738761524 |
| Tm7sf2        | 1.285   | 1.7395   | 0.738718022 |
| Ube2d3        | 95.121  | 128.7775 | 0.738646114 |
| Kdm5c         | 6.058   | 8.2015   | 0.73864537  |
| Vps33b        | 26.58   | 35.9875  | 0.738589788 |
| Slc25a33      | 10.8675 | 14.7175  | 0.738406659 |
| Sym           | 2.361   | 3.199    | 0.738043138 |
| Dgkb          | 23.57   | 31.9365  | 0.738027022 |
| Cdk5rap3      | 5.2805  | 7.1555   | 0.737963804 |
| Darc          | 23.9    | 32.3945  | 0.737779561 |
| Nup93         | 5.267   | 7.141    | 0.737571769 |
| Trp53rk       | 1.863   | 2.526    | 0.737529691 |
| Nae1          | 13.393  | 18.1605  | 0.737479695 |
| Man1b1        | 3.8635  | 5.239    | 0.737449895 |
| Mnd1          | 1.188   | 1.611    | 0.737430168 |
| Tada3         | 20.9415 | 28.3995  | 0.737389743 |
| AI593442      | 18.7975 | 25.492   | 0.7373882   |
| Arid1a        | 32.308  | 43.816   | 0.737356217 |
| Coq5          | 55.515  | 75.2955  | 0.737295057 |
| Phf2          | 14.0125 | 19.0065  | 0.737247784 |
| Snap29        | 4.827   | 6.5485   | 0.73711537  |
| Cdk9          | 7.5755  | 10.2795  | 0.736952186 |
| Rhob          | 86.569  | 117.4865 | 0.736842105 |
| Taf1b         | 8.5615  | 11.6195  | 0.736821722 |
| Cnm2          | 4.5905  | 6.2305   | 0.73677875  |
| Ralgapb       | 17.1485 | 23.28    | 0.736619416 |
| Adipor1       | 19.5655 | 26.567   | 0.736458765 |
| Dlgap2        | 8.046   | 10.9255  | 0.736442268 |
| Phyhd1        | 3.707   | 5.034    | 0.736392531 |
| Acnat1        | 10.7065 | 14.543   | 0.736196108 |
| Taf9b         | 26.312  | 35.7405  | 0.736195632 |
| Slc7a5        | 7.091   | 9.633    | 0.736115437 |
| Otub2         | 2.281   | 3.0995   | 0.735925149 |
| Mmgt1         | 3.8065  | 5.173    | 0.735839938 |
| Plekha6       | 18.6925 | 25.4135  | 0.735534263 |
| Gm10554       | 2.1775  | 2.9605   | 0.735517649 |
| 1300001I01Rik | 18.6845 | 25.404   | 0.73549441  |
| C630004H02Rik | 29.8945 | 40.655   | 0.735321609 |
| Crtc3         | 4.4825  | 6.0965   | 0.735257935 |
| Flad1         | 4.26    | 5.794    | 0.735243355 |
| 6430704M03Rik | 18.9295 | 25.747   | 0.735211869 |

|          |          |          |             |
|----------|----------|----------|-------------|
| Gga2     | 6.7945   | 9.242    | 0.735176369 |
| Kcnb1    | 12.1435  | 16.5195  | 0.735100941 |
| Lzts2    | 3.8845   | 5.2845   | 0.735074274 |
| Wdr13    | 10.3345  | 14.0615  | 0.734950041 |
| Clip3    | 395.4385 | 538.064  | 0.734928373 |
| Arfgef1  | 12       | 16.3315  | 0.734776352 |
| Ccni     | 48.515   | 66.0295  | 0.734747348 |
| Mamld1   | 30.3725  | 41.3395  | 0.734708935 |
| Wdsub1   | 6.632    | 9.0315   | 0.734318773 |
| Nt5dc3   | 16.6505  | 22.6755  | 0.734294723 |
| Nipa2    | 5.5355   | 7.539    | 0.734248574 |
| Psg23    | 4.2415   | 5.777    | 0.734204604 |
| Sacm11   | 9.9315   | 13.529   | 0.734089733 |
| Nadk     | 5.892    | 8.0295   | 0.733794134 |
| Etohi1   | 19.55    | 26.643   | 0.733776226 |
| Cachd1   | 3.3345   | 4.5445   | 0.733744086 |
| Arhgef2  | 4.282    | 5.8365   | 0.733658871 |
| Bclaf1   | 32.5275  | 44.3385  | 0.733617511 |
| Adcy5    | 11.075   | 15.097   | 0.733589455 |
| Fam149b  | 18.61    | 25.3685  | 0.733586929 |
| Ostm1    | 10.0725  | 13.7345  | 0.733372165 |
| Ap3b1    | 8.0335   | 10.9545  | 0.733351591 |
| Acs15    | 5.759    | 7.8535   | 0.733303623 |
| Fam160b2 | 22.2     | 30.2815  | 0.733120882 |
| Serbp1   | 49.3565  | 67.3445  | 0.732895782 |
| Ppip5k2  | 4.5975   | 6.2735   | 0.732844505 |
| Gabre    | 4.197    | 5.728    | 0.73271648  |
| Kif21a   | 71.2425  | 97.2355  | 0.732679937 |
| Alg11    | 9.0245   | 12.319   | 0.732567579 |
| Gm5578   | 14.6535  | 20.0035  | 0.732546804 |
| Cyb561d2 | 2.2565   | 3.0805   | 0.732510956 |
| Ywhab    | 372.6545 | 508.7515 | 0.732488258 |
| Wdr43    | 7.5955   | 10.3695  | 0.732484691 |
| Adam11   | 5.286    | 7.217    | 0.732437301 |
| Chd6     | 13.702   | 18.716   | 0.732100876 |
| Plcb4    | 25.4235  | 34.73    | 0.732032825 |
| Kcna2    | 16.682   | 22.7905  | 0.731971655 |
| Nin      | 2.7705   | 3.785    | 0.731968296 |
| Wdr25    | 4.539    | 6.2025   | 0.731801693 |
| Trpv2    | 4.3435   | 5.9365   | 0.731660069 |
| P2ry1    | 2.884    | 3.942    | 0.731608321 |
| Idh3b    | 206.6765 | 282.508  | 0.731577513 |
| Uros     | 3.5845   | 4.9      | 0.731530612 |
| Pdik11   | 4.0285   | 5.507    | 0.731523516 |
| B3gnt2   | 4.8105   | 6.5765   | 0.731468106 |
| Cdk11    | 5.321    | 7.276    | 0.731308411 |
| Fbxo41   | 7.244    | 9.908    | 0.731126363 |
| Eef1b2   | 49.1715  | 67.2545  | 0.731125798 |
| Grin2b   | 14.19    | 19.411   | 0.731028798 |
| Cyfip2   | 98.895   | 135.3065 | 0.730896151 |
| Tcea1    | 35.964   | 49.212   | 0.730797366 |
| Zfp110   | 2.0275   | 2.7745   | 0.7307623   |
| Ubqln1   | 43.7455  | 59.863   | 0.730760236 |
| Aak1     | 27.0665  | 37.041   | 0.730717313 |
| C2cd4c   | 3.43     | 4.6945   | 0.730642241 |

|               |          |          |             |
|---------------|----------|----------|-------------|
| Ift52         | 11.1885  | 15.3175  | 0.73043904  |
| Hspa12a       | 27.5225  | 37.687   | 0.730291612 |
| Pnpla6        | 4.902    | 6.7125   | 0.73027933  |
| Ide           | 7.691    | 10.532   | 0.730250665 |
| Pepd          | 6.075    | 8.3195   | 0.730212152 |
| Mark1         | 10.5565  | 14.458   | 0.730149398 |
| Kcnj9         | 7.5915   | 10.4015  | 0.729846657 |
| Lrsam1        | 4.2255   | 5.79     | 0.729792746 |
| Syp           | 532.838  | 730.125  | 0.729790104 |
| Fam189a1      | 6.8965   | 9.4505   | 0.729749749 |
| Eid1          | 86.9745  | 119.205  | 0.729621241 |
| Pi4k2a        | 20.0725  | 27.512   | 0.729590724 |
| Ampd3         | 6.6945   | 9.1765   | 0.729526508 |
| Ncam1         | 91.1305  | 124.918  | 0.729522567 |
| Akr1e1        | 23.5455  | 32.2765  | 0.729493594 |
| Obfc2a        | 2.518    | 3.452    | 0.729432213 |
| 4930470H14Rik | 46.234   | 63.393   | 0.729323427 |
| Dmxl2         | 13.2925  | 18.227   | 0.729275251 |
| Tbc1d2b       | 4.804    | 6.588    | 0.729204614 |
| Plp2          | 3.1115   | 4.267    | 0.729200844 |
| Cdkl4         | 2.432    | 3.3355   | 0.729126068 |
| Cbln2         | 10.6875  | 14.6595  | 0.729049422 |
| Pus1          | 2.128    | 2.919    | 0.729016787 |
| Brd3          | 25.512   | 35.004   | 0.728830991 |
| Rab36         | 10.1755  | 13.9615  | 0.728825699 |
| Kif2a         | 28.369   | 38.9275  | 0.728765012 |
| 1110008J03Rik | 6.4295   | 8.824    | 0.728637806 |
| Xpo7          | 7.6915   | 10.5565  | 0.72860323  |
| Peg10         | 77.208   | 105.9815 | 0.728504503 |
| Smad1         | 13.949   | 19.1495  | 0.72842633  |
| Znfx1         | 4.729    | 6.494    | 0.728210656 |
| Prmt8         | 15.6815  | 21.5375  | 0.728102147 |
| Efr3a         | 12.2255  | 16.795   | 0.727924978 |
| Bmper         | 1.4645   | 2.0125   | 0.727701863 |
| Ocl           | 20.8055  | 28.5925  | 0.727655854 |
| Pigu          | 7.127    | 9.7945   | 0.727653275 |
| Tnpo3         | 16.865   | 23.1785  | 0.727613953 |
| Ip6k2         | 12.3765  | 17.01    | 0.727601411 |
| Cdc123        | 102.2035 | 140.4815 | 0.727522841 |
| Rpgrip11      | 4.922    | 6.7675   | 0.727299594 |
| Golim4        | 1.708    | 2.3485   | 0.727272727 |
| Stxbp5        | 19.2255  | 26.4355  | 0.727260691 |
| Gmids         | 2.3115   | 3.179    | 0.727115445 |
| Lrig2         | 2.7125   | 3.731    | 0.727016886 |
| Lrrc27        | 11.202   | 15.412   | 0.726836232 |
| Farp1         | 6.4895   | 8.9285   | 0.726829815 |
| Pgm2          | 11.622   | 15.99    | 0.726829268 |
| Gm10778       | 1.8525   | 2.549    | 0.72675559  |
| Gnaq          | 42.5445  | 58.541   | 0.726747066 |
| Ube3b         | 8.1845   | 11.264   | 0.726606889 |
| Inpp5f        | 76.927   | 105.8895 | 0.72648374  |
| Plxna2        | 6.989    | 9.621    | 0.726431764 |
| Fbxl16        | 27.7245  | 38.166   | 0.726418802 |
| Rab12         | 55.877   | 76.9215  | 0.726415892 |
| Eif5          | 50.922   | 70.1135  | 0.726279532 |

|               |         |         |             |
|---------------|---------|---------|-------------|
| Pcdh20        | 2.435   | 3.3535  | 0.726107052 |
| Maob          | 4.5115  | 6.214   | 0.726021886 |
| Ssbp1         | 11.016  | 15.174  | 0.725978648 |
| Tbc1d14       | 10.475  | 14.4335 | 0.725742197 |
| Ranbp6        | 10.7355 | 14.793  | 0.725714865 |
| Scamp5        | 50.5225 | 69.629  | 0.725595657 |
| Pnma2         | 21.194  | 29.211  | 0.725548595 |
| Ube2cbp       | 1.677   | 2.3115  | 0.72550292  |
| Rpp14         | 5.902   | 8.137   | 0.725328745 |
| Rhot2         | 15.5435 | 21.4315 | 0.725264214 |
| Rab21         | 68.6025 | 94.607  | 0.725131333 |
| Pcf11         | 8.6845  | 11.977  | 0.725098105 |
| Klhl15        | 2.499   | 3.4465  | 0.725083418 |
| Pou3f3        | 5.422   | 7.4785  | 0.7250117   |
| Hspa2         | 5.5915  | 7.7125  | 0.724991896 |
| Fam159a       | 1.4865  | 2.0505  | 0.724945135 |
| 1110057K04Rik | 12.3505 | 17.037  | 0.724922228 |
| Eif2c1        | 11.524  | 15.897  | 0.724916651 |
| Fnbp4         | 7.1235  | 9.827   | 0.724890608 |
| Avl9          | 11.9415 | 16.4755 | 0.724803496 |
| Elf2          | 7.1505  | 9.8655  | 0.72479854  |
| 4931428F04Rik | 1.251   | 1.7265  | 0.724587315 |
| Atrnl1        | 2.8925  | 3.992   | 0.724574148 |
| Fam19a1       | 4.1675  | 5.752   | 0.724530598 |
| Msl2          | 11.4405 | 15.793  | 0.724403217 |
| Atpbd4        | 10.7255 | 14.806  | 0.724402269 |
| Smndc1        | 6.5755  | 9.078   | 0.724333554 |
| Dag1          | 13.018  | 17.9765 | 0.724167663 |
| Plcb1         | 17.774  | 24.5455 | 0.724124585 |
| Rmi1          | 11.096  | 15.3235 | 0.724116553 |
| Med23         | 2.818   | 3.892   | 0.724049332 |
| Myo16         | 3.82    | 5.2765  | 0.723964749 |
| Ankrd46       | 34.3385 | 47.4505 | 0.72366993  |
| Uso1          | 25.066  | 34.643  | 0.723551655 |
| Tnrc18        | 2.5315  | 3.5     | 0.723285714 |
| Ankrd35       | 2.882   | 3.985   | 0.723212045 |
| Ccnt1         | 35.653  | 49.3055 | 0.723103913 |
| 1700094D03Rik | 2.048   | 2.8325  | 0.723036187 |
| Cdk17         | 18.199  | 25.1705 | 0.723028943 |
| Etf1          | 19.3165 | 26.719  | 0.722949961 |
| Gnaz          | 50.7705 | 70.23   | 0.722917557 |
| Pcnp          | 58.1095 | 80.394  | 0.722808916 |
| Grm2          | 1.4095  | 1.9505  | 0.722635222 |
| Kif5c         | 54.442  | 75.35   | 0.722521566 |
| Gna11         | 27.3965 | 37.9225 | 0.722433911 |
| Zfp551        | 3.042   | 4.211   | 0.722393731 |
| Bcl9          | 28.4335 | 39.3625 | 0.722349952 |
| Gm9938        | 1.45    | 2.0075  | 0.722291407 |
| Cacna1g       | 3.8075  | 5.273   | 0.72207472  |
| Zfp326        | 7.0525  | 9.7685  | 0.721963454 |
| Baalc         | 42.18   | 58.431  | 0.721877086 |
| Sprn          | 6.3565  | 8.807   | 0.721755422 |
| Ptpn11        | 29.0565 | 40.2655 | 0.721622729 |
| Mobkl3        | 25.7705 | 35.713  | 0.721599978 |
| Sel11         | 26.7315 | 37.051  | 0.721478503 |



|              |         |          |             |
|--------------|---------|----------|-------------|
| Trpc7        | 10.8195 | 14.999   | 0.72134809  |
| Hsp90aa1     | 283.759 | 393.401  | 0.721297099 |
| Rbm11        | 6.009   | 8.3325   | 0.721152115 |
| Tcfe3        | 10.4325 | 14.47    | 0.72097443  |
| Mnt          | 10.5095 | 14.577   | 0.720964533 |
| LOC100503385 | 2.2475  | 3.1175   | 0.720930233 |
| Pdk3         | 5.76    | 7.9905   | 0.720856017 |
| Kcnj12       | 3.2355  | 4.489    | 0.720761862 |
| Nlrp1a       | 1.515   | 2.102    | 0.72074215  |
| Casp8ap2     | 2.722   | 3.7775   | 0.720582396 |
| Agpat3       | 15.1625 | 21.043   | 0.720548401 |
| Casz1        | 1.5115  | 2.098    | 0.720448046 |
| Ptbp2        | 24.586  | 34.134   | 0.720278901 |
| Unc5d        | 7.737   | 10.752   | 0.719587054 |
| Zdhhc17      | 15.4905 | 21.5305  | 0.719467732 |
| Syt2         | 9.672   | 13.445   | 0.719375232 |
| Rabggtb      | 39.4075 | 54.787   | 0.719285597 |
| Arih2        | 8.374   | 11.6425  | 0.719261327 |
| Paics        | 39.2405 | 54.5685  | 0.719105345 |
| Fbxo42       | 6.109   | 8.4955   | 0.719086575 |
| Traf7        | 3.472   | 4.829    | 0.718989439 |
| Tymp         | 3.2645  | 4.5405   | 0.718973681 |
| Tspyl5       | 7.427   | 10.3315  | 0.718869477 |
| Ppp3ca       | 126.511 | 175.9905 | 0.718851302 |
| Nus1         | 11.3315 | 15.7655  | 0.718752973 |
| Atp2b1       | 22.0945 | 30.745   | 0.718637177 |
| Armc8        | 22.128  | 30.795   | 0.718558208 |
| Lrfn2        | 1.313   | 1.8275   | 0.718467852 |
| Fanc1        | 2.6305  | 3.6625   | 0.718225256 |
| Dscr3        | 7.615   | 10.603   | 0.718192964 |
| Klhl18       | 6.763   | 9.4175   | 0.718131139 |
| Sec22c       | 4.906   | 6.8325   | 0.718038785 |
| H2-DMa       | 7.739   | 10.7785  | 0.718003433 |
| Tgfb1i1      | 3.136   | 4.3685   | 0.717866545 |
| Mtrf11       | 2.546   | 3.547    | 0.717789681 |
| Fyn          | 20.8635 | 29.068   | 0.717748039 |
| Zbtb43       | 3.2965  | 4.5935   | 0.717644498 |
| Zbtb2        | 5.766   | 8.0355   | 0.717565802 |
| Acs13        | 14.157  | 19.736   | 0.717318606 |
| Gpr153       | 2.347   | 3.272    | 0.717298289 |
| Fbx15        | 11.6335 | 16.2205  | 0.717209704 |
| Ube2e3       | 22.908  | 31.9465  | 0.717073858 |
| Elfn2        | 17.909  | 24.98    | 0.716933547 |
| Plaa         | 6.6375  | 9.2595   | 0.716831362 |
| Fam118a      | 5.3415  | 7.453    | 0.716691265 |
| Gas7         | 32.51   | 45.3625  | 0.716671259 |
| Crebzf       | 4.0115  | 5.598    | 0.716595213 |
| Osgin2       | 3.909   | 5.455    | 0.716590284 |
| D10Wsu102e   | 12.235  | 17.074   | 0.716586623 |
| Atl2         | 8.135   | 11.353   | 0.716550691 |
| Nptxr        | 20.0475 | 27.9785  | 0.716532337 |
| Arf6         | 9.4105  | 13.1355  | 0.716417342 |
| Zfp709       | 1.217   | 1.699    | 0.716303708 |
| Shisa9       | 18.7885 | 26.231   | 0.716270825 |
| Nrg3         | 9.267   | 12.9385  | 0.716234494 |

|               |         |          |             |
|---------------|---------|----------|-------------|
| Neurl4        | 5.6715  | 7.9185   | 0.716234135 |
| Exoc4         | 14.895  | 20.8005  | 0.716088556 |
| Pdzd11        | 35.6825 | 49.846   | 0.715854833 |
| Sec11a        | 9.7475  | 13.6195  | 0.715701751 |
| 2610018G03Rik | 2.4795  | 3.4645   | 0.715687689 |
| BC066028      | 19.2255 | 26.8685  | 0.715540503 |
| 1190005F20Rik | 9.7315  | 13.6015  | 0.715472558 |
| Lgi2          | 4.5555  | 6.368    | 0.715373744 |
| Slc2a13       | 8.08    | 11.296   | 0.71529745  |
| Mtap          | 4.466   | 6.2445   | 0.715189367 |
| Zfp804a       | 9.58    | 13.3965  | 0.715112156 |
| Slc38a7       | 1.958   | 2.7385   | 0.714989958 |
| Gm5292        | 2.206   | 3.0855   | 0.714957057 |
| Scn5a         | 2.395   | 3.35     | 0.714925373 |
| Zfp248        | 3.9725  | 5.5575   | 0.71479982  |
| Supt16h       | 16.031  | 22.4335  | 0.714600932 |
| Lman1         | 5.7355  | 8.0275   | 0.71448147  |
| Sptlc2        | 7.041   | 9.856    | 0.714387175 |
| 4930506M07Rik | 11.6865 | 16.362   | 0.714246425 |
| Usp32         | 19.287  | 27.007   | 0.714148184 |
| Rbbp8         | 1.2325  | 1.726    | 0.714078795 |
| Klhl32        | 1.699   | 2.3795   | 0.714015549 |
| Pdcd11        | 4.1115  | 5.7585   | 0.713988018 |
| Pyroxd1       | 7.0965  | 9.9395   | 0.713969516 |
| Ubap1         | 19.178  | 26.863   | 0.713918773 |
| Urod          | 16.5535 | 23.187   | 0.713912968 |
| Efnb2         | 6.047   | 8.471    | 0.713847244 |
| Epb4.113      | 66.2965 | 92.8865  | 0.713736657 |
| Arhgap21      | 20.961  | 29.372   | 0.71363884  |
| Txn11         | 51.998  | 72.866   | 0.713611286 |
| Sox11         | 6.126   | 8.586    | 0.713487072 |
| Gm7609        | 3.4545  | 4.8425   | 0.713371193 |
| Ube2g2        | 15.063  | 21.116   | 0.713345331 |
| Rps4x         | 213.507 | 299.3345 | 0.713272276 |
| Stam          | 19.7985 | 27.7575  | 0.713266685 |
| Tbrg4         | 6.3455  | 8.898    | 0.713137784 |
| Sms           | 35.03   | 49.125   | 0.71307888  |
| Atp2c1        | 11.2785 | 15.818   | 0.713016816 |
| Usp16         | 7.739   | 10.86    | 0.712615101 |
| Pcid2         | 5.816   | 8.1625   | 0.712526799 |
| Mllt6         | 6.323   | 8.879    | 0.712129744 |
| Rtn2          | 6.784   | 9.527    | 0.712081453 |
| Hrh1          | 1.3745  | 1.9305   | 0.711991712 |
| Zxdb          | 3.5475  | 4.984    | 0.711777689 |
| Trerf1        | 8.52    | 11.9735  | 0.711571387 |
| Acbd4         | 6.3745  | 8.959    | 0.711519143 |
| Hps5          | 1.601   | 2.2505   | 0.711397467 |
| Porcn         | 9.469   | 13.311   | 0.711366539 |
| Zfp784        | 3.475   | 4.886    | 0.711215718 |
| Zic3          | 2.804   | 3.943    | 0.711133655 |
| Fdps          | 10.895  | 15.3225  | 0.711045848 |
| Gm4455        | 5.9165  | 8.3225   | 0.710904175 |
| Npas3         | 4.488   | 6.3135   | 0.710857686 |
| Lypla1        | 7.1385  | 10.0425  | 0.710828977 |
| Pea15a        | 116.787 | 164.324  | 0.710711765 |

|               |          |          |             |
|---------------|----------|----------|-------------|
| Api5          | 12.491   | 17.5795  | 0.710543531 |
| 6230409E13Rik | 18.6745  | 26.287   | 0.710408187 |
| Gmip          | 1.8615   | 2.621    | 0.710225105 |
| Bod11         | 12.9715  | 18.265   | 0.710183411 |
| Tacc2         | 8.6425   | 12.1715  | 0.710060387 |
| Lrrc41        | 10.3395  | 14.562   | 0.710032963 |
| Cdc23         | 9.395    | 13.2325  | 0.709994332 |
| Ccnj          | 2.006    | 2.826    | 0.709837226 |
| Oxr1          | 25.138   | 35.4145  | 0.709822248 |
| Copg2         | 15.435   | 21.7495  | 0.709671487 |
| Edc3          | 3.7875   | 5.3375   | 0.709601874 |
| 1700013F07Rik | 1.987    | 2.8005   | 0.709516158 |
| Blvrb         | 2.7625   | 3.8935   | 0.70951586  |
| Sec14l2       | 2.6915   | 3.7935   | 0.709503097 |
| Lmbrd1        | 12.9305  | 18.225   | 0.709492455 |
| Ppox          | 1.249    | 1.7605   | 0.70945754  |
| 5830433M19Rik | 1.8365   | 2.589    | 0.709347238 |
| Tmem33        | 7.3965   | 10.4275  | 0.709326301 |
| Zfp397        | 3.428    | 4.833    | 0.709290296 |
| Cd81          | 215.682  | 304.1305 | 0.709175831 |
| BC003267      | 2.8395   | 4.004    | 0.709165834 |
| Zfp382        | 10.054   | 14.18    | 0.709026798 |
| Fbxl4         | 4.831    | 6.814    | 0.708981509 |
| Fjx1          | 4.256    | 6.003    | 0.708978844 |
| D6Wsu163e     | 10.3265  | 14.566   | 0.708945489 |
| Pigg          | 1.683    | 2.374    | 0.708930076 |
| Ddx20         | 2.373    | 3.3475   | 0.708887229 |
| Erlin1        | 2.945    | 4.1545   | 0.7088699   |
| Fbxl2         | 8.848    | 12.482   | 0.708860759 |
| Larp4         | 9.278    | 13.09    | 0.708785332 |
| Map3k4        | 9.457    | 13.3475  | 0.708522195 |
| Clvs1         | 37.5995  | 53.078   | 0.708382004 |
| Srsf3         | 57.944   | 81.7995  | 0.708366188 |
| Raver1        | 20.235   | 28.566   | 0.708359588 |
| Noslap        | 8.6275   | 12.18    | 0.708333333 |
| Tmem44        | 1.6285   | 2.2995   | 0.708197434 |
| Zfp60         | 10.1805  | 14.379   | 0.708011684 |
| Agbl4         | 3.266    | 4.613    | 0.707999133 |
| Hexim1        | 10.856   | 15.334   | 0.707969219 |
| Gm10791       | 4.1185   | 5.8185   | 0.707828478 |
| Adcyap1r1     | 35.94    | 50.777   | 0.707800776 |
| Usp20         | 9.3975   | 13.2795  | 0.707669716 |
| Alg6          | 1.202    | 1.699    | 0.707474985 |
| Prok2         | 3.1595   | 4.466    | 0.707456337 |
| Ano10         | 1.334    | 1.886    | 0.707317073 |
| Zc3hc1        | 3.2395   | 4.58     | 0.70731441  |
| Pak7          | 3.568    | 5.0445   | 0.707304986 |
| Dcun1d4       | 70.5705  | 99.7815  | 0.707250342 |
| Foxj3         | 30.8555  | 43.628   | 0.707240763 |
| Vamp4         | 39.683   | 56.1155  | 0.707166469 |
| Zfand5        | 20.5165  | 29.015   | 0.707099776 |
| Hs2st1        | 11.1585  | 15.782   | 0.707039665 |
| Lyst          | 1.9125   | 2.705    | 0.70702403  |
| Grin11a       | 120.0485 | 169.8065 | 0.706972348 |
| Sgsm3         | 5.5905   | 7.9085   | 0.706897642 |

|               |         |          |             |
|---------------|---------|----------|-------------|
| Thoc2         | 2.45    | 3.466    | 0.706866705 |
| Gria4         | 11.1395 | 15.759   | 0.706865918 |
| Tlk1          | 13.3825 | 18.9335  | 0.706815961 |
| Zfp689        | 3.8805  | 5.491    | 0.706701876 |
| Agfg2         | 9.382   | 13.277   | 0.706635535 |
| Slc25a44      | 14.795  | 20.94    | 0.706542502 |
| Ap2a2         | 41.6355 | 58.929   | 0.70653668  |
| Nipal2        | 2.023   | 2.8635   | 0.706478086 |
| Acer3         | 2.701   | 3.8235   | 0.706420819 |
| Ccdc47        | 27.0155 | 38.2445  | 0.706389154 |
| Tnk2          | 14.27   | 20.2015  | 0.706383189 |
| Myh14         | 1.18    | 1.6705   | 0.706375337 |
| Dusp4         | 3.345   | 4.736    | 0.70629223  |
| Cep290        | 3.2015  | 4.533    | 0.706265167 |
| Brd2          | 28.2375 | 39.984   | 0.706219988 |
| Lrpap1        | 21.9655 | 31.1295  | 0.705616859 |
| Sfmbt1        | 8.404   | 11.911   | 0.705566283 |
| Fam19a5       | 32.621  | 46.236   | 0.705532486 |
| Sav1          | 2.453   | 3.4775   | 0.705391804 |
| Upf3b         | 15.2805 | 21.6665  | 0.705259271 |
| Mfap1b        | 19.207  | 27.234   | 0.705258133 |
| Ptp4a1        | 27.467  | 38.953   | 0.705131826 |
| Tob1          | 39.007  | 55.319   | 0.705128437 |
| Parp1         | 8.8115  | 12.4965  | 0.705117433 |
| Mgat5b        | 2.0735  | 2.941    | 0.705032302 |
| Mtap6         | 15.475  | 21.9495  | 0.705027449 |
| Tchp          | 2.9835  | 4.232    | 0.704985822 |
| Wsb2          | 39.6165 | 56.2155  | 0.704725565 |
| Ankrd6        | 10.168  | 14.4315  | 0.704569865 |
| Tmem132e      | 1.45    | 2.058    | 0.704567541 |
| Zfp61         | 4.7765  | 6.7795   | 0.704550483 |
| Mbd2          | 13.661  | 19.397   | 0.704284168 |
| Bag5          | 32.202  | 45.735   | 0.704099705 |
| Nr4a1         | 4.0425  | 5.7415   | 0.704084299 |
| Zfp467        | 8.7195  | 12.3845  | 0.704065566 |
| Rprd1b        | 19.452  | 27.6305  | 0.704004633 |
| 1700008O03Rik | 3.0605  | 4.3475   | 0.703967798 |
| Bat1a         | 56.477  | 80.229   | 0.70394745  |
| Nrip3         | 17.178  | 24.405   | 0.703872157 |
| Csmd2         | 3.917   | 5.5655   | 0.703800198 |
| Fig4          | 4.97    | 7.063    | 0.703666997 |
| Lars          | 5.5315  | 7.861    | 0.703663656 |
| Samd5         | 3.1435  | 4.4675   | 0.703637381 |
| Pnma3         | 12.8795 | 18.311   | 0.70337502  |
| Sphkap        | 9.671   | 13.7495  | 0.703371032 |
| Cdk18         | 17.0925 | 24.3085  | 0.703149104 |
| Casc3         | 17.057  | 24.262   | 0.70303355  |
| Trabd         | 4.0985  | 5.8305   | 0.702941429 |
| Glis2         | 2.061   | 2.932    | 0.702933151 |
| Rpf2          | 7.8895  | 11.224   | 0.7029134   |
| Rp2h          | 2.5905  | 3.687    | 0.702603743 |
| 6330416L07Rik | 4.5625  | 6.494    | 0.702571605 |
| Reep5         | 76.4035 | 108.7595 | 0.702499552 |
| Oaz2-ps       | 80.933  | 115.209  | 0.702488521 |
| Mphosph8      | 31.3685 | 44.655   | 0.70246333  |

|               |          |          |             |
|---------------|----------|----------|-------------|
| 9030418K01Rik | 13.8775  | 19.7565  | 0.702427049 |
| Gtf2ird2      | 2.4195   | 3.4445   | 0.702424154 |
| Appbp2        | 12.223   | 17.4045  | 0.702289638 |
| Iars2         | 3.4105   | 4.857    | 0.702182417 |
| Ptpn9         | 7.997    | 11.389   | 0.702168759 |
| Hnrnpu        | 36.2815  | 51.6765  | 0.702088957 |
| Ufd1l         | 56.714   | 80.7925  | 0.701971099 |
| Mgat5         | 8.87     | 12.6375  | 0.701879327 |
| Slc7a14       | 26.6495  | 37.9715  | 0.701829003 |
| Zfp791        | 1.48     | 2.109    | 0.701754386 |
| Trpm3         | 7.095    | 10.1105  | 0.70174571  |
| Rps6kb1       | 10.046   | 14.316   | 0.701732327 |
| Adcy1         | 3.371    | 4.8045   | 0.701633885 |
| Wscd1         | 16.5645  | 23.6085  | 0.701632886 |
| Cldnd1        | 26.873   | 38.318   | 0.701315309 |
| Syn3          | 15.896   | 22.6675  | 0.701268336 |
| Gnai1         | 97.2455  | 138.6755 | 0.701244993 |
| Aimp1         | 20.7465  | 29.601   | 0.700871592 |
| Gemin6        | 2.086    | 2.9765   | 0.700823114 |
| Zfp341        | 1.7065   | 2.435    | 0.700821355 |
| Serpina1a     | 1.9155   | 2.7335   | 0.700749954 |
| Ddx19b        | 3.6635   | 5.2285   | 0.700678971 |
| Ube1y1        | 1.0255   | 1.4645   | 0.700238989 |
| Grm3          | 5.05     | 7.213    | 0.700124775 |
| Kif21b        | 9.181    | 13.114   | 0.700091505 |
| Usp42         | 5.9175   | 8.453    | 0.70004732  |
| Itfg2         | 11.9175  | 17.0255  | 0.699979443 |
| Xkrx          | 1.3455   | 1.923    | 0.699687988 |
| Fam86         | 2.3225   | 3.321    | 0.699337549 |
| Ndrp4         | 437.036  | 624.939  | 0.699325854 |
| Anub1         | 1.146    | 1.639    | 0.699206833 |
| Med6          | 8.754    | 12.52    | 0.699201278 |
| Ppp1r13b      | 15.1665  | 21.6915  | 0.699190927 |
| Msi1          | 7.7415   | 11.074   | 0.699069893 |
| Sdccag3       | 10.0755  | 14.4215  | 0.698644385 |
| Ercc4         | 3.5845   | 5.1325   | 0.698392596 |
| Naa15         | 9.743    | 13.954   | 0.698222732 |
| G6pdx         | 25.4055  | 36.388   | 0.698183467 |
| Gnptab        | 16.4185  | 23.5165  | 0.69816937  |
| Gcc1          | 5.469    | 7.8355   | 0.697977155 |
| A130022J15Rik | 7.7495   | 11.1035  | 0.697933084 |
| Camsap1l1     | 34.477   | 49.399   | 0.697929108 |
| Arhgap1       | 28.9825  | 41.5325  | 0.697827003 |
| Josd1         | 10.702   | 15.3365  | 0.697812408 |
| Tspan5        | 18.9495  | 27.159   | 0.697724511 |
| Ptpn3         | 1.545    | 2.2145   | 0.697674419 |
| Xrcc3         | 28.1845  | 40.403   | 0.697584338 |
| Fam164a       | 14.874   | 21.3235  | 0.697540272 |
| Tex2          | 28.226   | 40.473   | 0.697403207 |
| 6330407J23Rik | 35.329   | 50.6625  | 0.697340242 |
| Pip5k1a       | 6.7085   | 9.628    | 0.696769838 |
| Rgag4         | 11.997   | 17.223   | 0.696568542 |
| Elovl6        | 18.509   | 26.5735  | 0.69652097  |
| Jmjd4         | 3.5285   | 5.066    | 0.696506119 |
| Nop56         | 115.0965 | 165.2525 | 0.696488707 |

|               |         |          |             |
|---------------|---------|----------|-------------|
| Fnbp11        | 19.6425 | 28.2135  | 0.696209262 |
| Aff4          | 42.786  | 61.458   | 0.696182759 |
| Glud1         | 94.607  | 135.8995 | 0.696154143 |
| Foxk2         | 14.605  | 20.984   | 0.696006481 |
| Rapgef6       | 10.1605 | 14.5985  | 0.695996164 |
| Slc35f1       | 15.21   | 21.858   | 0.695855065 |
| Sorbs1        | 19.805  | 28.4645  | 0.695778953 |
| Qars          | 4.9505  | 7.1155   | 0.695734664 |
| Cndp2         | 5.638   | 8.107    | 0.695448378 |
| Kifc2         | 26.477  | 38.0765  | 0.695363282 |
| Fam57b        | 8.0995  | 11.6485  | 0.695325578 |
| Erlec1        | 6.1525  | 8.854    | 0.694883668 |
| Lphn3         | 17.371  | 25.003   | 0.694756629 |
| Apc           | 22.212  | 31.9735  | 0.694700299 |
| St8sia1       | 9.1755  | 13.209   | 0.694640018 |
| Lrrc16b       | 3.7145  | 5.348    | 0.694558714 |
| 1600012F09Rik | 8.956   | 12.8955  | 0.694505835 |
| Lipt2         | 2.1195  | 3.052    | 0.694462647 |
| Epha7         | 2.438   | 3.511    | 0.694389063 |
| Sergef        | 3.936   | 5.6685   | 0.694363588 |
| Fbxw8         | 3.4595  | 4.986    | 0.69384276  |
| Spon1         | 8.5495  | 12.323   | 0.693783981 |
| Tufm          | 10.3125 | 14.8665  | 0.693673696 |
| AI597468      | 14.9215 | 21.513   | 0.693603867 |
| Slc17a5       | 4.2995  | 6.199    | 0.69357961  |
| Hmg111        | 2.149   | 3.0985   | 0.693561401 |
| Lsamp         | 57.299  | 82.6215  | 0.693511979 |
| Krit1         | 4.1235  | 5.947    | 0.693374811 |
| Tmem98        | 5.465   | 7.8855   | 0.693044195 |
| Riok2         | 8.048   | 11.615   | 0.692897116 |
| Tsga14        | 2.1935  | 3.166    | 0.692830069 |
| Anxa6         | 12.5225 | 18.0755  | 0.692788581 |
| Tada1         | 9.425   | 13.6045  | 0.692785475 |
| Gm10726       | 3.7275  | 5.3805   | 0.692779481 |
| 4933411K20Rik | 13.066  | 18.8615  | 0.692733876 |
| Rasgrp1       | 16.791  | 24.241   | 0.692669444 |
| 1300010F03Rik | 4.0485  | 5.845    | 0.692643285 |
| Ptprg         | 7.9975  | 11.5515  | 0.692334329 |
| Slc25a27      | 13.921  | 20.1145  | 0.692087797 |
| Tmem56        | 4.495   | 6.495    | 0.692070824 |
| Kcnf1         | 2.001   | 2.892    | 0.691908714 |
| Bmp2          | 1.5645  | 2.2615   | 0.69179748  |
| Lactb         | 3.117   | 4.506    | 0.691744341 |
| Tbc1d23       | 2.556   | 3.696    | 0.691558442 |
| Dcun1d1       | 11.851  | 17.1385  | 0.691484086 |
| 9430038I01Rik | 2.342   | 3.387    | 0.691467375 |
| Prkcsh        | 9.5195  | 13.769   | 0.691371922 |
| Ostf1         | 4.251   | 6.149    | 0.691331924 |
| Sin3a         | 11.138  | 16.113   | 0.691243096 |
| Snx12         | 85.059  | 123.0585 | 0.69120784  |
| Ptgfrn        | 1.7895  | 2.589    | 0.691193511 |
| Pias4         | 2.9175  | 4.221    | 0.691186923 |
| Reep1         | 33.8785 | 49.023   | 0.691073578 |
| Ash11         | 20.7345 | 30.0115  | 0.690885161 |
| Elavl2        | 37.713  | 54.591   | 0.690828158 |

|               |         |          |             |
|---------------|---------|----------|-------------|
| Pgm211        | 28.5575 | 41.347   | 0.690678888 |
| Armc7         | 2.044   | 2.9595   | 0.690657206 |
| Pctp          | 1.1875  | 1.7195   | 0.690607735 |
| Apbb3         | 4.6585  | 6.746    | 0.690557367 |
| Tpst1         | 7.9125  | 11.46    | 0.690445026 |
| Tnrc6b        | 15.318  | 22.19    | 0.690310951 |
| Fam55c        | 2.4295  | 3.5195   | 0.690296917 |
| Eif4enif1     | 19.058  | 27.609   | 0.690282154 |
| Prpsap1       | 12.516  | 18.1355  | 0.690138127 |
| Gm4332        | 2.461   | 3.566    | 0.690128996 |
| Papolg        | 6.068   | 8.7935   | 0.690055154 |
| Mtap9         | 21.9435 | 31.8045  | 0.689949535 |
| Igsf9b        | 2.7035  | 3.9185   | 0.689932372 |
| Htatip2       | 3.5455  | 5.141    | 0.689651819 |
| Lmbrd2        | 5.164   | 7.4885   | 0.689590706 |
| Rgs16         | 7.866   | 11.407   | 0.689576576 |
| Gm5141        | 1.167   | 1.6925   | 0.689512555 |
| Dhx38         | 5.0455  | 7.318    | 0.689464335 |
| Gck           | 1.81    | 2.6255   | 0.689392497 |
| Vash2         | 2.599   | 3.77     | 0.68938992  |
| Trim33        | 9.37    | 13.594   | 0.68927468  |
| Papola        | 34.915  | 50.668   | 0.689093708 |
| Cacng2        | 35.1325 | 50.987   | 0.689048189 |
| Gm10045       | 2.7065  | 3.9285   | 0.688939799 |
| Zfp239        | 8.8475  | 12.845   | 0.688789412 |
| Mll5          | 40.3975 | 58.663   | 0.68863679  |
| Pigk          | 11.974  | 17.3885  | 0.688616039 |
| LOC100502698  | 10.5715 | 15.353   | 0.688562496 |
| Ap3s2         | 19.19   | 27.8705  | 0.688541648 |
| Otud4         | 3.946   | 5.731    | 0.688536032 |
| Eri2          | 1.712   | 2.487    | 0.688379574 |
| Srr           | 10.9455 | 15.901   | 0.688352934 |
| Nsfl1c        | 88.342  | 128.3445 | 0.688319328 |
| Zrsr2         | 11.937  | 17.3475  | 0.688110679 |
| Gm2423        | 6.847   | 9.9525   | 0.687967847 |
| Pabpc4        | 7.7695  | 11.2955  | 0.68784029  |
| Zfand3        | 13.981  | 20.328   | 0.687770563 |
| Fdft1         | 28.6775 | 41.7025  | 0.687668605 |
| Fbxl18        | 2.7595  | 4.0145   | 0.687383236 |
| Fam190a       | 1.9005  | 2.765    | 0.687341772 |
| 4930539E08Rik | 5.4075  | 7.868    | 0.68727758  |
| Tcof1         | 4.029   | 5.8625   | 0.687249467 |
| Klhl2         | 8.6355  | 12.567   | 0.687156839 |
| Casd1         | 11.634  | 16.9335  | 0.687040482 |
| Lats2         | 2.4375  | 3.5485   | 0.686909962 |
| Efnb1         | 1.097   | 1.5975   | 0.686697966 |
| Apba3         | 1.225   | 1.784    | 0.686659193 |
| Zfp438        | 2.955   | 4.304    | 0.686570632 |
| Reck          | 1.0425  | 1.5185   | 0.686532763 |
| Rad51c        | 1.44    | 2.0975   | 0.686531585 |
| Gm12942       | 1.5135  | 2.205    | 0.686394558 |
| Sema6d        | 20.2895 | 29.5665  | 0.68623273  |
| Gabpb1        | 6.386   | 9.307    | 0.68615021  |
| Nrbp2         | 33.052  | 48.1885  | 0.685889787 |
| Trim9         | 26.3625 | 38.438   | 0.685844737 |

|               |         |         |             |
|---------------|---------|---------|-------------|
| Asap2         | 8.2795  | 12.072  | 0.685843274 |
| Rrm2b         | 8.4895  | 12.3805 | 0.68571544  |
| Ube2v2        | 14.0745 | 20.532  | 0.685490941 |
| Map3k10       | 5.6815  | 8.2885  | 0.685467817 |
| Pla2g4e       | 7.686   | 11.2135 | 0.68542382  |
| Ptpn2         | 2.3105  | 3.371   | 0.685404924 |
| Atf7          | 2.815   | 4.1075  | 0.68533171  |
| Arsb          | 12.235  | 17.8535 | 0.685299801 |
| Ebna1bp2      | 18.396  | 26.849  | 0.685165183 |
| Fign          | 6.372   | 9.3005  | 0.685124456 |
| Wfdc12        | 5.7615  | 8.4105  | 0.685036561 |
| Hectd3        | 9.4065  | 13.732  | 0.685005826 |
| Me1           | 12.3815 | 18.077  | 0.684931128 |
| Ngb           | 17.437  | 25.4675 | 0.684676549 |
| Abcd4         | 2.2625  | 3.305   | 0.684568835 |
| Bmpr1b        | 1.0095  | 1.475   | 0.68440678  |
| Lysmd1        | 5.328   | 7.7865  | 0.684261221 |
| C78339        | 1.442   | 2.1075  | 0.684223013 |
| Pgam5         | 13.3045 | 19.4485 | 0.684088747 |
| Mterfd3       | 2.7525  | 4.024   | 0.684020875 |
| Grm4          | 1.031   | 1.5075  | 0.683913765 |
| Mapk9         | 65.7735 | 96.1765 | 0.683883277 |
| Ralgds        | 15.98   | 23.3675 | 0.683855783 |
| Sestd1        | 3.989   | 5.8335  | 0.683809034 |
| Ammecr11      | 4.0805  | 5.968   | 0.683729893 |
| Slc44a5       | 1.768   | 2.586   | 0.683681361 |
| Dusp23        | 1.288   | 1.884   | 0.683651805 |
| Eif1a         | 25.9975 | 38.028  | 0.683641001 |
| Hnrnpul1      | 56.7255 | 82.976  | 0.683637437 |
| Zfr           | 62.0335 | 90.7415 | 0.68362877  |
| Fkbp15        | 5.821   | 8.5165  | 0.683496742 |
| Zfp37         | 17.763  | 25.99   | 0.683455175 |
| Taf4a         | 4.8955  | 7.163   | 0.683442692 |
| Cdadcl        | 23.403  | 34.245  | 0.683399036 |
| Sema4f        | 9.4865  | 13.885  | 0.683219301 |
| Ppm1a         | 37.497  | 54.8845 | 0.683198353 |
| Grial         | 30.4215 | 44.537  | 0.683061275 |
| Sema3c        | 2.1465  | 3.1425  | 0.683054893 |
| Snrnp70       | 45.6845 | 66.8995 | 0.682882533 |
| Hnrpll        | 11.2295 | 16.4445 | 0.682872693 |
| Rasip1        | 1.8065  | 2.6465  | 0.68259966  |
| Ubr2          | 9.4055  | 13.7855 | 0.682274854 |
| Efr3b         | 20.935  | 30.694  | 0.682055125 |
| Nup43         | 5.652   | 8.287   | 0.682032098 |
| Ust           | 1.5725  | 2.306   | 0.681916739 |
| 5730601F06Rik | 7.8505  | 11.5125 | 0.681910966 |
| Dnajb4        | 30.793  | 45.161  | 0.681849383 |
| Ccdc111       | 1.9565  | 2.8695  | 0.681826102 |
| Hnrnpa2b1     | 52.607  | 77.1605 | 0.681786665 |
| Mtus1         | 10.6815 | 15.667  | 0.681783366 |
| Ksr2          | 36.6305 | 53.737  | 0.681662542 |
| Mgat2         | 1.3775  | 2.0215  | 0.681424685 |
| Gm9781        | 7.307   | 10.7255 | 0.6812736   |
| Urb2          | 3.628   | 5.326   | 0.681186632 |
| Mtdh          | 7.461   | 10.953  | 0.681183237 |



|               |         |         |             |
|---------------|---------|---------|-------------|
| Rtp3          | 1.662   | 2.44    | 0.681147541 |
| Prpf38b       | 17.26   | 25.349  | 0.68089471  |
| Tpbg          | 2.014   | 2.958   | 0.68086545  |
| Sap130        | 39.426  | 57.91   | 0.680815058 |
| Bri3bp        | 12.344  | 18.1315 | 0.680804125 |
| Cwf1911       | 3.7215  | 5.4685  | 0.680533967 |
| Ssbp3         | 35.346  | 51.969  | 0.680136235 |
| Stac2         | 11.8505 | 17.425  | 0.680086083 |
| Fbxo27        | 4.4155  | 6.493   | 0.680040043 |
| Dhx33         | 2.326   | 3.4205  | 0.680017541 |
| Pcdh7         | 19.414  | 28.55   | 0.68        |
| Gabrb1        | 18.82   | 27.6765 | 0.679999277 |
| Abcg2         | 1.0365  | 1.5245  | 0.679895048 |
| Susd4         | 20.855  | 30.674  | 0.679891765 |
| Dusp22        | 12.8805 | 18.949  | 0.679745633 |
| Ncoa1         | 22.0955 | 32.516  | 0.679527002 |
| Osbp15        | 1.9465  | 2.865   | 0.679406632 |
| Syt16         | 8.95    | 13.1735 | 0.679394238 |
| Rap2a         | 55.399  | 81.542  | 0.679392215 |
| 4632411B12Rik | 14.629  | 21.5335 | 0.679360067 |
| Rufy2         | 4.254   | 6.263   | 0.679227207 |
| Pgpep1        | 4.059   | 5.976   | 0.679216867 |
| Amot          | 1.2065  | 1.7765  | 0.679144385 |
| Ss18          | 3.352   | 4.936   | 0.679092382 |
| Man1c1        | 7.1935  | 10.5935 | 0.679048473 |
| Mut           | 5.547   | 8.1695  | 0.678988922 |
| Mecr          | 1.919   | 2.8265  | 0.678931541 |
| Calcr         | 7.583   | 11.17   | 0.678871979 |
| Giyd2         | 8.025   | 11.8225 | 0.678790442 |
| Necab1        | 9.6025  | 14.1475 | 0.678741827 |
| Celf1         | 20.301  | 29.911  | 0.678713517 |
| Csgalnact1    | 1.5755  | 2.3215  | 0.678656041 |
| Rpa2          | 3.535   | 5.209   | 0.678633135 |
| Zcchc8        | 2.946   | 4.3415  | 0.678567315 |
| Inpp4b        | 2.5275  | 3.725   | 0.67852349  |
| Pak3          | 37.708  | 55.58   | 0.678445484 |
| Sys1          | 4.2815  | 6.3115  | 0.678364889 |
| Thop1         | 4.1745  | 6.154   | 0.678339292 |
| Pabpc1        | 62.311  | 91.8615 | 0.678314637 |
| Hint3         | 12.6705 | 18.6825 | 0.678201525 |
| Trappc5       | 13.141  | 19.3765 | 0.678192656 |
| Sycp3         | 1.7965  | 2.649   | 0.678180445 |
| Net1          | 2.262   | 3.3355  | 0.678159197 |
| LOC100503228  | 1.6585  | 2.446   | 0.678045789 |
| Gtf2e2        | 7.016   | 10.3475 | 0.678038173 |
| Vapb          | 18.037  | 26.607  | 0.677904311 |
| Nrip2         | 18.4635 | 27.2365 | 0.677895471 |
| Bahcc1        | 2.4885  | 3.671   | 0.677880686 |
| Zfp810        | 2.407   | 3.551   | 0.677837229 |
| Zfp287        | 4.459   | 6.5785  | 0.677814091 |
| Rala          | 16.1615 | 23.8465 | 0.677730485 |
| Fam53c        | 16.7125 | 24.664  | 0.677607039 |
| 181003007Rik  | 19.549  | 28.8515 | 0.67757309  |
| Asxl3         | 2.0205  | 2.982   | 0.677565392 |
| Zkscan2       | 4.2735  | 6.3105  | 0.677204659 |

|               |          |          |             |
|---------------|----------|----------|-------------|
| Epc2          | 10.861   | 16.039   | 0.677161918 |
| Cpt2          | 2.2685   | 3.351    | 0.676962101 |
| Lrch2         | 3.513    | 5.1895   | 0.676943829 |
| BC031353      | 5.048    | 7.458    | 0.676857066 |
| AU022252      | 2.817    | 4.162    | 0.676838059 |
| Xrn2          | 8.886    | 13.132   | 0.676667682 |
| Camk2n1       | 136.034  | 201.0665 | 0.676562232 |
| BC024978      | 8.377    | 12.383   | 0.676491965 |
| Tmem181a      | 7.4635   | 11.0345  | 0.676378631 |
| D3Ert254e     | 7.557    | 11.175   | 0.676241611 |
| Xab2          | 6.8715   | 10.163   | 0.676129096 |
| Peli1         | 12.119   | 17.9245  | 0.676113699 |
| Mbd1          | 4.925    | 7.286    | 0.675953884 |
| BC016423      | 3.396    | 5.0245   | 0.675888148 |
| Zfp646        | 1.429    | 2.1155   | 0.675490428 |
| Pcm1          | 13.839   | 20.4905  | 0.675386155 |
| Lin52         | 5.635    | 8.3445   | 0.675295105 |
| Usp25         | 6.3815   | 9.451    | 0.675219553 |
| Soat1         | 3.0765   | 4.558    | 0.674967091 |
| Pdcl3         | 10.4215  | 15.441   | 0.674923904 |
| Dcp1b         | 3.797    | 5.626    | 0.67490224  |
| Cln3          | 19.17    | 28.4145  | 0.674655546 |
| Rbm2          | 7.064    | 10.4795  | 0.674077962 |
| Map2k5        | 4.012    | 5.952    | 0.67405914  |
| Ccdc84        | 1.2045   | 1.787    | 0.674034695 |
| Kif26b        | 1.205    | 1.788    | 0.67393736  |
| Zfp365        | 35.8515  | 53.204   | 0.673849711 |
| Gnl3l         | 98.7965  | 146.6235 | 0.673810815 |
| Chek2         | 1.769    | 2.6255   | 0.673776424 |
| Cdh10         | 4.688    | 6.958    | 0.673756827 |
| Fndc3a        | 18.27    | 27.117   | 0.673747096 |
| Rnf180        | 3.784    | 5.6165   | 0.673729191 |
| Tapt1         | 7.0435   | 10.456   | 0.673632364 |
| Grin2a        | 3.8855   | 5.768    | 0.673630374 |
| Apaf1         | 1.2125   | 1.8005   | 0.673424049 |
| Rnf213        | 1.7345   | 2.576    | 0.673330745 |
| Efna2         | 1.086    | 1.613    | 0.673279603 |
| Slc13a5       | 1.0715   | 1.5915   | 0.673264216 |
| Suv39h1       | 5.6615   | 8.4095   | 0.673226708 |
| Plekhb2       | 62.2325  | 92.4485  | 0.673158569 |
| Psmg3         | 4.1965   | 6.235    | 0.673055333 |
| Rpl3          | 317.1585 | 471.2235 | 0.673053233 |
| Rg9mtd3       | 10.0425  | 14.9235  | 0.672931953 |
| Ccdc6         | 19.816   | 29.4485  | 0.672903543 |
| Tubb6         | 3.6935   | 5.491    | 0.672646148 |
| Edil3         | 12.382   | 18.41    | 0.672569256 |
| Tiam1         | 7.567    | 11.2535  | 0.672413027 |
| 2610008E11Rik | 2.47     | 3.6735   | 0.672383286 |
| Sike1         | 10.585   | 15.7435  | 0.672340966 |
| Srpk2         | 20.8675  | 31.042   | 0.672234392 |
| Agl           | 3.9825   | 5.925    | 0.672151899 |
| Ippk          | 4.293    | 6.387    | 0.672146548 |
| 3110052M02Rik | 3.5805   | 5.327    | 0.672141919 |
| 2210009G21Rik | 2.3405   | 3.483    | 0.67197818  |
| 1810026J23Rik | 15.8365  | 23.567   | 0.671977766 |

|               |          |         |             |
|---------------|----------|---------|-------------|
| Slc25a12      | 121.9535 | 181.512 | 0.671875689 |
| Cap1          | 42.2505  | 62.899  | 0.671719741 |
| Acvr2a        | 4.2315   | 6.301   | 0.67156007  |
| Fntb          | 9.277    | 13.8185 | 0.671346383 |
| Abi1          | 21.4545  | 31.9625 | 0.671239734 |
| Nudt4         | 17.2235  | 25.66   | 0.671219797 |
| Frmd8         | 3.447    | 5.138   | 0.670883612 |
| Vwa5a         | 2.3125   | 3.447   | 0.670873223 |
| Cercam        | 3.233    | 4.8195  | 0.670816475 |
| Supt5h        | 23.457   | 34.9715 | 0.670746179 |
| St6galnac5    | 9.688    | 14.4525 | 0.670333852 |
| Zfp811        | 4.3655   | 6.513   | 0.670274835 |
| Ctps2         | 13.6725  | 20.4    | 0.670220588 |
| Gapvd1        | 12.4655  | 18.6015 | 0.670134129 |
| Zfp410        | 4.1595   | 6.208   | 0.670022552 |
| Ddx52         | 4.8965   | 7.3085  | 0.669973319 |
| Fam33a        | 2.8035   | 4.185   | 0.669892473 |
| Ncoa7         | 9.731    | 14.53   | 0.669717825 |
| Gm10002       | 1.402    | 2.0935  | 0.669691904 |
| Dlc1          | 10.4765  | 15.6455 | 0.669617462 |
| Kcnc2         | 8.8085   | 13.1565 | 0.669516969 |
| Sema5a        | 6.902    | 10.309  | 0.669512077 |
| Eif2s1        | 8.929    | 13.34   | 0.66934033  |
| Mast4         | 13.0875  | 19.5535 | 0.669317513 |
| Bat3          | 32.7015  | 48.8615 | 0.669269261 |
| Osgep         | 4.7265   | 7.0625  | 0.669238938 |
| Frmd3         | 3.7405   | 5.5915  | 0.668961817 |
| Gjd2          | 1.87     | 2.7955  | 0.668932212 |
| Mlh3          | 10.0545  | 15.032  | 0.668873071 |
| Slc20a1       | 10.373   | 15.516  | 0.668535705 |
| Lig3          | 2.6145   | 3.913   | 0.668157424 |
| LOC100504120  | 6.9795   | 10.447  | 0.668086532 |
| Ccdc17        | 1.6765   | 2.51    | 0.667928287 |
| Zfp804b       | 2.2405   | 3.3545  | 0.667908779 |
| Glod4         | 23.7435  | 35.557  | 0.66775881  |
| Gm5165        | 2.7325   | 4.093   | 0.667603225 |
| Dtymk         | 16.721   | 25.0475 | 0.667571614 |
| Ccdc34        | 7.668    | 11.4875 | 0.667508161 |
| Zfp28         | 2.1575   | 3.233   | 0.667336839 |
| Mga           | 5.127    | 7.6835  | 0.667274029 |
| Pdxdc1        | 17.5525  | 26.3055 | 0.667255897 |
| Utp23         | 6.8      | 10.194  | 0.667059054 |
| Elfn1         | 24.489   | 36.7245 | 0.666830045 |
| Nosip         | 8.2335   | 12.3495 | 0.666707154 |
| Zfp87         | 6.07     | 9.106   | 0.666593455 |
| Unkl          | 10.482   | 15.725  | 0.666581876 |
| Slc25a1       | 21.635   | 32.462  | 0.666471567 |
| St6galnac4    | 1.3175   | 1.977   | 0.666413758 |
| Orc3l         | 11.143   | 16.721  | 0.666407512 |
| Gm8618        | 6.745    | 10.1215 | 0.666403201 |
| Tmem106b      | 14.6435  | 21.974  | 0.666401201 |
| Zmym5         | 7.425    | 11.1455 | 0.666188148 |
| Pnpla2        | 8.274    | 12.421  | 0.666129941 |
| Gabrg1        | 6.861    | 10.3025 | 0.665954865 |
| 1110031102Rik | 2.089    | 3.137   | 0.665922856 |

|               |          |          |             |
|---------------|----------|----------|-------------|
| Rb1cc1        | 10.7195  | 16.099   | 0.66584881  |
| 9030624J02Rik | 15.298   | 22.9845  | 0.665578977 |
| Bcl9l         | 10.0015  | 15.029   | 0.665480072 |
| Dfna5         | 7.895    | 11.8645  | 0.665430486 |
| Nt5m          | 23.7395  | 35.6795  | 0.665354055 |
| Dync1i2       | 39.971   | 60.0885  | 0.66520216  |
| Cul4a         | 20.089   | 30.2015  | 0.665165637 |
| Rpusd2        | 2.3115   | 3.4755   | 0.665084161 |
| Trim37        | 33.738   | 50.736   | 0.664971618 |
| Kbtbd7        | 5.5015   | 8.2755   | 0.664793668 |
| Npbwr1        | 2.9855   | 4.4915   | 0.664699989 |
| Cwf19l2       | 3.6425   | 5.48     | 0.664689781 |
| Suv420h1      | 8.822    | 13.2745  | 0.66458247  |
| Srsf10        | 25.364   | 38.166   | 0.66457056  |
| 9830001H06Rik | 11.07    | 16.663   | 0.664346156 |
| Ints4         | 9.6645   | 14.5475  | 0.664340952 |
| Cnot10        | 6.9285   | 10.4295  | 0.664317561 |
| Cbr3          | 1.209    | 1.82     | 0.664285714 |
| Lztf1l        | 9.6285   | 14.4965  | 0.664194806 |
| Tm9sf3        | 9.082    | 13.674   | 0.664180196 |
| Dhx30         | 9.4185   | 14.1815  | 0.664139901 |
| Gm10786       | 5.2895   | 7.965    | 0.664092906 |
| Sidt1         | 4.0945   | 6.166    | 0.664044762 |
| Zfp647        | 1.5415   | 2.3215   | 0.664010338 |
| Rufy3         | 103.7635 | 156.2895 | 0.663918561 |
| 2400003C14Rik | 13.546   | 20.4045  | 0.663873165 |
| AI597479      | 12.766   | 19.2305  | 0.663841294 |
| Ablim1        | 8.584    | 12.932   | 0.663779771 |
| Asap1         | 19.291   | 29.0635  | 0.663753505 |
| Rbbp6         | 35.5255  | 53.532   | 0.663631099 |
| Coro2b        | 29.5835  | 44.5805  | 0.663597313 |
| Bcl10         | 6.828    | 10.2895  | 0.663589096 |
| LOC100504277  | 9.876    | 14.8925  | 0.663152594 |
| Fam189b       | 2.9015   | 4.3755   | 0.663124214 |
| As3mt         | 9.648    | 14.5495  | 0.663115571 |
| Zic4          | 4.111    | 6.2015   | 0.662904136 |
| Adarb1        | 21.4995  | 32.4325  | 0.662899869 |
| Dclk1         | 73.6755  | 111.147  | 0.662865394 |
| Hnrnpf        | 23.755   | 35.8445  | 0.662723709 |
| Brpf3         | 5.531    | 8.3475   | 0.662593591 |
| Gsk3b         | 118.6135 | 179.022  | 0.662563819 |
| Slc18a2       | 1.8555   | 2.8005   | 0.662560257 |
| Mtcp1         | 4.551    | 6.8695   | 0.662493631 |
| Mapk10        | 86.6125  | 130.743  | 0.662463765 |
| Flot1         | 30.7535  | 46.4235  | 0.662455437 |
| D14Abbl1e     | 5.206    | 7.8595   | 0.662383103 |
| Eif2ak3       | 1.388    | 2.0955   | 0.662371749 |
| Dnm1l         | 51.958   | 78.4515  | 0.662294539 |
| Spns2         | 9.191    | 13.886   | 0.661889673 |
| Gm6570        | 1.1285   | 1.705    | 0.661876833 |
| Dusp12        | 4.3405   | 6.558    | 0.661863373 |
| Sgms2         | 1.7455   | 2.6375   | 0.661800948 |
| Sf3a1         | 12.4375  | 18.7955  | 0.661727541 |
| Usp27x        | 12.625   | 19.08    | 0.661687631 |
| Dars2         | 2.3735   | 3.588    | 0.661510591 |

|               |         |         |             |
|---------------|---------|---------|-------------|
| Dact1         | 2.5045  | 3.7865  | 0.66142876  |
| Oma1          | 4.0565  | 6.134   | 0.661313988 |
| Cyth3         | 5.1975  | 7.861   | 0.661175423 |
| Luc7l3        | 46.4945 | 70.3515 | 0.660888538 |
| Zfp418        | 2.995   | 4.532   | 0.660856134 |
| Htr2a         | 2.7605  | 4.1805  | 0.660327712 |
| Apool         | 1.4225  | 2.1545  | 0.660245997 |
| Mical2        | 10.0665 | 15.247  | 0.660228242 |
| Rnaseh1       | 3.0815  | 4.6675  | 0.660203535 |
| Vat1l         | 77.743  | 117.778 | 0.66008083  |
| Ext1          | 6.8845  | 10.4305 | 0.660035473 |
| Otud5         | 14.8165 | 22.456  | 0.659801389 |
| Slc25a36      | 6.7105  | 10.1725 | 0.659670681 |
| Wfs1          | 15.1025 | 22.8975 | 0.659569822 |
| Stk32b        | 7.925   | 12.0165 | 0.659509841 |
| Aftph         | 19.9925 | 30.321  | 0.659361499 |
| Fez2          | 13.4275 | 20.3645 | 0.659358197 |
| Tspyl4        | 134.384 | 203.856 | 0.659210423 |
| Ctdspl2       | 5.554   | 8.4255  | 0.659189366 |
| Pias1         | 28.829  | 43.7375 | 0.659136896 |
| Zbed3         | 7.07    | 10.7315 | 0.658808182 |
| Secisbp21     | 16.9295 | 25.703  | 0.658658522 |
| Pid1          | 9.4595  | 14.362  | 0.658647821 |
| Zmat3         | 63.1955 | 95.949  | 0.658636359 |
| Hdlbp         | 36.075  | 54.7905 | 0.658417061 |
| Pat1          | 11.0665 | 16.8085 | 0.658387126 |
| Rabgap1       | 24.5375 | 37.27   | 0.658371344 |
| Gm12966       | 1.534   | 2.331   | 0.658086658 |
| Rpgr          | 3.582   | 5.4435  | 0.658032516 |
| Cggbp1        | 9.8275  | 14.936  | 0.657974022 |
| Col4a3bp      | 12.3145 | 18.7215 | 0.657773149 |
| Ino80c        | 9.9075  | 15.063  | 0.657737502 |
| Sirt3         | 14.229  | 21.6345 | 0.657699508 |
| B630005N14Rik | 10.07   | 15.3125 | 0.657632653 |
| Ttc9          | 8.1885  | 12.4515 | 0.657631611 |
| Gpr137c       | 7.404   | 11.2595 | 0.657578045 |
| Nup153        | 5.3835  | 8.188   | 0.657486566 |
| Stam2         | 5.7505  | 8.7465  | 0.657462985 |
| Gsg1l         | 5.0005  | 7.6065  | 0.657398278 |
| 9130404D08Rik | 5.8915  | 8.962   | 0.657386744 |
| Smarca1       | 7.713   | 11.7355 | 0.65723659  |
| Zfp748        | 2.0935  | 3.186   | 0.657093534 |
| Zfp788        | 9.9335  | 15.118  | 0.657064427 |
| Nelf          | 15.7845 | 24.025  | 0.657003122 |
| Glmn          | 2.4125  | 3.672   | 0.656998911 |
| H2-gs10       | 6.5875  | 10.028  | 0.65691065  |
| St3gal1       | 4.7355  | 7.2115  | 0.656659502 |
| Bub3          | 54.825  | 83.5205 | 0.656425668 |
| 4921513I03Rik | 1.6845  | 2.5665  | 0.656341321 |
| Gm14391       | 15.4625 | 23.5605 | 0.656289128 |
| Gm263         | 1.7795  | 2.7115  | 0.656278812 |
| Bat5          | 7.679   | 11.7035 | 0.656128509 |
| Lrrtm2        | 15.278  | 23.2865 | 0.656088291 |
| Mtmr3         | 7.4475  | 11.353  | 0.65599401  |
| Senp5         | 7.6775  | 11.706  | 0.655860243 |

|               |         |          |             |
|---------------|---------|----------|-------------|
| Cisd2         | 15.1825 | 23.155   | 0.655689916 |
| Calu          | 5.0335  | 7.6775   | 0.655617063 |
| Cpeb1         | 12.77   | 19.4785  | 0.65559463  |
| Tdp1          | 2.4975  | 3.8105   | 0.655425797 |
| Nrd1          | 24.1335 | 36.824   | 0.655374212 |
| Shc1          | 1.3635  | 2.0805   | 0.655371305 |
| Dtx2          | 1.6295  | 2.4865   | 0.65533883  |
| 4930471M23Rik | 1.4805  | 2.2595   | 0.655233459 |
| Sec61a2       | 8.758   | 13.3665  | 0.65522014  |
| Pnp           | 4.1725  | 6.3705   | 0.654972137 |
| Spen          | 10.1015 | 15.426   | 0.654835991 |
| Xpot          | 13.765  | 21.0265  | 0.654650084 |
| Dip2a         | 7.5525  | 11.539   | 0.654519456 |
| Ppwd1         | 1.1915  | 1.8205   | 0.654490525 |
| Ppp2r2c       | 67.8725 | 103.7565 | 0.654151788 |
| Letmd1        | 9.6675  | 14.78    | 0.654093369 |
| Zfp160        | 1.274   | 1.9485   | 0.653836284 |
| Zfp758        | 3.066   | 4.691    | 0.653591985 |
| Mpp2          | 30.7485 | 47.048   | 0.653555943 |
| Rbm45         | 5.0975  | 7.8005   | 0.653483751 |
| Pld5          | 6.7525  | 10.336   | 0.653299149 |
| Best1         | 1.692   | 2.59     | 0.653281853 |
| Naa50         | 13.8245 | 21.163   | 0.653239144 |
| Enah          | 37.9575 | 58.107   | 0.65323455  |
| Ewsr1         | 37.9485 | 58.103   | 0.653124624 |
| 2610301B20Rik | 10.547  | 16.1525  | 0.652963937 |
| Dgat2         | 6.3     | 9.6485   | 0.652951236 |
| Gtpbp8        | 6.0625  | 9.286    | 0.652864527 |
| Depdc5        | 5.286   | 8.0975   | 0.652794072 |
| Osbpl8        | 9.4895  | 14.539   | 0.652692757 |
| Kctd18        | 7.002   | 10.7285  | 0.652654146 |
| Fah           | 3.648   | 5.5895   | 0.652652294 |
| Fibp          | 36.159  | 55.4385  | 0.652236262 |
| Foxk1         | 10.1535 | 15.571   | 0.65207758  |
| Rab22a        | 17.9655 | 27.5535  | 0.652022429 |
| Rsb1l1        | 4.438   | 6.8075   | 0.651928021 |
| Wibg          | 4.644   | 7.127    | 0.651606567 |
| Zfp207        | 56.5565 | 86.801   | 0.651565074 |
| Dstyk         | 6.7985  | 10.4365  | 0.651415704 |
| Acs1l         | 13.2535 | 20.3475  | 0.651357661 |
| Crkl          | 15.6565 | 24.0375  | 0.651336453 |
| Pcmt1         | 7.4895  | 11.5     | 0.65126087  |
| Zc3h14        | 9.866   | 15.15    | 0.651221122 |
| Ndst4         | 8.196   | 12.586   | 0.651199746 |
| Rilpl1        | 8.4745  | 13.0155  | 0.651108294 |
| Armc2         | 1.3315  | 2.0455   | 0.65094109  |
| 1810055G02Rik | 7.959   | 12.2275  | 0.650909834 |
| Wdr8          | 3.2335  | 4.968    | 0.650865539 |
| Fgd4          | 3.2655  | 5.0175   | 0.650822123 |
| Ambra1        | 10.777  | 16.5605  | 0.650765375 |
| St6gal2       | 2.1075  | 3.239    | 0.650663785 |
| Snx32         | 22.381  | 34.4045  | 0.650525367 |
| Nr4a2         | 6.0315  | 9.2725   | 0.650471825 |
| Psmc3         | 26.507  | 40.7535  | 0.650422663 |
| Add1          | 43.598  | 67.0515  | 0.650216625 |

|               |         |         |             |
|---------------|---------|---------|-------------|
| Zbtb40        | 1.0335  | 1.5895  | 0.650204467 |
| Hnrnp         | 27.662  | 42.5525 | 0.650067564 |
| Trmt2b        | 5.323   | 8.1885  | 0.650058008 |
| Slc4a7        | 1.0305  | 1.5855  | 0.649952696 |
| Btrc          | 18.634  | 28.67   | 0.649947681 |
| Zscan12       | 3.842   | 5.9115  | 0.649919648 |
| Bsn           | 10.6115 | 16.334  | 0.649657157 |
| Mapk4         | 7.912   | 12.181  | 0.649536163 |
| 9430016H08Rik | 5.993   | 9.227   | 0.649506882 |
| Pde4b         | 53.855  | 82.926  | 0.649434436 |
| Cpd           | 3.0935  | 4.7635  | 0.649417445 |
| Scarb1        | 2.2115  | 3.4055  | 0.649390692 |
| St7l          | 3.59    | 5.5285  | 0.649362395 |
| Dullard       | 18.9755 | 29.2225 | 0.649345539 |
| Cbr4          | 7.8895  | 12.151  | 0.649288124 |
| B4galt2       | 7.591   | 11.6915 | 0.649275114 |
| 2010300C02Rik | 3.003   | 4.6255  | 0.649227111 |
| Atad3a        | 4.4105  | 6.7935  | 0.649223522 |
| Rbm10         | 9.1825  | 14.151  | 0.648894071 |
| Timm44        | 8.2825  | 12.766  | 0.648793671 |
| 2410131K14Rik | 2.4245  | 3.737   | 0.648782446 |
| Grn           | 7.232   | 11.1495 | 0.648638952 |
| Kpna4         | 16.971  | 26.166  | 0.648589773 |
| Wdr20a        | 4.241   | 6.5395  | 0.648520529 |
| Neto2         | 6.832   | 10.5355 | 0.648474206 |
| Armex3        | 10.711  | 16.5185 | 0.648424494 |
| Mknk1         | 3.116   | 4.8065  | 0.648288776 |
| Ank           | 18.0565 | 27.8565 | 0.64819701  |
| Ccl9          | 1.11    | 1.7125  | 0.648175182 |
| Rnf32         | 1.9805  | 3.057   | 0.647857377 |
| Cdyl2         | 1.6735  | 2.5835  | 0.64776466  |
| Trip4         | 5.181   | 8.0005  | 0.647584526 |
| Fip111        | 26.288  | 40.603  | 0.647439844 |
| Gm5921        | 1.0265  | 1.5855  | 0.647429833 |
| Fam160b1      | 4.0375  | 6.237   | 0.647346481 |
| Med12l        | 6.1345  | 9.4765  | 0.647338152 |
| Ogfod2        | 5.179   | 8.0005  | 0.647334542 |
| Trim35        | 25.2965 | 39.078  | 0.647333538 |
| Akt2          | 6.3085  | 9.746   | 0.647291196 |
| Lhfpl4        | 41.061  | 63.439  | 0.647251691 |
| 4930402E16Rik | 3.3565  | 5.186   | 0.647223293 |
| Cadm3         | 53.5945 | 82.8295 | 0.64704604  |
| Srd5a1        | 2.5815  | 3.9905  | 0.646911415 |
| BC002230      | 1.043   | 1.6125  | 0.646821705 |
| Ibtk          | 2.9025  | 4.489   | 0.64658053  |
| Extl3         | 12.2335 | 18.927  | 0.646351773 |
| Adck2         | 1.6975  | 2.6265  | 0.646297354 |
| Atp2b3        | 28.9765 | 44.8455 | 0.646140638 |
| Nfrkb         | 3.562   | 5.513   | 0.646109196 |
| Camsap1       | 17.357  | 26.8755 | 0.645829845 |
| Prickle2      | 10.8355 | 16.778  | 0.645815949 |
| Mpv17l        | 9.8015  | 15.1785 | 0.645748921 |
| 3632451O06Rik | 2.17    | 3.3605  | 0.645737241 |
| Zmat1         | 6.0305  | 9.339   | 0.645732948 |
| Dgkz          | 5.897   | 9.1345  | 0.64557447  |

|               |           |          |             |
|---------------|-----------|----------|-------------|
| Stradb        | 9.687     | 15.007   | 0.645498767 |
| Ece1          | 16.891    | 26.172   | 0.64538438  |
| Acadl         | 5.6375    | 8.737    | 0.645244363 |
| Fam3a         | 2.948     | 4.569    | 0.645217772 |
| Lrrfip1       | 10.8685   | 16.8465  | 0.645148844 |
| Ppil2         | 14.0765   | 21.82    | 0.645119157 |
| Dok6          | 2.1695    | 3.363    | 0.645108534 |
| Ggnbp2        | 24.741    | 38.3555  | 0.645044387 |
| Usp1          | 1.786     | 2.769    | 0.644998194 |
| Nucb1         | 9.613     | 14.9055  | 0.644929724 |
| Eif2s3x       | 42.8235   | 66.407   | 0.644864246 |
| 1300018J18Rik | 1.517     | 2.3525   | 0.644845909 |
| Elavl3        | 66.2705   | 102.791  | 0.644711113 |
| Zfp275        | 10.3245   | 16.0165  | 0.644616489 |
| Ifngr1        | 1.7725    | 2.75     | 0.644545455 |
| Magi2         | 19.061    | 29.5765  | 0.644464355 |
| 2510002D24Rik | 7.6085    | 11.8065  | 0.644433151 |
| Syt7          | 14.161    | 21.975   | 0.644414107 |
| Psmc3ip       | 3.4145    | 5.299    | 0.644366862 |
| Kdm5a         | 5.2665    | 8.1735   | 0.644338411 |
| Bud13         | 3.628     | 5.631    | 0.644290535 |
| Atg3          | 13.103    | 20.3405  | 0.644182788 |
| Cd3eap        | 6.6505    | 10.324   | 0.644178613 |
| Ubqln4        | 16.521    | 25.6505  | 0.644081012 |
| Six3          | 19.5      | 30.276   | 0.644074514 |
| Rlim          | 18.4185   | 28.61    | 0.643778399 |
| Zfp703        | 4.59      | 7.13     | 0.643758766 |
| P2rx3         | 3.8135    | 5.9245   | 0.643683011 |
| Eme2          | 3.4785    | 5.405    | 0.643570768 |
| 2610002J02Rik | 14.925    | 23.1915  | 0.643554751 |
| Ankle1        | 1.708     | 2.655    | 0.643314501 |
| Plcl1         | 4.8065    | 7.4725   | 0.643225159 |
| Pvr12         | 1.991     | 3.0955   | 0.64319173  |
| Gtf3c2        | 8.2945    | 12.896   | 0.643183933 |
| 4933403O08Rik | 1.161     | 1.8055   | 0.64303517  |
| Pole4         | 3.783     | 5.8835   | 0.642984618 |
| Ap3m2         | 49.4985   | 76.983   | 0.642979619 |
| Prpf40a       | 5.694     | 8.857    | 0.642881337 |
| Npc2          | 6.199     | 9.6445   | 0.642749754 |
| Lin7c         | 21.4065   | 33.306   | 0.642722032 |
| C330006A16Rik | 26.2825   | 40.9215  | 0.64226629  |
| LOC100504537  | 35.948    | 55.9785  | 0.642175121 |
| Ppapdc1b      | 5.404     | 8.419    | 0.641881459 |
| Klf12         | 14.3575   | 22.378   | 0.641589954 |
| Mllt10        | 10.7185   | 16.7125  | 0.641346298 |
| Dhcr7         | 4.9265    | 7.6825   | 0.64126261  |
| Erp29         | 36.7455   | 57.305   | 0.641226769 |
| Lancl3        | 3.502     | 5.4625   | 0.641098398 |
| LOC100504665  | 200.955   | 313.4705 | 0.641065108 |
| Arih1         | 10.756    | 16.7855  | 0.640791159 |
| 1700020O03Rik | 6.2635    | 9.7755   | 0.640734489 |
| Gfra2         | 31.337    | 48.928   | 0.640471714 |
| Fam81a        | 7.335     | 11.4535  | 0.640415593 |
| Rab7          | 1406.1295 | 2195.919 | 0.640337599 |
| Zranb1        | 5.231     | 8.1715   | 0.640151747 |



|               |         |          |             |
|---------------|---------|----------|-------------|
| Kcnc1         | 26.2075 | 40.954   | 0.639925282 |
| Irf1          | 5.231   | 8.176    | 0.639799413 |
| Arhgef18      | 4.553   | 7.1165   | 0.639780791 |
| B3galt5       | 4.195   | 6.5595   | 0.639530452 |
| Nphp1         | 3.806   | 5.9525   | 0.639395212 |
| Npl           | 3.7615  | 5.886    | 0.639058784 |
| Sh3yl1        | 5.4235  | 8.487    | 0.639036173 |
| AW555464      | 41.8295 | 65.4645  | 0.63896463  |
| Fam63a        | 2.439   | 3.818    | 0.638816134 |
| Aatk          | 11.3585 | 17.782   | 0.638763919 |
| Snx11         | 3.073   | 4.8115   | 0.638678167 |
| Tacr3         | 2.111   | 3.3065   | 0.638439437 |
| Steap2        | 2.4735  | 3.875    | 0.638322581 |
| Fam168b       | 46.116  | 72.2495  | 0.638288154 |
| Cdyl          | 1.8705  | 2.9305   | 0.638286982 |
| Zfp317        | 3.0145  | 4.724    | 0.638124471 |
| Gm4889        | 1.7295  | 2.7105   | 0.638074156 |
| Ate1          | 21.2605 | 33.32    | 0.638070228 |
| Cacna1c       | 5.1645  | 8.094    | 0.638065234 |
| Arfgap3       | 3.2805  | 5.1415   | 0.638043373 |
| Cep63         | 6.549   | 10.265   | 0.637993181 |
| Epb4.115      | 1.926   | 3.019    | 0.637959589 |
| Rnf130        | 13.244  | 20.7625  | 0.637880795 |
| Sik3          | 40.574  | 63.6095  | 0.637860697 |
| Pten          | 14.48   | 22.701   | 0.637857363 |
| Lrp1b         | 1.892   | 2.9675   | 0.637573715 |
| Heatr7a       | 5.2245  | 8.197    | 0.63736733  |
| Sco1          | 2.4045  | 3.7735   | 0.637206837 |
| Sumf1         | 6.3575  | 9.978    | 0.637151734 |
| Ell           | 5.266   | 8.266    | 0.637067505 |
| C030046I01Rik | 50.388  | 79.096   | 0.63704865  |
| B020018G12Rik | 3.276   | 5.144    | 0.636858476 |
| Terf2ip       | 27.1225 | 42.6045  | 0.636611156 |
| Tmem132c      | 1.002   | 1.5745   | 0.636392506 |
| Rin2          | 2.87    | 4.5115   | 0.636152056 |
| Stip1         | 88.1825 | 138.6335 | 0.636083631 |
| Fam48a        | 8.933   | 14.045   | 0.636027056 |
| Ctnnbip1      | 9.021   | 14.1835  | 0.636020728 |
| Oxnad1        | 5.8125  | 9.139    | 0.636010504 |
| Ctsa          | 8.311   | 13.069   | 0.635932359 |
| Asph          | 14.4475 | 22.719   | 0.635921475 |
| Cox4nb        | 19.862  | 31.2405  | 0.635777276 |
| Aifm3         | 3.6345  | 5.719    | 0.635513202 |
| Plxna4        | 11.381  | 17.9095  | 0.635472794 |
| Anxa7         | 8.256   | 12.9925  | 0.635443525 |
| Usp13         | 6.0655  | 9.5475   | 0.635297198 |
| Pex19         | 11.1415 | 17.539   | 0.635241462 |
| Scly          | 3.9165  | 6.1655   | 0.635228286 |
| Noc3l         | 3.585   | 5.644    | 0.63518781  |
| Mex3c         | 3.314   | 5.2185   | 0.635048386 |
| Mgat3         | 9.954   | 15.676   | 0.634983414 |
| Fbxw7         | 27.693  | 43.628   | 0.634752911 |
| Rbm9          | 41.8305 | 65.903   | 0.634728313 |
| Nlk           | 45.402  | 71.539   | 0.634646836 |
| Zfp677        | 1.147   | 1.8075   | 0.634578147 |

|               |         |          |             |
|---------------|---------|----------|-------------|
| 1700030K09Rik | 1.842   | 2.903    | 0.634516018 |
| Rgnef         | 2.986   | 4.7065   | 0.63444173  |
| Cnot4         | 21.651  | 34.127   | 0.634424356 |
| Man1a         | 2.1595  | 3.404    | 0.634400705 |
| Fam155a       | 39.8645 | 62.8385  | 0.634396111 |
| Zmym6         | 4.0145  | 6.3285   | 0.634352532 |
| Prrt3         | 2.699   | 4.255    | 0.634312573 |
| Sbno1         | 11.7495 | 18.5285  | 0.634131203 |
| Orai3         | 4.418   | 6.968    | 0.634041332 |
| Glb1          | 4.126   | 6.5095   | 0.633842845 |
| Tmem169       | 1.3795  | 2.1765   | 0.633815759 |
| Map2k7        | 37.9415 | 59.869   | 0.633742003 |
| Aph1b         | 1.297   | 2.047    | 0.633610161 |
| Cabp1         | 4.0995  | 6.4725   | 0.633371958 |
| Runx1t1       | 16.336  | 25.797   | 0.633251929 |
| Lman2         | 10.637  | 16.803   | 0.633041719 |
| Tnik          | 20.8815 | 32.988   | 0.63300291  |
| Nr1d2         | 9.702   | 15.3305  | 0.632856071 |
| Aldh3a2       | 16.38   | 25.8915  | 0.632640056 |
| Abr           | 90.307  | 142.7655 | 0.632554784 |
| Lrrn1         | 14.431  | 22.8195  | 0.63239773  |
| Acaca         | 5.507   | 8.7095   | 0.632298065 |
| Huwe1         | 30.48   | 48.2095  | 0.632240534 |
| Mras          | 25.1785 | 39.831   | 0.632133263 |
| 6430548M08Rik | 27.714  | 43.8425  | 0.632126361 |
| Zfp174        | 1.44    | 2.2785   | 0.631994733 |
| Fbxo22        | 53.198  | 84.177   | 0.631977856 |
| Slc41a3       | 3.0335  | 4.8005   | 0.631913342 |
| Sdk2          | 2.055   | 3.2535   | 0.631627478 |
| Fem1a         | 4.0405  | 6.3985   | 0.631476127 |
| Uevld         | 4.937   | 7.8185   | 0.631451046 |
| Zbtb38        | 19.299  | 30.566   | 0.631387817 |
| Gmfb          | 12.558  | 19.891   | 0.631340807 |
| Aph1c         | 2.0855  | 3.304    | 0.6312046   |
| Fubp3         | 8.417   | 13.336   | 0.63114877  |
| Nsd1          | 17.1325 | 27.152   | 0.630984826 |
| Unc50         | 16.809  | 26.6395  | 0.630980311 |
| Dmd           | 6.7755  | 10.74    | 0.630865922 |
| Ttc17         | 5.7595  | 9.1305   | 0.630797875 |
| Socs5         | 22.854  | 36.231   | 0.630785791 |
| Mgat4a        | 6.008   | 9.526    | 0.63069494  |
| 1300003B13Rik | 2.206   | 3.4985   | 0.630555953 |
| Tmpo          | 6.8585  | 10.877   | 0.630550703 |
| Ptp4a2        | 49.985  | 79.2825  | 0.630467001 |
| Rangap1       | 62.182  | 98.629   | 0.630463657 |
| Eif2b1        | 11.145  | 17.6775  | 0.630462452 |
| Lrrc8a        | 29.1445 | 46.23    | 0.630423967 |
| AW554918      | 4.075   | 6.4645   | 0.630365844 |
| Vamp1         | 68.196  | 108.246  | 0.630009423 |
| Pik3ca        | 8.7245  | 13.849   | 0.629973283 |
| Golga5        | 5.6855  | 9.0255   | 0.6299374   |
| Usf2          | 11.087  | 17.6005  | 0.629925286 |
| Zfp92         | 8.2355  | 13.074   | 0.629914334 |
| Cbln4         | 8.3255  | 13.217   | 0.629908451 |
| Tox4          | 16.966  | 26.9425  | 0.629711422 |

|               |         |         |             |
|---------------|---------|---------|-------------|
| Grfl1         | 51.0965 | 81.145  | 0.629693758 |
| Cbx6          | 15.8835 | 25.23   | 0.629548157 |
| Mavs          | 5.1465  | 8.175   | 0.629541284 |
| Cdh4          | 5.396   | 8.5715  | 0.629528087 |
| Jun           | 9.3195  | 14.8045 | 0.629504543 |
| Exoc6         | 4.2245  | 6.711   | 0.629488899 |
| Srek1ip1      | 16.666  | 26.476  | 0.629475752 |
| Fam160a2      | 5.4415  | 8.65    | 0.629075145 |
| Cpeb3         | 29.0525 | 46.195  | 0.628910055 |
| Cul4b         | 5.8155  | 9.249   | 0.628770678 |
| Abhd2         | 4.7955  | 7.627   | 0.628753114 |
| Atf1          | 11.42   | 18.1655 | 0.628664226 |
| Xrcc5         | 8.3665  | 13.318  | 0.628209941 |
| Trpc5         | 24.037  | 38.275  | 0.628007838 |
| Apba1         | 30.939  | 49.2765 | 0.62786521  |
| Nucks1        | 32.145  | 51.209  | 0.62772169  |
| Tmem201       | 7.6225  | 12.1435 | 0.627702063 |
| Vstm2a        | 47.782  | 76.1305 | 0.627632815 |
| Rab9b         | 33.7135 | 53.719  | 0.627589866 |
| Arhgef10l     | 2.187   | 3.4855  | 0.627456606 |
| Zdhhc4        | 3.8995  | 6.215   | 0.627433628 |
| Grk1          | 1.831   | 2.9185  | 0.627377077 |
| Pitpnb        | 21.7295 | 34.638  | 0.627331255 |
| Gpr26         | 1.1985  | 1.9105  | 0.62732269  |
| Tcea2         | 6.924   | 11.038  | 0.627287552 |
| Pmm2          | 1.926   | 3.0705  | 0.627259404 |
| Ankrd16       | 2.4525  | 3.91    | 0.627237852 |
| Tmem150c      | 16.415  | 26.1705 | 0.627232953 |
| Ppm1d         | 6.636   | 10.58   | 0.627221172 |
| Herc4         | 1.3365  | 2.1315  | 0.627023223 |
| Stat1         | 25.682  | 40.967  | 0.626894818 |
| Rdx           | 11.3605 | 18.122  | 0.626889968 |
| 2510003E04Rik | 40.498  | 64.615  | 0.626758493 |
| Alkbh5        | 8.3045  | 13.2515 | 0.626683772 |
| Hiat1         | 14.2305 | 22.709  | 0.626645823 |
| Igf1r         | 4.1965  | 6.697   | 0.626623861 |
| Ttc5          | 10.738  | 17.1365 | 0.626615703 |
| Cog6          | 8.375   | 13.367  | 0.626542979 |
| Neur11B       | 1.447   | 2.3095  | 0.626542542 |
| 9530077C05Rik | 5.585   | 8.9145  | 0.626507376 |
| 1810074P20Rik | 4.526   | 7.2245  | 0.626479341 |
| Cish          | 1.403   | 2.2395  | 0.626479125 |
| Tax1bp3       | 1.257   | 2.007   | 0.626307922 |
| Adi1          | 49.831  | 79.564  | 0.62630084  |
| Arl6          | 17.469  | 27.8935 | 0.626274939 |
| Zfp354c       | 5.932   | 9.4735  | 0.626167731 |
| Pdhx          | 12.223  | 19.5225 | 0.626098092 |
| Plxnb2        | 2.9895  | 4.776   | 0.625942211 |
| Itpr1         | 5.9965  | 9.58    | 0.625939457 |
| BC022960      | 1.4385  | 2.2985  | 0.625842941 |
| Ebag9         | 20.8735 | 33.353  | 0.625835757 |
| Rapgef3       | 1.972   | 3.151   | 0.625833069 |
| Rfx3          | 6.063   | 9.688   | 0.625825764 |
| Rngtt         | 7.218   | 11.538  | 0.625585023 |
| Sfrp2         | 2.6495  | 4.236   | 0.625472144 |

|               |         |         |             |
|---------------|---------|---------|-------------|
| Frmpd1        | 2.292   | 3.666   | 0.625204583 |
| Dnajc21       | 20.6225 | 32.9865 | 0.625179998 |
| Brcc3         | 12.364  | 19.7795 | 0.625091635 |
| Ppp1r14c      | 5.789   | 9.2615  | 0.625060735 |
| Selenbp1      | 1.419   | 2.2705  | 0.624972473 |
| Ablim2        | 25.0675 | 40.1105 | 0.624961045 |
| Mdm1          | 1.9495  | 3.1195  | 0.624939894 |
| Cyp51         | 8.6895  | 13.9065 | 0.624851688 |
| Clec2g        | 1.84    | 2.945   | 0.624787776 |
| 9130011E15Rik | 3.3855  | 5.419   | 0.624746263 |
| Ncan          | 13.5405 | 21.679  | 0.624590618 |
| Rbms2         | 1.9935  | 3.192   | 0.624530075 |
| Ier5          | 2.9765  | 4.766   | 0.624527906 |
| Clgn          | 1.764   | 2.825   | 0.624424779 |
| Bag4          | 7.1395  | 11.4375 | 0.624218579 |
| Ilvbl         | 1.931   | 3.0935  | 0.624212058 |
| Aagab         | 8.8985  | 14.2585 | 0.62408388  |
| BC024479      | 2.631   | 4.216   | 0.624051233 |
| Sephs1        | 2.932   | 4.6985  | 0.624028945 |
| Arhgef17      | 10.9555 | 17.5575 | 0.623978357 |
| Rai1          | 9.8745  | 15.829  | 0.623823362 |
| Ncor1         | 21.447  | 34.388  | 0.623676864 |
| Mecp2         | 28.381  | 45.5075 | 0.623655441 |
| Cyb5d2        | 5.906   | 9.47    | 0.623653643 |
| LOC100504348  | 5.255   | 8.4275  | 0.623553842 |
| Gabrb2        | 21.292  | 34.1525 | 0.623438987 |
| Btbd3         | 33.699  | 54.059  | 0.623374461 |
| Smcr8         | 10.0825 | 16.1785 | 0.623203634 |
| Rybp          | 11.3075 | 18.145  | 0.623174428 |
| Stag1         | 5.2885  | 8.487   | 0.623129492 |
| Irak1bp1      | 20.5075 | 32.915  | 0.623044205 |
| Mynn          | 4.93    | 7.913   | 0.623025401 |
| Snaip         | 1.8905  | 3.0345  | 0.623002142 |
| Slc16a10      | 14.7445 | 23.6685 | 0.622958785 |
| Fam161b       | 4.1545  | 6.67    | 0.622863568 |
| Mzt1          | 22.735  | 36.5075 | 0.62274875  |
| Ap1s3         | 3.089   | 4.9605  | 0.622719484 |
| Pla2g2d       | 1.5365  | 2.4675  | 0.622695035 |
| Manea         | 3.736   | 6.001   | 0.622562906 |
| Zmat4         | 11.273  | 18.108  | 0.622542523 |
| Ccl25         | 1.6715  | 2.685   | 0.622532588 |
| Nhs12         | 9.5995  | 15.426  | 0.62229353  |
| Pkn1          | 2.3045  | 3.7045  | 0.622081253 |
| Slc36a1       | 7.612   | 12.2385 | 0.621971647 |
| Gtpbp10       | 2.2965  | 3.6925  | 0.621936357 |
| Hsd17b13      | 1.098   | 1.7655  | 0.621920136 |
| Rnf113a2      | 11.493  | 18.4825 | 0.621831462 |
| Ppp1r9b       | 21.719  | 34.942  | 0.621572892 |
| Tmco6         | 2.192   | 3.5275  | 0.62140326  |
| Prkci         | 19.842  | 31.931  | 0.621402399 |
| Pou2f2        | 10.6235 | 17.0965 | 0.621384494 |
| Rmnd1         | 8.903   | 14.3285 | 0.62134906  |
| Iars          | 24.7455 | 39.8255 | 0.621348131 |
| Cckar         | 4.941   | 7.955   | 0.621118793 |
| Hdgfrp3       | 25.306  | 40.747  | 0.621051857 |

|               |          |          |             |
|---------------|----------|----------|-------------|
| LOC100504416  | 12.693   | 20.438   | 0.621049026 |
| Wdr19         | 2.448    | 3.9425   | 0.620925808 |
| Zfp592        | 5.6285   | 9.067    | 0.620767619 |
| 2700078K21Rik | 4.9325   | 7.947    | 0.620674468 |
| Max           | 112.9035 | 181.9545 | 0.620504027 |
| Tnip1         | 4.265    | 6.8735   | 0.620499018 |
| Egr3          | 2.237    | 3.606    | 0.620354964 |
| Cacnb4        | 19.419   | 31.309   | 0.620236993 |
| 2310044G17Rik | 25.8235  | 41.6505  | 0.620004562 |
| Plk3          | 5.479    | 8.841    | 0.619726275 |
| Arcn1         | 23.677   | 38.212   | 0.619622108 |
| Aebp2         | 15.461   | 24.955   | 0.619555199 |
| Cdk2ap1       | 35.8595  | 57.892   | 0.619420645 |
| Usp11         | 9.9895   | 16.129   | 0.619350239 |
| Sh3bp5        | 10.9995  | 17.761   | 0.619306345 |
| Cacng7        | 100.879  | 162.9835 | 0.618952225 |
| Ormdl3        | 9.1035   | 14.7095  | 0.618885754 |
| Rad52         | 8.518    | 13.7655  | 0.61879336  |
| Tpmt          | 3.221    | 5.2055   | 0.61876861  |
| Pcnx          | 8.205    | 13.261   | 0.618731619 |
| Gfpt1         | 19.5205  | 31.559   | 0.618539878 |
| Xpr1          | 38.002   | 61.444   | 0.61848187  |
| Ppp2r5a       | 5.01     | 8.102    | 0.618365836 |
| Gm15453       | 1.112    | 1.799    | 0.618121178 |
| Zfp608        | 7.7605   | 12.557   | 0.61802182  |
| Ireb2         | 3.9315   | 6.362    | 0.617966048 |
| Sirpa         | 32.7765  | 53.045   | 0.617899896 |
| Rasa1         | 5.2335   | 8.4705   | 0.617850186 |
| Chml          | 1.8075   | 2.926    | 0.617737526 |
| Fubp1         | 9.47     | 15.331   | 0.617702694 |
| Dcc           | 3.245    | 5.254    | 0.617624667 |
| 1700009P17Rik | 1.453    | 2.3535   | 0.617378373 |
| Fbxw11        | 25.4605  | 41.24    | 0.617373909 |
| Zfp711        | 1.6505   | 2.6735   | 0.617355526 |
| Ube2h         | 17.1655  | 27.8065  | 0.617319691 |
| Sos2          | 17.5895  | 28.5005  | 0.617164611 |
| Pppde1        | 4.5175   | 7.32     | 0.617144809 |
| Foxo1         | 4.823    | 7.8155   | 0.617107031 |
| Opcml         | 23.953   | 38.825   | 0.616947843 |
| Ermp1         | 5.484    | 8.892    | 0.616734143 |
| Utrn          | 4.2405   | 6.8775   | 0.616575791 |
| Znrf1         | 15.329   | 24.866   | 0.616464248 |
| Dnajc27       | 28.9885  | 47.0255  | 0.616442143 |
| Sema4d        | 7.3335   | 11.898   | 0.616364095 |
| Arl16         | 17.2905  | 28.0525  | 0.616362178 |
| Ash2l         | 9.4785   | 15.3785  | 0.616347498 |
| Pigo          | 1.4505   | 2.3535   | 0.616316125 |
| Cnih2         | 35.806   | 58.0985  | 0.616298183 |
| Pds5b         | 21.431   | 34.7805  | 0.616178606 |
| Dis3l         | 6.3015   | 10.227   | 0.616163098 |
| 9330182L06Rik | 4.05     | 6.573    | 0.616157006 |
| Thoc6         | 1.0535   | 1.71     | 0.616081871 |
| Dck           | 7.094    | 11.515   | 0.616066001 |
| Asb1          | 4.4025   | 7.1465   | 0.616035822 |
| Gpn1          | 6.727    | 10.9205  | 0.615997436 |

|               |          |          |             |
|---------------|----------|----------|-------------|
| Lekr1         | 1.191    | 1.934    | 0.61582213  |
| Ddo           | 2.8665   | 4.655    | 0.615789474 |
| Kctd3         | 10.0435  | 16.311   | 0.615750107 |
| Lingo3        | 2.638    | 4.2855   | 0.615564112 |
| Pot1a         | 6.1875   | 10.052   | 0.615549144 |
| Sertad4       | 8.627    | 14.016   | 0.615510845 |
| Gabpb2        | 1.494    | 2.4275   | 0.615447992 |
| Rpl4          | 483.435  | 785.6025 | 0.615368459 |
| Rnf144b       | 1.8835   | 3.061    | 0.61532179  |
| Atf2          | 86.272   | 140.2485 | 0.615136704 |
| Rrm1          | 1.6605   | 2.6995   | 0.61511391  |
| Fn3krp        | 3.5045   | 5.6975   | 0.61509434  |
| Zfp651        | 1.791    | 2.912    | 0.615041209 |
| Tprkb         | 19.443   | 31.619   | 0.614915083 |
| Cyp2u1        | 1.718    | 2.794    | 0.614889048 |
| Mettl11a      | 4.6155   | 7.5065   | 0.614867115 |
| Rbbp5         | 11.4985  | 18.7025  | 0.614810854 |
| Srebf2        | 11.1335  | 18.114   | 0.614635089 |
| Kcnk10        | 1.59     | 2.587    | 0.614611519 |
| Zfp142        | 7.5345   | 12.26    | 0.614559543 |
| Spock2        | 155.0435 | 252.3205 | 0.614470485 |
| 6030405A18Rik | 3.638    | 5.9215   | 0.614371359 |
| Dclk3         | 2.869    | 4.67     | 0.614346895 |
| Haus8         | 2.2555   | 3.6715   | 0.61432657  |
| Me2           | 13.195   | 21.481   | 0.614263768 |
| Tecpr2        | 4.7235   | 7.6905   | 0.614199337 |
| Nkain1        | 17.6775  | 28.7815  | 0.614196619 |
| Cdh12         | 1.9475   | 3.171    | 0.614159571 |
| Ppp2r1b       | 4.239    | 6.903    | 0.614080834 |
| Msl1          | 46.15    | 75.1545  | 0.614068353 |
| Vps33a        | 15.7915  | 25.7165  | 0.614061011 |
| Fam114a2      | 7.6735   | 12.4965  | 0.614051935 |
| Tcerg1        | 18.1965  | 29.6335  | 0.614051665 |
| Cd47          | 38.092   | 62.0435  | 0.613956337 |
| Till5         | 12.799   | 20.85    | 0.613860911 |
| Jak2          | 3.9425   | 6.423    | 0.613809746 |
| 3110003A17Rik | 3.387    | 5.518    | 0.613809351 |
| Slu7          | 10.2495  | 16.703   | 0.613632282 |
| Uhmk1         | 24.7985  | 40.422   | 0.613490179 |
| Kank4         | 1.1635   | 1.897    | 0.613336848 |
| Jph4          | 55.651   | 90.736   | 0.613328778 |
| Ube2q2        | 11.0645  | 18.0465  | 0.613110575 |
| 8430410K20Rik | 16.5395  | 26.9855  | 0.612903226 |
| Bysl          | 4.1655   | 6.797    | 0.612843902 |
| Nob1          | 5.1565   | 8.4145   | 0.612811219 |
| Aldh6a1       | 4.5745   | 7.467    | 0.6126289   |
| Nbea          | 17.129   | 27.97    | 0.612406149 |
| Jmjd1c        | 8.66     | 14.1445  | 0.612252112 |
| Kenma1        | 11.118   | 18.161   | 0.612190959 |
| Fam117b       | 20.221   | 33.033   | 0.61214543  |
| D730040F13Rik | 5.948    | 9.7185   | 0.612028605 |
| Stx5a         | 13.7205  | 22.4245  | 0.611853107 |
| Lemd1         | 1.4935   | 2.4415   | 0.61171411  |
| Trp53inp2     | 31.959   | 52.253   | 0.611620385 |
| Snap25        | 2667.824 | 4362.671 | 0.611511618 |

|               |         |          |             |
|---------------|---------|----------|-------------|
| Lxn           | 17.8415 | 29.179   | 0.611450015 |
| Crcp          | 15.6095 | 25.5295  | 0.611429914 |
| Ythdf1        | 14.8955 | 24.3725  | 0.611160119 |
| Ghra3         | 3.601   | 5.893    | 0.611063974 |
| 1700081L11Rik | 19.942  | 32.6365  | 0.611033659 |
| Kent2         | 2.229   | 3.648    | 0.611019737 |
| Tbc1d13       | 5.981   | 9.789    | 0.61099193  |
| Arhgap12      | 5.5535  | 9.0895   | 0.610979702 |
| Hmmr          | 7.965   | 13.037   | 0.61095344  |
| Hdac8         | 2.9125  | 4.768    | 0.610843121 |
| Cmpk2         | 8.193   | 13.414   | 0.610779782 |
| BC005561      | 1.3645  | 2.2345   | 0.610651152 |
| Aig1          | 5.3285  | 8.7265   | 0.610611356 |
| Zfp161        | 9.1275  | 14.949   | 0.610575958 |
| Iqsec3        | 31.2765 | 51.226   | 0.610559091 |
| Tspyl2        | 132.864 | 217.611  | 0.610557371 |
| Arhgef9       | 54.8085 | 89.7705  | 0.610540211 |
| Pik3cb        | 4.364   | 7.149    | 0.610435026 |
| Npy           | 3.491   | 5.719    | 0.610421402 |
| Elk1          | 8.8445  | 14.49    | 0.610386473 |
| Atl3          | 4.0945  | 6.7085   | 0.610345085 |
| Nbas          | 4.8065  | 7.8805   | 0.609923228 |
| Phf20         | 13.1755 | 21.604   | 0.609863914 |
| Foxo3         | 14.389  | 23.6015  | 0.60966464  |
| Senp7         | 15.9535 | 26.172   | 0.609563656 |
| Rapgef4       | 12.4675 | 20.4535  | 0.609553377 |
| Cnih4         | 6.3445  | 10.4095  | 0.60949133  |
| Npm1          | 283.232 | 464.7385 | 0.609443805 |
| Cpne1         | 6.048   | 9.926    | 0.609308886 |
| Dnajc24       | 4.217   | 6.9215   | 0.609260998 |
| Gm2573        | 1.049   | 1.722    | 0.609175377 |
| Rev3l         | 5.8525  | 9.608    | 0.60912781  |
| Rrp1          | 133.39  | 218.996  | 0.609097883 |
| Mycbp2        | 23.3655 | 38.3615  | 0.609087236 |
| Fam125b       | 18.086  | 29.694   | 0.609079275 |
| Ccdc132       | 7.8685  | 12.922   | 0.608922767 |
| Arhgap39      | 9.5375  | 15.6645  | 0.6088608   |
| Tmem90a       | 1.7375  | 2.854    | 0.608794674 |
| Gm10457       | 1.0295  | 1.6915   | 0.608631392 |
| Bzrap1        | 4.5175  | 7.4225   | 0.608622432 |
| Dus2l         | 5.1915  | 8.5305   | 0.608580974 |
| Atp8a2        | 6.5975  | 10.842   | 0.608513189 |
| Calb1         | 14.5425 | 23.902   | 0.608421889 |
| Gm8966        | 3.085   | 5.0705   | 0.60842126  |
| Setd5         | 41.6855 | 68.5525  | 0.608081397 |
| Gprin3        | 5.63    | 9.2595   | 0.608024191 |
| Wnk2          | 11.1235 | 18.3005  | 0.607824923 |
| Metap1d       | 5.6625  | 9.3165   | 0.607792626 |
| Slc7a11       | 2.427   | 3.9935   | 0.607737574 |
| Mbd4          | 3.053   | 5.025    | 0.607562189 |
| Ehd3          | 25.0495 | 41.2395  | 0.607415221 |
| Lpgat1        | 22.0915 | 36.376   | 0.607309765 |
| 1700066M21Rik | 2.324   | 3.827    | 0.607264176 |
| Etaa1         | 1.224   | 2.0165   | 0.606992313 |
| Ept1          | 5.5415  | 9.13     | 0.606955093 |

|               |         |         |             |
|---------------|---------|---------|-------------|
| Tmem41b       | 5.79    | 9.541   | 0.606854627 |
| Xrn1          | 3.3245  | 5.479   | 0.606771309 |
| E430025E21Rik | 11.5445 | 19.0285 | 0.60669522  |
| Qtrtd1        | 1.7685  | 2.9155  | 0.606585491 |
| Rhoa          | 52.11   | 85.914  | 0.606536769 |
| Grasp         | 2.817   | 4.6445  | 0.606523845 |
| Trmt6         | 4.037   | 6.656   | 0.606520433 |
| Pitpnm2       | 4.4865  | 7.398   | 0.606447689 |
| Fam110b       | 7.489   | 12.3495 | 0.606421313 |
| Snx5          | 20.424  | 33.686  | 0.60630529  |
| Lrrc3b        | 4.6075  | 7.5995  | 0.606289887 |
| Spsb3         | 4.5335  | 7.478   | 0.606244985 |
| Stk39         | 23.4415 | 38.6755 | 0.606107226 |
| Cyp2s1        | 4.169   | 6.8795  | 0.606003343 |
| Mage12        | 5.6515  | 9.326   | 0.605993995 |
| D14Erttd449e  | 1.7975  | 2.9665  | 0.605932918 |
| Cep76         | 1.721   | 2.841   | 0.605772615 |
| Nploc4        | 10.473  | 17.3015 | 0.605323238 |
| Banp          | 4.377   | 7.231   | 0.605310469 |
| Dicer1        | 5.3345  | 8.813   | 0.60529899  |
| Slc9a3r2      | 16.4765 | 27.2285 | 0.605119636 |
| Kdm5d         | 1.6805  | 2.7775  | 0.605040504 |
| Cdc14b        | 4.406   | 7.2835  | 0.604928949 |
| Phip          | 3.6625  | 6.0545  | 0.604921959 |
| Btaf1         | 2.082   | 3.442   | 0.604880883 |
| Fam59a        | 3.3535  | 5.545   | 0.60477908  |
| Ovca2         | 2.449   | 4.0495  | 0.60476602  |
| Slc1a1        | 15.586  | 25.7735 | 0.604729664 |
| Acap3         | 3.6025  | 5.9585  | 0.604598473 |
| Hexa          | 5.3515  | 8.8525  | 0.604518498 |
| Fus           | 50.9625 | 84.304  | 0.604508683 |
| Snx19         | 3.6635  | 6.061   | 0.604438212 |
| Macf1         | 12.7335 | 21.079  | 0.604084634 |
| Erp44         | 4.05    | 6.705   | 0.604026846 |
| Bbs2          | 9.683   | 16.033  | 0.60394187  |
| Npas2         | 2.428   | 4.0205  | 0.603904987 |
| Taok2         | 13.97   | 23.1365 | 0.603807836 |
| BC029214      | 7.3525  | 12.1775 | 0.603777458 |
| Nubp2         | 6.3945  | 10.5915 | 0.603738847 |
| Usp45         | 7.3735  | 12.2215 | 0.603322014 |
| C230072F16Rik | 6.8845  | 11.413  | 0.603215631 |
| Crk           | 11.155  | 18.493  | 0.603201211 |
| Rbm25         | 22.7275 | 37.6795 | 0.603179448 |
| Cbl11         | 18.095  | 29.9995 | 0.60317672  |
| Dock3         | 14.4615 | 23.976  | 0.603165666 |
| Prmt5         | 13.9555 | 23.138  | 0.603142017 |
| Dnaja1        | 44.688  | 74.1315 | 0.602820663 |
| Slmap         | 21.7185 | 36.032  | 0.602755884 |
| Tmem29        | 10.2515 | 17.0095 | 0.602692613 |
| BC024659      | 18.6665 | 30.9745 | 0.602640882 |
| Tab3          | 2.5145  | 4.1725  | 0.602636309 |
| Fhit          | 1.6555  | 2.7475  | 0.602547771 |
| Elmo2         | 11.1965 | 18.583  | 0.60251305  |
| Hlf           | 19.481  | 32.337  | 0.602436837 |
| Trim24        | 11.1185 | 18.4565 | 0.602416493 |



|               |         |          |             |
|---------------|---------|----------|-------------|
| LOC100502795  | 5.4545  | 9.055    | 0.602374379 |
| Srebf1        | 2.8705  | 4.766    | 0.602287033 |
| Lnpep         | 8.4865  | 14.092   | 0.602221118 |
| Ankrd24       | 2.286   | 3.796    | 0.602212856 |
| Fam3c         | 9.4075  | 15.6235  | 0.602137805 |
| Coro1c        | 30.034  | 49.8965  | 0.601925987 |
| Matk          | 9.524   | 15.8235  | 0.601889595 |
| 2310046O06Rik | 3.29    | 5.4685   | 0.601627503 |
| Gramd4        | 3.161   | 5.2545   | 0.601579598 |
| Sumf2         | 4.969   | 8.26     | 0.60157385  |
| Whsc111       | 21.112  | 35.098   | 0.601515756 |
| Hbegf         | 1.1555  | 1.922    | 0.60119667  |
| Zfp157        | 2.1415  | 3.5625   | 0.601122807 |
| Papd4         | 2.048   | 3.407    | 0.601115351 |
| Tmem123       | 1.011   | 1.682    | 0.601070155 |
| Aldh7a1       | 4.594   | 7.6445   | 0.600954935 |
| Ly6g6c        | 1.8925  | 3.1495   | 0.60088903  |
| Aste1         | 1.5025  | 2.5005   | 0.600879824 |
| Cdkl3         | 5.878   | 9.786    | 0.600653996 |
| Arhgap31      | 1.7785  | 2.961    | 0.600641675 |
| Tmem138       | 3.7625  | 6.2645   | 0.600606593 |
| Rnf212        | 5.72    | 9.525    | 0.600524934 |
| Phkg2         | 14.621  | 24.3535  | 0.600365451 |
| Atrip         | 4.5535  | 7.586    | 0.600250461 |
| Aars2         | 1.0045  | 1.6735   | 0.60023902  |
| Lgi3          | 12.983  | 21.636   | 0.600064707 |
| Acad11        | 2.3845  | 3.9745   | 0.599949679 |
| Sesn3         | 45.0945 | 75.2055  | 0.599617049 |
| Eif4g2        | 69.5695 | 116.034  | 0.599561335 |
| Dennd5b       | 8.557   | 14.2765  | 0.599376598 |
| Napepld       | 12.517  | 20.8845  | 0.599344011 |
| Hdac11        | 89.0665 | 148.6075 | 0.599340545 |
| Plcx1         | 2.135   | 3.563    | 0.599214145 |
| 1700052N19Rik | 3.075   | 5.132    | 0.599181606 |
| Idh2          | 6.318   | 10.545   | 0.599146515 |
| Marcks        | 26.593  | 44.3935  | 0.599029137 |
| Akirin1       | 24.7935 | 41.39    | 0.599021503 |
| Ghdc          | 3.658   | 6.107    | 0.598984772 |
| Dnajc18       | 28.1835 | 47.053   | 0.598973498 |
| Pik3cd        | 1.002   | 1.673    | 0.598924088 |
| Lrrc14b       | 2.8965  | 4.8365   | 0.59888349  |
| Clint1        | 24.633  | 41.133   | 0.598862227 |
| Ccny          | 12.3795 | 20.6735  | 0.598810071 |
| Rnf214        | 14.949  | 24.966   | 0.598774333 |
| Gopc          | 9.8645  | 16.4755  | 0.598737519 |
| Smpd3         | 2.3685  | 3.956    | 0.598710819 |
| Zmynd11       | 41.207  | 68.8265  | 0.598708346 |
| Fkbp5         | 3.9115  | 6.535    | 0.598546289 |
| Zfp763        | 1.9305  | 3.2255   | 0.598511859 |
| Nfxl1         | 1.0605  | 1.772    | 0.598476298 |
| Uggt2         | 1.907   | 3.1875   | 0.59827451  |
| Senp1         | 5.1355  | 8.5855   | 0.598159688 |
| Slc7a1        | 4.809   | 8.0405   | 0.598097133 |
| Shc2          | 7.695   | 12.8665  | 0.598064742 |
| Rnf115        | 8.723   | 14.586   | 0.598039216 |

|                |         |          |             |
|----------------|---------|----------|-------------|
| Tor3a          | 1.089   | 1.821    | 0.598023064 |
| Dock11         | 1.1285  | 1.8875   | 0.597880795 |
| Scn3a          | 7.8265  | 13.091   | 0.597853487 |
| Ctcf           | 14.34   | 23.986   | 0.597848745 |
| Maoa           | 7.1935  | 12.035   | 0.597714998 |
| Cacnb3         | 19.48   | 32.5945  | 0.597646842 |
| Plat           | 2.023   | 3.385    | 0.597636632 |
| Zfp882         | 2.568   | 4.297    | 0.597626251 |
| Clip1          | 19.064  | 31.901   | 0.597598821 |
| Mmp16          | 4.1355  | 6.9215   | 0.597486094 |
| Gclc           | 10.618  | 17.773   | 0.597423057 |
| Ogfr           | 1.8555  | 3.1065   | 0.597295992 |
| Mapkap1        | 11.247  | 18.8335  | 0.597180556 |
| Ankrd29        | 4.6435  | 7.777    | 0.597081137 |
| Nhej1          | 2.269   | 3.801    | 0.596948172 |
| Slc39a14       | 2.5755  | 4.3145   | 0.596940549 |
| 5730409E04Rik  | 20.3285 | 34.0545  | 0.596940199 |
| Zfp518b        | 4.0635  | 6.808    | 0.596871328 |
| Tollip         | 21.29   | 35.6755  | 0.59676809  |
| Psen1          | 8.6015  | 14.4165  | 0.596642736 |
| 2410091C18Rik  | 15.5565 | 26.078   | 0.596537311 |
| Mmd            | 9.0905  | 15.239   | 0.596528644 |
| Actn2          | 1.7035  | 2.856    | 0.596463585 |
| Shoc2          | 39.1845 | 65.6955  | 0.596456378 |
| Arid3b         | 1.209   | 2.027    | 0.596447953 |
| Trpc3          | 1.3965  | 2.3415   | 0.596412556 |
| Fam177a        | 9.5315  | 15.9835  | 0.596333719 |
| 1700047117Rik2 | 9.5315  | 15.9835  | 0.596333719 |
| Tbl2           | 3.5845  | 6.0115   | 0.596273809 |
| Ctsd           | 71.621  | 120.1155 | 0.596267759 |
| Gira1          | 2.628   | 4.408    | 0.596188748 |
| Ifi2712a       | 7.1005  | 11.9105  | 0.596154653 |
| Nup98          | 5.0955  | 8.5485   | 0.596069486 |
| Usp4           | 9.284   | 15.577   | 0.596006933 |
| Rbak           | 1.959   | 3.287    | 0.59598418  |
| Rab11fip2      | 4.877   | 8.1845   | 0.595882461 |
| Trak2          | 7.702   | 12.926   | 0.595853319 |
| Ctsz           | 2.724   | 4.5725   | 0.595735375 |
| Kif1b          | 48.0305 | 80.626   | 0.595719743 |
| Pes1           | 4.5495  | 7.638    | 0.59564022  |
| Fat1           | 4.1695  | 7.0025   | 0.595430203 |
| Hdac7          | 1.9585  | 3.2895   | 0.595379237 |
| Mmp17          | 12.1945 | 20.4855  | 0.595274707 |
| Zfand6         | 3.8215  | 6.42     | 0.595249221 |
| Fam73a         | 8.579   | 14.4145  | 0.595164591 |
| Pgm1           | 1.5645  | 2.629    | 0.595093191 |
| Zfp697         | 1.615   | 2.7145   | 0.59495303  |
| Ddhd1          | 16.511  | 27.752   | 0.594948112 |
| Nup11          | 21.464  | 36.0845  | 0.594826033 |
| Unc80          | 22.324  | 37.531   | 0.594814953 |
| Spin1          | 89.4815 | 150.441  | 0.594794637 |
| Slc35e1        | 5.769   | 9.6995   | 0.594772926 |
| Dcaf7          | 39.195  | 65.901   | 0.59475577  |
| Cux1           | 26.387  | 44.3925  | 0.594402208 |
| Mettl10        | 5.9465  | 10.0045  | 0.594382528 |

|               |          |         |             |
|---------------|----------|---------|-------------|
| Cst3          | 250.0975 | 420.772 | 0.594377715 |
| Dbpht2        | 14.209   | 23.9065 | 0.594357183 |
| Pcsk2         | 13.755   | 23.1445 | 0.594309663 |
| Plxnc1        | 10.084   | 16.968  | 0.594295144 |
| Oasl2         | 24.4885  | 41.21   | 0.594236836 |
| Ube2r2        | 49.327   | 83.0155 | 0.594190242 |
| Wdr59         | 6.241    | 10.5035 | 0.594182891 |
| D19Wsu162e    | 6.547    | 11.0195 | 0.59412859  |
| Trim39        | 5.302    | 8.9245  | 0.594094907 |
| Ttc38         | 4.2195   | 7.104   | 0.593961149 |
| Anks3         | 2.6705   | 4.4965  | 0.593906372 |
| Ncoa5         | 8.8655   | 14.929  | 0.593844196 |
| Sc5d          | 9.186    | 15.4715 | 0.593736871 |
| 2700007P21Rik | 16.097   | 27.112  | 0.593722337 |
| Klhdc10       | 43.545   | 73.349  | 0.593668625 |
| Gtdc1         | 13.938   | 23.4905 | 0.593346246 |
| Bmp2k         | 3.319    | 5.5995  | 0.592731494 |
| Gnpnat1       | 1.9975   | 3.37    | 0.59272997  |
| Phf15         | 6.635    | 11.1945 | 0.592701773 |
| Cask          | 13.97    | 23.573  | 0.592627158 |
| D10Ert610e    | 7.791    | 13.149  | 0.592516541 |
| Dcaf10        | 3.183    | 5.373   | 0.592406477 |
| L3mbtl2       | 7.2715   | 12.275  | 0.592382892 |
| Tanc1         | 1.354    | 2.286   | 0.592300962 |
| Pigv          | 3.4335   | 5.7975  | 0.592238034 |
| Tmx4          | 48.753   | 82.327  | 0.592187253 |
| Memo1         | 6.992    | 11.81   | 0.592040644 |
| Ddit3         | 7.326    | 12.3765 | 0.591928251 |
| Cdv3          | 16.8165  | 28.414  | 0.59183853  |
| Ube2c         | 5.383    | 9.0975  | 0.591701017 |
| Sec24c        | 13.5685  | 22.9345 | 0.591619612 |
| Phf6          | 4.3215   | 7.3055  | 0.59154062  |
| Trim43b       | 2.034    | 3.439   | 0.591451003 |
| Gdap1         | 23.0675  | 39.006  | 0.591383377 |
| Inpp5b        | 6.895    | 11.661  | 0.591287197 |
| Rfxank        | 2.001    | 3.3855  | 0.591050066 |
| Dgkq          | 5.6705   | 9.5955  | 0.590954093 |
| Fam19a2       | 4.994    | 8.453   | 0.590796167 |
| Stk24         | 24.501   | 41.4955 | 0.590449567 |
| Ddx55         | 6.1715   | 10.4545 | 0.590319958 |
| Neto1         | 28.652   | 48.551  | 0.590142325 |
| Akap8l        | 6.675    | 11.312  | 0.59008133  |
| Nova1         | 26.989   | 45.745  | 0.589987977 |
| Sf3a2         | 5.414    | 9.179   | 0.5898246   |
| Rap1a         | 19.1445  | 32.4585 | 0.589814686 |
| Nup160        | 1.4845   | 2.517   | 0.589789432 |
| Gm13004       | 22.3225  | 37.8495 | 0.58977001  |
| Maf           | 2.6725   | 4.532   | 0.589695499 |
| Arl4a         | 4.8865   | 8.289   | 0.589516226 |
| Acvr1b        | 10.9105  | 18.52   | 0.58911987  |
| 2010111I01Rik | 1.405    | 2.385   | 0.589098532 |
| Eif3l         | 21.1085  | 35.839  | 0.588981277 |
| D10627        | 2.754    | 4.676   | 0.588964927 |
| Ecd           | 5.7715   | 9.8025  | 0.588778373 |
| Tspan17       | 8.5045   | 14.446  | 0.588709677 |

|               |         |         |             |
|---------------|---------|---------|-------------|
| Ralbp1        | 27.0865 | 46.012  | 0.588683387 |
| Veph1         | 1.053   | 1.789   | 0.588596982 |
| Rbm26         | 14.2885 | 24.28   | 0.588488468 |
| Crx           | 1.7385  | 2.956   | 0.588125846 |
| Pptc7         | 29.5535 | 50.2505 | 0.588123501 |
| Cull1         | 21.1895 | 36.044  | 0.587878704 |
| Syncrip       | 11.747  | 19.9845 | 0.587805549 |
| C1ql3         | 4.704   | 8.003   | 0.587779583 |
| Fam110a       | 5.0115  | 8.5265  | 0.58775582  |
| Ints6         | 3.7345  | 6.3545  | 0.58769376  |
| Dpagt1        | 2.9025  | 4.939   | 0.587669569 |
| Papd5         | 12.5385 | 21.3395 | 0.587572342 |
| Elac1         | 10.1065 | 17.2085 | 0.587296975 |
| Jmy           | 5.6615  | 9.645   | 0.586988077 |
| Atxn7l3b      | 47.6815 | 81.245  | 0.586885347 |
| Fgf5          | 6.0975  | 10.392  | 0.586749423 |
| Epha5         | 4.4625  | 7.6055  | 0.586746434 |
| Mfap1a        | 33.287  | 56.7425 | 0.586632595 |
| Szt2          | 1.762   | 3.0045  | 0.586453653 |
| Ptprr         | 3.8065  | 6.4915  | 0.586382192 |
| Pdgfa         | 37.107  | 63.2865 | 0.586333578 |
| Slc25a24      | 1.1395  | 1.944   | 0.586162551 |
| Zfp187        | 22.9715 | 39.1975 | 0.586045028 |
| Ccdc86        | 1.0485  | 1.7895  | 0.585917854 |
| Cpox          | 14.432  | 24.642  | 0.585666748 |
| Med13         | 6.972   | 11.907  | 0.585537919 |
| Trmt12        | 2.7535  | 4.703   | 0.585477355 |
| Tmco3         | 3.38    | 5.7735  | 0.585433446 |
| Pmepa1        | 7.282   | 12.4395 | 0.585393304 |
| Ears2         | 1.0405  | 1.7775  | 0.585372714 |
| Pcyt1b        | 7.37    | 12.5905 | 0.585361979 |
| Utp11l        | 19.672  | 33.613  | 0.585249755 |
| Wwp1          | 6.443   | 11.0095 | 0.585221854 |
| Ptk2          | 5.2675  | 9.001   | 0.585212754 |
| Atrn          | 13.9335 | 23.812  | 0.585146145 |
| Plekha8       | 1.3645  | 2.3325  | 0.584994641 |
| 1810063B07Rik | 2.072   | 3.5425  | 0.584897671 |
| Clcn7         | 2.689   | 4.5975  | 0.584883089 |
| Igsf1         | 3.494   | 5.974   | 0.58486776  |
| Shprh         | 4.009   | 6.858   | 0.584572762 |
| Ndfip2        | 13.3575 | 22.8515 | 0.584534932 |
| Till12        | 3.6575  | 6.259   | 0.584358524 |
| Asl           | 7.8795  | 13.4845 | 0.584337573 |
| Flrt2         | 5.061   | 8.6635  | 0.584174987 |
| Robo2         | 3.1805  | 5.4445  | 0.584167508 |
| Dcaf6         | 12.136  | 20.7785 | 0.58406526  |
| Rasal2        | 9.1045  | 15.591  | 0.583958694 |
| Hnrnph2       | 21.3235 | 36.531  | 0.583709726 |
| Srsf11        | 19.1185 | 32.756  | 0.583664062 |
| Hcfc1         | 15.151  | 25.9595 | 0.583639901 |
| 1700007K13Rik | 1.2675  | 2.1725  | 0.583429229 |
| Usp8          | 42.562  | 72.96   | 0.583360746 |
| 2810026P18Rik | 5.3745  | 9.217   | 0.583107302 |
| Zfp629        | 2.709   | 4.646   | 0.583082221 |
| Sox5          | 2.9915  | 5.1305  | 0.583081571 |

|               |         |         |             |
|---------------|---------|---------|-------------|
| Dnajc5        | 79.986  | 137.207 | 0.582958595 |
| Adam22        | 20.9135 | 35.8805 | 0.582865345 |
| Zdhhc18       | 3.3615  | 5.768   | 0.582784327 |
| Pvrl3         | 3.634   | 6.237   | 0.582651916 |
| Nr1h2         | 9.8715  | 16.944  | 0.582595609 |
| Sash1         | 9.2575  | 15.8905 | 0.582580787 |
| Foxred1       | 4.885   | 8.3855  | 0.582553217 |
| Ldlr          | 2.377   | 4.0805  | 0.582526651 |
| Lmf1          | 5.1135  | 8.779   | 0.58246953  |
| Cit           | 14.146  | 24.2865 | 0.582463509 |
| Sik2          | 13.232  | 22.719  | 0.582420001 |
| Gm5621        | 3.0095  | 5.1675  | 0.582389937 |
| Snx27         | 33.05   | 56.756  | 0.582317288 |
| Crebl2        | 13.301  | 22.843  | 0.582279035 |
| 0610010F05Rik | 4.9605  | 8.5195  | 0.58225248  |
| Abi2          | 34.536  | 59.323  | 0.582168805 |
| Cd68          | 3.22    | 5.533   | 0.581962769 |
| Cytsa         | 7.9165  | 13.6035 | 0.581945823 |
| Smyd3         | 19.7585 | 33.956  | 0.581885381 |
| Zfp9          | 13.545  | 23.292  | 0.581530139 |
| Usp6nl        | 7.3715  | 12.6765 | 0.581509092 |
| BC057079      | 4.5645  | 7.851   | 0.581390906 |
| Chst15        | 2.2245  | 3.8265  | 0.581340651 |
| Pacsin2       | 14.6715 | 25.2405 | 0.5812682   |
| Wdr4          | 1.8945  | 3.2595  | 0.581224114 |
| Naa30         | 4.8895  | 8.4185  | 0.580804181 |
| Ehbp111       | 2.2955  | 3.9525  | 0.580771664 |
| Spats2        | 4.1595  | 7.163   | 0.580692447 |
| Hook2         | 1.4995  | 2.5825  | 0.580638916 |
| Rnf168        | 11.3225 | 19.504  | 0.580521944 |
| 1110002B05Rik | 5.0915  | 8.771   | 0.580492532 |
| Zfp825        | 11.465  | 19.7615 | 0.580168509 |
| Atxn2l        | 29.815  | 51.3985 | 0.580075294 |
| Ttc39b        | 6.211   | 10.7085 | 0.580006537 |
| Arhgef12      | 34.8885 | 60.152  | 0.580005652 |
| Ankfy1        | 5.3375  | 9.205   | 0.579847909 |
| Zfp27         | 4.7065  | 8.1185  | 0.579725319 |
| Ski           | 18.4875 | 31.8925 | 0.579681743 |
| Tes           | 1.111   | 1.917   | 0.579551382 |
| Gorasp1       | 4.5155  | 7.7915  | 0.579541808 |
| Hps4          | 1.7275  | 2.9825  | 0.57921207  |
| Pkia          | 40.0775 | 69.1945 | 0.579200659 |
| Rnf2          | 3.3975  | 5.8665  | 0.579135771 |
| Clip4         | 9.452   | 16.3235 | 0.579042485 |
| Tpr           | 23.184  | 40.043  | 0.578977599 |
| Fam114a1      | 1.533   | 2.6485  | 0.578818199 |
| 8430406I07Rik | 1.3985  | 2.417   | 0.578609847 |
| Hectd2        | 2.5695  | 4.441   | 0.578585904 |
| Snpc4         | 2.6115  | 4.514   | 0.578533451 |
| Fbxl3         | 11.9415 | 20.642  | 0.57850499  |
| Smpd2         | 2.328   | 4.0245  | 0.578456951 |
| Nampt         | 6.196   | 10.7115 | 0.578443729 |
| Dnase1        | 1.486   | 2.569   | 0.578435189 |
| Rad18         | 4.6665  | 8.0685  | 0.57836029  |
| Qrich1        | 25.79   | 44.593  | 0.578341892 |

|               |         |         |             |
|---------------|---------|---------|-------------|
| Pfn4          | 2.5775  | 4.458   | 0.578174069 |
| Prdm4         | 5.0085  | 8.6635  | 0.578115081 |
| Luzp1         | 11.7905 | 20.395  | 0.578107379 |
| Hsd17b10      | 20.9935 | 36.328  | 0.57788758  |
| Cd164         | 13.429  | 23.239  | 0.577864796 |
| Tmed8         | 9.5655  | 16.5585 | 0.577679138 |
| Bcor11        | 3.248   | 5.6225  | 0.577678968 |
| Mnat1         | 4.4875  | 7.7685  | 0.577653344 |
| Prkab1        | 2.796   | 4.844   | 0.577208918 |
| Rims1         | 13.474  | 23.345  | 0.577168559 |
| C030039L03Rik | 1.9225  | 3.331   | 0.577154008 |
| Sgpp2         | 6.1375  | 10.6355 | 0.577076771 |
| Eif2s3y       | 1.676   | 2.905   | 0.576936317 |
| Cir1          | 24.1475 | 41.8615 | 0.576842684 |
| B230219D22Rik | 17.191  | 29.804  | 0.576801772 |
| Ttc19         | 7.768   | 13.4675 | 0.57679599  |
| Trim46        | 9.2875  | 16.1085 | 0.57655896  |
| Snx10         | 22.194  | 38.4965 | 0.576519943 |
| Cd247         | 1.9115  | 3.316   | 0.576447527 |
| Abcc5         | 10.484  | 18.189  | 0.576392325 |
| Gm4944        | 1.7625  | 3.058   | 0.576357096 |
| Ak4           | 7.6375  | 13.258  | 0.57606728  |
| Ubfd1         | 40.2925 | 69.9535 | 0.575989765 |
| Ep300         | 17.53   | 30.4535 | 0.575631701 |
| Mfsd6         | 38.3855 | 66.692  | 0.575563786 |
| A130042E20Rik | 3.002   | 5.2165  | 0.575481645 |
| Pdzd8         | 9.558   | 16.612  | 0.575367204 |
| Mbd6          | 4.155   | 7.223   | 0.575245743 |
| Sfi1          | 1.2215  | 2.1235  | 0.575229574 |
| Gm3187        | 1.2175  | 2.117   | 0.575106282 |
| Fam45a        | 6.017   | 10.4625 | 0.575101553 |
| Trim45        | 2.1315  | 3.7065  | 0.575070822 |
| Ralgps1       | 5.63    | 9.7925  | 0.574929793 |
| Dand5         | 7.6235  | 13.266  | 0.574664556 |
| LOC100504405  | 1.7665  | 3.0745  | 0.57456497  |
| Ppig          | 14.35   | 24.976  | 0.57455157  |
| Rcan3         | 28.7105 | 50.024  | 0.573934511 |
| 2510009E07Rik | 12.318  | 21.4635 | 0.573904536 |
| Tef           | 15.2005 | 26.49   | 0.57382031  |
| 2010002M12Rik | 1.137   | 1.982   | 0.573662967 |
| Kcmf1         | 34.624  | 60.366  | 0.573567902 |
| LOC100502986  | 1.6545  | 2.885   | 0.573483536 |
| Pitpnm3       | 7.8185  | 13.6345 | 0.573435036 |
| Pde1c         | 2.4255  | 4.23    | 0.573404255 |
| Gm2897        | 1.746   | 3.0465  | 0.573116691 |
| Pggt1b        | 1.9735  | 3.4445  | 0.572942372 |
| Mtss11        | 51.983  | 90.7315 | 0.572932223 |
| Stard3        | 1.819   | 3.175   | 0.572913386 |
| Rfc2          | 4.451   | 7.77    | 0.572844273 |
| Trim11        | 1.7265  | 3.014   | 0.572826808 |
| Pde1a         | 19.943  | 34.817  | 0.572794899 |
| Fiz1          | 3.679   | 6.423   | 0.572785303 |
| Lsm14a        | 22.7495 | 39.7235 | 0.572696263 |
| Mrps6         | 22.491  | 39.2735 | 0.572676232 |
| Tbc1d30       | 9.762   | 17.051  | 0.572517741 |

|               |          |         |             |
|---------------|----------|---------|-------------|
| Ankrd45       | 9.421    | 16.4595 | 0.572374616 |
| Tspan9        | 2.1715   | 3.794   | 0.572351081 |
| Vegfb         | 32.3495  | 56.5385 | 0.572167638 |
| Cpeb2         | 12.3955  | 21.665  | 0.572144011 |
| 2410066E13Rik | 9.3215   | 16.2925 | 0.572134418 |
| Pim3          | 5.7535   | 10.057  | 0.572089092 |
| Zfp719        | 7.8235   | 13.678  | 0.571976897 |
| Ipo9          | 12.8245  | 22.4235 | 0.571922314 |
| Ppapdc1a      | 1.67     | 2.92    | 0.571917808 |
| Wdtd1         | 10.218   | 17.868  | 0.571860309 |
| Dek           | 12.457   | 21.7925 | 0.571618676 |
| Ttc15         | 20.343   | 35.5885 | 0.571617236 |
| Hsd12         | 12.456   | 21.792  | 0.571585903 |
| Zfand2a       | 41.6585  | 72.894  | 0.571494224 |
| Znrf2         | 2.766    | 4.8405  | 0.571428571 |
| Sgms1         | 6.229    | 10.9025 | 0.571336849 |
| D630037F22Rik | 1.028    | 1.7995  | 0.571269797 |
| D630045J12Rik | 5.634    | 9.865   | 0.571109985 |
| 1110036O03Rik | 3.1005   | 5.4295  | 0.571047058 |
| Klf11         | 4.1      | 7.18    | 0.571030641 |
| Eif3a         | 24.6425  | 43.167  | 0.570864318 |
| Ero11         | 13.2485  | 23.2085 | 0.570846888 |
| Gpr75         | 8.036    | 14.0795 | 0.570758905 |
| Chd2          | 8.582    | 15.048  | 0.570308347 |
| Wnk3-ps       | 12.359   | 21.671  | 0.570301324 |
| Stard4        | 2.6005   | 4.561   | 0.570160053 |
| Fxr1          | 21.141   | 37.087  | 0.570038019 |
| Ndst1         | 8.4195   | 14.7715 | 0.569982737 |
| Dip2c         | 10.8715  | 19.0755 | 0.56991953  |
| Zfp574        | 10.0155  | 17.574  | 0.569904404 |
| Dennd1a       | 11.586   | 20.339  | 0.569644525 |
| Nrf1          | 6.97     | 12.238  | 0.569537506 |
| Dbi           | 183.7725 | 322.672 | 0.569533458 |
| Apip          | 9.2485   | 16.244  | 0.569348683 |
| 4933424B01Rik | 2.831    | 4.9735  | 0.569216849 |
| Slc24a5       | 4.334    | 7.614   | 0.569214605 |
| Ikbip         | 5.4025   | 9.4915  | 0.569193489 |
| Nufip1        | 4.5375   | 7.9735  | 0.569072553 |
| Zufsp         | 1.3805   | 2.4265  | 0.568926437 |
| Prmt3         | 6.327    | 11.121  | 0.568923658 |
| Slc16a1       | 1.75     | 3.076   | 0.568920676 |
| Egln3         | 1.9545   | 3.436   | 0.568830035 |
| Abhd14b       | 5.2535   | 9.2375  | 0.568714479 |
| Actr10        | 30.7935  | 54.1475 | 0.568696616 |
| Trpm7         | 1.8415   | 3.2385  | 0.568627451 |
| D430041D05Rik | 7.2485   | 12.75   | 0.568509804 |
| Fam171b       | 25.21    | 44.346  | 0.568484192 |
| Uck11         | 4.509    | 7.9335  | 0.568349404 |
| Nrxn1         | 42.949   | 75.575  | 0.568296394 |
| Re3h2         | 8.647    | 15.22   | 0.568134034 |
| Tfdp2         | 3.246    | 5.714   | 0.568078404 |
| Lrba          | 3.044    | 5.3595  | 0.567963429 |
| Snx13         | 5.89     | 10.3715 | 0.567902425 |
| R3hdm2        | 51.622   | 90.905  | 0.567867554 |
| Bcl2l2        | 20.917   | 36.887  | 0.567056144 |

|               |         |         |             |
|---------------|---------|---------|-------------|
| Zfp668        | 4.805   | 8.4745  | 0.566995103 |
| Snapc1        | 17.461  | 30.7975 | 0.566961604 |
| LOC100503807  | 10.4265 | 18.392  | 0.566904089 |
| Zkscan16      | 35.352  | 62.381  | 0.566711018 |
| Mkln1         | 6.926   | 12.228  | 0.566404972 |
| Cnn3          | 5.7375  | 10.1315 | 0.566303114 |
| Bcl7a         | 10.764  | 19.01   | 0.566228301 |
| Shroom2       | 5.4695  | 9.66    | 0.566200828 |
| Thsd7a        | 3.299   | 5.827   | 0.566157542 |
| Uhrf1bp11     | 13.9685 | 24.695  | 0.565640818 |
| Ggt7          | 3.496   | 6.181   | 0.565604271 |
| Plcd3         | 1.0785  | 1.907   | 0.565547981 |
| 2810474O19Rik | 3.448   | 6.097   | 0.565524028 |
| Ptpa          | 9.27    | 16.3925 | 0.565502516 |
| Rad50         | 4.306   | 7.615   | 0.565462902 |
| Bcdin3d       | 1.3365  | 2.3655  | 0.564996829 |
| Rnf150        | 5.9745  | 10.5745 | 0.564991253 |
| Mapk14        | 11.596  | 20.528  | 0.564886984 |
| Gsta4         | 49.6915 | 87.9885 | 0.564749939 |
| Bcl2l13       | 3.168   | 5.611   | 0.56460524  |
| Rwdd2b        | 2.5505  | 4.5205  | 0.564207499 |
| Dram2         | 4.465   | 7.914   | 0.564190043 |
| Dlgap1        | 29.2135 | 51.785  | 0.56413054  |
| LOC100169868  | 1.545   | 2.739   | 0.56407448  |
| Srfbp1        | 9.8135  | 17.402  | 0.563929433 |
| Kpnb1         | 24.2665 | 43.0335 | 0.563897894 |
| Trim2         | 32.201  | 57.1045 | 0.563896015 |
| Galnt2        | 4.279   | 7.59    | 0.563768116 |
| Cntnap5b      | 1.6375  | 2.905   | 0.563683305 |
| Fam108b       | 5.4845  | 9.731   | 0.56361114  |
| AK129341      | 4.5535  | 8.082   | 0.563412522 |
| Zfp398        | 4.67    | 8.292   | 0.563193439 |
| Arid2         | 6.207   | 11.026  | 0.562942137 |
| Trak1         | 34.306  | 60.945  | 0.562900976 |
| Zfp74         | 11.328  | 20.1245 | 0.562895973 |
| Rxra          | 7.625   | 13.5485 | 0.562792929 |
| Gngt1         | 2.233   | 3.968   | 0.562752016 |
| Pcyt1a        | 6.437   | 11.4385 | 0.562748612 |
| Camk2g        | 35.8055 | 63.627  | 0.56274066  |
| Ankrd34c      | 3.2155  | 5.7145  | 0.562691399 |
| Rab6b         | 295.447 | 525.069 | 0.562682238 |
| Rnf123        | 4.4295  | 7.873   | 0.562619078 |
| Nfasc         | 21.872  | 38.877  | 0.56259485  |
| Ing5          | 2.8285  | 5.028   | 0.562549722 |
| Ankrd42       | 2.832   | 5.0355  | 0.562406911 |
| 2310047M10Rik | 4.521   | 8.042   | 0.562173589 |
| Megf11        | 3.7275  | 6.632   | 0.562047648 |
| Stx16         | 31.126  | 55.3835 | 0.56200854  |
| Cables1       | 2.7765  | 4.9405  | 0.561987653 |
| Th11          | 10.456  | 18.6065 | 0.561954156 |
| Prkg1         | 2.806   | 4.994   | 0.561874249 |
| Mtmr9         | 4.4795  | 7.978   | 0.561481574 |
| Slc10a4       | 3.8305  | 6.8225  | 0.561451081 |
| Ophn1         | 3.088   | 5.501   | 0.561352481 |
| Nova2         | 11.2175 | 19.9845 | 0.561310015 |



|               |         |          |             |
|---------------|---------|----------|-------------|
| Zfp111        | 1.9755  | 3.52     | 0.561221591 |
| Lrp8          | 7.577   | 13.502   | 0.561176122 |
| Agrn          | 2.4595  | 4.383    | 0.561145334 |
| Pde7b         | 8.041   | 14.332   | 0.561052191 |
| Tcf3          | 2.594   | 4.624    | 0.560986159 |
| Brd8          | 12.401  | 22.114   | 0.560775979 |
| 0610009O20Rik | 6.2255  | 11.104   | 0.560653818 |
| Ubxn4         | 21.7005 | 38.7085  | 0.560613302 |
| Plcx3         | 13.7975 | 24.618   | 0.560463888 |
| Dnm2          | 6.7225  | 11.9965  | 0.560371775 |
| Gcdh          | 3.228   | 5.761    | 0.560319389 |
| Plekhm1       | 5.08    | 9.0665   | 0.560304417 |
| Ncapd3        | 2.0405  | 3.642    | 0.560269083 |
| Ankrd52       | 11.3825 | 20.319   | 0.56018997  |
| Arhgef1       | 3.409   | 6.0855   | 0.560184044 |
| Lrch4         | 4.7775  | 8.5295   | 0.560114895 |
| Stox2         | 22.508  | 40.1875  | 0.56007465  |
| Rev1          | 2.7575  | 4.924    | 0.560012185 |
| Setbp1        | 3.543   | 6.3275   | 0.559936784 |
| Ubap2         | 20.3345 | 36.3245  | 0.559801236 |
| Ergic2        | 4.161   | 7.433    | 0.559800888 |
| Kcnh5         | 2.6825  | 4.792    | 0.559787145 |
| Arnt2         | 31.3405 | 56.0015  | 0.559636795 |
| Stk35         | 6.137   | 10.967   | 0.559587854 |
| Picalm        | 21.0205 | 37.5645  | 0.559584182 |
| Dchs1         | 1.1515  | 2.058    | 0.55952381  |
| Ube2g1        | 4.9385  | 8.827    | 0.559476606 |
| Pbx2          | 11.393  | 20.365   | 0.559440216 |
| Fam193a       | 20.553  | 36.7445  | 0.559349018 |
| Phactr1       | 20.5215 | 36.6905  | 0.559313719 |
| Tlcd2         | 6.3115  | 11.2865  | 0.559207903 |
| Tbc1d24       | 6.927   | 12.3885  | 0.559147597 |
| Gm10465       | 1.4535  | 2.6005   | 0.558930975 |
| 2210408I21Rik | 2.0885  | 3.737    | 0.558870752 |
| Pou6f2        | 5.999   | 10.7355  | 0.558800242 |
| Ppm1g         | 25.753  | 46.088   | 0.558778858 |
| Rbm28         | 10.042  | 17.972   | 0.558758068 |
| BC026590      | 7.0935  | 12.698   | 0.558631281 |
| Aldh5a1       | 50.7165 | 90.8035  | 0.558530233 |
| Cwc27         | 12.845  | 22.9985  | 0.558514686 |
| Msl2          | 5.437   | 9.739    | 0.55827087  |
| Lemd2         | 1.1145  | 1.9965   | 0.558226897 |
| Dusp10        | 5.617   | 10.063   | 0.558183444 |
| Ep400         | 7.4495  | 13.3465  | 0.558161316 |
| Amfr          | 11.2665 | 20.193   | 0.557940871 |
| Dzip1         | 13.8395 | 24.805   | 0.557931869 |
| Zfp11         | 3.6295  | 6.5065   | 0.557826789 |
| Csrnp3        | 16.6785 | 29.9055  | 0.557706776 |
| Ccdc91        | 11.866  | 21.278   | 0.557665194 |
| Anks1         | 2.3105  | 4.146    | 0.557284129 |
| Cdc42se1      | 7.197   | 12.9165  | 0.557194286 |
| Rrbp1         | 6.316   | 11.3395  | 0.556991049 |
| Ddx17         | 70.635  | 126.8195 | 0.556972705 |
| 8430427H17Rik | 11.4265 | 20.526   | 0.556684205 |
| Zfp251        | 4.115   | 7.395    | 0.556457066 |

|              |         |          |             |
|--------------|---------|----------|-------------|
| Ddx50        | 10.556  | 18.9735  | 0.556354916 |
| Myadm        | 15.921  | 28.617   | 0.556347626 |
| Fbxl14       | 4.6765  | 8.4065   | 0.556295724 |
| Zfp277       | 12.356  | 22.2155  | 0.556188247 |
| Cd2ap        | 8.813   | 15.846   | 0.556165594 |
| Tgs1         | 4.3005  | 7.733    | 0.556123109 |
| Sugp1        | 10.8605 | 19.529   | 0.556121665 |
| Kcnn3        | 3.481   | 6.2595   | 0.556114706 |
| Jarid2       | 6.711   | 12.068   | 0.556098774 |
| Xrcc2        | 1.869   | 3.3615   | 0.556001785 |
| Zc3hav11     | 5.351   | 9.625    | 0.555948052 |
| Sall2        | 13.423  | 24.151   | 0.555794791 |
| S100pbp      | 24.321  | 43.7595  | 0.555787886 |
| Pms2         | 3.4445  | 6.1985   | 0.555698959 |
| Gm10622      | 1.515   | 2.7265   | 0.555657436 |
| Ppp1r10      | 9.9945  | 17.9875  | 0.555635858 |
| Clock        | 8.024   | 14.443   | 0.555563249 |
| Prodh        | 1.275   | 2.295    | 0.555555556 |
| Ankfn1       | 6.38    | 11.4845  | 0.555531368 |
| Rab33b       | 13.0975 | 23.5795  | 0.555461312 |
| Fert2        | 2.619   | 4.715    | 0.555461294 |
| LOC100504095 | 12.106  | 21.809   | 0.555091935 |
| Pafah1b2     | 70.037  | 126.1725 | 0.555089263 |
| Rcn2         | 22.4555 | 40.457   | 0.555046098 |
| Zfp362       | 6.6965  | 12.0705  | 0.554782321 |
| Wipf2        | 34.544  | 62.281   | 0.554647485 |
| Stx17        | 5.0435  | 9.0935   | 0.554626931 |
| Zfp12        | 5.8545  | 10.559   | 0.554455914 |
| Park2        | 2.0255  | 3.6535   | 0.554399891 |
| Rel2         | 38.994  | 70.3435  | 0.554336932 |
| Decr2        | 22.3735 | 40.3675  | 0.554245371 |
| Dkc1         | 15.56   | 28.0815  | 0.554101455 |
| Ercc5        | 3.544   | 6.3985   | 0.553879816 |
| Abca2        | 10.3215 | 18.638   | 0.55378796  |
| Gm3662       | 18.0985 | 32.6845  | 0.553733421 |
| Pik3c2b      | 5.02    | 9.0665   | 0.553686649 |
| Tusc1        | 2.12    | 3.829    | 0.553669365 |
| Hrh2         | 1.569   | 2.834    | 0.553634439 |
| D6Wsu116e    | 10.4905 | 18.952   | 0.55352997  |
| Ephb2        | 2.7335  | 4.939    | 0.553452116 |
| Ylpm1        | 19.5295 | 35.292   | 0.553369035 |
| Cdo1         | 24.3545 | 44.016   | 0.55331016  |
| Tmem205      | 3.574   | 6.46     | 0.553250774 |
| Zfp62        | 3.226   | 5.8335   | 0.553012771 |
| Ddx56        | 3.1485  | 5.694    | 0.552950474 |
| Pgm3         | 2.128   | 3.8495   | 0.552799065 |
| Egln1        | 20.3785 | 36.886   | 0.552472483 |
| H2afy2       | 8.4145  | 15.2345  | 0.552331878 |
| Tnks         | 7.269   | 13.1635  | 0.552208759 |
| Kif3a        | 44.7165 | 80.992   | 0.552110085 |
| Narf         | 7.5505  | 13.678   | 0.552017839 |
| Ajap1        | 10.425  | 18.8875  | 0.551952349 |
| Ppp4r2       | 7.796   | 14.1255  | 0.551909667 |
| LOC100504614 | 1.028   | 1.863    | 0.551798175 |
| Vldlr        | 2.4935  | 4.519    | 0.551781368 |

|               |         |          |             |
|---------------|---------|----------|-------------|
| Gm71          | 1.6215  | 2.9405   | 0.55143683  |
| Tom1          | 9.232   | 16.745   | 0.551328755 |
| Chrm3         | 1.5085  | 2.738    | 0.550949598 |
| Prdm2         | 10.129  | 18.3855  | 0.550923282 |
| Pag1          | 1.1145  | 2.023    | 0.550914483 |
| Zfp445        | 4.816   | 8.742    | 0.550903683 |
| Zfp191        | 5.316   | 9.652    | 0.55076668  |
| Ogt           | 8.977   | 16.3025  | 0.550651741 |
| Rgp1          | 2.921   | 5.305    | 0.55061263  |
| Sgtb          | 67.1615 | 122.027  | 0.550382292 |
| Ddx3x         | 38.0775 | 69.1925  | 0.550312534 |
| Smek1         | 4.4435  | 8.075    | 0.550278638 |
| Nrg1          | 9.992   | 18.1585  | 0.550265716 |
| Snx30         | 9.13    | 16.5925  | 0.550248606 |
| Mrpl35        | 12.555  | 22.8225  | 0.550115018 |
| LOC100504464  | 1.279   | 2.325    | 0.550107527 |
| Hspa13        | 5.416   | 9.8475   | 0.549987306 |
| Map3k3        | 1.0375  | 1.8865   | 0.549960244 |
| Acadv1        | 9.8435  | 17.9005  | 0.549900841 |
| Yipf1         | 5.8805  | 10.6955  | 0.549810668 |
| Mphosph9      | 1.937   | 3.524    | 0.549659478 |
| Ptplb         | 5.877   | 10.694   | 0.549560501 |
| Nhlrc2        | 1.201   | 2.1855   | 0.549531    |
| Spry2         | 6.02    | 10.955   | 0.549520767 |
| Plbd2         | 9.49    | 17.2715  | 0.549460093 |
| Prpf4         | 4.215   | 7.674    | 0.549257232 |
| Gm10294       | 10.7635 | 19.5985  | 0.549200194 |
| Larp6         | 5.533   | 10.076   | 0.549126638 |
| Sema7a        | 2.952   | 5.376    | 0.549107143 |
| Pde4dip       | 16.7375 | 30.4885  | 0.548977483 |
| Eri1          | 2.4325  | 4.431    | 0.548973144 |
| Pold2         | 7.1795  | 13.08    | 0.548891437 |
| Btbd12        | 4.327   | 7.8855   | 0.548728679 |
| BC005537      | 17.78   | 32.4085  | 0.548621504 |
| Plcl2         | 4.7815  | 8.7165   | 0.548557334 |
| Zfp369        | 7.9685  | 14.5265  | 0.548549203 |
| Ralgapa2      | 2.7375  | 4.9905   | 0.54854223  |
| Mat2a         | 39.8205 | 72.6115  | 0.548404867 |
| Dgkg          | 16.1395 | 29.4365  | 0.548281895 |
| 9430025M13Rik | 1.7985  | 3.2805   | 0.548239598 |
| Soat2         | 1.8795  | 3.4285   | 0.548198921 |
| Nynrin        | 8.663   | 15.8075  | 0.548030998 |
| Ralgps2       | 5.93    | 10.821   | 0.548008502 |
| Rbm34         | 10.23   | 18.6685  | 0.547981895 |
| Rnf165        | 7.091   | 12.9435  | 0.547842546 |
| Luc7l         | 11.5845 | 21.146   | 0.547834106 |
| Dep1a         | 5.423   | 9.899    | 0.547833114 |
| Zfp609        | 11.3955 | 20.803   | 0.54778157  |
| Sirt6         | 3.159   | 5.7675   | 0.547724317 |
| Zranb2        | 28.702  | 52.4045  | 0.547701056 |
| Ank1          | 5.957   | 10.877   | 0.547669394 |
| Prkca         | 7.5535  | 13.7925  | 0.54765271  |
| Zdhhc20       | 8.42    | 15.386   | 0.547250747 |
| Sec24b        | 16.9695 | 31.0135  | 0.547164944 |
| Rpsa          | 87.284  | 159.5445 | 0.547082475 |

|              |         |         |             |
|--------------|---------|---------|-------------|
| Fam101b      | 2.3045  | 4.213   | 0.546997389 |
| Haus3        | 1.01    | 1.8465  | 0.546980774 |
| Epb4.1       | 3.9885  | 7.294   | 0.546819304 |
| Sertad2      | 2.5835  | 4.725   | 0.546772487 |
| Rdh1         | 5.0265  | 9.1935  | 0.546744983 |
| Ppp3cc       | 6.4965  | 11.8845 | 0.546636375 |
| Atp1b3       | 30.507  | 55.83   | 0.546426652 |
| Pcdh1        | 18.22   | 33.344  | 0.546425144 |
| Pphln1       | 24.2265 | 44.358  | 0.546158528 |
| Pex5l        | 24.1085 | 44.1475 | 0.546089813 |
| Osbp2        | 5.0935  | 9.3275  | 0.546073439 |
| Irs1         | 2.9485  | 5.4     | 0.546018519 |
| Slitrk3      | 12.5475 | 22.9905 | 0.545768905 |
| Lysmd3       | 1.083   | 1.9845  | 0.545729403 |
| Ybx1         | 30.9255 | 56.6815 | 0.545601298 |
| Csf2rb2      | 1.386   | 2.541   | 0.545454545 |
| Sh3bgrl2     | 3.0585  | 5.6095  | 0.545235761 |
| Nbeal1       | 1.4495  | 2.6585  | 0.545232274 |
| Eif4ebp2     | 18.682  | 34.266  | 0.54520516  |
| Pogz         | 17.589  | 32.271  | 0.545040439 |
| Ppp1r3f      | 5.0465  | 9.259   | 0.545037261 |
| Rnft2        | 5.3575  | 9.8315  | 0.544932106 |
| Rgs12        | 1.268   | 2.327   | 0.544907606 |
| Cpt1a        | 1.0495  | 1.927   | 0.544628957 |
| Kif3b        | 8.313   | 15.267  | 0.544507762 |
| Csnk1g1      | 5.5795  | 10.2505 | 0.544314911 |
| Cpeb4        | 38.465  | 70.6695 | 0.544294215 |
| Sgsm2        | 5.976   | 10.9795 | 0.54428708  |
| Dlg2         | 54.865  | 100.822 | 0.544176866 |
| Taf7         | 4.815   | 8.85    | 0.544067797 |
| St8sia4      | 1.623   | 2.9835  | 0.543991956 |
| Mipol1       | 2.695   | 4.9555  | 0.543840178 |
| Polr3h       | 3.293   | 6.0555  | 0.543803154 |
| Ccnd3        | 2.4265  | 4.463   | 0.543692583 |
| Mbnl1        | 37.348  | 68.697  | 0.543662751 |
| Ampd2        | 11.7775 | 21.6655 | 0.543606194 |
| Usp54        | 10.0355 | 18.461  | 0.543605438 |
| Rspo1        | 11.58   | 21.306  | 0.543508871 |
| MacroD2      | 7.427   | 13.6655 | 0.543485419 |
| Prdx6        | 19.323  | 35.554  | 0.543483152 |
| Myo1b        | 1.0945  | 2.014   | 0.543445879 |
| Zfp738       | 2.5265  | 4.65    | 0.543333333 |
| Fmn2         | 7.847   | 14.4445 | 0.543251757 |
| Kctd4        | 4.98    | 9.17    | 0.543075245 |
| Mrap2        | 16.6455 | 30.669  | 0.542746748 |
| Pwp2         | 2.1665  | 3.9935  | 0.542506573 |
| Zfp143       | 1.105   | 2.037   | 0.542464408 |
| Dync1li2     | 46.081  | 84.96   | 0.542384652 |
| Psme3        | 36.402  | 67.144  | 0.542148219 |
| LOC100502725 | 10.8505 | 20.0155 | 0.542104869 |
| Psme1        | 160.601 | 296.275 | 0.542067336 |
| Zfp322a      | 4.5915  | 8.4715  | 0.541993744 |
| Zfp566       | 1.797   | 3.3165  | 0.541836273 |
| Apbb2        | 24.838  | 45.8435 | 0.541799819 |
| Ppm1e        | 12.5635 | 23.1885 | 0.541798736 |

|               |          |          |             |
|---------------|----------|----------|-------------|
| LOC100502943  | 9.7525   | 18.001   | 0.541775457 |
| E330016A19Rik | 1.067    | 1.9695   | 0.541761868 |
| Agap1         | 26.5665  | 49.0425  | 0.541703624 |
| Camk4         | 7.041    | 12.999   | 0.541657051 |
| Nat9          | 4.7705   | 8.8085   | 0.541579156 |
| Slc35e3       | 6.8545   | 12.6575  | 0.541536638 |
| Wdr60         | 2.9695   | 5.4835   | 0.541533692 |
| Mafg          | 9.3035   | 17.183   | 0.541436303 |
| C030046E11Rik | 2.623    | 4.845    | 0.541382869 |
| Stau2         | 32.298   | 59.6645  | 0.54132692  |
| Psmc9         | 4.227    | 7.809    | 0.541298502 |
| Ddx10         | 5.1905   | 9.589    | 0.54129732  |
| Dcaf8         | 19.5425  | 36.104   | 0.541283514 |
| Ctnd2         | 66.5645  | 122.9765 | 0.541278212 |
| Smarcd1       | 2.035    | 3.76     | 0.541223404 |
| D4Ert22e      | 4.3475   | 8.033    | 0.541205029 |
| Itch          | 8.4635   | 15.639   | 0.541179104 |
| Ccdc21        | 1.565    | 2.892    | 0.541147994 |
| Dusp28        | 7.378    | 13.6415  | 0.540849613 |
| Rcctb1        | 12.631   | 23.362   | 0.540664327 |
| Kcnh7         | 3.5645   | 6.5935   | 0.540608175 |
| Tpp1          | 8.9375   | 16.5455  | 0.540177087 |
| Sat1          | 6.7835   | 12.558   | 0.540173595 |
| Lrrc57        | 4.605    | 8.5255   | 0.540144273 |
| Zbtb9         | 1.7955   | 3.3245   | 0.540081215 |
| Mier3         | 3.5475   | 6.5685   | 0.540077643 |
| Nsun5         | 3.007    | 5.569    | 0.539953313 |
| Rpl10         | 514.8905 | 953.7275 | 0.539871714 |
| Ssx2ip        | 19.879   | 36.8255  | 0.53981616  |
| Dab1          | 17.958   | 33.2785  | 0.539627688 |
| Fam102b       | 4.7255   | 8.764    | 0.539194432 |
| Bpgm          | 23.0905  | 42.8395  | 0.539000222 |
| 2010109I03Rik | 1.0305   | 1.912    | 0.538964435 |
| Kdm2a         | 15.248   | 28.2925  | 0.538941416 |
| Tmed7         | 8.2665   | 15.3395  | 0.538902833 |
| Ivd           | 11.7175  | 21.7435  | 0.538896682 |
| Rab23         | 10.8115  | 20.065   | 0.538823823 |
| Cnpy4         | 1.781    | 3.3055   | 0.538798971 |
| Crtac1        | 3.122    | 5.796    | 0.538647343 |
| Slc35d1       | 1.6465   | 3.057    | 0.538599935 |
| Il17d         | 1.979    | 3.6745   | 0.538576677 |
| Cblb          | 6.659    | 12.3645  | 0.538557968 |
| Dhx40         | 4.3815   | 8.143    | 0.538069508 |
| Srcap         | 22.265   | 41.383   | 0.53802286  |
| Tlk2          | 13.1975  | 24.5345  | 0.537915996 |
| Rab27b        | 4.9      | 9.118    | 0.537398552 |
| Tgm2          | 1.0245   | 1.9065   | 0.537372148 |
| Tmem38b       | 1.0475   | 1.95     | 0.537179487 |
| Bivm          | 3.5365   | 6.5835   | 0.537176274 |
| Derl2         | 3.433    | 6.3935   | 0.536951591 |
| Hnrnpa1       | 102.798  | 191.477  | 0.536868658 |
| 9030425E11Rik | 5.234    | 9.7495   | 0.536848043 |
| Anxa5         | 11.604   | 21.618   | 0.53677491  |
| Hdac1         | 14.72    | 27.43    | 0.536638717 |
| Rffl          | 1.8425   | 3.4335   | 0.536624436 |

|          |         |         |             |
|----------|---------|---------|-------------|
| Ncald    | 38.4335 | 71.622  | 0.536615844 |
| Arvcf    | 4.5115  | 8.4105  | 0.536412817 |
| Klhl24   | 5.591   | 10.423  | 0.536409863 |
| Tyw1     | 1.05    | 1.9575  | 0.536398467 |
| Lcmt2    | 3.495   | 6.517   | 0.536289704 |
| Gcap14   | 18.261  | 34.0565 | 0.536197202 |
| Bicd1    | 7.9565  | 14.839  | 0.536188422 |
| Rbpj     | 8.045   | 15.006  | 0.536118886 |
| Ankrd40  | 16.202  | 30.2305 | 0.535948793 |
| Gm672    | 51.775  | 96.6395 | 0.535754014 |
| Galc     | 1.4295  | 2.6685  | 0.53569421  |
| Bra2     | 1.017   | 1.8985  | 0.535686068 |
| Fam134b  | 18.5765 | 34.6895 | 0.535507863 |
| Gm6887   | 1.218   | 2.275   | 0.535384615 |
| Nup210   | 1.304   | 2.436   | 0.535303777 |
| Iqcc     | 2.377   | 4.4445  | 0.534818315 |
| Xkr4     | 2.78    | 5.1995  | 0.534666795 |
| Phlpp1   | 9.0775  | 16.98   | 0.534599529 |
| Zfp3612  | 2.261   | 4.2295  | 0.534578555 |
| Ppp1r15a | 1.6495  | 3.0875  | 0.534251012 |
| Ube4a    | 4.348   | 8.1405  | 0.534119526 |
| Zfp516   | 3.2175  | 6.0245  | 0.534069217 |
| Ivns1abp | 9.7325  | 18.2305 | 0.533858095 |
| Gefc1    | 7.4735  | 14.0005 | 0.533802364 |
| AI646023 | 13.458  | 25.2215 | 0.533592372 |
| Ccdc22   | 1.874   | 3.5135  | 0.533371282 |
| Siah1b   | 1.1475  | 2.1515  | 0.533348826 |
| Ero11b   | 1.946   | 3.6505  | 0.533077661 |
| Ccdc93   | 1.8975  | 3.56    | 0.533005618 |
| Wee1     | 5.379   | 10.0955 | 0.532811649 |
| Gm4979   | 4.341   | 8.1495  | 0.532670716 |
| B9d1     | 4.033   | 7.572   | 0.53262018  |
| Commd5   | 4.1415  | 7.776   | 0.532600309 |
| Fut9     | 4.1775  | 7.846   | 0.532436911 |
| Mfsd11   | 3.329   | 6.2555  | 0.532171689 |
| Sbf2     | 4.9815  | 9.361   | 0.532154684 |
| Nck1     | 3.331   | 6.26    | 0.532108626 |
| Sox1     | 10.6465 | 20.0115 | 0.532019089 |
| Zfp120   | 1.933   | 3.635   | 0.531774415 |
| Pcdh9    | 11.2195 | 21.1005 | 0.531717258 |
| Fzd3     | 6.3275  | 11.9005 | 0.531700349 |
| Krba1    | 1.9895  | 3.7425  | 0.531596526 |
| Add3     | 15.0355 | 28.286  | 0.531552712 |
| Hook1    | 2.988   | 5.6225  | 0.531436194 |
| Cnot6    | 2.4575  | 4.6245  | 0.531408801 |
| Mettl3   | 3.178   | 5.9805  | 0.531393696 |
| Gm10876  | 1.984   | 3.7345  | 0.531262552 |
| Dip2b    | 20.877  | 39.338  | 0.530708221 |
| Mblac2   | 11.7955 | 22.227  | 0.530683403 |
| Ing3     | 4.633   | 8.7325  | 0.530546808 |
| Zfp747   | 3.6935  | 6.962   | 0.530522838 |
| Ipo8     | 6.4485  | 12.156  | 0.530478776 |
| Zfp84    | 3.284   | 6.1945  | 0.530147712 |
| Zfp91    | 9.3955  | 17.725  | 0.530070522 |
| Chka     | 10.575  | 19.9545 | 0.529955649 |

|               |         |          |             |
|---------------|---------|----------|-------------|
| Tbce          | 6.0635  | 11.4425  | 0.529910422 |
| Cd9912        | 43.5375 | 82.176   | 0.529807973 |
| C77080        | 1.321   | 2.4945   | 0.529565043 |
| Phf13         | 5.446   | 10.284   | 0.529560482 |
| Zmym4         | 14.131  | 26.698   | 0.529290584 |
| Mag           | 9.049   | 17.0965  | 0.529289621 |
| Ddhd2         | 8.8695  | 16.7645  | 0.529064392 |
| Fbxl21        | 8.3615  | 15.81    | 0.52887413  |
| Mfsd4         | 5.6925  | 10.7635  | 0.52887072  |
| Stat2         | 6.0795  | 11.4985  | 0.528721138 |
| Rnf152        | 3.3485  | 6.334    | 0.528654878 |
| Insr          | 3.5525  | 6.7205   | 0.528606502 |
| Zcchc6        | 5.6465  | 10.682   | 0.528599513 |
| Usp37         | 2.1545  | 4.0765   | 0.52851711  |
| Zhx3          | 16.9515 | 32.0745  | 0.528503952 |
| Gm10118       | 1.7945  | 3.3955   | 0.528493594 |
| Zbtb8a        | 1.3615  | 2.577    | 0.528327513 |
| Colec12       | 10.808  | 20.459   | 0.528276064 |
| Sod2          | 61.6525 | 116.7285 | 0.52817007  |
| B230209E15Rik | 36.6105 | 69.3485  | 0.527920575 |
| Zbtb8b        | 1.4525  | 2.7515   | 0.527893876 |
| Zc3h7b        | 8.417   | 15.947   | 0.527810874 |
| Zfp827        | 8.4265  | 15.968   | 0.527711673 |
| Eef1g         | 169.982 | 322.114  | 0.527707582 |
| Mmaa          | 3.8845  | 7.3645   | 0.527462828 |
| Klf15         | 2.897   | 5.493    | 0.527398507 |
| Csk           | 5.5515  | 10.5275  | 0.527333175 |
| Csf2ra        | 6.633   | 12.5805  | 0.527244545 |
| Dnajb2        | 18.4935 | 35.086   | 0.527090577 |
| Zyg11b        | 25.0105 | 47.4635  | 0.526941755 |
| Thoc1         | 2.7555  | 5.2295   | 0.526914619 |
| ORF19         | 4.553   | 8.643    | 0.526784681 |
| Hipk1         | 21.6775 | 41.151   | 0.526779422 |
| Acad9         | 4.1615  | 7.9      | 0.526772152 |
| Exoc5         | 3.4145  | 6.483    | 0.526685177 |
| Gnptg         | 21.6425 | 41.092   | 0.526684026 |
| Mthfd21       | 2.9705  | 5.6415   | 0.526544359 |
| Orc4l         | 5.0835  | 9.6545   | 0.526542027 |
| Tmtc1         | 11.4175 | 21.684   | 0.526540306 |
| B4galt6       | 20.044  | 38.071   | 0.526489979 |
| Ankrd44       | 1.7365  | 3.2995   | 0.526291862 |
| Utp15         | 5.057   | 9.6105   | 0.526195307 |
| Gm1060        | 2.374   | 4.513    | 0.526035896 |
| Zfp46         | 4.518   | 8.5925   | 0.52580739  |
| Ccdc50        | 8.1305  | 15.4645  | 0.52575253  |
| Zfhx2         | 10.0415 | 19.1005  | 0.525719222 |
| Smpd13a       | 1.4555  | 2.769    | 0.525641026 |
| Rab39b        | 16.223  | 30.8795  | 0.525364724 |
| Nudt16        | 12.522  | 23.835   | 0.525361863 |
| Lsg1          | 8.722   | 16.6045  | 0.525279292 |
| Stx12         | 44.8535 | 85.3955  | 0.525244304 |
| Zfp667        | 4.238   | 8.071    | 0.525089828 |
| Mtpn          | 29.791  | 56.754   | 0.524914543 |
| Spag6         | 1.8725  | 3.5685   | 0.524730279 |
| LOC100502877  | 6.498   | 12.394   | 0.524285945 |

|               |         |         |             |
|---------------|---------|---------|-------------|
| Cyp2j6        | 1.0795  | 2.059   | 0.524283633 |
| 5730507C01Rik | 1.9725  | 3.763   | 0.524182833 |
| Tll1          | 2.5065  | 4.782   | 0.524153074 |
| Gtpbp1        | 7.2065  | 13.753  | 0.523994765 |
| Morc3         | 2.2075  | 4.213   | 0.523973416 |
| D5Erttd579e   | 14.2705 | 27.24   | 0.523880323 |
| Gm14137       | 1.2955  | 2.473   | 0.523857663 |
| Ppp1r16a      | 2.7225  | 5.1975  | 0.523809524 |
| Btbd9         | 4.5805  | 8.745   | 0.52378502  |
| 1200014J11Rik | 5.257   | 10.038  | 0.523709902 |
| Wdr83         | 3.4875  | 6.6595  | 0.523687965 |
| Sema6a        | 12.713  | 24.2795 | 0.523610453 |
| Eif5a2        | 8.711   | 16.6405 | 0.523481867 |
| 1110007A13Rik | 6.6615  | 12.726  | 0.523455917 |
| Usp36         | 4.8505  | 9.267   | 0.523416424 |
| Gm52          | 1.504   | 2.8735  | 0.523403515 |
| Capn1         | 1.0755  | 2.055   | 0.523357664 |
| Cep170        | 14.9395 | 28.554  | 0.523201653 |
| Fdx1          | 7.146   | 13.6595 | 0.523152385 |
| Hoxb1         | 1.034   | 1.9775  | 0.522882427 |
| Ube2l6        | 6.606   | 12.635  | 0.522833399 |
| Ankrd17       | 24.064  | 46.0265 | 0.52282924  |
| Cstf2         | 9.956   | 19.0615 | 0.522309367 |
| Gpr137b       | 2.7105  | 5.1905  | 0.522204027 |
| D10Bwg1379e   | 17.3685 | 33.26   | 0.522203848 |
| Eif2c2        | 24.811  | 47.517  | 0.522149967 |
| Capn5         | 12.1935 | 23.353  | 0.522138483 |
| Dcun1d3       | 2.6485  | 5.0725  | 0.522129128 |
| Kbtbd10       | 1.679   | 3.216   | 0.522077114 |
| Rapgef1       | 10.186  | 19.5135 | 0.521997591 |
| Ranbp10       | 3.7345  | 7.155   | 0.521942697 |
| Cc2d2a        | 4.5595  | 8.736   | 0.521920788 |
| Ppm1b         | 32.909  | 63.0615 | 0.521855649 |
| Phc3          | 12.616  | 24.1755 | 0.521850634 |
| Pde12         | 2.4925  | 4.777   | 0.521770986 |
| Prpf31        | 5.171   | 9.9105  | 0.52176984  |
| Sdc2          | 15.637  | 29.972  | 0.521720272 |
| Mtap4         | 29.6895 | 56.919  | 0.521609656 |
| Azi2          | 8.27    | 15.8575 | 0.521519786 |
| Plekhm2       | 2.3865  | 4.5765  | 0.521468371 |
| Spire1        | 27.049  | 51.878  | 0.521396353 |
| Dzip11        | 2.0445  | 3.9215  | 0.521356624 |
| Stim1         | 5.324   | 10.212  | 0.521347434 |
| BC017158      | 9.2855  | 17.816  | 0.521188819 |
| Sfxn4         | 3.3025  | 6.3365  | 0.521186775 |
| Rnf138        | 1.5715  | 3.016   | 0.521054377 |
| Mreg          | 4.26    | 8.1765  | 0.52100532  |
| Zkscan1       | 11.2695 | 21.635  | 0.520892073 |
| Ttc21b        | 1.8635  | 3.578   | 0.520821688 |
| Nek9          | 5.017   | 9.6335  | 0.520786838 |
| Snx25         | 6.545   | 12.568  | 0.520767027 |
| Tmem111       | 11.453  | 21.994  | 0.520732927 |
| Gnl2          | 13.5315 | 25.987  | 0.520702659 |
| Arrb1         | 17.41   | 33.45   | 0.520478326 |
| Lhx1          | 1.265   | 2.431   | 0.520361991 |



|               |         |          |             |
|---------------|---------|----------|-------------|
| Car10         | 35.643  | 68.5345  | 0.520073831 |
| Tbc1d1        | 3.1235  | 6.006    | 0.52006327  |
| Nfe2l1        | 44.0765 | 84.7545  | 0.520049083 |
| Nxn           | 1.2805  | 2.4625   | 0.52        |
| Ccdc48        | 2.313   | 4.4485   | 0.519950545 |
| C330007P06Rik | 5.666   | 10.8995  | 0.51984036  |
| Gpd1l         | 14.642  | 28.1825  | 0.519542269 |
| Fem1b         | 25.512  | 49.106   | 0.519529182 |
| Ebpl          | 2.0035  | 3.8565   | 0.519512511 |
| Rrp1b         | 2.797   | 5.3845   | 0.519453988 |
| Ppapdc3       | 2.5165  | 4.845    | 0.519401445 |
| Pacs2         | 26.354  | 50.749   | 0.519300873 |
| Malt1         | 1.5585  | 3.002    | 0.519153897 |
| Nxph1         | 10.776  | 20.76    | 0.519075145 |
| Golga3        | 12.4    | 23.893   | 0.518980455 |
| Mxd4          | 3.5555  | 6.851    | 0.518975332 |
| Abcb7         | 2.8825  | 5.5575   | 0.518668466 |
| Tmem2         | 1.609   | 3.1025   | 0.518614021 |
| Olfir6l3      | 4.1995  | 8.0985   | 0.518552818 |
| Nsun3         | 17.272  | 33.313   | 0.518476271 |
| Lrrc6         | 2.8835  | 5.563    | 0.518335431 |
| Nat8l         | 14.6125 | 28.203   | 0.51811864  |
| Anapc16       | 17.647  | 34.072   | 0.517932613 |
| Thtpa         | 4.877   | 9.4175   | 0.517865676 |
| Hnrnpa3       | 36.861  | 71.207   | 0.517659781 |
| Ankrd27       | 2.777   | 5.365    | 0.517614166 |
| 9430031J16Rik | 4.958   | 9.5815   | 0.517455513 |
| Zfp563        | 1.6175  | 3.126    | 0.517434421 |
| Tnfrsf10b     | 2.4415  | 4.7185   | 0.517431387 |
| Gpd2          | 8.0895  | 15.6355  | 0.51738032  |
| Ric3          | 8.8395  | 17.086   | 0.517353389 |
| Grk5          | 3.118   | 6.0285   | 0.51720992  |
| Rgag1         | 1.87    | 3.616    | 0.517146018 |
| Ssr3          | 24.0195 | 46.4545  | 0.517054322 |
| 0610007P08Rik | 1.7385  | 3.364    | 0.516795482 |
| Rdh9          | 2.2675  | 4.388    | 0.516750228 |
| Zcchc11       | 5.3905  | 10.432   | 0.516727377 |
| Dusp18        | 4.179   | 8.0885   | 0.516659455 |
| Tead1         | 4.95    | 9.5815   | 0.516620571 |
| Snrk          | 17.9365 | 34.722   | 0.516574506 |
| Rnf169        | 9.9355  | 19.2345  | 0.51654579  |
| Exoc8         | 3.316   | 6.423    | 0.516269656 |
| AI848100      | 4.3565  | 8.441    | 0.516111835 |
| Tinf2         | 1.242   | 2.4065   | 0.516102223 |
| Plxdc2        | 9.679   | 18.755   | 0.516075713 |
| N28178        | 16.164  | 31.3215  | 0.516067238 |
| Rnf11         | 19.59   | 37.967   | 0.515974399 |
| Atp11b        | 2.307   | 4.4715   | 0.51593425  |
| LOC100503879  | 5.11    | 9.91     | 0.515640767 |
| Xpnpep3       | 3.7595  | 7.2935   | 0.51545897  |
| Nufip2        | 12.126  | 23.526   | 0.515429737 |
| Camk2a        | 97.3095 | 188.8425 | 0.515294491 |
| Ncoa6         | 16.8295 | 32.66    | 0.515293938 |
| Camk1d        | 14.5875 | 28.3095  | 0.515286388 |
| Shisa7        | 8.538   | 16.5705  | 0.51525301  |

|               |         |          |             |
|---------------|---------|----------|-------------|
| BC032203      | 14.845  | 28.8115  | 0.515245648 |
| Fktn          | 11.6585 | 22.6275  | 0.515235886 |
| Ccdc75        | 5.2645  | 10.219   | 0.515167825 |
| Gstz1         | 9.473   | 18.3895  | 0.515130917 |
| Mcart1        | 25.5155 | 49.5355  | 0.515095235 |
| Ddx21         | 2.1425  | 4.1595   | 0.515085948 |
| Gpkow         | 11.374  | 22.086   | 0.51498687  |
| Zfp507        | 3.576   | 6.944    | 0.514976959 |
| I118r1        | 1.411   | 2.741    | 0.514775629 |
| Abca6         | 1.199   | 2.33     | 0.514592275 |
| Sgpp1         | 12.58   | 24.4745  | 0.514004372 |
| Nrp1          | 2.6465  | 5.149    | 0.513983298 |
| Caeng5        | 4.174   | 8.121    | 0.513976111 |
| Gm14322       | 9.9915  | 19.44    | 0.513966049 |
| Klra2         | 1.8015  | 3.5055   | 0.513906718 |
| Supt71        | 15.722  | 30.602   | 0.513757271 |
| Surf6         | 3.5795  | 6.9685   | 0.513668652 |
| Cbfa2t2       | 7.431   | 14.468   | 0.513616257 |
| Crbn          | 6.75    | 13.1435  | 0.513561837 |
| Brip1         | 1.697   | 3.3055   | 0.51338678  |
| Ube3a         | 11.1495 | 21.723   | 0.513257837 |
| Cspp1         | 2.053   | 4.0005   | 0.513185852 |
| Ttl           | 5.399   | 10.5225  | 0.513090995 |
| Cadm2         | 8.395   | 16.362   | 0.513079086 |
| Tmem214       | 7.393   | 14.41    | 0.513046495 |
| Exog          | 2.657   | 5.1805   | 0.512884857 |
| Phlpp2        | 4.983   | 9.7165   | 0.512838985 |
| Ggps1         | 20.6965 | 40.358   | 0.512822737 |
| Hdac9         | 7.435   | 14.5015  | 0.512705582 |
| Slc6a7        | 11.042  | 21.538   | 0.512675272 |
| Mapk7         | 2.0625  | 4.024    | 0.512549702 |
| Tom112        | 63.4735 | 123.8845 | 0.512360303 |
| Tmcc2         | 12.1105 | 23.6395  | 0.51229933  |
| Tnrc6c        | 18.617  | 36.3565  | 0.512067993 |
| Mef2a         | 11.727  | 22.9115  | 0.511839033 |
| Txlna         | 3.412   | 6.6665   | 0.511812795 |
| Ms4a6c        | 1.4205  | 2.7755   | 0.511799676 |
| Meis2         | 14.227  | 27.803   | 0.51170737  |
| Cdk7          | 9.6865  | 18.93    | 0.511701004 |
| Nrarp         | 4.026   | 7.8685   | 0.511660418 |
| Zswim6        | 5.8125  | 11.3615  | 0.51159618  |
| 1810013L24Rik | 21.2145 | 41.4705  | 0.511556408 |
| Bend4         | 5.091   | 9.9555   | 0.511375622 |
| Trhr          | 2.2855  | 4.4705   | 0.511240353 |
| Ccdc85a       | 8.611   | 16.8465  | 0.511144748 |
| Tceb3         | 7.637   | 14.941   | 0.511143832 |
| Nt5c3l        | 6.3675  | 12.4595  | 0.511055821 |
| 4933426M11Rik | 2.4725  | 4.8385   | 0.511005477 |
| Gbp2          | 2.6815  | 5.2475   | 0.511005241 |
| Taf13         | 10.239  | 20.0405  | 0.510915396 |
| Cybasc3       | 1.559   | 3.052    | 0.510812582 |
| A630055G03Rik | 4.4545  | 8.7215   | 0.510749298 |
| Zc3h12b       | 5.624   | 11.0125  | 0.510692395 |
| Sae1          | 22.7665 | 44.5895  | 0.510579845 |
| Alkbh3        | 3.605   | 7.062    | 0.510478618 |

|               |         |          |             |
|---------------|---------|----------|-------------|
| Crtc1         | 14.7975 | 29       | 0.510258621 |
| Slc7a6        | 1.1695  | 2.292    | 0.510253054 |
| Mad211bp      | 1.378   | 2.701    | 0.510181414 |
| Rnpep         | 3.151   | 6.1775   | 0.510076892 |
| Scamp1        | 68.3685 | 134.0815 | 0.509902559 |
| Slc24a2       | 11.7595 | 23.0635  | 0.509874911 |
| Zfp53         | 2.158   | 4.2325   | 0.509864146 |
| Sufu          | 1.725   | 3.3835   | 0.509827102 |
| Hpcal4        | 81.6945 | 160.244  | 0.50981316  |
| BC046331      | 5.4215  | 10.636   | 0.509731102 |
| Cdh11         | 15.465  | 30.3435  | 0.509664343 |
| Creg2         | 12.631  | 24.7845  | 0.509633037 |
| Als2          | 5.326   | 10.454   | 0.509470059 |
| Tsc22d2       | 5.3565  | 10.514   | 0.509463572 |
| Pgbd5         | 20.6125 | 40.468   | 0.509353069 |
| Phf3          | 11.739  | 23.0505  | 0.509273118 |
| Gm6636        | 1.1785  | 2.315    | 0.509071274 |
| Paip1         | 4.3075  | 8.4615   | 0.509070496 |
| Dcp2          | 10.6155 | 20.8545  | 0.509026829 |
| Nsa2          | 15.3135 | 30.084   | 0.509024731 |
| Myt11         | 32.4375 | 63.758   | 0.508759685 |
| Fam46a        | 4.9595  | 9.751    | 0.508614501 |
| Ccdc39        | 1.99    | 3.914    | 0.508431272 |
| Celf2         | 22.383  | 44.0335  | 0.508317531 |
| Acsf3         | 2.487   | 4.893    | 0.508277131 |
| Phf2011       | 1.6085  | 3.165    | 0.50821485  |
| Ildr2         | 11.426  | 22.483   | 0.5082062   |
| Adpgk         | 1.956   | 3.849    | 0.508183944 |
| Rasgef1a      | 16.238  | 31.957   | 0.508120287 |
| Sh2d4a        | 1.6465  | 3.241    | 0.508022215 |
| Rock2         | 18.354  | 36.134   | 0.507942658 |
| Braf          | 15.744  | 30.9985  | 0.507895543 |
| Luc7l2        | 26.5215 | 52.262   | 0.507471968 |
| Sgce          | 9.4615  | 18.645   | 0.507455082 |
| Kremen2       | 2.829   | 5.575    | 0.507443946 |
| Sec14l1       | 7.8665  | 15.503   | 0.507417919 |
| R3hdm1        | 37.2645 | 73.4585  | 0.507286427 |
| Mtr           | 3.754   | 7.4005   | 0.507263023 |
| Smg1          | 5.519   | 10.8835  | 0.5070979   |
| Hivep3        | 5.1615  | 10.1835  | 0.506849315 |
| Chgb          | 76.0565 | 150.0575 | 0.506849041 |
| Arid5b        | 13.5475 | 26.729   | 0.506846496 |
| Tmem43        | 3.9265  | 7.747    | 0.506841358 |
| 2810407C02Rik | 22.735  | 44.859   | 0.506810228 |
| Adam10        | 3.875   | 7.6465   | 0.506767802 |
| Efcab1        | 1.692   | 3.339    | 0.506738544 |
| Tsc1          | 6.9665  | 13.7495  | 0.50667297  |
| Mtx3          | 18.2045 | 35.935   | 0.506595241 |
| Setd7         | 25.174  | 49.693   | 0.506590465 |
| Slc30a6       | 1.5285  | 3.018    | 0.506461233 |
| Reps2         | 19.3025 | 38.1185  | 0.506381416 |
| Ift122        | 2.1575  | 4.261    | 0.506336541 |
| Arl5a         | 12.843  | 25.365   | 0.506327617 |
| Tppp          | 71.6595 | 141.6265 | 0.505975224 |
| Gatad2a       | 7.1125  | 14.061   | 0.505831733 |

|               |         |         |             |
|---------------|---------|---------|-------------|
| Ftsj3         | 5.843   | 11.5515 | 0.505821755 |
| Brdt          | 1.1545  | 2.2835  | 0.505583534 |
| Asrgl1        | 22.6205 | 44.7505 | 0.505480386 |
| Tbck          | 4.3705  | 8.649   | 0.505318534 |
| Ttl17         | 19.002  | 37.614  | 0.50518424  |
| Frmd6         | 1.3815  | 2.735   | 0.50511883  |
| Eps8l3        | 3.2995  | 6.533   | 0.505051278 |
| Btg3          | 3.86    | 7.643   | 0.505037289 |
| Gm4841        | 2.083   | 4.1255  | 0.504908496 |
| Pvr           | 1.1285  | 2.236   | 0.504695886 |
| Fgd5          | 1.6305  | 3.232   | 0.504486386 |
| LOC100503802  | 4.7935  | 9.502   | 0.504472743 |
| E130308A19Rik | 5.372   | 10.649  | 0.504460513 |
| Pigq          | 11.3065 | 22.414  | 0.50443919  |
| Tnrc6a        | 12.6045 | 24.992  | 0.504341389 |
| Rc3h1         | 9.0055  | 17.865  | 0.504086202 |
| Golga7        | 19.852  | 39.3965 | 0.503902631 |
| Vps26a        | 21.912  | 43.4955 | 0.503776253 |
| Tmem177       | 1.6105  | 3.1975  | 0.503674746 |
| Gm9265        | 1.9585  | 3.8885  | 0.503664652 |
| Csrp2bp       | 7.1365  | 14.17   | 0.503634439 |
| Slc4a2        | 1.334   | 2.649   | 0.503586259 |
| Cbx5          | 26.4015 | 52.4425 | 0.503437098 |
| Entpd7        | 1.611   | 3.2005  | 0.50335885  |
| Rbl2          | 9.71    | 19.291  | 0.503343528 |
| Gclm          | 10.521  | 20.903  | 0.503324882 |
| Ccar1         | 13.6405 | 27.121  | 0.502949744 |
| Pan3          | 6.391   | 12.708  | 0.502911552 |
| D5Erttd579e   | 4.8145  | 9.576   | 0.502767335 |
| Ddx6          | 32.7865 | 65.2245 | 0.502671542 |
| Ispd          | 1.5095  | 3.003   | 0.502664003 |
| Myo9b         | 2.415   | 4.805   | 0.502601457 |
| Crebbp        | 24.3305 | 48.411  | 0.502582058 |
| Dhdh          | 15.664  | 31.1695 | 0.50254255  |
| Ppm1h         | 10.2065 | 20.31   | 0.502535697 |
| Smg7          | 20.353  | 40.502  | 0.502518394 |
| Fam13b        | 18.16   | 36.142  | 0.502462509 |
| Arhgap23      | 19.3055 | 38.428  | 0.502381076 |
| Enoph1        | 11.8385 | 23.5675 | 0.502323114 |
| Prop1         | 1.275   | 2.5385  | 0.502265117 |
| Cdc37l1       | 17.625  | 35.104  | 0.502079535 |
| Btg2          | 1.2165  | 2.423   | 0.502063558 |
| Cd63          | 14.0715 | 28.0275 | 0.502060476 |
| Cdc42bpa      | 36.0075 | 71.747  | 0.501867674 |
| Dpy19l3       | 2.385   | 4.7525  | 0.501841136 |
| Tmem69        | 16.241  | 32.377  | 0.501621521 |
| Ddx27         | 3.1805  | 6.341   | 0.501577038 |
| Strbp         | 7.07    | 14.0965 | 0.501542936 |
| Nars2         | 2.287   | 4.56    | 0.501535088 |
| Polr3f        | 3.051   | 6.0835  | 0.501520506 |
| Pdzd4         | 8.868   | 17.683  | 0.501498614 |
| Ift172        | 2.867   | 5.7175  | 0.501442938 |
| N4bp1         | 33.718  | 67.246  | 0.501412723 |
| Gm7689        | 14.273  | 28.4955 | 0.500886105 |
| Pdpk1         | 25.966  | 51.841  | 0.500877684 |

|               |         |         |             |
|---------------|---------|---------|-------------|
| Tmem151b      | 17.265  | 34.4765 | 0.500775891 |
| Fam18a        | 9.015   | 18.003  | 0.500749875 |
| Bloc1s3       | 5.471   | 10.9265 | 0.500709285 |
| Neol          | 9.86    | 19.705  | 0.500380614 |
| Rnf111        | 10.091  | 20.1765 | 0.500136297 |
| Zfp521        | 6.906   | 13.8135 | 0.499945705 |
| Hars2         | 2.098   | 4.1965  | 0.499940427 |
| Dcaf17        | 1.327   | 2.655   | 0.499811676 |
| Zc3h8         | 2.258   | 4.518   | 0.499778663 |
| Moap1         | 2.6895  | 5.3815  | 0.499767723 |
| Spsb4         | 1.0755  | 2.1525  | 0.499651568 |
| Peli3         | 1.748   | 3.4985  | 0.499642704 |
| Zfp276        | 1.3335  | 2.669   | 0.499625328 |
| A130010J15Rik | 2.8275  | 5.661   | 0.499470058 |
| Sepsecs       | 1.433   | 2.8695  | 0.499390138 |
| Dpy1914       | 2.829   | 5.665   | 0.499382171 |
| Idi1          | 5.2325  | 10.48   | 0.499284351 |
| 0610007L01Rik | 10.2485 | 20.5315 | 0.499159828 |
| Mctp1         | 1.896   | 3.799   | 0.499078705 |
| Psph          | 2.5845  | 5.181   | 0.498841922 |
| Tmcc1         | 20.0175 | 40.133  | 0.49877906  |
| Dennd5a       | 19.6865 | 39.4835 | 0.498600681 |
| BC048403      | 2.3875  | 4.789   | 0.498538317 |
| Rab15         | 20.6375 | 41.4075 | 0.498400048 |
| Mudeng        | 1.1635  | 2.3345  | 0.49839366  |
| Ddah1         | 39.151  | 78.5605 | 0.498354771 |
| Atg10         | 4.706   | 9.446   | 0.498200296 |
| Srsf2ip       | 7.2705  | 14.595  | 0.498150051 |
| Slc20a2       | 8.3435  | 16.751  | 0.498089666 |
| Ninj1         | 2.605   | 5.23    | 0.498087954 |
| Foxp1         | 10.688  | 21.459  | 0.49806608  |
| Ccdc144b      | 1.7545  | 3.5245  | 0.497801107 |
| Ganc          | 1.799   | 3.616   | 0.497511062 |
| Tnks2         | 8.059   | 16.204  | 0.497346334 |
| Tmem189       | 2.724   | 5.4805  | 0.497034942 |
| Tyms          | 3.687   | 7.4195  | 0.496933756 |
| Ube2j1        | 43.977  | 88.4985 | 0.496923677 |
| Ppfia4        | 3.5645  | 7.1745  | 0.496829047 |
| Csad          | 2.3425  | 4.716   | 0.496713316 |
| Slc41a2       | 3.895   | 7.8445  | 0.496526229 |
| Lrrcc1        | 3.453   | 6.955   | 0.496477354 |
| BC049807      | 1.7425  | 3.5115  | 0.496226684 |
| Diap1         | 1.897   | 3.824   | 0.496077406 |
| Wiz           | 4.1     | 8.2655  | 0.496037747 |
| Rspry1        | 2.8975  | 5.8425  | 0.495934959 |
| Osbp17        | 3.0825  | 6.2165  | 0.495857798 |
| 4430402I18Rik | 1.574   | 3.1755  | 0.495669973 |
| 2610019F03Rik | 12.4215 | 25.0645 | 0.4955814   |
| Map3k5        | 2.266   | 4.5725  | 0.49557135  |
| Sirt2         | 72.903  | 147.19  | 0.495298594 |
| Zdhhc3        | 4.199   | 8.4795  | 0.495194292 |
| Golga1        | 3.1695  | 6.4015  | 0.495118332 |
| Atad2         | 1.317   | 2.661   | 0.494926719 |
| Bicd2         | 4.997   | 10.0995 | 0.494776969 |
| Shank1        | 35.8535 | 72.484  | 0.494640196 |

|               |          |         |             |
|---------------|----------|---------|-------------|
| Lrrc1         | 2.289    | 4.629   | 0.494491251 |
| Nop2          | 3.94     | 7.97    | 0.494353827 |
| Hrsp12        | 5.963    | 12.0705 | 0.494014332 |
| Phactr3       | 8.876    | 17.968  | 0.493989314 |
| Aasdhppt      | 7.7045   | 15.5975 | 0.493957365 |
| Galnt13       | 4.069    | 8.24    | 0.49381068  |
| Tpx2          | 1.233    | 2.497   | 0.493792551 |
| Iffo2         | 5.1805   | 10.4925 | 0.493733619 |
| Spata13       | 3.0105   | 6.098   | 0.493686455 |
| Thap2         | 4.071    | 8.2495  | 0.493484454 |
| Ankrd54       | 1.0425   | 2.113   | 0.493374349 |
| Ttc39c        | 3.0145   | 6.112   | 0.493210079 |
| Uchl4         | 1.2915   | 2.619   | 0.493127148 |
| Tmem196       | 18.815   | 38.157  | 0.493094321 |
| Mtap7         | 7.532    | 15.2785 | 0.492980332 |
| Pbrm1         | 8.1975   | 16.638  | 0.49269744  |
| Magi3         | 8.7175   | 17.6945 | 0.492667213 |
| Atp1b2        | 110.0255 | 223.349 | 0.492616936 |
| Ilf1f9        | 5.995    | 12.17   | 0.492604766 |
| Nktr          | 9.163    | 18.6015 | 0.492594683 |
| Usp30         | 11.5255  | 23.398  | 0.492584836 |
| Svip          | 5.183    | 10.523  | 0.49254015  |
| Rtp4          | 6.443    | 13.0815 | 0.492527615 |
| Pegf3         | 5.91     | 12.005  | 0.492294877 |
| Ppp1r12b      | 3.9225   | 7.968   | 0.492281627 |
| Rfx1          | 1.606    | 3.2645  | 0.491958952 |
| Cyb5d1        | 4.1175   | 8.3715  | 0.491847339 |
| 1700054N08Rik | 1.8465   | 3.755   | 0.491744341 |
| Dkk3          | 4.881    | 9.927   | 0.491689332 |
| Gpatch8       | 15.904   | 32.346  | 0.49168367  |
| Arl5b         | 1.735    | 3.5295  | 0.491571044 |
| Chrm5         | 1.6635   | 3.386   | 0.491287655 |
| AI987944      | 1.0805   | 2.1995  | 0.491248011 |
| Ttc26         | 1.7745   | 3.6135  | 0.491075135 |
| Kcnk6         | 1.1525   | 2.347   | 0.491052407 |
| Axin1         | 3.3075   | 6.737   | 0.490945525 |
| Prune2        | 5.148    | 10.4995 | 0.490309062 |
| Pbxip1        | 3.023    | 6.1655  | 0.490308977 |
| 5730494N06Rik | 8.742    | 17.831  | 0.490269755 |
| Cuedc1        | 2.808    | 5.7295  | 0.490095122 |
| Coro1b        | 8.864    | 18.105  | 0.489588511 |
| Gpatch4       | 14.928   | 30.4995 | 0.489450647 |
| Mdm2          | 21.4035  | 43.7315 | 0.489429816 |
| Efna5         | 10.598   | 21.6575 | 0.489345492 |
| Recql         | 1.6455   | 3.3635  | 0.489222536 |
| Rgs7bp        | 14.646   | 29.9555 | 0.488925239 |
| Taf3          | 12.725   | 26.0375 | 0.488718195 |
| Etv3          | 3.365    | 6.8865  | 0.488637189 |
| Pcdh15        | 3.755    | 7.6855  | 0.488582395 |
| Evi5          | 8.043    | 16.462  | 0.488579759 |
| Cdc7          | 1.0835   | 2.2185  | 0.488393058 |
| Zdhhc13       | 1.7775   | 3.6395  | 0.488391263 |
| Aplf          | 5.2575   | 10.7685 | 0.488229558 |
| Pi15          | 2.371    | 4.8595  | 0.487910279 |
| Gm10914       | 1.723    | 3.5315  | 0.487894662 |

|               |         |          |             |
|---------------|---------|----------|-------------|
| Scfd2         | 1.209   | 2.478    | 0.487893462 |
| Celf4         | 354.951 | 727.8475 | 0.487672212 |
| Lass4         | 4.8845  | 10.0185  | 0.487548036 |
| Gm5409        | 1.806   | 3.7045   | 0.487515184 |
| Gm10063       | 1.2635  | 2.592    | 0.48746142  |
| Lnx1          | 3.109   | 6.378    | 0.487456883 |
| Slc6a6        | 13.8045 | 28.3245  | 0.487369592 |
| Mbnl2         | 44.9515 | 92.2395  | 0.487334602 |
| Parvg         | 1.202   | 2.4675   | 0.487132725 |
| Cyb5r3        | 38.984  | 80.0365  | 0.487077771 |
| Ssh1          | 2.5985  | 5.335    | 0.487066542 |
| Rhobtb3       | 2.523   | 5.1805   | 0.487018628 |
| Mysm1         | 3.7215  | 7.643    | 0.486916132 |
| Xrcc4         | 1.2435  | 2.554    | 0.48688332  |
| Sirt1         | 1.2665  | 2.6025   | 0.486647454 |
| Ftl1          | 133.49  | 274.3085 | 0.486641865 |
| Fyco1         | 9.251   | 19.0155  | 0.486497857 |
| Unc119b       | 1.47    | 3.022    | 0.486432826 |
| Ppp1r15b      | 5.8565  | 12.04    | 0.486420266 |
| Pgcp          | 1.0035  | 2.0635   | 0.486309668 |
| Slc22a23      | 7.094   | 14.5905  | 0.486206778 |
| Slc48a1       | 10.5925 | 21.7955  | 0.485994815 |
| Gpt2          | 5.5735  | 11.4735  | 0.485771561 |
| Zmym1         | 5.57    | 11.472   | 0.485529986 |
| Fam169b       | 2.5225  | 5.1955   | 0.485516312 |
| Zfp148        | 5.624   | 11.5895  | 0.485266836 |
| Man2b1        | 3.769   | 7.767    | 0.485258143 |
| Abcc1         | 1.2685  | 2.6145   | 0.48517881  |
| Atf6          | 3.0355  | 6.2605   | 0.484865426 |
| Map3k9        | 4.5975  | 9.484    | 0.484763813 |
| AI314976      | 7.4755  | 15.4225  | 0.484713892 |
| Rnf170        | 8.092   | 16.697   | 0.484637959 |
| Chst8         | 1.4965  | 3.088    | 0.484617876 |
| Trim44        | 44.2795 | 91.3985  | 0.484466375 |
| Taf5          | 1.235   | 2.5495   | 0.484408708 |
| Pcdhga8       | 1.6685  | 3.4445   | 0.484395413 |
| Gm608         | 5.2245  | 10.7905  | 0.484175895 |
| Hipk4         | 4.69    | 9.687    | 0.484154021 |
| LOC100503637  | 4.085   | 8.44     | 0.484004739 |
| 2810021B07Rik | 3.171   | 6.5525   | 0.483937428 |
| Aim2          | 1.503   | 3.108    | 0.483590734 |
| Med13l        | 4.284   | 8.8625   | 0.483385049 |
| Mapk1ip1l     | 19.9975 | 41.389   | 0.483159777 |
| Tbc1d15       | 4.0655  | 8.4145   | 0.483154079 |
| Tada2b        | 5.9925  | 12.405   | 0.483071342 |
| Rbm15         | 2.0095  | 4.1605   | 0.482994832 |
| Iqce          | 1.867   | 3.8655   | 0.482990557 |
| Mcph1         | 3.485   | 7.2155   | 0.482988012 |
| Creb1         | 4.5935  | 9.511    | 0.482967091 |
| Sp2           | 5.9655  | 12.3555  | 0.482821416 |
| Synj2         | 6.3195  | 13.0965  | 0.482533501 |
| Sap30bp       | 5.435   | 11.265   | 0.482467821 |
| Zfp879        | 1.921   | 3.982    | 0.482420894 |
| Mre11a        | 1.616   | 3.35     | 0.48238806  |
| Lnx2          | 1.5145  | 3.1405   | 0.48224805  |

|              |         |         |             |
|--------------|---------|---------|-------------|
| Syt15        | 1.3135  | 2.724   | 0.482195301 |
| Mcfd2        | 8.1785  | 16.9665 | 0.482038134 |
| Zfp180       | 5.2705  | 10.9365 | 0.481918347 |
| Txnrd3       | 1.0435  | 2.1655  | 0.481874856 |
| Nr3c1        | 6.7465  | 14.002  | 0.481824025 |
| Fads2        | 8.495   | 17.631  | 0.481821791 |
| Mtf2         | 6.028   | 12.516  | 0.481623522 |
| Senp6        | 19.6705 | 40.845  | 0.481588934 |
| Ugdh         | 5.732   | 11.904  | 0.481518817 |
| Zbtb20       | 16.174  | 33.5935 | 0.481462188 |
| Vmn1r58      | 7.82    | 16.2515 | 0.481186352 |
| Skiv2l       | 9.152   | 19.02   | 0.481177708 |
| Igsf3        | 2.389   | 4.965   | 0.481168177 |
| Gm6710       | 1.65    | 3.4295  | 0.481119697 |
| LOC100504016 | 1.4265  | 2.9675  | 0.480707666 |
| Pet112l      | 2.037   | 4.2385  | 0.48059455  |
| Oraov1       | 2.849   | 5.9285  | 0.480560007 |
| Sun1         | 2.7875  | 5.801   | 0.4805206   |
| Alg10b       | 3.711   | 7.727   | 0.480264009 |
| Odf2l        | 1.5445  | 3.217   | 0.480105689 |
| Spred3       | 9.0295  | 18.8075 | 0.480101024 |
| Trim36       | 1.497   | 3.1185  | 0.48003848  |
| Mvd          | 2.6705  | 5.564   | 0.47996046  |
| Arl13b       | 1.0055  | 2.0955  | 0.479837748 |
| Rgma         | 7.0805  | 14.76   | 0.479708672 |
| Cenpc1       | 6.743   | 14.066  | 0.479382909 |
| Oaz3         | 1.2205  | 2.546   | 0.479379419 |
| Asb7         | 8.1225  | 16.949  | 0.479231813 |
| Taf2         | 8.4435  | 17.62   | 0.479199773 |
| Atxn713      | 8.4155  | 17.5625 | 0.479174377 |
| Kdm4c        | 2.673   | 5.5785  | 0.479161065 |
| Kdm3a        | 2.541   | 5.3035  | 0.479117564 |
| Adat2        | 1.1605  | 2.423   | 0.478951713 |
| Cdk16        | 24.4705 | 51.0955 | 0.47891693  |
| Cpne7        | 3.446   | 7.196   | 0.478877154 |
| Trim26       | 9.675   | 20.204  | 0.478865571 |
| Stag2        | 2.489   | 5.198   | 0.478838015 |
| Dtna         | 18.8505 | 39.3695 | 0.478809739 |
| Rab30        | 2.956   | 6.182   | 0.478162407 |
| Mlxip        | 3.7515  | 7.846   | 0.478141728 |
| Tmem136      | 1.8895  | 3.9525  | 0.478051866 |
| Zmpste24     | 4.3535  | 9.108   | 0.477986386 |
| Sdr42e1      | 1.907   | 3.991   | 0.477825106 |
| Prpf18       | 4.9965  | 10.4585 | 0.477745375 |
| Sfrp1        | 3.802   | 7.9595  | 0.477668195 |
| Ccdc58       | 2.446   | 5.121   | 0.477641086 |
| Nxt2         | 6.8355  | 14.312  | 0.477606205 |
| Mdn1         | 2.9175  | 6.1125  | 0.477300613 |
| Ptprd        | 11.286  | 23.6495 | 0.477219392 |
| Sh3bgrl      | 9.5935  | 20.106  | 0.477146126 |
| Rfwd3        | 3.718   | 7.7925  | 0.477125441 |
| Gpc1         | 2.577   | 5.4015  | 0.477089697 |
| Zfp870       | 1.4655  | 3.072   | 0.477050781 |
| Pds5a        | 5.6485  | 11.8455 | 0.476847748 |
| Zfp612       | 38.365  | 80.4585 | 0.47682967  |



|               |         |         |             |
|---------------|---------|---------|-------------|
| Zic2          | 3.369   | 7.069   | 0.476587919 |
| Aldh2         | 5.296   | 11.1135 | 0.476537544 |
| Mtmr12        | 3.614   | 7.586   | 0.476403902 |
| Zfp799        | 7.1965  | 15.1095 | 0.476289751 |
| Larp4b        | 17.288  | 36.313  | 0.476082946 |
| Akap2         | 14.578  | 30.6255 | 0.476008555 |
| Pold4         | 5.848   | 12.286  | 0.47598893  |
| Fam135a       | 1.8235  | 3.8315  | 0.475923268 |
| Spag9         | 20.4335 | 42.941  | 0.475850586 |
| Leo1          | 20.918  | 43.9635 | 0.475803792 |
| 2410075B13Rik | 1.389   | 2.9195  | 0.475766398 |
| Eaf2          | 6.067   | 12.753  | 0.475731201 |
| 3110062M04Rik | 1.141   | 2.3985  | 0.475713988 |
| Sh3d19        | 1.9635  | 4.1275  | 0.47571169  |
| Gm14288       | 6.082   | 12.787  | 0.475639321 |
| Gpr45         | 2.4725  | 5.2     | 0.475480769 |
| Itgb1bp3      | 1.7465  | 3.6745  | 0.475302762 |
| Fkbp14        | 1.435   | 3.0195  | 0.475244246 |
| Trim13        | 1.6975  | 3.572   | 0.475223964 |
| Gm3667        | 1.222   | 2.5715  | 0.475209022 |
| Tbl1xr1       | 8.6975  | 18.306  | 0.475117448 |
| Capn2         | 14.416  | 30.353  | 0.474944816 |
| Zfyve26       | 1.075   | 2.264   | 0.474823322 |
| Tet3          | 5.8275  | 12.273  | 0.474822782 |
| 2010015L04Rik | 4.4655  | 9.408   | 0.474649235 |
| 5730419I09Rik | 8.4435  | 17.7905 | 0.474607234 |
| Fam185a       | 3.9315  | 8.2875  | 0.47438914  |
| Tyro3         | 1.673   | 3.5275  | 0.474273565 |
| Slc24a6       | 1.0765  | 2.27    | 0.474229075 |
| Hdhd3         | 2.4995  | 5.2715  | 0.474153467 |
| Rabep1        | 10.4745 | 22.095  | 0.474066531 |
| Heca          | 2.5505  | 5.3805  | 0.474026577 |
| 0610007P22Rik | 5.592   | 11.798  | 0.47397864  |
| Zfp821        | 3.8665  | 8.1595  | 0.47386482  |
| Sema4b        | 2.246   | 4.7425  | 0.473589879 |
| Cntn2         | 4.3015  | 9.0835  | 0.473550944 |
| Pum1          | 13.8215 | 29.1955 | 0.473411998 |
| Fam126b       | 9.776   | 20.6605 | 0.473173447 |
| Chst3         | 1.3215  | 2.7935  | 0.473062466 |
| Foxj2         | 7.4415  | 15.7375 | 0.472851469 |
| Zfp871        | 16.7755 | 35.4875 | 0.472715745 |
| Mllt3         | 12.805  | 27.093  | 0.472631307 |
| Laptn4b       | 7.789   | 16.4935 | 0.472246643 |
| C530008M17Rik | 12.782  | 27.0665 | 0.472244287 |
| Ldlrad2       | 1.814   | 3.8415  | 0.472211376 |
| Tnfrsf13c     | 1.797   | 3.806   | 0.472149238 |
| Unc5c         | 3.5435  | 7.508   | 0.471963239 |
| Hook3         | 11.938  | 25.2955 | 0.47194165  |
| Arhgef4       | 23.152  | 49.0745 | 0.471772509 |
| 4833439L19Rik | 49.9995 | 105.985 | 0.471760155 |
| Fgfr1op2      | 16.945  | 35.9235 | 0.4716968   |
| Cds2          | 35.8475 | 76.0175 | 0.471569047 |
| Slc23a1       | 1.9735  | 4.1865  | 0.471396154 |
| Diap2         | 1.2735  | 2.7025  | 0.471230342 |
| Zbtb5         | 1.1105  | 2.357   | 0.471149767 |

|               |         |         |             |
|---------------|---------|---------|-------------|
| Mmd2          | 7.8345  | 16.629  | 0.471134765 |
| Cbl           | 7.8485  | 16.659  | 0.471126718 |
| Cntn3         | 2.781   | 5.9035  | 0.47107648  |
| Ccdc97        | 14.069  | 29.868  | 0.471039239 |
| Ica11         | 8.5765  | 18.2115 | 0.470938693 |
| Hccs          | 3.172   | 6.7365  | 0.470867661 |
| Snn           | 9.5975  | 20.383  | 0.470858068 |
| Tnfsf10       | 1.092   | 2.3205  | 0.470588235 |
| Leprot        | 3.9675  | 8.435   | 0.470361589 |
| Tacc3         | 1.3275  | 2.823   | 0.470244421 |
| Hs3st4        | 3.1195  | 6.638   | 0.469945767 |
| Parva         | 9.306   | 19.8215 | 0.4694902   |
| Slc25a15      | 1.162   | 2.4765  | 0.469210579 |
| Alox8         | 4.0885  | 8.714   | 0.469187514 |
| Eaf1          | 4.4565  | 9.4995  | 0.469129954 |
| Npc1          | 7.832   | 16.7025 | 0.46891184  |
| LOC100504453  | 1.4015  | 2.989   | 0.468885915 |
| Nvl           | 5.3905  | 11.497  | 0.468861442 |
| Doc2b         | 7.4895  | 15.974  | 0.46885564  |
| Pstpip2       | 7.295   | 15.568  | 0.468589414 |
| Rbbp9         | 8.6585  | 18.4835 | 0.468444829 |
| Xkr6          | 2.243   | 4.7885  | 0.468413908 |
| Txndc16       | 4.435   | 9.48    | 0.467827004 |
| Gm4951        | 3.374   | 7.213   | 0.467766533 |
| Ccdc109a      | 2.9955  | 6.405   | 0.467681499 |
| Nap113        | 20.505  | 43.8485 | 0.467632872 |
| Ppfia1        | 7.7075  | 16.4875 | 0.46747536  |
| LOC100502613  | 4.901   | 10.485  | 0.467429661 |
| Rpe           | 2.0705  | 4.4315  | 0.467223288 |
| Zfp607        | 3.067   | 6.566   | 0.467103259 |
| Eml3          | 1.469   | 3.1465  | 0.466867949 |
| Chd1          | 1.96    | 4.199   | 0.466777804 |
| Scai          | 3.4665  | 7.427   | 0.466742965 |
| Papss2        | 4.954   | 10.614  | 0.466742039 |
| Wipi1         | 4.281   | 9.177   | 0.466492318 |
| Fam120a       | 12.28   | 26.3295 | 0.466397007 |
| Elp4          | 2.9295  | 6.2825  | 0.466295265 |
| Ahcy11        | 39.2055 | 84.0815 | 0.46627974  |
| Zzz3          | 5.553   | 11.915  | 0.466051196 |
| Zbtb26        | 1.497   | 3.2145  | 0.465702287 |
| Dazap2        | 62.1985 | 133.608 | 0.465529759 |
| Atp13a3       | 3.807   | 8.1785  | 0.465488782 |
| Bbs7          | 2.152   | 4.6245  | 0.465347605 |
| 2210018M11Rik | 16.033  | 34.4575 | 0.465297831 |
| 2810403A07Rik | 10.6865 | 22.9755 | 0.465125895 |
| Nipa1         | 4.1455  | 8.9145  | 0.465028886 |
| C130039O16Rik | 3.416   | 7.3465  | 0.464983325 |
| Gm2506        | 2.6905  | 5.7865  | 0.464961548 |
| Ccl27b        | 2.6905  | 5.7865  | 0.464961548 |
| Sipa112       | 2.894   | 6.2245  | 0.464936943 |
| Kcnj6         | 7.6805  | 16.521  | 0.464893166 |
| Tbp           | 9.3615  | 20.137  | 0.4648905   |
| Nudt10        | 4.603   | 9.9015  | 0.464879059 |
| Lamp2         | 8.706   | 18.7275 | 0.464877853 |
| Rps6ka6       | 4.307   | 9.266   | 0.464817613 |

|               |          |         |             |
|---------------|----------|---------|-------------|
| Ccdc66        | 3.1655   | 6.813   | 0.464626449 |
| Fbxl17        | 5.5585   | 11.9655 | 0.464543897 |
| Rims1         | 6.904    | 14.867  | 0.464384207 |
| Tulp4         | 33.111   | 71.346  | 0.464090489 |
| Zscan18       | 5.8435   | 12.5925 | 0.464046059 |
| Gria2         | 35.003   | 75.434  | 0.464021529 |
| Cntln         | 3.461    | 7.46    | 0.463941019 |
| Ipmk          | 6.3465   | 13.6805 | 0.463908483 |
| Wdr26         | 12.3355  | 26.5905 | 0.463906282 |
| Inhba         | 1.423    | 3.0675  | 0.463895681 |
| Socs7         | 4.8705   | 10.501  | 0.46381297  |
| Gm14326       | 9.382    | 20.2285 | 0.463801073 |
| 2210012G02Rik | 4.897    | 10.564  | 0.463555471 |
| Fli1          | 1.5195   | 3.28    | 0.463262195 |
| Sil1          | 2.6605   | 5.743   | 0.46325962  |
| Zfp300        | 1.5295   | 3.303   | 0.463063881 |
| Rmnd5a        | 7.851    | 16.9595 | 0.462926383 |
| Zfp212        | 1.4855   | 3.209   | 0.462916797 |
| Klhdc5        | 4.0925   | 8.8425  | 0.4628216   |
| Gm8008        | 1.015    | 2.1935  | 0.462730796 |
| Clstn2        | 6.6795   | 14.435  | 0.462729477 |
| 6030422M02Rik | 1.722    | 3.7225  | 0.462592344 |
| Dgkh          | 2.654    | 5.7385  | 0.462490198 |
| Fez1          | 33.871   | 73.237  | 0.46248481  |
| LOC100504691  | 5.243    | 11.337  | 0.462468025 |
| Tub           | 19.632   | 42.4675 | 0.462282922 |
| Chordc1       | 14.6725  | 31.7425 | 0.462235174 |
| Actr2         | 65.0665  | 140.786 | 0.462165982 |
| Baz2a         | 4.8495   | 10.493  | 0.462165253 |
| Lifr          | 2.5315   | 5.479   | 0.462036868 |
| Palm2         | 15.062   | 32.616  | 0.461797891 |
| Bgn           | 1.5915   | 3.4465  | 0.461772813 |
| Poglut1       | 10.2945  | 22.2945 | 0.461750656 |
| Tnpo1         | 4.4      | 9.533   | 0.4615546   |
| Aldoc         | 145.5075 | 315.495 | 0.461203823 |
| Nudt5         | 1.7255   | 3.7425  | 0.461055444 |
| 8030462N17Rik | 4.641    | 10.0705 | 0.460851    |
| Nkain2        | 6.1635   | 13.377  | 0.460753532 |
| Hecw2         | 2.4895   | 5.407   | 0.460421676 |
| Bdh1          | 3.135    | 6.8105  | 0.460318626 |
| Zfp280c       | 3.5825   | 7.7865  | 0.460091183 |
| Gabra2        | 5.4435   | 11.8325 | 0.460046482 |
| Naa16         | 1.5105   | 3.2835  | 0.46002741  |
| Tars2         | 1.107    | 2.4065  | 0.460004155 |
| Mdp1          | 7.577    | 16.4735 | 0.45995083  |
| Pcnt          | 1.783    | 3.878   | 0.459773079 |
| Etl4          | 5.531    | 12.0305 | 0.45974814  |
| Appl1         | 7.89     | 17.1625 | 0.459723234 |
| Gm14149       | 18.6155  | 40.4945 | 0.459704404 |
| Fam168a       | 33.3435  | 72.5725 | 0.459450894 |
| Ifnar1        | 7.294    | 15.8775 | 0.459392222 |
| Safb2         | 8.4615   | 18.421  | 0.459339884 |
| Bdp1          | 4.143    | 9.021   | 0.459261723 |
| Eno3          | 1.056    | 2.2995  | 0.459230267 |
| Eps1511       | 29.8085  | 64.946  | 0.458973609 |

|                    |         |          |             |
|--------------------|---------|----------|-------------|
| Tubgcp5            | 3.6115  | 7.8695   | 0.458923693 |
| Atp8b2             | 2.8115  | 6.1265   | 0.458908023 |
| Trip11             | 7.365   | 16.055   | 0.458735596 |
| Gm5860             | 1.4475  | 3.1555   | 0.458722865 |
| Nol10              | 4.277   | 9.326    | 0.458610337 |
| Gm10856            | 2.025   | 4.417    | 0.458455966 |
| Taf15              | 5.813   | 12.682   | 0.458366188 |
| Hnrnpul2           | 34.794  | 75.924   | 0.458274064 |
| Fam174b            | 3.27    | 7.1355   | 0.45827202  |
| Cxxc5              | 13.232  | 28.887   | 0.458060719 |
| Ankrd10            | 6.489   | 14.17    | 0.457939308 |
| Dclre1c            | 6.561   | 14.3275  | 0.457930553 |
| Khdrbs2            | 6.979   | 15.253   | 0.457549335 |
| Clmn               | 6.1105  | 13.357   | 0.457475481 |
| Map3k1             | 1.4765  | 3.229    | 0.45726231  |
| Kcna6              | 12.6215 | 27.605   | 0.457217895 |
| S100a11            | 11.6885 | 25.5645  | 0.457216061 |
| Btbd16             | 2.336   | 5.1095   | 0.457187592 |
| OTTMUSG00000016609 | 8.056   | 17.624   | 0.457103949 |
| Hyal3              | 2.2345  | 4.8895   | 0.456999693 |
| 1200011118Rik      | 3.8005  | 8.317    | 0.456955633 |
| Map3k11            | 3.8295  | 8.382    | 0.456871868 |
| Dimt1              | 3.142   | 6.8775   | 0.456852054 |
| Tfrc               | 3.107   | 6.8035   | 0.456676711 |
| Cend1              | 10.075  | 22.0755  | 0.456388304 |
| Pank3              | 5.683   | 12.455   | 0.456282617 |
| Spopl              | 1.5575  | 3.4135   | 0.456276549 |
| Fahd2a             | 3.2085  | 7.034    | 0.456141598 |
| Mfap3              | 2.507   | 5.497    | 0.456066946 |
| Rfx7               | 11.2745 | 24.7285  | 0.455931415 |
| LOC100504226       | 11.0455 | 24.23    | 0.455860504 |
| Cox11              | 4.495   | 9.8605   | 0.455859236 |
| Solh               | 2.2565  | 4.951    | 0.455766512 |
| LOC100503726       | 1.66    | 3.645    | 0.455418381 |
| Wdfy2              | 1.166   | 2.561    | 0.455290902 |
| Gm14217            | 18.2125 | 40.019   | 0.455096329 |
| Gm9951             | 1.1915  | 2.6185   | 0.455031507 |
| Wdfy1              | 2.4965  | 5.4865   | 0.455025973 |
| Far1               | 5.399   | 11.867   | 0.45495913  |
| Cxxc4              | 10.016  | 22.021   | 0.454838563 |
| Acot11             | 3.78    | 8.311    | 0.454818915 |
| Hjulp              | 3.171   | 6.9755   | 0.454591069 |
| Tubb4              | 575.432 | 1265.829 | 0.454589048 |
| Neu1               | 3.8455  | 8.4595   | 0.454577694 |
| Ano4               | 2.8235  | 6.2135   | 0.454413776 |
| Strn3              | 13.134  | 28.9055  | 0.454377195 |
| Rab3c              | 50.9335 | 112.0965 | 0.454371903 |
| Mgll               | 3.195   | 7.0325   | 0.454319232 |
| Adal               | 3.8165  | 8.4015   | 0.45426412  |
| Ceng1              | 5.744   | 12.646   | 0.454214771 |
| N6amt1             | 15.0505 | 33.136   | 0.454203887 |
| Pik3r1             | 13.13   | 28.911   | 0.454152399 |
| LOC100504174       | 3.748   | 8.253    | 0.454137889 |
| Gls                | 52.0655 | 114.659  | 0.454089954 |
| Bmpr2              | 29.6985 | 65.4215  | 0.453956268 |

|               |         |          |             |
|---------------|---------|----------|-------------|
| Luzp2         | 5.451   | 12.011   | 0.453833986 |
| Nptx1         | 7.06    | 15.562   | 0.453669194 |
| Negr1         | 26.646  | 58.741   | 0.453618427 |
| Enox2         | 2.1565  | 4.7545   | 0.453570302 |
| Asxl2         | 4.276   | 9.429    | 0.453494538 |
| Decr1         | 1.3485  | 2.974    | 0.453429724 |
| Serp1         | 5.9855  | 13.204   | 0.453309603 |
| Irf2bp2       | 35.5645 | 78.518   | 0.452947095 |
| Chd9          | 6.6755  | 14.74    | 0.452883311 |
| Rg9mtd1       | 3.4015  | 7.5115   | 0.45283898  |
| Igf1          | 1.2665  | 2.797    | 0.452806578 |
| Ppp1cb        | 16.6005 | 36.677   | 0.452613354 |
| Kctd6         | 4.3865  | 9.694    | 0.45249639  |
| 2810046L04Rik | 5.8095  | 12.8405  | 0.452435653 |
| Ttc9c         | 10.5555 | 23.365   | 0.451765461 |
| Fbxl20        | 3.48    | 7.704    | 0.451713396 |
| Gxylt1        | 3.2215  | 7.138    | 0.451316895 |
| Src           | 2.7555  | 6.106    | 0.451277432 |
| Phkb          | 3.1145  | 6.902    | 0.451246016 |
| Atxn1         | 6.8065  | 15.085   | 0.451209811 |
| Mpp6          | 14.495  | 32.1355  | 0.451058798 |
| 4933427D14Rik | 2.5125  | 5.5725   | 0.450874832 |
| Cbfb          | 4.996   | 11.083   | 0.450780475 |
| Gpr157        | 1.681   | 3.7295   | 0.450730661 |
| Ctnnd1        | 5.286   | 11.728   | 0.450716235 |
| Eml1          | 6.6275  | 14.7175  | 0.450314252 |
| Etnk1         | 34.967  | 77.6715  | 0.450190868 |
| Enpp4         | 2.3905  | 5.31     | 0.450188324 |
| Ptpn1         | 2.989   | 6.6405   | 0.450116708 |
| Th            | 7.024   | 15.607   | 0.450054463 |
| LOC100503059  | 2.8255  | 6.2815   | 0.449812943 |
| 1500012F01Rik | 16.734  | 37.213   | 0.449681563 |
| Zfp780b       | 4.002   | 8.906    | 0.449359982 |
| Ipo11         | 4.5355  | 10.094   | 0.449326332 |
| Twistnb       | 2.367   | 5.2715   | 0.449018306 |
| Gm13298       | 6.9835  | 15.5545  | 0.448969752 |
| Caml          | 3.5495  | 7.906    | 0.448962813 |
| Gpr89         | 3.499   | 7.794    | 0.448935078 |
| E430029J22Rik | 3.0085  | 6.7025   | 0.448862365 |
| Utp3          | 47.4755 | 105.7715 | 0.448849643 |
| Hexb          | 7.064   | 15.7425  | 0.448721613 |
| Ctbp2         | 5.569   | 12.4165  | 0.448516087 |
| A430078G23Rik | 3.2355  | 7.216    | 0.448378603 |
| Tacc1         | 8.2985  | 18.508   | 0.448373676 |
| 1700025G04Rik | 12.1555 | 27.117   | 0.448261238 |
| Mlec          | 15.4245 | 34.4105  | 0.448249807 |
| Pclo          | 19.5975 | 43.733   | 0.448116983 |
| Ttc8          | 7.07    | 15.7815  | 0.447992903 |
| Bach2         | 1.812   | 4.0455   | 0.44790508  |
| Prrg4         | 1.5385  | 3.435    | 0.447889374 |
| Stau1         | 17.2285 | 38.469   | 0.447854116 |
| Rbck1         | 5.999   | 13.396   | 0.447820245 |
| Slain2        | 3.665   | 8.1845   | 0.447797666 |
| Bace1         | 7.6125  | 17.0015  | 0.44775461  |
| Josd2         | 9.0245  | 20.1605  | 0.447632747 |

|               |         |         |             |
|---------------|---------|---------|-------------|
| Uprt          | 4.3615  | 9.745   | 0.447562853 |
| Tram1         | 6.8995  | 15.416  | 0.447554489 |
| Myst4         | 8.57    | 19.149  | 0.447542953 |
| Psmb8         | 6.093   | 13.6215 | 0.447307565 |
| Nedd9         | 1.551   | 3.4685  | 0.447167363 |
| Lipe          | 1.269   | 2.839   | 0.446988376 |
| Rela          | 2.2445  | 5.0215  | 0.446977995 |
| 1200016B10Rik | 1.7555  | 3.928   | 0.446919552 |
| Tax1bp1       | 19.7475 | 44.2115 | 0.446659806 |
| Eps15         | 29.8945 | 66.998  | 0.446199887 |
| Gm8159        | 1.51    | 3.3845  | 0.446151573 |
| Ppp2r3a       | 4.7525  | 10.6545 | 0.446055657 |
| Fnip2         | 2.638   | 5.918   | 0.445758702 |
| Gucy1a2       | 4.8445  | 10.868  | 0.445758189 |
| Lca5          | 1.2355  | 2.774   | 0.445385725 |
| Pitpnc1       | 9.772   | 21.945  | 0.445295056 |
| Ulk2          | 6.405   | 14.3865 | 0.44520905  |
| Ccdc153       | 1.7725  | 3.9835  | 0.444960462 |
| Kcna1         | 5.537   | 12.4475 | 0.444828279 |
| Rac2          | 2.7225  | 6.121   | 0.444780265 |
| Dixdc1        | 8.278   | 18.615  | 0.444695138 |
| Tmem206       | 3.969   | 8.928   | 0.444556452 |
| B3gatl        | 1.638   | 3.685   | 0.444504749 |
| Add2          | 20.0545 | 45.1235 | 0.444435826 |
| Zfp664        | 29.724  | 66.905  | 0.444271729 |
| Pfkfb2        | 6.3985  | 14.4025 | 0.444263149 |
| C3ar1         | 1.6055  | 3.614   | 0.444244604 |
| Rapgef1       | 16.7015 | 37.6005 | 0.444182923 |
| 2900026A02Rik | 4.4035  | 9.9145  | 0.444147461 |
| Tbcd          | 5.175   | 11.6545 | 0.444034493 |
| Gbp4          | 1.5995  | 3.603   | 0.443935609 |
| Akt3          | 14.193  | 31.979  | 0.443822509 |
| Acbd3         | 8.3515  | 18.819  | 0.443780222 |
| Taok1         | 9.9145  | 22.3415 | 0.443770562 |
| Utp14a        | 2.467   | 5.5595  | 0.443744941 |
| Rnf24         | 5.419   | 12.2165 | 0.443580404 |
| Heatr3        | 3.9475  | 8.8995  | 0.443564245 |
| Klhl21        | 5.4355  | 12.255  | 0.443533252 |
| Ppp1r12a      | 12.834  | 28.94   | 0.443469247 |
| Csnk2a2       | 5.45    | 12.2935 | 0.443323708 |
| Samd4b        | 13.952  | 31.4785 | 0.443223152 |
| Klhl20        | 8.08    | 18.2305 | 0.443213296 |
| Mfhas1        | 4.8105  | 10.854  | 0.443200663 |
| F11r          | 1.0685  | 2.4115  | 0.443085217 |
| Ccnyl1        | 2.16    | 4.875   | 0.443076923 |
| Vti1a         | 15.641  | 35.3085 | 0.442981152 |
| Lactb2        | 4.225   | 9.538   | 0.442964982 |
| Ikzf4         | 3.3875  | 7.6485  | 0.4428973   |
| Slc25a35      | 1.8575  | 4.197   | 0.442578032 |
| Gm3405        | 1.6545  | 3.739   | 0.442497994 |
| Trp53bp2      | 9.9175  | 22.4185 | 0.442380177 |
| Rims2         | 8.9425  | 20.2185 | 0.44229295  |
| LOC100504323  | 1.8105  | 4.0955  | 0.442070565 |
| Plekha1       | 14.761  | 33.3915 | 0.442058608 |
| Ascl1         | 4.068   | 9.2035  | 0.442005759 |

|               |         |         |             |
|---------------|---------|---------|-------------|
| D17Wsu92e     | 24.574  | 55.5975 | 0.441998291 |
| Pigb          | 6.199   | 14.0325 | 0.4417602   |
| Fem1c         | 4.129   | 9.347   | 0.441746015 |
| Ankib1        | 7.7275  | 17.498  | 0.4416219   |
| Gm14420       | 14.5355 | 32.9265 | 0.441452933 |
| Xpo5          | 6.3795  | 14.4545 | 0.441350444 |
| Taf1d         | 3.1925  | 7.2345  | 0.441288271 |
| Samd4         | 13.7225 | 31.1015 | 0.441216662 |
| Twf1          | 14.3965 | 32.6325 | 0.441170612 |
| Trmt2a        | 3.4305  | 7.7765  | 0.441136758 |
| Klf16         | 1.257   | 2.8495  | 0.441130023 |
| Rgs17         | 27.6105 | 62.603  | 0.441041164 |
| Zfp238        | 3.7605  | 8.528   | 0.440959193 |
| BC019943      | 4.516   | 10.2455 | 0.440778879 |
| Btd           | 2.11    | 4.7905  | 0.440455067 |
| Smox          | 4.621   | 10.493  | 0.440388831 |
| Akr1b3        | 21.7445 | 49.377  | 0.440377099 |
| Dpp8          | 13.7    | 31.1145 | 0.440309181 |
| Fat3          | 3.698   | 8.4     | 0.440238095 |
| Arid4a        | 12.137  | 27.597  | 0.439794181 |
| Slc38a2       | 12.996  | 29.561  | 0.439633301 |
| Ddx3y         | 2.8125  | 6.398   | 0.439590497 |
| Lonrf3        | 1.5325  | 3.488   | 0.439363532 |
| Fars2         | 1.367   | 3.1115  | 0.43933794  |
| Acot2         | 6.428   | 14.632  | 0.439311099 |
| Ppapdc2       | 8.0835  | 18.406  | 0.439177442 |
| Synrg         | 17.542  | 39.951  | 0.439087883 |
| Mxi1          | 5.9395  | 13.534  | 0.438857692 |
| Slc31a2       | 4.277   | 9.75    | 0.438666667 |
| Arfp1         | 4.022   | 9.1705  | 0.43858023  |
| Zfp7          | 2.5605  | 5.8385  | 0.438554423 |
| Gpatch1       | 10.1305 | 23.1015 | 0.438521308 |
| Ctage5        | 5.27    | 12.0215 | 0.438381234 |
| Cenpb         | 2.138   | 4.8775  | 0.438339313 |
| Lrrc8c        | 3.7615  | 8.583   | 0.438250029 |
| Gca           | 6.7415  | 15.3895 | 0.438058416 |
| Rhag          | 1.099   | 2.51    | 0.437848606 |
| Rgs8          | 35.125  | 80.2245 | 0.437833829 |
| Ezr           | 1.8975  | 4.3365  | 0.437564856 |
| Myef2         | 10.9535 | 25.057  | 0.437143313 |
| Atm           | 1.053   | 2.409   | 0.437110834 |
| Gm3325        | 4.668   | 10.6835 | 0.436935461 |
| Uimc1         | 1.315   | 3.011   | 0.436731983 |
| Syne1         | 12.519  | 28.6665 | 0.436711841 |
| Dffa          | 9.292   | 21.278  | 0.436695178 |
| Gm14340       | 8.396   | 19.2285 | 0.436643524 |
| Ric8b         | 14.964  | 34.2745 | 0.436592802 |
| Heatr6        | 3.377   | 7.7355  | 0.436558723 |
| Ptpn21        | 1.4005  | 3.209   | 0.436428794 |
| Rundc1        | 8.2835  | 18.981  | 0.436410094 |
| 3110057O12Rik | 2.2605  | 5.181   | 0.436305732 |
| Cdkl2         | 9.099   | 20.8565 | 0.436266871 |
| A730037C10Rik | 1.233   | 2.827   | 0.436151397 |
| Strn          | 7.56    | 17.3425 | 0.43592331  |
| Esyt2         | 1.906   | 4.3735  | 0.435806562 |

|               |         |         |             |
|---------------|---------|---------|-------------|
| Psd2          | 22.9775 | 52.7385 | 0.435687401 |
| C330019G07Rik | 7.499   | 17.213  | 0.435659095 |
| Zfp58         | 1.033   | 2.3715  | 0.435589289 |
| C80913        | 10.0495 | 23.077  | 0.435476882 |
| Plin3         | 2.107   | 4.8405  | 0.435285611 |
| Serpini1      | 6.89    | 15.8355 | 0.435098355 |
| Mapkapk2      | 3.3365  | 7.669   | 0.435063242 |
| 2010106G01Rik | 3.7585  | 8.639   | 0.435061928 |
| Adat1         | 1.5325  | 3.523   | 0.434998581 |
| Fam129b       | 1.294   | 2.9755  | 0.434884893 |
| Akap7         | 5.1235  | 11.785  | 0.43474756  |
| Mex3b         | 1.1475  | 2.641   | 0.43449451  |
| Fbxw2         | 7.709   | 17.744  | 0.434456718 |
| Ctxn3         | 1.406   | 3.2365  | 0.434419898 |
| B3galt2       | 1.974   | 4.5445  | 0.434371218 |
| Pskh1         | 1.3595  | 3.13    | 0.434345048 |
| Etv6          | 2.231   | 5.1365  | 0.434342451 |
| Sh2b3         | 1.1995  | 2.762   | 0.434286749 |
| Mboat2        | 2.213   | 5.098   | 0.434091801 |
| Gla           | 3.128   | 7.209   | 0.433902067 |
| H2afv         | 4.955   | 11.4205 | 0.43386892  |
| Ppm1f         | 7.2785  | 16.7805 | 0.433747505 |
| Zfp345        | 1.8035  | 4.1585  | 0.433690032 |
| Ubxn10        | 1.0015  | 2.31    | 0.433549784 |
| Eif4e3        | 4.3875  | 10.121  | 0.433504594 |
| Ino80         | 2.2235  | 5.1295  | 0.433473048 |
| Gm5081        | 1.59    | 3.6685  | 0.433419654 |
| Sytl2         | 4.0685  | 9.391   | 0.433233947 |
| Aggf1         | 13.7355 | 31.7185 | 0.433043807 |
| Erbb4         | 4.8015  | 11.098  | 0.432645522 |
| Ankzf1        | 1.299   | 3.003   | 0.432567433 |
| Gatsl2        | 32.357  | 74.819  | 0.432470362 |
| A230046K03Rik | 4.204   | 9.7255  | 0.432265693 |
| F2r           | 1.5105  | 3.4945  | 0.43225068  |
| Ntsr1         | 1.4785  | 3.422   | 0.432057276 |
| Zadh2         | 2.3725  | 5.4915  | 0.432031321 |
| Tysnd1        | 1.3445  | 3.113   | 0.43189849  |
| Ikbkg         | 2.1475  | 4.9725  | 0.431875314 |
| Zfp459        | 2.252   | 5.2165  | 0.431707083 |
| Fbrs11        | 3.0955  | 7.1715  | 0.431639127 |
| 9930021J03Rik | 12.5655 | 29.112  | 0.431626134 |
| Tm9sf1        | 3.5975  | 8.3375  | 0.431484258 |
| Mterfd2       | 2.3565  | 5.4625  | 0.431395881 |
| Glcc1         | 2.6635  | 6.1745  | 0.431370961 |
| Nfat5         | 5.4105  | 12.548  | 0.431184252 |
| Tecpr1        | 2.1485  | 4.9855  | 0.430949754 |
| Tmem183a      | 10.252  | 23.792  | 0.430901143 |
| D130062J21Rik | 1.522   | 3.533   | 0.430795358 |
| Atxn3         | 2.239   | 5.1975  | 0.430784031 |
| Srsf12        | 10.213  | 23.728  | 0.430419757 |
| Rimklb        | 6.8565  | 15.9325 | 0.430346775 |
| Ccm2          | 7.3495  | 17.0785 | 0.430336388 |
| Cog2          | 2.581   | 5.9985  | 0.430274235 |
| 1810031K17Rik | 1.98    | 4.603   | 0.430154247 |
| Dbt           | 3.6425  | 8.4685  | 0.430123398 |



|               |         |          |             |
|---------------|---------|----------|-------------|
| Pbx1          | 37.1915 | 86.53    | 0.42981047  |
| Hist1h1c      | 4.179   | 9.725    | 0.429717224 |
| Stx4a         | 53.4025 | 124.2815 | 0.429689857 |
| P2rx4         | 1.4325  | 3.334    | 0.429664067 |
| 2310001H12Rik | 3.335   | 7.763    | 0.429601958 |
| Pus7          | 1.6955  | 3.948    | 0.429457953 |
| 5730455P16Rik | 14.8195 | 34.5285  | 0.429196171 |
| Hs3st1        | 2.8995  | 6.759    | 0.428983577 |
| Baz2b         | 6.2205  | 14.504   | 0.428881688 |
| Rnf114        | 15.9955 | 37.3065  | 0.428759063 |
| Vps13a        | 1.142   | 2.664    | 0.428678679 |
| Pitrm1        | 3.5955  | 8.3925   | 0.428418231 |
| Chac2         | 3.504   | 8.181    | 0.428309498 |
| Scd2          | 70.9905 | 165.754  | 0.428288307 |
| Nos1          | 3.7415  | 8.739    | 0.428138231 |
| Ctla2a        | 2.5695  | 6.008    | 0.42767976  |
| Ccdc41        | 3.8845  | 9.0865   | 0.427502339 |
| Klf5          | 3.6595  | 8.561    | 0.427461745 |
| Arid4b        | 6.9555  | 16.285   | 0.427110838 |
| Zfp442        | 1.0515  | 2.462    | 0.427091795 |
| Rpap2         | 5.604   | 13.125   | 0.426971429 |
| Aheyl2        | 11.5095 | 26.9565  | 0.426965667 |
| Usp18         | 3.481   | 8.153    | 0.426959401 |
| Katnal1       | 17.1595 | 40.196   | 0.426895711 |
| Enho          | 4.9345  | 11.561   | 0.426822939 |
| Fbxo30        | 1.21    | 2.835    | 0.42680776  |
| Hnrpd1        | 18.0055 | 42.2095  | 0.426574586 |
| Nek4          | 3.086   | 7.235    | 0.426537664 |
| Fam163a       | 1.275   | 2.991    | 0.426278837 |
| Atp6v0e       | 4.992   | 11.7115  | 0.426247705 |
| Prdm16        | 1.538   | 3.6085   | 0.426215879 |
| Phactr2       | 5.5875  | 13.1125  | 0.426120114 |
| Lrrn4cl       | 2.669   | 6.2645   | 0.42605156  |
| Utp6          | 7.6345  | 17.922   | 0.425984823 |
| Ptpn4         | 4.818   | 11.322   | 0.42554319  |
| Pik3c2a       | 2.2535  | 5.296    | 0.425509819 |
| Slc39a3       | 1.798   | 4.226    | 0.425461429 |
| Napb          | 78.945  | 185.676  | 0.425176113 |
| Brf1          | 3.047   | 7.1665   | 0.425172678 |
| Ctdspl        | 3.944   | 9.279    | 0.425045802 |
| Cmah          | 3.184   | 7.4945   | 0.424844886 |
| LOC100504155  | 3.3095  | 7.791    | 0.424785008 |
| Dak           | 2.0785  | 4.8935   | 0.424747114 |
| Slc25a42      | 7.1835  | 16.916   | 0.424657129 |
| Zfp316        | 2.324   | 5.475    | 0.424474886 |
| Pip4k2c       | 7.8545  | 18.5045  | 0.424464319 |
| Gpr172b       | 1.1265  | 2.654    | 0.424453655 |
| Zfp617        | 6.1435  | 14.474   | 0.424450739 |
| Cyld          | 10.768  | 25.374   | 0.424371404 |
| Sox12         | 1.802   | 4.2465   | 0.424349464 |
| B3galt1       | 3.3875  | 7.9835   | 0.424312645 |
| Tbc1d5        | 3.87    | 9.125    | 0.424109589 |
| Etfdh         | 4.6085  | 10.8705  | 0.423945541 |
| Ptpre         | 6.6565  | 15.7075  | 0.42377845  |
| Gm4478        | 4.8865  | 11.552   | 0.423000346 |

|               |         |         |             |
|---------------|---------|---------|-------------|
| Mtus2         | 5.2435  | 12.396  | 0.422999355 |
| Cyth1         | 3.6555  | 8.648   | 0.42269889  |
| Irf2          | 5.664   | 13.4015 | 0.422639257 |
| Nacad         | 4.6795  | 11.0725 | 0.422623617 |
| Mboat4        | 1.639   | 3.88    | 0.42242268  |
| Spag1         | 1.3875  | 3.285   | 0.422374429 |
| Homer1        | 6.5655  | 15.553  | 0.422137208 |
| Psd3          | 17.87   | 42.3415 | 0.422044566 |
| Mfn1          | 6.7305  | 15.952  | 0.421922016 |
| Aloxe3        | 3.084   | 7.3105  | 0.42185897  |
| C920016K16Rik | 3.128   | 7.417   | 0.421733855 |
| Tpm4          | 6.893   | 16.3525 | 0.421525761 |
| Stk10         | 1.295   | 3.0725  | 0.421480879 |
| Adck1         | 1.679   | 3.984   | 0.421435743 |
| Ikbkb         | 1.7425  | 4.1365  | 0.421249849 |
| Skp2          | 1.199   | 2.8475  | 0.421071115 |
| Samm50        | 10.917  | 25.928  | 0.421050602 |
| Fam199x       | 2.377   | 5.647   | 0.420931468 |
| Gss           | 3.1285  | 7.434   | 0.420836696 |
| Bcar1         | 7.5555  | 17.973  | 0.420380571 |
| Naga          | 3.009   | 7.1595  | 0.420280746 |
| Gm10277       | 1.1435  | 2.724   | 0.419787078 |
| Zkscan4       | 1.1995  | 2.8575  | 0.419772528 |
| Dcdc2c        | 3.5305  | 8.4115  | 0.419722998 |
| Spred1        | 7.515   | 17.908  | 0.419644851 |
| Gm10521       | 1.177   | 2.805   | 0.419607843 |
| Uvrag         | 4.528   | 10.7915 | 0.419589492 |
| Mtmr10        | 1.953   | 4.6555  | 0.419503813 |
| Nfic          | 10.961  | 26.162  | 0.41896644  |
| Stat5b        | 3.5125  | 8.3845  | 0.418927783 |
| Rnd2          | 18.761  | 44.7875 | 0.418889199 |
| 2200002K05Rik | 3.1335  | 7.4845  | 0.418665241 |
| Fam116a       | 6.2105  | 14.8355 | 0.418624246 |
| Sgcz          | 1.116   | 2.666   | 0.418604651 |
| Mtfr1         | 2.1265  | 5.08    | 0.418602362 |
| Ttc39a        | 2.4295  | 5.8075  | 0.418338356 |
| Bbx           | 9.2925  | 22.2175 | 0.418251378 |
| 2610002M06Rik | 7.004   | 16.763  | 0.417824972 |
| Rab34         | 2.109   | 5.049   | 0.417706477 |
| Rbm22         | 4.8785  | 11.68   | 0.417679795 |
| Rnasel        | 31.2725 | 74.9405 | 0.417297723 |
| Akap9         | 12.976  | 31.096  | 0.417288397 |
| Tob2          | 5.709   | 13.6875 | 0.41709589  |
| Pex12         | 2.9095  | 6.976   | 0.417072821 |
| Crtc2         | 2.9085  | 6.975   | 0.416989247 |
| Il18          | 2.46    | 5.8995  | 0.41698449  |
| Fgf1          | 24.051  | 57.7175 | 0.41670204  |
| Cd209c        | 4.582   | 10.998  | 0.416621204 |
| Ubt2          | 3.183   | 7.641   | 0.416568512 |
| Tgfbrap1      | 6.0255  | 14.471  | 0.416384493 |
| Tdrkh         | 2.924   | 7.0225  | 0.416375934 |
| Zfp488        | 14.5035 | 34.838  | 0.416312647 |
| Icmt          | 3.822   | 9.1815  | 0.416271851 |
| Shisa6        | 2.0085  | 4.825   | 0.41626943  |
| Wdr78         | 1.645   | 3.953   | 0.416139641 |

|               |         |          |             |
|---------------|---------|----------|-------------|
| Vps13d        | 3.818   | 9.178    | 0.41599477  |
| Nup35         | 2.007   | 4.825    | 0.415958549 |
| Lin7a         | 11.318  | 27.2195  | 0.415804846 |
| Gpsm1         | 2.686   | 6.46     | 0.415789474 |
| Cnga3         | 1.003   | 2.414    | 0.415492958 |
| Cep70         | 1.435   | 3.4555   | 0.415279988 |
| H2-M3         | 1.3705  | 3.3005   | 0.415240115 |
| Wdr46         | 5.1385  | 12.3805  | 0.415047858 |
| 5031439G07Rik | 8.4075  | 20.28    | 0.414571006 |
| Zfp384        | 5.002   | 12.066   | 0.41455329  |
| Gm16485       | 2.8575  | 6.893    | 0.414550994 |
| Cwc22         | 3.0185  | 7.2815   | 0.414543707 |
| Nfil3         | 2.1985  | 5.309    | 0.414108118 |
| Ipcef1        | 3.1455  | 7.5995   | 0.41390881  |
| Gatad2b       | 43.8125 | 105.8555 | 0.413889689 |
| Cdc40         | 5.866   | 14.1745  | 0.413841758 |
| Gm4925        | 1.3605  | 3.289    | 0.413651566 |
| Diras2        | 25.9795 | 62.81    | 0.413620443 |
| Prima1        | 2.5485  | 6.164    | 0.413449059 |
| Gm6307        | 2.443   | 5.9095   | 0.413402149 |
| Jhdm1d        | 2.369   | 5.7335   | 0.413185663 |
| LOC100504300  | 2.4685  | 5.978    | 0.412930746 |
| Skil          | 8.518   | 20.6335  | 0.412823806 |
| Pemt          | 1.123   | 2.7215   | 0.412640088 |
| Gm2004        | 2.5835  | 6.263    | 0.412501996 |
| Rnd3          | 11.275  | 27.335   | 0.412474849 |
| Irf3          | 2.7875  | 6.758    | 0.412474105 |
| Arap2         | 2.205   | 5.3475   | 0.412342216 |
| Abl2          | 2.4765  | 6.0065   | 0.412303338 |
| Krr1          | 8.241   | 19.993   | 0.412194268 |
| Tmem161a      | 1.3885  | 3.3695   | 0.412078943 |
| Coq10b        | 2.8465  | 6.9085   | 0.41202866  |
| Cep250        | 1.6915  | 4.1055   | 0.412008282 |
| Hipk3         | 8.914   | 21.6395  | 0.411931884 |
| Tubgcp4       | 4.8895  | 11.877   | 0.411678033 |
| Sox2          | 3.5545  | 8.6355   | 0.411614846 |
| LOC100503670  | 18.635  | 45.275   | 0.411595803 |
| Tet2          | 4.9815  | 12.1155  | 0.411167513 |
| Rbm12         | 3.408   | 8.2925   | 0.410973771 |
| Phka1         | 1.36    | 3.3105   | 0.410814076 |
| Pde7a         | 1.212   | 2.9505   | 0.410777834 |
| Cebpg         | 6.8375  | 16.653   | 0.410586681 |
| Prr5          | 11.1335 | 27.1255  | 0.410444047 |
| Zxdc          | 3.643   | 8.88     | 0.410247748 |
| Hip1          | 2.0255  | 4.9375   | 0.410227848 |
| Bms1          | 4.219   | 10.2865  | 0.410149225 |
| LOC100502648  | 1.3195  | 3.218    | 0.41003729  |
| Rnf166        | 8.2575  | 20.142   | 0.409964254 |
| Sypl          | 2.3405  | 5.7115   | 0.409787271 |
| Snx15         | 6.7355  | 16.4375  | 0.409764259 |
| Wnt5a         | 1.0125  | 2.472    | 0.409587379 |
| Lzic          | 3.57    | 8.726    | 0.409122164 |
| Cdh7          | 1.254   | 3.0655   | 0.409068667 |
| Ubr7          | 4.0005  | 9.7805   | 0.409028168 |
| Sltn          | 10.738  | 26.255   | 0.408988764 |

|               |         |         |             |
|---------------|---------|---------|-------------|
| Amotl1        | 13.3385 | 32.625  | 0.408842912 |
| Rb1           | 2.997   | 7.332   | 0.408756137 |
| Kcnk2         | 7.674   | 18.7815 | 0.408593563 |
| Fxyd1         | 6.761   | 16.551  | 0.408494955 |
| Lats1         | 6.845   | 16.762  | 0.408364157 |
| Fosl2         | 1.984   | 4.862   | 0.408062526 |
| Stc1          | 2.1365  | 5.2405  | 0.407690106 |
| Klf7          | 31.2835 | 76.748  | 0.407613228 |
| Cxcr2         | 4.4585  | 10.9395 | 0.407559761 |
| Zbtb33        | 2.129   | 5.225   | 0.407464115 |
| C4b           | 5.275   | 12.949  | 0.407367364 |
| Fam178a       | 10.0805 | 24.753  | 0.407243566 |
| H2-T24        | 5.745   | 14.112  | 0.40710034  |
| Tcp1l12       | 3.0505  | 7.494   | 0.407058981 |
| Hmgb2         | 1.0165  | 2.4985  | 0.406844106 |
| Dido1         | 6.159   | 15.1385 | 0.406843479 |
| Gje1          | 2.017   | 4.9625  | 0.406448363 |
| Xrcc6         | 1.8755  | 4.615   | 0.406392199 |
| Il6st         | 6.755   | 16.6225 | 0.406376899 |
| Safb          | 14.4555 | 35.5725 | 0.406367278 |
| Rbm6          | 3.6495  | 8.9815  | 0.406335245 |
| Slc30a4       | 1.3025  | 3.2075  | 0.406079501 |
| Cxcl14        | 1.876   | 4.622   | 0.405884898 |
| Oprk1         | 1.754   | 4.323   | 0.405736757 |
| Cttnbp2nl     | 4.8185  | 11.8795 | 0.405614714 |
| Myh7          | 1.44    | 3.551   | 0.405519572 |
| Irak1         | 4.297   | 10.597  | 0.40549212  |
| Satb1         | 6.147   | 15.1665 | 0.405301157 |
| Gpld1         | 7.515   | 18.542  | 0.405296085 |
| Lmtk2         | 7.965   | 19.6565 | 0.405209473 |
| Zfp109        | 3.6135  | 8.923   | 0.404964698 |
| Tmem82        | 1.296   | 3.2015  | 0.404810245 |
| Sh3pxd2a      | 1.2545  | 3.101   | 0.40454692  |
| Cntrob        | 1.4055  | 3.4745  | 0.404518636 |
| Ubxn7         | 6.0435  | 14.941  | 0.404490998 |
| Ogfr11        | 11.7765 | 29.127  | 0.404315583 |
| Gpd1          | 2.888   | 7.1435  | 0.404283614 |
| Numb          | 3.1205  | 7.722   | 0.404105154 |
| Zfp790        | 2.9     | 7.1765  | 0.404096705 |
| Skint4        | 3.9715  | 9.8285  | 0.404079972 |
| Slc6a8        | 9.7385  | 24.104  | 0.40402008  |
| Hmgcll1       | 1.5965  | 3.9525  | 0.403921569 |
| Ifi2711       | 22.525  | 55.821  | 0.403521972 |
| Calcoco1      | 14.7185 | 36.4865 | 0.403395777 |
| Dbnnd2        | 10.4655 | 25.9595 | 0.40314721  |
| Creg1         | 5.428   | 13.4745 | 0.402834985 |
| Fezf1         | 3.7715  | 9.368   | 0.402593937 |
| A230103J11Rik | 2.435   | 6.0495  | 0.402512604 |
| Prkaa1        | 7.7315  | 19.2115 | 0.402441246 |
| Mier1         | 2.3375  | 5.8105  | 0.40228896  |
| Tjp1          | 8.7305  | 21.7065 | 0.402206712 |
| H2-T23        | 10.658  | 26.5085 | 0.402059717 |
| Rassf3        | 1.015   | 2.527   | 0.40166205  |
| Rps6ka1       | 1.4845  | 3.7     | 0.401216216 |
| Prr16         | 4.666   | 11.6405 | 0.400841888 |

|               |         |           |             |
|---------------|---------|-----------|-------------|
| Pcdhgc3       | 4.021   | 10.0345   | 0.400717525 |
| Pou3f4        | 1.424   | 3.554     | 0.400675295 |
| Phrf1         | 3.6965  | 9.226     | 0.400661175 |
| Dcbld1        | 1.033   | 2.5785    | 0.400620516 |
| Ap4m1         | 1.6035  | 4.006     | 0.400274588 |
| 9630025I21Rik | 3.1955  | 7.9835    | 0.400263043 |
| Fam102a       | 12.4075 | 31.0005   | 0.40023548  |
| Map4k4        | 7.3575  | 18.3915   | 0.400048936 |
| Akap8         | 7.2985  | 18.27     | 0.399480022 |
| Mobkl1a       | 2.0775  | 5.206     | 0.399058778 |
| Zfp280d       | 8.591   | 21.539    | 0.398857886 |
| Spc24         | 5.4625  | 13.7015   | 0.398678977 |
| Rhoh          | 1.301   | 3.264     | 0.398590686 |
| Arrdc1        | 1.6005  | 4.0175    | 0.398382078 |
| 5430427O19Rik | 1.6555  | 4.157     | 0.398243926 |
| Ick           | 4.216   | 10.589    | 0.398149023 |
| Cmtm4         | 2.5885  | 6.5025    | 0.398077662 |
| 4933403F05Rik | 3.09    | 7.7635    | 0.398016359 |
| Mpp5          | 7.4395  | 18.6995   | 0.397844862 |
| Lrrc16a       | 3.626   | 9.1145    | 0.397827637 |
| Ado           | 3.442   | 8.6545    | 0.397712173 |
| Foxn2         | 1.233   | 3.1035    | 0.397293378 |
| Helz          | 10.9865 | 27.667    | 0.397097625 |
| Sec63         | 3.1025  | 7.8145    | 0.397018363 |
| Mast3         | 13.176  | 33.2      | 0.39686747  |
| Stk11ip       | 1.3305  | 3.353     | 0.396808828 |
| Abhd5         | 2.944   | 7.421     | 0.396712033 |
| Zfp605        | 4.3765  | 11.034    | 0.396637665 |
| Dusp16        | 1.284   | 3.2375    | 0.396602317 |
| Spast         | 5.2785  | 13.311    | 0.396551724 |
| Arrdc3        | 4.8845  | 12.318    | 0.396533528 |
| E130311K13Rik | 5.757   | 14.5195   | 0.396501257 |
| Hif1an        | 1.3905  | 3.5075    | 0.396436208 |
| Atp11a        | 4.6805  | 11.807    | 0.39641738  |
| Fth1          | 521.246 | 1315.8555 | 0.396127082 |
| Lysmd4        | 2.7535  | 6.953     | 0.396016108 |
| Tmx3          | 3.1305  | 7.9065    | 0.395940049 |
| Mapk8         | 8.678   | 21.918    | 0.395930286 |
| Stk4          | 5.3245  | 13.4525   | 0.395800037 |
| Mgea5         | 27.6885 | 69.978    | 0.395674355 |
| Slc6a9        | 4.272   | 10.797    | 0.395665463 |
| Crnk11        | 2.383   | 6.024     | 0.395584329 |
| Fnip1         | 1.788   | 4.523     | 0.395312845 |
| Mapre1        | 7.7555  | 19.6255   | 0.395174645 |
| Prim1         | 1.7725  | 4.4875    | 0.394986072 |
| LOC100502756  | 1.498   | 3.7935    | 0.394885989 |
| Prex2         | 1.7735  | 4.4915    | 0.394856952 |
| Gpc6          | 1.064   | 2.695     | 0.394805195 |
| Rhoc          | 1.266   | 3.2075    | 0.394699922 |
| Rnf20         | 5.024   | 12.7315   | 0.39461179  |
| Invs          | 1.2475  | 3.162     | 0.394528779 |
| Vrk3          | 2.1215  | 5.381     | 0.394257573 |
| Nfib          | 2.5325  | 6.4235    | 0.394255468 |
| Zfyve27       | 2.5155  | 6.3815    | 0.39418632  |
| Cx3cr1        | 1.13    | 2.867     | 0.394140216 |

|               |         |         |             |
|---------------|---------|---------|-------------|
| Cplx2         | 41.752  | 105.933 | 0.394135916 |
| 4933439F18Rik | 8.0185  | 20.3585 | 0.39386497  |
| Kcnq3         | 5.0365  | 12.791  | 0.39375342  |
| Myrip         | 6.9975  | 17.779  | 0.393582316 |
| D11Wsu47e     | 1.736   | 4.415   | 0.393204983 |
| Cdc42ep1      | 2.0605  | 5.2425  | 0.393037673 |
| Topors        | 4.472   | 11.384  | 0.392832045 |
| Pdia4         | 4.2065  | 10.7165 | 0.392525545 |
| Usp31         | 12.645  | 32.2205 | 0.39245201  |
| Fam82b        | 1.1555  | 2.9445  | 0.392426558 |
| Med20         | 6.493   | 16.5545 | 0.392219638 |
| Prkaa2        | 4.599   | 11.731  | 0.392038189 |
| Pip4k2a       | 30.2855 | 77.262  | 0.391984417 |
| Hdac4         | 5.4225  | 13.834  | 0.391969062 |
| 5930434B04Rik | 8.0935  | 20.6515 | 0.391908578 |
| Mvk           | 2.0475  | 5.226   | 0.391791045 |
| 2700089E24Rik | 37.04   | 94.5845 | 0.391607504 |
| Pcmd2         | 4.5225  | 11.556  | 0.39135514  |
| Cd300a        | 3.168   | 8.095   | 0.391352687 |
| St3gal2       | 4.7625  | 12.172  | 0.391266842 |
| Ripply3       | 2.0245  | 5.1755  | 0.391169935 |
| Zfp800        | 4.3315  | 11.074  | 0.391141412 |
| Usp40         | 1.8355  | 4.693   | 0.391114426 |
| Lgtn          | 2.2875  | 5.8505  | 0.390992223 |
| Lrrc58        | 20.334  | 52.0155 | 0.390921937 |
| Tmem47        | 29.734  | 76.0655 | 0.390899948 |
| LOC100502781  | 14.436  | 36.9335 | 0.390864662 |
| Nkd2          | 1.218   | 3.1165  | 0.390823039 |
| Tcf20         | 30.36   | 77.688  | 0.390793945 |
| Gm10765       | 1.553   | 3.975   | 0.390691824 |
| Gigyf2        | 8.4675  | 21.6805 | 0.390558336 |
| Cgn           | 1.1545  | 2.9625  | 0.389704641 |
| Rbms1         | 3.3935  | 8.709   | 0.389654381 |
| Man2a2        | 1.05    | 2.6955  | 0.389538119 |
| Frmf5         | 5.728   | 14.7085 | 0.389434681 |
| Nav2          | 5.102   | 13.118  | 0.38893124  |
| Arl6ip6       | 1.512   | 3.889   | 0.388788892 |
| E030030I06Rik | 4.0955  | 10.5415 | 0.388512071 |
| Birc5         | 2.521   | 6.4895  | 0.388473688 |
| Ercc6         | 2.522   | 6.4925  | 0.388448209 |
| Inf2          | 2.821   | 7.263   | 0.388406994 |
| Nt5c1a        | 1.47    | 3.785   | 0.388375165 |
| Zscan22       | 3.6335  | 9.3565  | 0.388339657 |
| Trim65        | 1.356   | 3.494   | 0.388093875 |
| Lrrc45        | 2.4735  | 6.374   | 0.388060872 |
| Ankrd28       | 3.7275  | 9.607   | 0.387998335 |
| Mxd1          | 3.198   | 8.243   | 0.387965547 |
| Rg9mtd2       | 2.227   | 5.742   | 0.387843957 |
| Zfp423        | 9.4535  | 24.3985 | 0.387462344 |
| Acad8         | 1.72    | 4.447   | 0.386777603 |
| Tbc1d12       | 1.375   | 3.559   | 0.386344479 |
| Ptpn12        | 5.728   | 14.8285 | 0.386283171 |
| Fhod3         | 2.2135  | 5.7315  | 0.386199075 |
| Ccdc55        | 18.2395 | 47.2305 | 0.38618054  |
| 0610030E20Rik | 1.2875  | 3.335   | 0.386056972 |

|              |         |          |             |
|--------------|---------|----------|-------------|
| Eif2c3       | 3.276   | 8.4945   | 0.38566131  |
| Acer1        | 1.0125  | 2.628    | 0.385273973 |
| Fbxw9        | 1.236   | 3.209    | 0.385166719 |
| Eef2k        | 1.6225  | 4.214    | 0.385026103 |
| Ccdc19       | 1.385   | 3.5985   | 0.38488259  |
| Erich1       | 5.988   | 15.5695  | 0.384598092 |
| Smurf2       | 7.5355  | 19.5975  | 0.384513331 |
| Sh2d5        | 4.732   | 12.3065  | 0.38451225  |
| Zeb1         | 18.2465 | 47.489   | 0.384225821 |
| Atp9b        | 1.975   | 5.15     | 0.383495146 |
| Samd8        | 4.4085  | 11.499   | 0.383381164 |
| Wsb1         | 7.1195  | 18.5705  | 0.383376861 |
| Syt15        | 1.1295  | 2.9465   | 0.383336162 |
| Gm9924       | 1.2345  | 3.2215   | 0.383206581 |
| Elmod3       | 1.8685  | 4.878    | 0.38304633  |
| Ncoa2        | 11.649  | 30.4245  | 0.382882217 |
| Gm1968       | 1.3405  | 3.503    | 0.382671995 |
| Trove2       | 5.9845  | 15.6425  | 0.382579511 |
| Tgfb2        | 1.685   | 4.4065   | 0.382389652 |
| Gm5113       | 6.479   | 16.9525  | 0.382185518 |
| Alkbh8       | 6.8965  | 18.046   | 0.382162252 |
| Crat         | 3.357   | 8.785    | 0.382128628 |
| Ubxn2a       | 27.115  | 70.971   | 0.38205746  |
| Gfod1        | 4.248   | 11.124   | 0.381877023 |
| Cdh20        | 2.696   | 7.06     | 0.381869688 |
| Ntrk2        | 26.46   | 69.2965  | 0.381837467 |
| Rsph4a       | 2.0535  | 5.3795   | 0.381726926 |
| Sass6        | 1.7635  | 4.623    | 0.381462254 |
| Prkrir       | 3.795   | 9.95     | 0.381407035 |
| Smad7        | 3.6835  | 9.6595   | 0.381334438 |
| Ankhd1       | 3.428   | 8.9915   | 0.381248957 |
| Rtn4         | 46.4995 | 121.9925 | 0.381166875 |
| Ypel2        | 8.72    | 22.879   | 0.381135539 |
| Arpp21       | 7.621   | 19.9985  | 0.381078581 |
| Car5b        | 1.661   | 4.3595   | 0.381006996 |
| Plin2        | 1.4085  | 3.699    | 0.380778589 |
| Lrch3        | 4.1175  | 10.8175  | 0.380633233 |
| Fam20b       | 7.1865  | 18.881   | 0.38062073  |
| LOC100502599 | 1.021   | 2.6825   | 0.380615098 |
| Isy1         | 8.6685  | 22.7785  | 0.380556226 |
| Zbtb7a       | 34.624  | 90.992   | 0.380516969 |
| Slc22a15     | 1.45    | 3.811    | 0.380477565 |
| Cml1         | 1.999   | 5.2565   | 0.380291068 |
| Rpap1        | 1.001   | 2.634    | 0.380030372 |
| Yeats2       | 3.2555  | 8.5675   | 0.379982492 |
| Slk          | 6.7535  | 17.7875  | 0.379676739 |
| LOC100503989 | 8.414   | 22.1675  | 0.379564678 |
| Lix1l        | 5.002   | 13.179   | 0.379543213 |
| Cr1l         | 1.856   | 4.893    | 0.379317392 |
| Gm9931       | 4.4845  | 11.8255  | 0.379222866 |
| Wwc2         | 1.573   | 4.1515   | 0.378899193 |
| Id2          | 7.1125  | 18.773   | 0.378868588 |
| Wipf3        | 9.724   | 25.6755  | 0.378726802 |
| Ing1         | 5.3145  | 14.0375  | 0.378593054 |
| Cdc42ep2     | 3.609   | 9.536    | 0.37846057  |

|               |         |         |             |
|---------------|---------|---------|-------------|
| Il17ra        | 1.567   | 4.1415  | 0.378365327 |
| Ap1ar         | 26.214  | 69.321  | 0.378153806 |
| Tmie          | 10.868  | 28.782  | 0.377597109 |
| Nebl          | 3.3275  | 8.8125  | 0.377588652 |
| Megf9         | 4.102   | 10.866  | 0.377507823 |
| Itsn1         | 12.892  | 34.155  | 0.377455717 |
| 1810012P15Rik | 9.3305  | 24.725  | 0.377371082 |
| Abcd2         | 1.305   | 3.459   | 0.37727667  |
| 2810021J22Rik | 1.629   | 4.3185  | 0.377214311 |
| Rcor3         | 5.5105  | 14.61   | 0.377173169 |
| 4932411E22Rik | 2.9795  | 7.9005  | 0.37712803  |
| Leng8         | 9.608   | 25.4815 | 0.377057866 |
| Nfkb1         | 1.649   | 4.3745  | 0.376957367 |
| Hipk2         | 21.9235 | 58.177  | 0.376841363 |
| Ficd          | 1.4415  | 3.8255  | 0.376813488 |
| Phf14         | 3.182   | 8.4525  | 0.37645667  |
| Lcor          | 1.717   | 4.5625  | 0.376328767 |
| Cdkn2aip      | 1.617   | 4.297   | 0.376309053 |
| Zfp553        | 5.4215  | 14.409  | 0.376257894 |
| Tab2          | 13.7505 | 36.548  | 0.376231258 |
| Gcc2          | 5.6905  | 15.126  | 0.376206532 |
| Ntn1          | 1.0055  | 2.673   | 0.376169098 |
| Slain1        | 14.7975 | 39.3385 | 0.376158217 |
| Actn1         | 1.1705  | 3.113   | 0.376003855 |
| Bach1         | 1.031   | 2.743   | 0.37586584  |
| Pik3ip1       | 5.1795  | 13.781  | 0.375843553 |
| Gm9964        | 2.673   | 7.1125  | 0.375817223 |
| Tcp1111       | 6.608   | 17.604  | 0.375369234 |
| Car8          | 1.541   | 4.107   | 0.375213051 |
| Plekha3       | 4.5375  | 12.096  | 0.375124008 |
| Tox3          | 6.6345  | 17.69   | 0.375042397 |
| Kif17         | 1.808   | 4.823   | 0.374870413 |
| LOC100504645  | 1.9105  | 5.1005  | 0.37457112  |
| Lbh           | 17.7    | 47.2565 | 0.374551649 |
| 4921513D23Rik | 26.5055 | 70.828  | 0.374223471 |
| Tbkbp1        | 1.87    | 4.999   | 0.374074815 |
| Tmed5         | 3.4485  | 9.219   | 0.374064432 |
| LOC100504004  | 54.65   | 146.101 | 0.374056304 |
| Tdg           | 1.3765  | 3.6835  | 0.373693498 |
| Lnp           | 4.4915  | 12.034  | 0.37323417  |
| Zfp40         | 1.3975  | 3.7495  | 0.372716362 |
| Rnf141        | 5.0165  | 13.464  | 0.372586156 |
| Ankrd43       | 6.418   | 17.23   | 0.372489843 |
| Gm1043        | 1.3555  | 3.6415  | 0.372236716 |
| Itga4         | 1.5725  | 4.226   | 0.372101278 |
| Abl1          | 2.241   | 6.0265  | 0.371857629 |
| Ryr3          | 1.163   | 3.13    | 0.371565495 |
| Arhgap5       | 7.7905  | 20.972  | 0.371471486 |
| Snpc3         | 5.117   | 13.7775 | 0.371402649 |
| B4galt4       | 1.9485  | 5.2475  | 0.371319676 |
| Gm2a          | 5.187   | 13.9695 | 0.371308923 |
| 2310010M20Rik | 3.283   | 8.8435  | 0.371233109 |
| LOC100503081  | 4.748   | 12.7915 | 0.371183989 |
| 6330578E17Rik | 19.938  | 53.739  | 0.371015464 |
| Rnf13         | 9.979   | 26.908  | 0.370856251 |



|               |         |         |             |
|---------------|---------|---------|-------------|
| Fads1         | 9.1345  | 24.677  | 0.370162499 |
| Ubash3b       | 6.963   | 18.8235 | 0.369909953 |
| Rassf1        | 2.1035  | 5.6925  | 0.3695213   |
| Stx3          | 3.182   | 8.614   | 0.369398653 |
| Gpr107        | 1.985   | 5.3745  | 0.369336682 |
| Socs4         | 1.2625  | 3.4185  | 0.369314027 |
| Fgf11         | 1.569   | 4.249   | 0.369263356 |
| 1110020G09Rik | 2.5205  | 6.8265  | 0.369222881 |
| Spry4         | 3.78    | 10.2405 | 0.369122601 |
| Unc13c        | 5.085   | 13.776  | 0.369120209 |
| Ppargc1b      | 2.1625  | 5.8655  | 0.368681272 |
| Sgk1          | 14.3465 | 38.9135 | 0.36867668  |
| Ipp           | 1.1935  | 3.2375  | 0.368648649 |
| Cd84          | 1.98    | 5.371   | 0.368646435 |
| Nrip1         | 5.545   | 15.0455 | 0.368548736 |
| Pde4c         | 1.2725  | 3.454   | 0.368413434 |
| Epn2          | 9.796   | 26.593  | 0.368367616 |
| Zfp346        | 3.907   | 10.61   | 0.368237512 |
| Hus1          | 1.5205  | 4.1305  | 0.36811524  |
| St8sia2       | 2.205   | 5.9905  | 0.368082798 |
| Amacr         | 1.457   | 3.9605  | 0.367882843 |
| Syt14         | 1.1145  | 3.03    | 0.367821782 |
| Lrp6          | 1.85    | 5.0315  | 0.367683593 |
| Cnst          | 4.062   | 11.0515 | 0.367551916 |
| Dnajc28       | 2.2835  | 6.213   | 0.367535812 |
| Cep135        | 1.04    | 2.83    | 0.367491166 |
| Sdf4          | 25.2535 | 68.7325 | 0.367417161 |
| Frs2          | 9.1625  | 24.947  | 0.367278631 |
| Lcorl         | 2.8445  | 7.7465  | 0.367198089 |
| Dlg1          | 10.115  | 27.5615 | 0.366997442 |
| Lsm11         | 2.7645  | 7.535   | 0.366887857 |
| Hnrnpd        | 17.5245 | 47.7775 | 0.366793993 |
| Rab2b         | 11.2425 | 30.66   | 0.366682975 |
| Dyrk2         | 2.0775  | 5.6665  | 0.36662843  |
| Rnf149        | 6.626   | 18.0825 | 0.366431633 |
| Dnalc1        | 10.6115 | 28.9815 | 0.36614737  |
| Smad5         | 4.4485  | 12.1495 | 0.366146755 |
| Akr1b10       | 5.603   | 15.31   | 0.365969954 |
| Insig1        | 8.6665  | 23.6835 | 0.365929867 |
| Prkcq         | 2.0395  | 5.577   | 0.365698404 |
| St6gal1       | 1.241   | 3.3945  | 0.365591398 |
| 3110035E14Rik | 3.111   | 8.51    | 0.365569918 |
| Chkb          | 3.578   | 9.7885  | 0.36553098  |
| Sarm1         | 2.8065  | 7.679   | 0.365477276 |
| Gm3897        | 2.1435  | 5.8655  | 0.365441991 |
| Tfdp1         | 7.682   | 21.0235 | 0.365400623 |
| Eml6          | 1.84    | 5.039   | 0.365151816 |
| Eea1          | 6.4735  | 17.729  | 0.365136217 |
| Sh3kbp1       | 15.548  | 42.5995 | 0.36498081  |
| H2-T22        | 2.35    | 6.439   | 0.364963504 |
| Adam19        | 2.1705  | 5.9475  | 0.364943253 |
| Ap4e1         | 1.0485  | 2.874   | 0.364822547 |
| Kenn2         | 2.911   | 7.9825  | 0.364672722 |
| Mettl7a1      | 6.739   | 18.4825 | 0.364615177 |
| F630043A04Rik | 1.1755  | 3.224   | 0.364609181 |

|               |         |          |             |
|---------------|---------|----------|-------------|
| Srsf1         | 6.4215  | 17.617   | 0.364505875 |
| Man1a2        | 4.3515  | 11.9415  | 0.364401457 |
| Zdhhc21       | 4.2025  | 11.5335  | 0.364373347 |
| A230006K03Rik | 4.5915  | 12.604   | 0.364289115 |
| Rft1          | 2.1135  | 5.802    | 0.364270941 |
| Tsr1          | 6.3635  | 17.475   | 0.364148784 |
| Scd1          | 7.0095  | 19.253   | 0.364073131 |
| Itgb8         | 1.6375  | 4.5015   | 0.363767633 |
| Gdpd2         | 1.1655  | 3.204    | 0.363764045 |
| Stat3         | 7.699   | 21.167   | 0.363726555 |
| Ptpdc1        | 9.522   | 26.206   | 0.363351904 |
| Glt25d1       | 1.7645  | 4.8615   | 0.362953821 |
| Nfatc3        | 2.7195  | 7.5015   | 0.362527495 |
| Sun2          | 3.9225  | 10.821   | 0.362489604 |
| Gtf2a1        | 8.183   | 22.588   | 0.362272003 |
| LOC100504647  | 18.8235 | 51.9665  | 0.36222374  |
| Ids           | 59.845  | 165.217  | 0.362220595 |
| Elov15        | 7.4405  | 20.5415  | 0.362217949 |
| Kdm6a         | 2.4345  | 6.7215   | 0.362195938 |
| Gpr108        | 2.913   | 8.044    | 0.362133267 |
| Slc25a23      | 79.101  | 218.525  | 0.361976891 |
| Neur13        | 2.66    | 7.3525   | 0.361781707 |
| Zfp532        | 8.1105  | 22.42    | 0.361752899 |
| Npat          | 2.7135  | 7.505    | 0.361558961 |
| Irgm1         | 5.9295  | 16.403   | 0.361488752 |
| Etv1          | 6.153   | 17.054   | 0.360795121 |
| Slc12a6       | 6.901   | 19.1355  | 0.360638604 |
| Gpc5          | 1.7935  | 4.9735   | 0.36061124  |
| Paqr8         | 3.2465  | 9.003    | 0.360602022 |
| Ppm1k         | 7.8415  | 21.7675  | 0.360238888 |
| Rad5113       | 2.755   | 7.6505   | 0.360107183 |
| Mtap2         | 40.3475 | 112.0695 | 0.360022129 |
| Wnk1          | 14.324  | 39.846   | 0.359484013 |
| Yipf2         | 6.1175  | 17.027   | 0.359282316 |
| Ccdc30        | 2.1535  | 5.9985   | 0.359006418 |
| L3mbtl        | 1.089   | 3.0355   | 0.358754736 |
| Ints5         | 2.216   | 6.185    | 0.358286176 |
| Zfp446        | 1.1425  | 3.19     | 0.35815047  |
| Zfp263        | 2.345   | 6.55     | 0.358015267 |
| Ttbk2         | 15.228  | 42.5415  | 0.357956349 |
| Samhd1        | 3.9365  | 11.0015  | 0.357814843 |
| 4930402H24Rik | 6.8995  | 19.284   | 0.357783655 |
| Degs2         | 4.8485  | 13.5585  | 0.357598554 |
| Fbxl19        | 3.934   | 11.0015  | 0.357587602 |
| Dcaf5         | 15.931  | 44.5545  | 0.357562087 |
| Gm6958        | 1.6205  | 4.533    | 0.357489521 |
| Gm10687       | 1.221   | 3.4155   | 0.357487923 |
| Slc30a7       | 1.0935  | 3.0595   | 0.357411342 |
| Scd3          | 3.642   | 10.19    | 0.357409225 |
| Trafd1        | 8.2095  | 22.9835  | 0.357191028 |
| Mapk6         | 26.823  | 75.221   | 0.35658925  |
| Stxbp4        | 7.8525  | 22.035   | 0.356364874 |
| Zbtb44        | 4.322   | 12.129   | 0.356336054 |
| Rab11fip4     | 10.3015 | 28.9115  | 0.356311502 |
| Whsc1         | 7.067   | 19.8405  | 0.35619062  |

|               |         |          |             |
|---------------|---------|----------|-------------|
| Scyl3         | 1.6465  | 4.623    | 0.356154013 |
| Sfxn5         | 7.313   | 20.5585  | 0.355716614 |
| Oxsr1         | 2.992   | 8.4175   | 0.355449955 |
| Ccbl1         | 2.006   | 5.6495   | 0.35507567  |
| Blzf1         | 1.7625  | 4.965    | 0.354984894 |
| Myo6          | 2.5555  | 7.205    | 0.354684247 |
| Zgpat         | 1.116   | 3.149    | 0.354398222 |
| Sp3           | 3.416   | 9.6525   | 0.353897954 |
| Efcab2        | 1.5635  | 4.4205   | 0.353693021 |
| Adcy6         | 1.6875  | 4.7725   | 0.353588266 |
| Gprc5b        | 4.1505  | 11.7435  | 0.353429557 |
| Dnajc3        | 3.95    | 11.1795  | 0.353325283 |
| Ift81         | 5.8145  | 16.462   | 0.353207387 |
| Cln8          | 1.66    | 4.703    | 0.352966192 |
| Pnn           | 12.473  | 35.349   | 0.35285298  |
| Mcl1          | 10.1595 | 28.8405  | 0.352265044 |
| Slc41a1       | 5.4335  | 15.4255  | 0.352241418 |
| Klf13         | 8.496   | 24.1405  | 0.351939686 |
| LOC100503528  | 1.487   | 4.2255   | 0.351911016 |
| Plagl1        | 4.997   | 14.2     | 0.351901408 |
| 2310045N01Rik | 9.81    | 27.8835  | 0.351820969 |
| Rcctb2        | 1.4325  | 4.072    | 0.351792731 |
| Plxnb1        | 1.845   | 5.2475   | 0.351595998 |
| Rap2c         | 5.0655  | 14.4075  | 0.351587715 |
| Dnajb14       | 3.7685  | 10.734   | 0.351080678 |
| D330012F22Rik | 2.738   | 7.8015   | 0.350958149 |
| Sp4           | 3.7855  | 10.7925  | 0.350752838 |
| Eil2          | 3.9915  | 11.389   | 0.350469752 |
| Neu3          | 1.916   | 5.469    | 0.35033827  |
| Morn4         | 28.059  | 80.1285  | 0.350175031 |
| Hinfp         | 1.276   | 3.644    | 0.350164654 |
| Chd3          | 24.2255 | 69.2965  | 0.349591971 |
| 2810408P10Rik | 3.088   | 8.8355   | 0.349499179 |
| Pppde2        | 13.708  | 39.2415  | 0.349324057 |
| Elk4          | 4.039   | 11.5665  | 0.349198115 |
| LOC100502582  | 2.5985  | 7.446    | 0.348979318 |
| Pdk1          | 2.513   | 7.201    | 0.348979308 |
| Plekha7       | 1.2975  | 3.719    | 0.348884109 |
| LOC100503441  | 3.2735  | 9.3835   | 0.348857036 |
| Fam149a       | 4.232   | 12.132   | 0.348829542 |
| Smek2         | 3.076   | 8.819    | 0.34879238  |
| Ddx26b        | 1.0545  | 3.0235   | 0.348767984 |
| Itsn2         | 3.0595  | 8.7805   | 0.348442572 |
| Palmd         | 1.691   | 4.8585   | 0.34804981  |
| Id4           | 5.749   | 16.5275  | 0.347844502 |
| Ndrp1         | 12.747  | 36.68    | 0.347519084 |
| Ctnna1        | 6.3045  | 18.1795  | 0.346791716 |
| Tox           | 14.3445 | 41.375   | 0.346694864 |
| Irgm2         | 8.1965  | 23.6515  | 0.346553073 |
| Pura          | 72.1595 | 208.2525 | 0.346500042 |
| Tmem163       | 7.3065  | 21.1055  | 0.346189382 |
| Dpf3          | 1.1355  | 3.2835   | 0.345820009 |
| Erlin2        | 7.158   | 20.7015  | 0.345772046 |
| Kctd9         | 3.6015  | 10.423   | 0.345533915 |
| Tmod2         | 46.009  | 133.23   | 0.345335135 |

|               |         |         |             |
|---------------|---------|---------|-------------|
| St6galnac6    | 10.945  | 31.701  | 0.345257247 |
| Cnot6l        | 2.6185  | 7.587   | 0.345129827 |
| Map3k13       | 2.444   | 7.0815  | 0.34512462  |
| Cwc25         | 2.329   | 6.7515  | 0.344960379 |
| Tmem42        | 2.4375  | 7.0685  | 0.344839782 |
| Rab8b         | 6.929   | 20.0975 | 0.34476925  |
| Clcc1         | 2.577   | 7.4775  | 0.344633902 |
| Smurf1        | 3.572   | 10.375  | 0.344289157 |
| Igfbp5        | 9.3505  | 27.1795 | 0.344027668 |
| Gm10191       | 28.7515 | 83.5825 | 0.343989471 |
| Ccdc88a       | 5.167   | 15.0275 | 0.3438363   |
| Bnip2         | 4.201   | 12.2195 | 0.343794754 |
| Usp49         | 2.1085  | 6.139   | 0.343459847 |
| Mdga1         | 2.3675  | 6.8965  | 0.343290075 |
| Hbp1          | 5.4485  | 15.8735 | 0.343245031 |
| Lrrc20        | 4.766   | 13.9185 | 0.342421956 |
| Lmf2          | 1.362   | 3.9795  | 0.342254052 |
| Ncoa3         | 2.2655  | 6.621   | 0.342168857 |
| Bbs9          | 7.0845  | 20.709  | 0.342097639 |
| Mpz11         | 1.44    | 4.2105  | 0.342002138 |
| Pcdhga2       | 1.6445  | 4.8085  | 0.341998544 |
| Gpr62         | 1.3245  | 3.8735  | 0.341938815 |
| Mll2          | 5.9455  | 17.3965 | 0.341764148 |
| Naaa          | 1.7635  | 5.16    | 0.341763566 |
| Nr2c2         | 9.6965  | 28.375  | 0.341726872 |
| Bbs1          | 5.379   | 15.7425 | 0.341686517 |
| Ppp1r3c       | 2.4055  | 7.042   | 0.341593297 |
| Eif3j         | 4.9015  | 14.3565 | 0.341413297 |
| Purg          | 3.2085  | 9.398   | 0.341402426 |
| Tigit         | 6.0125  | 17.6225 | 0.341183147 |
| Fezf2         | 2.79    | 8.191   | 0.340617751 |
| Trps1         | 1.101   | 3.238   | 0.340024707 |
| Fgf9          | 3.255   | 9.5795  | 0.339788089 |
| Pard6b        | 2.1625  | 6.3645  | 0.339775316 |
| Gdf3          | 1.189   | 3.4995  | 0.339762823 |
| Cacng4        | 3.1255  | 9.2005  | 0.339709798 |
| Ak3           | 9.053   | 26.6545 | 0.339642462 |
| Bet11         | 3.355   | 9.88    | 0.339574899 |
| Gm5803        | 1.1175  | 3.291   | 0.339562443 |
| Mycl1         | 1.3325  | 3.926   | 0.339403974 |
| Ncf1          | 2.6715  | 7.8755  | 0.339216558 |
| Nek1          | 2.812   | 8.291   | 0.339162948 |
| Snta1         | 1.8825  | 5.553   | 0.339005943 |
| LOC100503589  | 21.2435 | 62.67   | 0.338973991 |
| Tshz1         | 2.6975  | 7.9615  | 0.338818062 |
| Tmod1         | 6.455   | 19.053  | 0.338791791 |
| Pls1          | 1.825   | 5.3875  | 0.3387471   |
| D3Ertd751e    | 2.1025  | 6.208   | 0.338675902 |
| Akap13        | 1.475   | 4.356   | 0.338613407 |
| Fmn12         | 4.5365  | 13.408  | 0.33834278  |
| Rhoq          | 2.076   | 6.1415  | 0.338028169 |
| 1700017B05Rik | 1.3705  | 4.0555  | 0.337936136 |
| 1600027N09Rik | 1.001   | 2.9625  | 0.337890295 |
| Acox3         | 1.507   | 4.4625  | 0.337703081 |
| Rabgap11      | 13.2885 | 39.3905 | 0.337352915 |

|               |         |         |             |
|---------------|---------|---------|-------------|
| Slc12a2       | 2.644   | 7.839   | 0.337287919 |
| BC030336      | 6.3075  | 18.711  | 0.33710117  |
| Msi2          | 26.1295 | 77.539  | 0.336985259 |
| Pdlim5        | 2.549   | 7.5655  | 0.336924195 |
| Gm2036        | 5.1785  | 15.3715 | 0.336889698 |
| Zfp809        | 3.333   | 9.894   | 0.336870831 |
| Fam123c       | 2.1645  | 6.428   | 0.336729932 |
| Atad2b        | 1.3795  | 4.098   | 0.336627623 |
| Bend3         | 1.0365  | 3.0805  | 0.336471352 |
| 4930442E04Rik | 1.2255  | 3.643   | 0.336398573 |
| Zfp329        | 2.3525  | 6.9995  | 0.336095435 |
| Cbln3         | 1.245   | 3.7045  | 0.336077743 |
| Rnf38         | 13.6345 | 40.574  | 0.336040321 |
| Fam63b        | 3.6975  | 11.008  | 0.335892078 |
| Akap10        | 1.737   | 5.1735  | 0.335749493 |
| Rtkn          | 3.9695  | 11.846  | 0.335092014 |
| Zbtb6         | 2.3035  | 6.8795  | 0.33483538  |
| Hmgxb4        | 6.557   | 19.6025 | 0.334498151 |
| Slc35a3       | 1.349   | 4.0355  | 0.334283236 |
| Palm3         | 1.038   | 3.106   | 0.334191887 |
| Gltp          | 11.6915 | 34.988  | 0.334157425 |
| Chic1         | 7.096   | 21.2475 | 0.333968702 |
| Grip1         | 2.4655  | 7.3825  | 0.333965459 |
| BC016495      | 4.6115  | 13.8285 | 0.333477962 |
| Rbms3         | 6.872   | 20.6325 | 0.333066764 |
| Mid1ip1       | 16.5775 | 49.7885 | 0.332958414 |
| Mri1          | 1.1205  | 3.3685  | 0.332640641 |
| Vezf1         | 12.772  | 38.419  | 0.332439678 |
| Mphosph10     | 3.677   | 11.0615 | 0.33241423  |
| Mms19         | 1.1115  | 3.344   | 0.332386364 |
| Aptx          | 2.446   | 7.361   | 0.332291808 |
| Impad1        | 7.405   | 22.286  | 0.332271381 |
| Atf5          | 1.5115  | 4.5505  | 0.332161301 |
| 4930431F12Rik | 3.1495  | 9.487   | 0.331980605 |
| Sp110         | 1.747   | 5.2625  | 0.331971496 |
| Yod1          | 1.0615  | 3.1985  | 0.331874316 |
| Trmu          | 2.951   | 8.892   | 0.331871345 |
| Zcchc7        | 4.1835  | 12.61   | 0.331760508 |
| Mettl4        | 1.3225  | 3.989   | 0.331536726 |
| I830012O16Rik | 5.324   | 16.0675 | 0.331352108 |
| Polg          | 1.0965  | 3.3105  | 0.331218849 |
| Clk1          | 3.649   | 11.02   | 0.331125227 |
| Mpp7          | 1.0855  | 3.28    | 0.330945122 |
| Mapkbp1       | 3.178   | 9.6035  | 0.330921018 |
| Txlng         | 2.056   | 6.2135  | 0.330892412 |
| Mobkl2c       | 3.3625  | 10.163  | 0.33085703  |
| Epb4.114b     | 2.752   | 8.34    | 0.329976019 |
| Slc35e2       | 4.553   | 13.798  | 0.329975359 |
| Apobec3       | 1.227   | 3.7185  | 0.329971763 |
| Shisa4        | 13.9515 | 42.2855 | 0.329935794 |
| Phc1          | 7.8145  | 23.731  | 0.329295015 |
| Slc27a1       | 5.7205  | 17.3735 | 0.329265836 |
| Zfp106        | 25.088  | 76.224  | 0.329135181 |
| Msto1         | 2.446   | 7.433   | 0.329073053 |
| Zfp715        | 1.35    | 4.1035  | 0.32898745  |

|                |         |         |             |
|----------------|---------|---------|-------------|
| Ccdc112        | 1.896   | 5.7645  | 0.328909706 |
| Gm10091        | 3.638   | 11.063  | 0.328843894 |
| Mettl9         | 4.5085  | 13.7195 | 0.328619848 |
| Inpp5k         | 2.565   | 7.8115  | 0.32836203  |
| Fech           | 8.1505  | 24.8265 | 0.328298391 |
| Nr3c2          | 2.3685  | 7.222   | 0.327956245 |
| Lime1          | 1.765   | 5.383   | 0.32788408  |
| Tsc22d3        | 10.406  | 31.7555 | 0.327691266 |
| Zc3h12c        | 4.228   | 12.9175 | 0.327307916 |
| Edem3          | 4.1915  | 12.814  | 0.327103168 |
| Agpat5         | 2.2175  | 6.78    | 0.327064897 |
| Smc5           | 1.5275  | 4.6755  | 0.326703026 |
| Ano6           | 1.176   | 3.6025  | 0.326439972 |
| Mdm4           | 4.545   | 13.932  | 0.32622739  |
| Pex13          | 5.4815  | 16.817  | 0.325949932 |
| Slc4a1ap       | 6.406   | 19.689  | 0.325359338 |
| Klf6           | 5.507   | 16.9355 | 0.325174928 |
| Cnot7          | 2.6295  | 8.09    | 0.325030902 |
| Atf7ip         | 10.9815 | 33.7965 | 0.324930096 |
| Ercc8          | 1.073   | 3.3045  | 0.324708731 |
| F530104D19Rik  | 1.2335  | 3.8005  | 0.324562558 |
| Lrrc33         | 1.247   | 3.8475  | 0.324106563 |
| 2700081O15Rik  | 2.3355  | 7.2145  | 0.323723058 |
| Vtn            | 1.234   | 3.8135  | 0.323587256 |
| Fam107b        | 1.077   | 3.329   | 0.323520577 |
| Zbtb34         | 3.08    | 9.5265  | 0.323308665 |
| Gm6718         | 2.538   | 7.854   | 0.323147441 |
| 9930111J21Rik1 | 4.732   | 14.6525 | 0.322948302 |
| Zfp866         | 2.139   | 6.6315  | 0.322551459 |
| Rasl11b        | 1.3765  | 4.2705  | 0.322327596 |
| Bcl2           | 5.279   | 16.3805 | 0.322273435 |
| Mex3d          | 1.8305  | 5.6825  | 0.322129344 |
| Zfp330         | 7.0615  | 21.937  | 0.321899075 |
| Aldh9a1        | 6.4425  | 20.016  | 0.321867506 |
| Pdcl           | 1.4065  | 4.3735  | 0.321595976 |
| Gprin1         | 2.2275  | 6.9325  | 0.321312658 |
| Rorb           | 3.374   | 10.507  | 0.321119254 |
| Ppil4          | 3.853   | 12.006  | 0.320922872 |
| Alg8           | 1.981   | 6.179   | 0.320602039 |
| Trpc1          | 1.3035  | 4.0665  | 0.320545924 |
| LOC100503043   | 5.3805  | 16.806  | 0.320153517 |
| Orai1          | 1.144   | 3.5785  | 0.31968702  |
| Irgq           | 17.03   | 53.2835 | 0.319611137 |
| LOC100504672   | 1.0515  | 3.292   | 0.319410693 |
| Ndufaf1        | 3.5515  | 11.125  | 0.319235955 |
| Cnnm3          | 2.5395  | 7.959   | 0.319072748 |
| Ttyh1          | 13.146  | 41.207  | 0.319023467 |
| Nucb2          | 3.477   | 10.9035 | 0.31888843  |
| Vps54          | 2.7985  | 8.7855  | 0.318536224 |
| Usp2           | 4.1115  | 12.916  | 0.318326107 |
| Wdr73          | 4.35    | 13.6855 | 0.317854664 |
| Pigz           | 1.878   | 5.9155  | 0.317471051 |
| Spata9         | 3.6205  | 11.424  | 0.316920518 |
| Ddx39          | 1.5175  | 4.7905  | 0.316772779 |
| Slfn5          | 1.7165  | 5.419   | 0.316755859 |

|               |         |         |             |
|---------------|---------|---------|-------------|
| Dhrs4         | 1.3945  | 4.405   | 0.316572077 |
| Tmem170b      | 5.2435  | 16.57   | 0.316445383 |
| Cdkn1b        | 4.003   | 12.654  | 0.316342658 |
| Epm2a         | 5.1315  | 16.2475 | 0.315833205 |
| Slc4a4        | 4.946   | 15.669  | 0.315655115 |
| 5830477G23Rik | 2.0985  | 6.653   | 0.315421614 |
| Zfp644        | 10.6575 | 33.8485 | 0.314858856 |
| Tnfaip8l3     | 2.351   | 7.4695  | 0.314746636 |
| Gabpa         | 2.94    | 9.346   | 0.314573079 |
| Plek          | 1.2145  | 3.863   | 0.314392959 |
| Ifit1         | 5.3785  | 17.1235 | 0.314100505 |
| Poc5          | 2.411   | 7.683   | 0.31380971  |
| 1700026D08Rik | 1.2675  | 4.0395  | 0.313776457 |
| Ctdsp2        | 6.383   | 20.3545 | 0.313591589 |
| Gpatch2       | 2.306   | 7.359   | 0.313357793 |
| Zfp458        | 1.4115  | 4.5085  | 0.313075302 |
| Shmt2         | 2.384   | 7.6245  | 0.312676241 |
| Maml2         | 1.6035  | 5.1305  | 0.312542637 |
| Zfp71-rs1     | 12.105  | 38.7695 | 0.312229975 |
| Slc15a4       | 1.493   | 4.784   | 0.31208194  |
| Ythdf3        | 5.2685  | 16.8945 | 0.311847051 |
| S1pr5         | 1.1075  | 3.552   | 0.311796171 |
| Adora1        | 5.334   | 17.1075 | 0.311793073 |
| Fam113a       | 1.7575  | 5.6385  | 0.311696373 |
| Rtl1          | 1.1875  | 3.811   | 0.311598006 |
| 6330503K22Rik | 6.355   | 20.41   | 0.311366977 |
| Phf16         | 2.607   | 8.3745  | 0.311302167 |
| Cog3          | 2.312   | 7.43    | 0.311170929 |
| Zbtb1         | 1.139   | 3.661   | 0.311117181 |
| Serpina3n     | 5.541   | 17.812  | 0.311082416 |
| Igdec4        | 1.305   | 4.196   | 0.311010486 |
| Traf3         | 3.1375  | 10.093  | 0.310859011 |
| Prrc1         | 3.3225  | 10.689  | 0.310833567 |
| Rad54l2       | 1.7525  | 5.642   | 0.310616803 |
| Gadd45a       | 2.955   | 9.524   | 0.310268795 |
| Abhd4         | 3.1685  | 10.214  | 0.310211474 |
| Sox6          | 1.7855  | 5.7605  | 0.309955733 |
| Rps6ka5       | 1.2895  | 4.162   | 0.309827006 |
| Lipi          | 4.469   | 14.4255 | 0.30979862  |
| Cpne9         | 1.3905  | 4.492   | 0.309550312 |
| Gm10409       | 6.2825  | 20.3075 | 0.30936846  |
| Ctnbp2        | 3.889   | 12.58   | 0.309141494 |
| 4930451C15Rik | 1.8385  | 5.9565  | 0.308654411 |
| Zfp407        | 1.4715  | 4.7695  | 0.308522906 |
| LOC100503712  | 10.6315 | 34.464  | 0.308481314 |
| Bcan          | 2.6395  | 8.557   | 0.308460909 |
| Gpm6b         | 9.176   | 29.7495 | 0.308442159 |
| Gm5481        | 1.084   | 3.515   | 0.308392603 |
| Trib1         | 1.7765  | 5.7625  | 0.308286334 |
| Eml5          | 2.1285  | 6.9065  | 0.308187939 |
| Elov17        | 1.426   | 4.628   | 0.30812446  |
| LOC100504045  | 26.5465 | 86.16   | 0.30810701  |
| Chmp1b        | 4.799   | 15.5935 | 0.307756437 |
| Erbp2ip       | 4.122   | 13.4175 | 0.307210732 |
| Sema5b        | 1.7325  | 5.642   | 0.30707196  |

|               |        |         |             |
|---------------|--------|---------|-------------|
| Ryk           | 1.632  | 5.322   | 0.306651635 |
| LOC100502721  | 1.2765 | 4.172   | 0.30596836  |
| Gna12         | 5.2695 | 17.2275 | 0.305877231 |
| Zfp618        | 1.0375 | 3.394   | 0.305686506 |
| F830016D02Rik | 1.081  | 3.537   | 0.305626237 |
| Optn          | 3.065  | 10.0325 | 0.305507102 |
| Gnai3         | 1.7785 | 5.8235  | 0.305400532 |
| D830030K20Rik | 1.791  | 5.8655  | 0.305344813 |
| Chst11        | 2.769  | 9.07    | 0.305292172 |
| Gm14461       | 1.177  | 3.8555  | 0.305278174 |
| Dnmt3a        | 5.299  | 17.3585 | 0.305268312 |
| Numa1         | 4.0695 | 13.3325 | 0.305231577 |
| Kcnk9         | 7.2685 | 23.823  | 0.305104311 |
| Zfp652        | 7.6785 | 25.172  | 0.305041316 |
| Ticam1        | 1.092  | 3.5805  | 0.304985337 |
| Fam131b       | 2.515  | 8.248   | 0.304922405 |
| Cmtm6         | 1.089  | 3.572   | 0.304871221 |
| Spg20         | 4.862  | 15.958  | 0.304674771 |
| Rps6kb2       | 1.292  | 4.2465  | 0.304250559 |
| Fam59b        | 1.8845 | 6.1965  | 0.304123295 |
| Magt1         | 1.0055 | 3.307   | 0.304052011 |
| Rnf26         | 1.297  | 4.2665  | 0.30399625  |
| Cdc73         | 6.948  | 22.8615 | 0.303917066 |
| Myc           | 2.912  | 9.5895  | 0.303665467 |
| Zc3h18        | 2.7575 | 9.0835  | 0.303572412 |
| Zfp169        | 1.742  | 5.7405  | 0.303457887 |
| Lap3          | 7.003  | 23.0885 | 0.303311172 |
| Plcd4         | 1.3045 | 4.301   | 0.303301558 |
| Etv5          | 4.038  | 13.3285 | 0.302959823 |
| Otx1          | 2.242  | 7.408   | 0.302645788 |
| Tigd3         | 3.8455 | 12.7065 | 0.302640381 |
| Wdr44         | 1.262  | 4.172   | 0.302492809 |
| Dnase2a       | 1.2435 | 4.112   | 0.302407588 |
| Vps37a        | 6.4535 | 21.3455 | 0.302335387 |
| Gm10615       | 1.5085 | 5       | 0.3017      |
| Gm10560       | 2.0665 | 6.851   | 0.301634798 |
| Stk33         | 1.06   | 3.5155  | 0.301521832 |
| Phf21a        | 6.693  | 22.211  | 0.301337175 |
| Pcdhb17       | 1.44   | 4.781   | 0.301192219 |
| Flnb          | 2.9445 | 9.779   | 0.301104407 |
| Zfp454        | 1.454  | 4.829   | 0.301097536 |
| Phf17         | 4.498  | 14.957  | 0.300728756 |
| Pgr           | 2.841  | 9.456   | 0.300444162 |
| Serac1        | 4.106  | 13.6675 | 0.300420706 |
| Foxr1         | 1.121  | 3.7335  | 0.300254453 |
| Scmh1         | 6.261  | 20.8635 | 0.300093465 |
| Ppard         | 2.1515 | 7.17    | 0.300069735 |
| Tshz3         | 1.142  | 3.8065  | 0.300013135 |
| Nacc2         | 10.123 | 33.7835 | 0.299643317 |
| Flrt1         | 4.1105 | 13.7465 | 0.299021569 |
| Synj2bp       | 17.836 | 59.692  | 0.298800509 |
| Mrm1          | 1.4725 | 4.9365  | 0.298288261 |
| Fam184a       | 3.6735 | 12.331  | 0.297907712 |
| Ankrd12       | 19.836 | 66.6275 | 0.297714908 |
| Fam98a        | 3.267  | 10.988  | 0.297324354 |



|               |          |          |             |
|---------------|----------|----------|-------------|
| Rdbp          | 3.2325   | 10.8725  | 0.297309726 |
| Vegfa         | 5.3275   | 17.926   | 0.29719402  |
| Eps8          | 4.592    | 15.4575  | 0.297072618 |
| Plekha5       | 2.9055   | 9.7855   | 0.296918911 |
| Sh3glb1       | 5.189    | 17.477   | 0.296904503 |
| 6330403M23Rik | 12.4295  | 41.8785  | 0.296799074 |
| LOC100504575  | 1.2525   | 4.2215   | 0.296695487 |
| Slc44a1       | 3.997    | 13.483   | 0.296447378 |
| Fhad1         | 1.6525   | 5.5755   | 0.296385974 |
| Nek7          | 4.1835   | 14.1245  | 0.296187476 |
| LOC100502769  | 1.1235   | 3.794    | 0.296125461 |
| Smtnl2        | 1.308    | 4.4175   | 0.296095076 |
| Pogk          | 2.972    | 10.04    | 0.296015936 |
| Dnajc14       | 2.393    | 8.097    | 0.295541559 |
| Sepw1         | 122.7485 | 415.7825 | 0.295222863 |
| Tti1          | 2.129    | 7.213    | 0.295161514 |
| Ifit3         | 8.643    | 29.323   | 0.29475156  |
| Stk32a        | 2.0035   | 6.802    | 0.294545722 |
| Dab2          | 2.0175   | 6.8525   | 0.294418096 |
| Hs6st3        | 1.8945   | 6.4375   | 0.294291262 |
| Fgfr2         | 3.393    | 11.5305  | 0.294263041 |
| Pum2          | 10.0495  | 34.2235  | 0.293643257 |
| Zfx           | 1.0955   | 3.732    | 0.293542337 |
| Pdcd7         | 2.6785   | 9.1365   | 0.293164779 |
| Ctdsp1        | 1.9125   | 6.531    | 0.292834175 |
| Mpa21         | 3.246    | 11.1155  | 0.29202465  |
| Tyr           | 1.163    | 3.983    | 0.291990962 |
| Tbc1d16       | 1.429    | 4.904    | 0.29139478  |
| Pm20d2        | 2.1845   | 7.4975   | 0.291363788 |
| Tstd2         | 1.445    | 4.9645   | 0.291066573 |
| Zscan2        | 1.2595   | 4.3325   | 0.290709752 |
| Tcf4          | 9.3515   | 32.171   | 0.290681048 |
| Chat          | 2.0815   | 7.169    | 0.290347329 |
| D19Erttd386e  | 1.228    | 4.2345   | 0.289998819 |
| Bmpr1a        | 2.6775   | 9.236    | 0.289898224 |
| Spop          | 40.4015  | 139.4585 | 0.289702671 |
| Igf2bp3       | 1.2535   | 4.3425   | 0.288658607 |
| Ppfibp2       | 1.3035   | 4.5285   | 0.287843657 |
| Dbp           | 5.106    | 17.742   | 0.287791681 |
| Zfp692-ps     | 1.2225   | 4.248    | 0.287782486 |
| Rnf31         | 1.767    | 6.1455   | 0.287527459 |
| Itpk1         | 9.9365   | 34.5685  | 0.287443771 |
| AW549877      | 4.236    | 14.7525  | 0.287137773 |
| Klhl5         | 2.1895   | 7.6265   | 0.287091064 |
| Dhrs3         | 1.083    | 3.776    | 0.286811441 |
| D2hgdh        | 1.246    | 4.3465   | 0.286667434 |
| BC053749      | 1.8825   | 6.569    | 0.286573299 |
| Ppp1r1b       | 1.849    | 6.478    | 0.285427601 |
| Yipf6         | 5.7985   | 20.3195  | 0.285366274 |
| Tmem186       | 1.064    | 3.733    | 0.285025449 |
| Zbtb16        | 1.1375   | 3.9955   | 0.284695282 |
| Pomgnt1       | 1.701    | 5.9855   | 0.284186785 |
| LOC100503907  | 3.467    | 12.2095  | 0.283959212 |
| Entpd5        | 1.827    | 6.4355   | 0.283894025 |
| Ankrd57       | 1.5595   | 5.5005   | 0.28351968  |

|               |         |          |             |
|---------------|---------|----------|-------------|
| Kbtbd11       | 6.9475  | 24.508   | 0.283478864 |
| Usp53         | 1.996   | 7.05     | 0.283120567 |
| Qser1         | 1.197   | 4.2285   | 0.283079106 |
| Kdm3b         | 3.7645  | 13.306   | 0.282917481 |
| Gm10406       | 2.329   | 8.2395   | 0.282662783 |
| Ccdc9         | 1.5805  | 5.595    | 0.282484361 |
| Zfp654        | 1.1345  | 4.018    | 0.282354405 |
| Till11        | 1.334   | 4.74     | 0.281434599 |
| Irf7          | 1.1385  | 4.052    | 0.280972359 |
| Tshz2         | 17.879  | 63.6785  | 0.280769805 |
| Wars2         | 1.211   | 4.316    | 0.280583874 |
| Chfr          | 1.6785  | 5.988    | 0.280310621 |
| Hira          | 2.2465  | 8.034    | 0.279624098 |
| Fitm2         | 1.832   | 6.557    | 0.279396065 |
| Gpr155        | 2.0555  | 7.359    | 0.279317842 |
| Zfp449        | 1.293   | 4.6365   | 0.278874151 |
| Fnbp1         | 28.586  | 102.5085 | 0.27886468  |
| Ccng2         | 1.2535  | 4.498    | 0.278679413 |
| Lass5         | 2.4935  | 8.948    | 0.278665624 |
| 8430426H19Rik | 1.8805  | 6.755    | 0.27838638  |
| Agps          | 1.908   | 6.86     | 0.278134111 |
| Gna13         | 6.5915  | 23.749   | 0.277548528 |
| Wdr31         | 1.0985  | 3.9615   | 0.277293954 |
| Akap12        | 4.1225  | 14.905   | 0.276585039 |
| Rora          | 2.756   | 9.9905   | 0.275862069 |
| Rbm12b        | 1.33    | 4.83     | 0.275362319 |
| Hsd17b7       | 1.482   | 5.383    | 0.275311165 |
| Cat           | 15.2595 | 55.6105  | 0.274399619 |
| Gmeb1         | 2.168   | 7.9025   | 0.274343562 |
| Sall1         | 1.4755  | 5.38     | 0.274256506 |
| Ccnl2         | 2.894   | 10.56    | 0.27405303  |
| 4930455F23Rik | 7.5725  | 27.645   | 0.273919334 |
| Plekhhb1      | 28.367  | 103.6475 | 0.273687257 |
| Pla2g7        | 4.031   | 14.7405  | 0.273464265 |
| Cbwd1         | 1.4865  | 5.4505   | 0.272727273 |
| B4galt7       | 1.1285  | 4.149    | 0.271993251 |
| A630007B06Rik | 9.833   | 36.26    | 0.271180364 |
| Acbd5         | 5.0125  | 18.4885  | 0.271114477 |
| Itpkb         | 1.468   | 5.417    | 0.270998708 |
| Ubn2          | 3.4995  | 12.916   | 0.270943016 |
| Ift80         | 1.337   | 4.9435   | 0.270456155 |
| Sesn2         | 1.5175  | 5.614    | 0.270306377 |
| Mcc           | 1.537   | 5.688    | 0.270218003 |
| Syde1         | 1.2605  | 4.678    | 0.269452758 |
| Rsf1          | 4.203   | 15.601   | 0.269405807 |
| Eif2ak2       | 2.787   | 10.345   | 0.26940551  |
| A930001N09Rik | 7.8535  | 29.229   | 0.268688631 |
| Prr18         | 2.098   | 7.812    | 0.268561188 |
| Ranbp3l       | 1.0655  | 3.9735   | 0.268151504 |
| Toe1          | 1.012   | 3.781    | 0.26765406  |
| Pigl          | 3.891   | 14.5395  | 0.267615805 |
| 2410089E03Rik | 1.6605  | 6.2135   | 0.267240686 |
| Scrn3         | 2.492   | 9.338    | 0.266866567 |
| Sfrs18        | 10.287  | 38.579   | 0.266647658 |
| Ston2         | 2.482   | 9.32     | 0.266309013 |

|               |         |          |             |
|---------------|---------|----------|-------------|
| 4732418C07Rik | 5.445   | 20.4515  | 0.26623964  |
| Ednrb         | 3.7295  | 14.019   | 0.266031814 |
| Gm3365        | 24.046  | 90.4075  | 0.265973509 |
| Rgs3          | 2.4035  | 9.0455   | 0.265712233 |
| Kcnip3        | 10.1025 | 38.043   | 0.265554767 |
| Fam53b        | 1.2065  | 4.5495   | 0.265193977 |
| Snx33         | 1.052   | 3.967    | 0.265187799 |
| Stk38         | 1.5885  | 5.991    | 0.265147722 |
| Tcf12         | 2.953   | 11.1435  | 0.264997532 |
| Homer2        | 1.935   | 7.319    | 0.26438038  |
| Poc1b         | 1.876   | 7.1065   | 0.263983677 |
| Adcy9         | 1.1165  | 4.23     | 0.263947991 |
| Map6d1        | 3.2145  | 12.1825  | 0.263862097 |
| Aspa          | 4.975   | 18.868   | 0.263673945 |
| Gm10362       | 4.7025  | 17.848   | 0.263474899 |
| AY074887      | 3.375   | 12.839   | 0.26287094  |
| Galnt16       | 2.704   | 10.294   | 0.262677288 |
| LOC100502983  | 35.6005 | 135.6435 | 0.262456365 |
| Ccnd2         | 1.823   | 6.9515   | 0.262245559 |
| Cyp2j5        | 3.839   | 14.6455  | 0.262128299 |
| Aqp11         | 1.0205  | 3.895    | 0.262002567 |
| Lhx5          | 1.3315  | 5.083    | 0.261951603 |
| Isg15         | 2.8     | 10.689   | 0.261951539 |
| Tns1          | 1.7465  | 6.6695   | 0.261863708 |
| Jakmip3       | 1.899   | 7.253    | 0.261822694 |
| Mdc1          | 1.829   | 6.9915   | 0.261603376 |
| Ccdc117       | 2.0285  | 7.7895   | 0.260414661 |
| Slc14a1       | 1.762   | 6.771    | 0.260227441 |
| 1700030J22Rik | 1.505   | 5.7865   | 0.260088136 |
| Setd8         | 16.154  | 62.1205  | 0.260042981 |
| App12         | 3.0715  | 11.8185  | 0.259889157 |
| Trp53bp1      | 6.5345  | 25.159   | 0.259728129 |
| Alkbh1        | 3.188   | 12.2785  | 0.259640836 |
| Ptn           | 30.728  | 118.3525 | 0.259631186 |
| Klhl4         | 1.3585  | 5.2365   | 0.259429008 |
| Twsg1         | 3.6085  | 13.9135  | 0.259352427 |
| Eya3          | 2.274   | 8.768    | 0.25935219  |
| Zfp3          | 2.9015  | 11.1975  | 0.259120339 |
| Letm2         | 2.444   | 9.4325   | 0.259104161 |
| Aga           | 1.364   | 5.269    | 0.258872651 |
| Vamp5         | 1.581   | 6.1105   | 0.258734964 |
| LOC100504503  | 19.5495 | 75.5955  | 0.258606663 |
| Pdp2          | 1.4795  | 5.724    | 0.258473096 |
| Atxn7         | 2.5395  | 9.8275   | 0.25840753  |
| Gm14438       | 1.2425  | 4.8105   | 0.258289159 |
| Pllp          | 3.9405  | 15.2605  | 0.258215655 |
| Pcgf6         | 1.79    | 6.9345   | 0.258129642 |
| Prrg3         | 7.83    | 30.403   | 0.257540374 |
| Sirt7         | 1.2915  | 5.019    | 0.257322176 |
| Vmn2r55       | 1.1155  | 4.344    | 0.256790976 |
| Cd59a         | 4.99    | 19.4475  | 0.25658825  |
| Adrbk2        | 2.177   | 8.489    | 0.256449523 |
| Spg11         | 1.209   | 4.7145   | 0.256442889 |
| Adipor2       | 2.779   | 10.848   | 0.256176254 |
| Psg28         | 7.858   | 30.6985  | 0.255973419 |

|               |         |         |             |
|---------------|---------|---------|-------------|
| Rhou          | 10.69   | 41.782  | 0.255851802 |
| F830016B08Rik | 4.8055  | 18.7835 | 0.255836239 |
| Ptbp1         | 3.678   | 14.414  | 0.255168586 |
| Ttl3          | 1.057   | 4.145   | 0.255006031 |
| LOC100504256  | 1.559   | 6.1145  | 0.2549677   |
| Psat1         | 15.403  | 60.423  | 0.254919484 |
| Acot1         | 1.121   | 4.3985  | 0.254859611 |
| Gja1          | 2.702   | 10.6155 | 0.254533465 |
| Tirap         | 1.293   | 5.0925  | 0.253902798 |
| Haus2         | 6.0005  | 23.6755 | 0.253447657 |
| Tet1          | 1.9275  | 7.607   | 0.25338504  |
| Rasa2         | 1.0755  | 4.254   | 0.252820874 |
| Brwd3         | 1.2855  | 5.0855  | 0.252777505 |
| Zbed6         | 1.8485  | 7.3135  | 0.25275176  |
| Ripk2         | 1.2455  | 4.946   | 0.251819652 |
| Iws1          | 1.9365  | 7.697   | 0.251591529 |
| Fbxo7         | 2.4515  | 9.766   | 0.251023961 |
| Igsf11        | 3.5715  | 14.2455 | 0.250710751 |
| Echdc1        | 1.904   | 7.6005  | 0.250509835 |
| S100a6        | 1.794   | 7.165   | 0.25038381  |
| Dcx           | 2.014   | 8.046   | 0.250310713 |
| Tspan15       | 1.0695  | 4.2795  | 0.249912373 |
| 7120451J01Rik | 1.0025  | 4.0155  | 0.249657577 |
| Ddx19a        | 3.7065  | 14.849  | 0.249612769 |
| Slc30a10      | 1.3655  | 5.4755  | 0.249383618 |
| Cd3d          | 3.1275  | 12.5435 | 0.249332324 |
| Smyd4         | 1.005   | 4.039   | 0.248823966 |
| Lrrc8b        | 3.0065  | 12.0885 | 0.248707449 |
| Zfp710        | 1.265   | 5.0925  | 0.248404516 |
| Lpcat1        | 2.368   | 9.55    | 0.247958115 |
| Rcor1         | 1.4405  | 5.8095  | 0.247955934 |
| Zbp1          | 1.2935  | 5.2235  | 0.247630899 |
| Slc16a7       | 1.2825  | 5.1815  | 0.247515198 |
| Pak4          | 1.268   | 5.137   | 0.246836675 |
| Ppcdc         | 1.19    | 4.827   | 0.246529936 |
| Hmgal-rs1     | 1.491   | 6.048   | 0.246527778 |
| Wrn           | 1.057   | 4.306   | 0.245471435 |
| Per3          | 1.7485  | 7.127   | 0.245334643 |
| Gas2          | 1.1975  | 4.8825  | 0.245263697 |
| B2m           | 152.766 | 623.64  | 0.24495863  |
| P4ha3         | 4.0125  | 16.3815 | 0.244940939 |
| Maml3         | 1.5315  | 6.256   | 0.244804987 |
| F3            | 1.866   | 7.632   | 0.244496855 |
| Acap2         | 1.945   | 7.9575  | 0.2444235   |
| Abhd3         | 2.6035  | 10.658  | 0.2442766   |
| Rbm33         | 2.302   | 9.43    | 0.244114528 |
| Tnfaip6       | 2.736   | 11.209  | 0.244089571 |
| Gpr17         | 1.658   | 6.7975  | 0.243913203 |
| Lhx2          | 1.043   | 4.279   | 0.243748539 |
| Snai2         | 1.2675  | 5.216   | 0.243002301 |
| LOC100503779  | 14.6265 | 60.286  | 0.242618518 |
| Isg20l2       | 1.3415  | 5.5485  | 0.241777057 |
| Lypd6b        | 1.5685  | 6.4905  | 0.241660889 |
| Gadd45g       | 1.745   | 7.2305  | 0.241338773 |
| Nhs1l         | 1.1405  | 4.731   | 0.241069541 |

|               |        |          |             |
|---------------|--------|----------|-------------|
| Timp4         | 1.1995 | 4.978    | 0.240960225 |
| LOC100503972  | 38.746 | 160.9645 | 0.240711461 |
| Prkx          | 1.1375 | 4.733    | 0.240333826 |
| Foxn3         | 7.0115 | 29.235   | 0.239832393 |
| Atxn1l        | 1.453  | 6.1      | 0.238196721 |
| Slc29a3       | 2.147  | 9.03     | 0.237763012 |
| Sdccag8       | 4.5625 | 19.1955  | 0.237685916 |
| Cep57         | 1.66   | 6.989    | 0.237516097 |
| Tmem39a       | 1.7595 | 7.4115   | 0.237401336 |
| Myt1          | 1.0715 | 4.5135   | 0.237398914 |
| Ifitm2        | 2.4305 | 10.242   | 0.237307167 |
| Golgb1        | 7.5525 | 31.8295  | 0.237279882 |
| Zfp353        | 42.203 | 178.2385 | 0.236778249 |
| Gstm7         | 8.754  | 37.015   | 0.236498717 |
| Cdr1          | 57.535 | 243.6455 | 0.236142264 |
| Nrsn1         | 31.198 | 132.202  | 0.235987353 |
| LOC100504551  | 1.493  | 6.3495   | 0.235136625 |
| Klhdc1        | 1.3605 | 5.7955   | 0.2347511   |
| Golga4        | 9.5305 | 40.622   | 0.234614248 |
| LOC100503793  | 1.124  | 4.801    | 0.234117892 |
| Ccdc149       | 1.4555 | 6.22     | 0.234003215 |
| Fabp7         | 6.818  | 29.154   | 0.233861563 |
| LOC100504473  | 1.251  | 5.3635   | 0.233243218 |
| Cdc42ep4      | 3.405  | 14.638   | 0.232613745 |
| Lig1          | 2.619  | 11.264   | 0.232510653 |
| Sorbs3        | 3.3385 | 14.384   | 0.232098165 |
| LOC100504538  | 4.392  | 18.926   | 0.232061714 |
| Dph5          | 2.051  | 8.8485   | 0.231790699 |
| Chrm2         | 1.742  | 7.531    | 0.231310583 |
| Tmem101       | 1.2745 | 5.516    | 0.231055112 |
| Deaf1         | 4.8335 | 20.9575  | 0.230633425 |
| 2310009B15Rik | 4.455  | 19.3275  | 0.230500582 |
| Onecut3       | 1.8515 | 8.044    | 0.230171556 |
| Snx18         | 1.6875 | 7.3315   | 0.230171179 |
| Ddn           | 1.5995 | 6.9525   | 0.230061129 |
| Rasl10b       | 2.711  | 11.7865  | 0.230008908 |
| Ppap2b        | 4.306  | 18.729   | 0.229910833 |
| Sparcl1       | 39.559 | 172.116  | 0.229839178 |
| Grk4          | 50.344 | 219.675  | 0.229174917 |
| Sfn9          | 1.5475 | 6.7935   | 0.227791271 |
| Pnrc2         | 4.926  | 21.7575  | 0.226404688 |
| Lcp2          | 1.5145 | 6.6925   | 0.226298095 |
| Ubxn8         | 1.844  | 8.168    | 0.22575906  |
| Rsad1         | 1.057  | 4.6845   | 0.225637741 |
| Fcho2         | 1.499  | 6.6525   | 0.225328824 |
| Rhog          | 7.2105 | 32.0505  | 0.224973089 |
| Dok4          | 1.302  | 5.792    | 0.224792818 |
| Padi2         | 1.8025 | 8.032    | 0.224414841 |
| Lims1         | 1.6235 | 7.2445   | 0.224101042 |
| Sp9           | 1.077  | 4.8115   | 0.22383872  |
| Prox1         | 2.8925 | 12.9265  | 0.223765134 |
| H2-D1         | 16.302 | 72.9405  | 0.223497234 |
| LOC100504024  | 10.002 | 44.7965  | 0.223276372 |
| Cd9           | 3.696  | 16.6135  | 0.222469678 |
| Htra1         | 1.197  | 5.3895   | 0.222098525 |

|               |          |          |             |
|---------------|----------|----------|-------------|
| Prdm12        | 1.006    | 4.538    | 0.221683561 |
| Lima1         | 1.2725   | 5.7435   | 0.221554801 |
| Gm11703       | 1.2975   | 5.8585   | 0.221473073 |
| Smcr7l        | 1.158    | 5.2325   | 0.221309126 |
| Jam3          | 1.8205   | 8.2315   | 0.221162607 |
| Lcp1          | 1.137    | 5.1415   | 0.22114169  |
| Arhgap17      | 1.2155   | 5.5005   | 0.220979911 |
| Carhsp1       | 4.438    | 20.1245  | 0.220527218 |
| Nab2          | 2.508    | 11.4015  | 0.219971056 |
| Ddr1          | 1.079    | 4.9145   | 0.21955438  |
| Epas1         | 6.995    | 31.953   | 0.218915282 |
| Trim21        | 1.1005   | 5.028    | 0.218874304 |
| Nras          | 3.6765   | 16.8255  | 0.218507622 |
| Dusp11        | 1.485    | 6.8005   | 0.218366297 |
| Utp14b        | 1.2975   | 5.977    | 0.217082148 |
| LOC100502836  | 12.387   | 57.0745  | 0.217032125 |
| Xiap          | 3.5025   | 16.141   | 0.21699399  |
| Ino80d        | 2.244    | 10.39    | 0.215976901 |
| Axin2         | 1.7065   | 7.903    | 0.215930659 |
| Tspan18       | 2.2035   | 10.2455  | 0.215070031 |
| Nfe2l2        | 3.1565   | 14.6905  | 0.214866751 |
| Ppp1r16b      | 7.4425   | 34.695   | 0.214512178 |
| Tmf1          | 4.355    | 20.3725  | 0.213768561 |
| Hs1bp3        | 1.398    | 6.5425   | 0.213679786 |
| A730011L01Rik | 1.7125   | 8.031    | 0.21323621  |
| Cacna2d1      | 2.362    | 11.0855  | 0.213071129 |
| Nmi           | 1.128    | 5.3315   | 0.211572728 |
| LOC100503916  | 35.518   | 168.021  | 0.211390243 |
| Slc25a18      | 2.056    | 9.7365   | 0.211164176 |
| Ifit2         | 1.0165   | 4.833    | 0.21032485  |
| Purb          | 3.0895   | 14.6955  | 0.210234426 |
| Fmr1          | 1.282    | 6.1075   | 0.209905853 |
| LOC100503762  | 1.36     | 6.4835   | 0.209763245 |
| Rtn4rl1       | 1.006    | 4.812    | 0.209060682 |
| Lrrc3         | 1.951    | 9.346    | 0.208752407 |
| Idua          | 1.5305   | 7.377    | 0.207469161 |
| Cald1         | 1.2475   | 6.0285   | 0.206933731 |
| Rhbdl3        | 1.504    | 7.2835   | 0.206494131 |
| Fam175a       | 1.0515   | 5.1045   | 0.205994711 |
| Cep97         | 1.4285   | 6.9425   | 0.205761613 |
| Syt10         | 1.9665   | 9.6185   | 0.204449758 |
| Rnpc3         | 1.1915   | 5.84     | 0.204023973 |
| Ak2           | 5.358    | 26.266   | 0.203989949 |
| Enpp2         | 5.514    | 27.0505  | 0.203840964 |
| Gltscr1       | 2.043    | 10.041   | 0.20346579  |
| Rassf2        | 3.0225   | 14.857   | 0.203439456 |
| Avp           | 57.465   | 282.5585 | 0.203373815 |
| Tmem229a      | 2.7495   | 13.537   | 0.203109995 |
| Snrnp35       | 2.7755   | 13.837   | 0.200585387 |
| 2010109K11Rik | 1.362    | 6.8065   | 0.200102843 |
| Stk3          | 1.4095   | 7.0875   | 0.198871252 |
| Gm4076        | 288.1845 | 1451.244 | 0.198577565 |
| Ttf1          | 1.001    | 5.06     | 0.197826087 |
| Tdrd3         | 1.8465   | 9.3365   | 0.197772184 |
| LOC100503152  | 1.371    | 6.9325   | 0.197764154 |

|               |          |          |             |
|---------------|----------|----------|-------------|
| Tmem132b      | 1.9505   | 9.893    | 0.197159608 |
| Gbp6          | 1.573    | 7.9805   | 0.197105445 |
| Ddit4         | 3.0665   | 15.5595  | 0.197082168 |
| Myo1d         | 1.261    | 6.408    | 0.196785268 |
| Sdc4          | 3.4885   | 17.745   | 0.196590589 |
| Pxn           | 1.0265   | 5.225    | 0.19645933  |
| Fermt2        | 3.021    | 15.3925  | 0.196264414 |
| 4931406C07Rik | 1.253    | 6.4515   | 0.194218399 |
| Adcyap1       | 1.884    | 9.704    | 0.194146744 |
| Kctd12        | 1.6615   | 8.558    | 0.194145828 |
| LOC100503843  | 1.792    | 9.24     | 0.193939394 |
| Mro           | 1.086    | 5.6135   | 0.193462189 |
| Mt2           | 22.023   | 114.1345 | 0.192956556 |
| Cpne3         | 1.0505   | 5.456    | 0.192540323 |
| 1200009O22Rik | 1.314    | 6.84     | 0.192105263 |
| Mocs1         | 1.531    | 7.9875   | 0.191674491 |
| Zeb2          | 2.843    | 14.899   | 0.190818176 |
| Rwdd3         | 1.351    | 7.151    | 0.188924626 |
| Cflar         | 1.04     | 5.515    | 0.188576609 |
| Strada        | 1.2395   | 6.574    | 0.188545786 |
| 2300009A05Rik | 1.149    | 6.0985   | 0.188406985 |
| Nfia          | 3.995    | 21.243   | 0.18806195  |
| LOC100503757  | 154.9455 | 826.06   | 0.187571726 |
| Lix1          | 1.376    | 7.3665   | 0.186791556 |
| Dtx3l         | 1.171    | 6.2775   | 0.186539227 |
| Rod1          | 1.0455   | 5.6085   | 0.18641348  |
| Rassf8        | 1.187    | 6.3995   | 0.185483241 |
| Epb4.112      | 3.4375   | 18.593   | 0.184881407 |
| Kcnj16        | 1.443    | 7.812    | 0.184715822 |
| Glul          | 70.842   | 384.129  | 0.184422421 |
| Plekhhl1      | 2.272    | 12.388   | 0.183403294 |
| Nwd1          | 1.527    | 8.349    | 0.182896155 |
| Nkain4        | 1.9385   | 10.645   | 0.182104274 |
| Clic4         | 5.6455   | 31.0585  | 0.181769886 |
| Gstm1         | 63.4465  | 349.2085 | 0.181686586 |
| Gng12         | 2.659    | 14.6585  | 0.181396459 |
| Tagln2        | 1.5045   | 8.321    | 0.180807595 |
| Gorab         | 1.0095   | 5.592    | 0.180525751 |
| Zfp641        | 1.1475   | 6.367    | 0.180226166 |
| Chsy1         | 1.1845   | 6.6095   | 0.179211741 |
| Tex9          | 2.6955   | 15.059   | 0.178995949 |
| Apoe          | 19.279   | 108.2685 | 0.178066566 |
| Timp3         | 1.9185   | 10.782   | 0.177935448 |
| Akap5         | 6.415    | 36.1495  | 0.177457503 |
| Hsd17b11      | 1.485    | 8.3815   | 0.177175923 |
| Zdhhc24       | 2.508    | 14.17    | 0.176993649 |
| Daam2         | 1.721    | 9.749    | 0.176530926 |
| 4930420K17Rik | 1.2405   | 7.1265   | 0.174068617 |
| Slc17a6       | 4.602    | 26.52    | 0.173529412 |
| Pou2f1        | 3.042    | 17.5415  | 0.173417325 |
| Exd2          | 2.167    | 12.531   | 0.172931131 |
| Unk           | 1.2045   | 6.9755   | 0.172675794 |
| Acsbg1        | 1.719    | 9.9695   | 0.172425899 |
| Itih3         | 2.334    | 13.5435  | 0.172333592 |
| Skap2         | 1.7785   | 10.3675  | 0.171545696 |

|               |         |          |             |
|---------------|---------|----------|-------------|
| Dci           | 1.008   | 5.92     | 0.17027027  |
| Pxmp4         | 1.401   | 8.2405   | 0.170013955 |
| Slc1a2        | 11.6765 | 68.683   | 0.170005678 |
| Gm98          | 2.21    | 13.0585  | 0.169238427 |
| Tor1aip1      | 3.297   | 19.4905  | 0.169159334 |
| Mafb          | 2.0395  | 12.0895  | 0.168700112 |
| D16Ertd472e   | 1.6255  | 9.657    | 0.168323496 |
| Vamp3         | 3.2895  | 19.6075  | 0.167767436 |
| Reep3         | 1.549   | 9.2585   | 0.167305719 |
| 1700019D03Rik | 1.142   | 6.9055   | 0.165375425 |
| Zfp81         | 1.034   | 6.2915   | 0.164348724 |
| Cd274         | 2.8925  | 17.669   | 0.163704794 |
| Cnp           | 27.603  | 173.3755 | 0.159209346 |
| Tapbp1        | 1.2705  | 8.023    | 0.158357223 |
| LOC100502966  | 1.2135  | 7.6755   | 0.158100449 |
| Lss           | 1.0705  | 6.7745   | 0.158019042 |
| Gm7339        | 4.031   | 25.758   | 0.156495069 |
| Phldb1        | 1.533   | 9.8285   | 0.155974971 |
| Ebf1          | 1.026   | 6.586    | 0.155784998 |
| Map4k5        | 1.4865  | 9.679    | 0.153579915 |
| Lass2         | 3.4555  | 22.653   | 0.152540502 |
| Slc6a11       | 9.7085  | 63.6525  | 0.152523467 |
| Micall1       | 2.1645  | 14.2885  | 0.15148546  |
| Prex1         | 1.682   | 11.134   | 0.151068798 |
| Onecut2       | 1.24    | 8.214    | 0.150961773 |
| Tatdn3        | 1.7885  | 11.885   | 0.150483803 |
| Ugt8a         | 1.546   | 10.2795  | 0.15039642  |
| Tst           | 4.0845  | 27.318   | 0.149516802 |
| Ucp2          | 2.5555  | 17.272   | 0.14795623  |
| Mbp           | 43.118  | 294.1815 | 0.14656938  |
| Atp1a2        | 3.5685  | 24.386   | 0.146333962 |
| Tspan2        | 9.3255  | 64.094   | 0.145497238 |
| Plagl2        | 1.0845  | 7.541    | 0.143813818 |
| Triobp        | 1.0605  | 7.4265   | 0.142799434 |
| LOC100503509  | 8.7645  | 61.9595  | 0.141455305 |
| S100a1        | 3.427   | 24.3105  | 0.140967895 |
| Rasgrp3       | 1.1785  | 8.399    | 0.140314323 |
| Igtp          | 6.416   | 46.439   | 0.138159736 |
| LOC100503233  | 1.781   | 12.9315  | 0.137725709 |
| Msn           | 1.6515  | 12.0425  | 0.137139298 |
| Sap30l        | 2.314   | 16.881   | 0.137077187 |
| Mmachc        | 21.494  | 158.359  | 0.135729576 |
| Gab1          | 3.0605  | 22.828   | 0.134067811 |
| Acss1         | 1.081   | 8.093    | 0.133572223 |
| Tmem88b       | 5.9335  | 44.438   | 0.133523111 |
| Xaf1          | 1.7275  | 13.067   | 0.13220326  |
| Ngfr          | 2.153   | 16.361   | 0.131593423 |
| Csda          | 3.7145  | 28.58    | 0.129968509 |
| Tgfa          | 1.5115  | 11.686   | 0.129342803 |
| Rftn2         | 1.0555  | 8.215    | 0.12848448  |
| Parvb         | 1.2805  | 10.0055  | 0.127979611 |
| LOC100504165  | 1.4645  | 11.6075  | 0.126168426 |
| Agxt2l1       | 1.4565  | 11.7705  | 0.123741557 |
| Wwc1          | 1.1365  | 9.202    | 0.12350576  |
| Tcf7l2        | 3.9335  | 31.9065  | 0.12328209  |



|               |         |          |             |
|---------------|---------|----------|-------------|
| Tmem176a      | 1.874   | 15.459   | 0.121223883 |
| Snhg11        | 23.78   | 201.901  | 0.117780496 |
| Pmp22         | 3.067   | 26.2225  | 0.116960625 |
| Bcas1         | 2.685   | 23       | 0.11673913  |
| Qk            | 12.781  | 114.316  | 0.111804122 |
| Fam107a       | 8.7805  | 79.693   | 0.110179062 |
| Rbm4          | 1.491   | 13.703   | 0.10880829  |
| Nrn1          | 3.549   | 32.7995  | 0.108202869 |
| 2310022B05Rik | 3.82    | 35.8675  | 0.106503102 |
| Ndr2          | 62.6645 | 589.7595 | 0.106254329 |
| Mog           | 2.015   | 19.1085  | 0.105450454 |
| Rsu1          | 2.754   | 26.5405  | 0.103765943 |
| Gatm          | 7.52    | 73.0725  | 0.102911492 |
| Dusp19        | 1.147   | 11.181   | 0.102584742 |
| Tmem176b      | 1.544   | 15.748   | 0.098044196 |
| Car2          | 13.129  | 140.0075 | 0.093773548 |
| Agt           | 1.324   | 14.298   | 0.092600364 |
| Otud7b        | 1.58    | 17.104   | 0.092376052 |
| Ifi47         | 2.1055  | 23.0565  | 0.091319151 |
| Iigp1         | 1.0095  | 11.105   | 0.090904998 |
| Zfp3611       | 1.3465  | 15.3535  | 0.087699873 |
| Gjc3          | 3.9425  | 45.131   | 0.087356806 |
| Hist1h2bc     | 4.4955  | 52.2325  | 0.086067104 |
| Tgtp2         | 2.3595  | 28.1765  | 0.083739996 |
| Trf           | 3.9945  | 47.7815  | 0.083599301 |
| Ptgds         | 53.307  | 646.3345 | 0.08247587  |
| Apod          | 12.1785 | 150.5595 | 0.080888287 |
| Nfix          | 3.1765  | 39.476   | 0.080466613 |
| Cxcl10        | 2.5695  | 32.4485  | 0.079187019 |
| Mal           | 5.217   | 67.389   | 0.077416196 |
| Olig1         | 4.9665  | 64.7245  | 0.076732922 |
| Slc1a3        | 2.0645  | 27.3845  | 0.075389363 |
| Zfp113        | 1.669   | 22.4515  | 0.074338018 |
| Sox8          | 1.692   | 22.8845  | 0.073936507 |
| Rab31         | 1.273   | 17.375   | 0.073266187 |
| Mobp          | 12.9625 | 177.913  | 0.072858644 |
| Arhgef10      | 1.0805  | 14.9365  | 0.072339571 |
| Cryab         | 16.5935 | 240.8685 | 0.068890287 |
| Klf3          | 1.2565  | 18.244   | 0.068871958 |
| Csrp1         | 8.4815  | 124.0525 | 0.068370246 |
| Arpc1b        | 1.033   | 15.397   | 0.067090992 |
| H2-K1         | 2.9255  | 44.5285  | 0.065699496 |
| Cd74          | 4.654   | 73.0425  | 0.06371633  |
| Zcchc24       | 1.0985  | 17.2755  | 0.063587161 |
| Kcnj10        | 1.406   | 23.945   | 0.058717895 |
| Plp1          | 16.804  | 291.1925 | 0.05770753  |
| Sparc         | 10.1615 | 187.361  | 0.054234873 |
| Sox10         | 1.497   | 27.778   | 0.053891569 |
| S100b         | 1.6125  | 31.5035  | 0.051184789 |
| Cbln1         | 1.7965  | 35.6355  | 0.050413212 |
| Sepp1         | 2.6455  | 55.579   | 0.047598913 |
| Pwwp2a        | 5.7165  | 120.63   | 0.047388709 |
| Psmb9         | 2.0195  | 44.2705  | 0.045617285 |
| Ifitm3        | 1.0695  | 23.826   | 0.044887938 |
| Ctss          | 1.4055  | 32.636   | 0.043065939 |

|         |          |           |             |
|---------|----------|-----------|-------------|
| Pla2g16 | 1.0135   | 24.4075   | 0.041524122 |
| Oxt     | 7.428    | 193.0665  | 0.03847379  |
| Fa2h    | 1.192    | 32.5945   | 0.036570587 |
| Trh     | 1.7715   | 50.619    | 0.03499674  |
| Ernn    | 2.259    | 75.474    | 0.029930837 |
| Il33    | 1.035    | 44.3205   | 0.023352625 |
| Mtrnr2l | 217.0675 | 9774.2375 | 0.022208126 |
