# Supplementary material
Source: PubMed Central journal article supplement (PMC5554302)
Supplement: NIHMS866509-supplement-supp_table2.pdf [file NIHMS866509-supplement-supp_table2.pdf]

**Extended Data Table 2.** Neuropeptide-encoding genes up- or down-regulated in GABA<sup>POA→TMN</sup> neurons identified by TRAP

**Up-regulated genes (IP/Input > 2)**

| Gene | IP/Input | Neuropeptide                    |
|------|----------|---------------------------------|
| Crh  | 3.46     | corticotropin releasing hormone |
| Gal  | 3.1      | galanin                         |
| Tac2 | 2.58     | tachykinin 2                    |
| Pnoc | 2.35     | prepronociceptin                |
| Cck  | 2.04     | cholecystokinin                 |

**Down-regulated genes (IP/Input < 0.5)**

| Gene    | IP/Input | Neuropeptide                               |
|---------|----------|--------------------------------------------|
| Adcyap1 | 0.19     | adenylate cyclase activating polypeptide 1 |

**Weakly regulated genes (0.5 < IP/Input < 2)**

| Gene  | IP/Input | Neuropeptide              |
|-------|----------|---------------------------|
| Tac1  | 1.07     | tachykinin 1              |
| Pdyn  | 0.76     | prodynorphin              |
| Grp   | 1.46     | gastrin-releasing peptide |
| Npy   | 0.61     | neuropeptide Y            |
| Penk  | 1.9      | proenkephalin             |
| Prok2 | 0.71     | prokineticin 2            |
| Sst   | 1.39     | somatostatin              |

\*Genes whose levels are FPKM<1 in either IP or Input are not shown
