# Supplementary material
Source: PubMed Central journal article supplement (PMC5554302)
Supplement: NIHMS866509-supplement-supp_videolegends.pdf [file NIHMS866509-supplement-supp_videolegends.pdf]

## Supplementary Video Legends

**Supplementary Video 1. Optogenetic activation of GABA<sup>POA→TMN</sup> neurons promotes sleep.**

The movie shows 2 laser stimulation trials, including 30 s before and after each laser stimulation period. The EEG spectrogram, EMG trace and color-coded hypnogram are shown on the right. Laser stimulation periods are depicted by the blue bar on the top right and additionally indicated as a blue square in the upper right corner of the movie frame. The movie is shown at 8× the original speed.

**Supplementary Video 2. Optogenetic activation of GABA<sup>POA</sup> neurons promotes wakefulness.** The movie shows 2 laser stimulation trials, including 30 s before and 60 s after each laser stimulation period. The movie is shown at 8× the original speed.

**Supplementary Video 3. Optogenetic activation of CCK neurons in the POA promotes sleep.** The movie shows 2 laser stimulation trials, including 30 s before and after each laser stimulation period. The movie is shown at 8× the original speed.
